# Supplementary material for: Molecular Structures of the Silicon Pyridine-2-(thi)olates Me3Si(pyX), Me2Si(pyX)2 and Ph2Si(pyX)2 (py = 2-Pyridyl, X = O, S), and Their Intra- and Intermolecular Ligand Exchange in Solution
Source: MDPI journal article supplement (doi:10.3390/cryst12081054), 2022-07-28

---

The following ALERTS were generated. Each ALERT has the format  
**test-name\_ALERT\_alert-type\_alert-level.**  
Click on the hyperlinks for more details of the test.

---

#### Alert level B

CRYSS02\_ALERT\_3\_B The value of \_exptl\_crystal\_size\_min is > 0.6  
Minimum crystal size given = 1.000

**Author Response: In this particular case, the crystal size is a result of the experimental setup, i.e., of crystal growth in a capillary on the diffractometer.**

CRYSS02\_ALERT\_3\_B The value of \_exptl\_crystal\_size\_mid is > 0.8  
Mid crystal size given = 1.000

**Author Response: In this particular case, the crystal size is a result of the experimental setup, i.e., of crystal growth in a capillary on the diffractometer.**

CRYSS02\_ALERT\_3\_B The value of \_exptl\_crystal\_size\_max is > 1.0  
Maximum crystal size given = 45.000

**Author Response: In this particular case, the crystal size is a result of the experimental setup, i.e., of crystal growth in a capillary on the diffractometer.**

---

#### Alert level C

|                                                                    |                                           |             |
|--------------------------------------------------------------------|-------------------------------------------|-------------|
| PLAT242_ALERT_2_C Low                                              | 'MainMol' Ueq as Compared to Neighbors of | Si1 Check   |
| PLAT242_ALERT_2_C Low                                              | 'MainMol' Ueq as Compared to Neighbors of | Si2 Check   |
| PLAT906_ALERT_3_C Large K Value in the Analysis of Variance .....  |                                           | 2.066 Check |
| PLAT911_ALERT_3_C Missing FCF Refl Between Thmin & STh/L=          | 0.595                                     | 20 Report   |
| PLAT918_ALERT_3_C Reflection(s) with I(obs) much Smaller I(calc) . |                                           | 1 Check     |

---

#### Alert level G

|                                                                    |              |
|--------------------------------------------------------------------|--------------|
| PLAT063_ALERT_4_G Crystal Size Possibly too Large for Beam Size .. | 45.00 mm     |
| PLAT883_ALERT_1_G No Info/Value for _atom_sites_solution_primary . | Please Do !  |
| PLAT909_ALERT_3_G Percentage of I>2sig(I) Data at Theta(Max) Still | 73% Note     |
| PLAT910_ALERT_3_G Missing # of FCF Reflection(s) Below Theta(Min). | 2 Note       |
| PLAT913_ALERT_3_G Missing # of Very Strong Reflections in FCF .... | 2 Note       |
| PLAT933_ALERT_2_G Number of HKL-OMIT Records in Embedded .res File | 17 Note      |
| PLAT961_ALERT_5_G Dataset Contains no Negative Intensities .....   | Please Check |
| PLAT967_ALERT_5_G Note: Two-Theta Cutoff Value in Embedded .res .. | 50.0 Degree  |
| PLAT978_ALERT_2_G Number C-C Bonds with Positive Residual Density. | 2 Info       |

- 
- 0 **ALERT level A** = Most likely a serious problem - resolve or explain  
3 **ALERT level B** = A potentially serious problem, consider carefully  
5 **ALERT level C** = Check. Ensure it is not caused by an omission or oversight  
9 **ALERT level G** = General information/check it is not something unexpected

1 ALERT type 1 CIF construction/syntax error, inconsistent or missing data  
4 ALERT type 2 Indicator that the structure model may be wrong or deficient  
9 ALERT type 3 Indicator that the structure quality may be low  
1 ALERT type 4 Improvement, methodology, query or suggestion  
2 ALERT type 5 Informative message, check

---

## Datablock: pyssime3\_01

---

Bond precision: C-C = 0.0033 A Wavelength=0.71073

Cell: a=6.6079 (7) b=7.2078 (6) c=11.1025 (12)  
alpha=90 beta=97.954 (9) gamma=90

Temperature: 220 K

|                        | Calculated    | Reported      |
|------------------------|---------------|---------------|
| Volume                 | 523.71 (9)    | 523.71 (9)    |
| Space group            | P 21/m        | P 21/m        |
| Hall group             | -P 2yb        | -P 2yb        |
| Moiety formula         | C8 H13 N S Si | C8 H13 N S Si |
| Sum formula            | C8 H13 N S Si | C8 H13 N S Si |
| Mr                     | 183.34        | 183.34        |
| Dx, g cm <sup>-3</sup> | 1.163         | 1.163         |
| Z                      | 2             | 2             |
| Mu (mm <sup>-1</sup> ) | 0.367         | 0.367         |
| F000                   | 196.0         | 196.0         |
| F000'                  | 196.45        |               |
| h, k, lmax             | 8, 9, 14      | 8, 9, 14      |
| Nref                   | 1357          | 1356          |
| Tmin, Tmax             | 0.650, 0.693  | 0.113, 0.656  |
| Tmin'                  | 0.000         |               |

Correction method= # Reported T Limits: Tmin=0.113 Tmax=0.656  
AbsCorr = INTEGRATION

Data completeness= 0.999 Theta(max)= 27.997

R(reflections)= 0.0330 ( 1255) wR2(reflections)=  
0.0948 ( 1356)

S = 1.106 Npar= 67

---

The following ALERTS were generated. Each ALERT has the format

**test-name\_ALERT\_alert-type\_alert-level.**

Click on the hyperlinks for more details of the test.

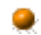

#### Alert level B

CRYSS02\_ALERT\_3\_B The value of \_exptl\_crystal\_size\_min is > 0.6  
Minimum crystal size given = 1.000

**Author Response: In this particular case, the crystal size is a result of the experimental setup, i.e., of crystal growth in a capillary on the diffractometer.**

CRYSS02\_ALERT\_3\_B The value of \_exptl\_crystal\_size\_mid is > 0.8  
Mid crystal size given = 1.000

**Author Response: In this particular case, the crystal size is a result of the experimental setup, i.e., of crystal growth in a capillary on the diffractometer.**

CRYSS02\_ALERT\_3\_B The value of \_exptl\_crystal\_size\_max is > 1.0  
Maximum crystal size given = 25.000

**Author Response: In this particular case, the crystal size is a result of the experimental setup, i.e., of crystal growth in a capillary on the diffractometer.**

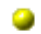

#### Alert level C

PLAT242\_ALERT\_2\_C Low 'MainMol' Ueq as Compared to Neighbors of Si1 Check

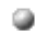

#### Alert level G

|                                                                     |                          |
|---------------------------------------------------------------------|--------------------------|
| PLAT063_ALERT_4_G Crystal Size Possibly too Large for Beam Size ..  | 25.00 mm                 |
| PLAT300_ALERT_4_G Atom Site Occupancy of H7A                        | Constrained at 0.5 Check |
| PLAT300_ALERT_4_G Atom Site Occupancy of H7B                        | Constrained at 0.5 Check |
| PLAT300_ALERT_4_G Atom Site Occupancy of H7C                        | Constrained at 0.5 Check |
| PLAT883_ALERT_1_G No Info/Value for _atom_sites_solution_primary .  | Please Do !              |
| PLAT910_ALERT_3_G Missing # of FCF Reflection(s) Below Theta (Min). | 1 Note                   |
| PLAT913_ALERT_3_G Missing # of Very Strong Reflections in FCF ....  | 1 Note                   |
| PLAT933_ALERT_2_G Number of HKL-OMIT Records in Embedded .res File  | 1 Note                   |
| PLAT961_ALERT_5_G Dataset Contains no Negative Intensities .....    | Please Check             |
| PLAT967_ALERT_5_G Note: Two-Theta Cutoff Value in Embedded .res ..  | 56.0 Degree              |
| PLAT978_ALERT_2_G Number C-C Bonds with Positive Residual Density.  | 3 Info                   |

---

0 **ALERT level A** = Most likely a serious problem - resolve or explain

3 **ALERT level B** = A potentially serious problem, consider carefully

1 **ALERT level C** = Check. Ensure it is not caused by an omission or oversight

11 **ALERT level G** = General information/check it is not something unexpected

1 ALERT type 1 CIF construction/syntax error, inconsistent or missing data

3 ALERT type 2 Indicator that the structure model may be wrong or deficient  
5 ALERT type 3 Indicator that the structure quality may be low  
4 ALERT type 4 Improvement, methodology, query or suggestion  
2 ALERT type 5 Informative message, check

---

## Datablock: le008b\_01

---

Bond precision: C-C = 0.0052 Å Wavelength=0.71073

Cell: a=12.7881(6) b=10.7211(6) c=18.6634(8)  
alpha=90 beta=90.247(4) gamma=90

Temperature: 200 K

|                        | Calculated       | Reported         |
|------------------------|------------------|------------------|
| Volume                 | 2558.8(2)        | 2558.8(2)        |
| Space group            | P 21/c           | P 21/c           |
| Hall group             | -P 2ybc          | -P 2ybc          |
| Moiety formula         | C12 H14 N2 O2 Si | C12 H14 N2 O2 Si |
| Sum formula            | C12 H14 N2 O2 Si | C12 H14 N2 O2 Si |
| Mr                     | 246.34           | 246.34           |
| Dx, g cm <sup>-3</sup> | 1.279            | 1.279            |
| Z                      | 8                | 8                |
| Mu (mm <sup>-1</sup> ) | 0.175            | 0.175            |
| F000                   | 1040.0           | 1040.0           |
| F000'                  | 1041.04          |                  |
| h, k, lmax             | 15, 12, 22       | 15, 12, 22       |
| Nref                   | 4528             | 4515             |
| Tmin, Tmax             | 0.975, 0.986     |                  |
| Tmin'                  | 0.932            |                  |

Correction method= Not given

Data completeness= 0.997 Theta(max)= 25.046

R(reflections)= 0.0460( 3174) wR2(reflections)=  
0.1112( 4515)

S = 1.045 Npar= 313

---

The following ALERTS were generated. Each ALERT has the format  
**test-name\_ALERT\_alert-type\_alert-level.**  
Click on the hyperlinks for more details of the test.

---

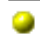 **Alert level C**

|                   |                                                 |              |
|-------------------|-------------------------------------------------|--------------|
| PLAT340_ALERT_3_C | Low Bond Precision on C-C Bonds .....           | 0.00519 Ang. |
| PLAT906_ALERT_3_C | Large K Value in the Analysis of Variance ..... | 2.079 Check  |
| PLAT911_ALERT_3_C | Missing FCF Refl Between Thmin & STh/L= 0.596   | 13 Report    |

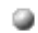

### Alert level G

|                   |                                                  |              |
|-------------------|--------------------------------------------------|--------------|
| PLAT870_ALERT_4_G | ALERTS Related to Twinning Effects Suppressed .. | ! Info       |
| PLAT883_ALERT_1_G | No Info/Value for _atom_sites_solution_primary . | Please Do !  |
| PLAT909_ALERT_3_G | Percentage of I>2sig(I) Data at Theta(Max) Still | 39% Note     |
| PLAT913_ALERT_3_G | Missing # of Very Strong Reflections in FCF .... | 1 Note       |
| PLAT931_ALERT_5_G | CIFcalcFCF Twin Law ( 1 0 0) Est.d BASF          | 0.21 Check   |
| PLAT933_ALERT_2_G | Number of HKL-OMIT Records in Embedded .res File | 2 Note       |
| PLAT941_ALERT_3_G | Average HKL Measurement Multiplicity .....       | 4.2 Low      |
| PLAT961_ALERT_5_G | Dataset Contains no Negative Intensities .....   | Please Check |
| PLAT967_ALERT_5_G | Note: Two-Theta Cutoff Value in Embedded .res .. | 50.1 Degree  |

- 
- 0 **ALERT level A** = Most likely a serious problem - resolve or explain  
 0 **ALERT level B** = A potentially serious problem, consider carefully  
 3 **ALERT level C** = Check. Ensure it is not caused by an omission or oversight  
 9 **ALERT level G** = General information/check it is not something unexpected
- 1 ALERT type 1 CIF construction/syntax error, inconsistent or missing data  
 1 ALERT type 2 Indicator that the structure model may be wrong or deficient  
 6 ALERT type 3 Indicator that the structure quality may be low  
 1 ALERT type 4 Improvement, methodology, query or suggestion  
 3 ALERT type 5 Informative message, check
- 

## Datablock: ml003l01

|                 |                 |                                |
|-----------------|-----------------|--------------------------------|
| Bond precision: | C-C = 0.0019 A  | Wavelength=0.71073             |
| Cell:           | a=9.7145(4)     | b=11.5896(5) c=12.9509(6)      |
|                 | alpha=73.601(3) | beta=89.903(3) gamma=85.998(3) |
| Temperature:    | 200 K           |                                |



0 **ALERT level B** = A potentially serious problem, consider carefully  
 4 **ALERT level C** = Check. Ensure it is not caused by an omission or oversight  
 7 **ALERT level G** = General information/check it is not something unexpected

2 ALERT type 1 CIF construction/syntax error, inconsistent or missing data  
 3 ALERT type 2 Indicator that the structure model may be wrong or deficient  
 3 ALERT type 3 Indicator that the structure quality may be low  
 0 ALERT type 4 Improvement, methodology, query or suggestion  
 3 ALERT type 5 Informative message, check

---

## Datablock: as-002d\_01

---

Bond precision: C-C = 0.0000 A Wavelength=0.71073

Cell: a=6.1626(2) b=8.8822(3) c=26.4639(9)  
 alpha=88.692(3) beta=88.561(3) gamma=81.453(3)

Temperature: 200 K

|                        | Calculated       | Reported         |
|------------------------|------------------|------------------|
| Volume                 | 1431.76(8)       | 1431.76(8)       |
| Space group            | P 1              | P 1              |
| Hall group             | P 1              | P 1              |
| Moiety formula         | C22 H18 N2 O2 Si | C22 H18 N2 O2 Si |
| Sum formula            | C22 H18 N2 O2 Si | C22 H18 N2 O2 Si |
| Mr                     | 370.47           | 370.47           |
| Dx, g cm <sup>-3</sup> | 1.289            | 1.289            |
| Z                      | 3                | 3                |
| Mu (mm <sup>-1</sup> ) | 0.142            | 0.142            |
| F000                   | 582.0            | 582.0            |
| F000'                  | 582.46           |                  |
| h, k, lmax             | 8, 11, 34        | 8, 11, 34        |
| Nref                   | 13832[ 6916]     | 13251            |
| Tmin, Tmax             | 0.926, 0.945     | 0.923, 0.945     |
| Tmin'                  | 0.925            |                  |

Correction method= # Reported T Limits: Tmin=0.923 Tmax=0.945  
 AbsCorr = INTEGRATION

Data completeness= 1.92/0.96 Theta(max)= 27.999

R(reflections)= 0.0389( 12147) wR2(reflections)=  
 0.1061( 13251)

S = 1.057 Npar= 846

---

The following ALERTS were generated. Each ALERT has the format

**test-name\_ALERT\_alert-type\_alert-level.**

Click on the hyperlinks for more details of the test.

---

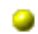

#### Alert level C

|                   |                                                  |   |        |
|-------------------|--------------------------------------------------|---|--------|
| PLAT910_ALERT_3_C | Missing # of FCF Reflection(s) Below Theta(Min). | 6 | Note   |
| PLAT911_ALERT_3_C | Missing FCF Refl Between Thmin & STh/L= 0.600    | 5 | Report |
| PLAT913_ALERT_3_C | Missing # of Very Strong Reflections in FCF .... | 4 | Note   |

---

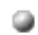

#### Alert level G

|                   |                                                  |       |              |
|-------------------|--------------------------------------------------|-------|--------------|
| PLAT002_ALERT_2_G | Number of Distance or Angle Restraints on AtSite | 48    | Note         |
| PLAT033_ALERT_4_G | Flack x Value Deviates > 3.0 * sigma from Zero . | 0.100 | Note         |
| PLAT066_ALERT_1_G | Predicted and Reported Tmin&Tmax Range Identical | ?     | Check        |
| PLAT154_ALERT_1_G | The s.u.'s on the Cell Angles are Equal ..(Note) | 0.003 | Degree       |
| PLAT168_ALERT_4_G | The CIF-Embedded .res File Contains EXYZ Records | 3     | Report       |
| PLAT171_ALERT_4_G | The CIF-Embedded .res File Contains EADP Records | 49    | Report       |
| PLAT174_ALERT_4_G | The CIF-Embedded .res File Contains FLAT Records | 3     | Report       |
| PLAT176_ALERT_4_G | The CIF-Embedded .res File Contains SADI Records | 21    | Report       |
| PLAT301_ALERT_3_G | Main Residue Disorder .....(Resd 1 )             | 100%  | Note         |
| PLAT301_ALERT_3_G | Main Residue Disorder .....(Resd 4 )             | 100%  | Note         |
| PLAT302_ALERT_4_G | Anion/Solvent/Minor-Residue Disorder (Resd 2 )   | 100%  | Note         |
| PLAT302_ALERT_4_G | Anion/Solvent/Minor-Residue Disorder (Resd 3 )   | 100%  | Note         |
| PLAT302_ALERT_4_G | Anion/Solvent/Minor-Residue Disorder (Resd 5 )   | 100%  | Note         |
| PLAT302_ALERT_4_G | Anion/Solvent/Minor-Residue Disorder (Resd 6 )   | 100%  | Note         |
| PLAT304_ALERT_4_G | Non-Integer Number of Atoms in ..... (Resd 1 )   | 41.85 | Check        |
| PLAT304_ALERT_4_G | Non-Integer Number of Atoms in ..... (Resd 2 )   | 39.65 | Check        |
| PLAT304_ALERT_4_G | Non-Integer Number of Atoms in ..... (Resd 3 )   | 39.65 | Check        |
| PLAT304_ALERT_4_G | Non-Integer Number of Atoms in ..... (Resd 4 )   | 3.15  | Check        |
| PLAT304_ALERT_4_G | Non-Integer Number of Atoms in ..... (Resd 5 )   | 5.35  | Check        |
| PLAT304_ALERT_4_G | Non-Integer Number of Atoms in ..... (Resd 6 )   | 5.35  | Check        |
| PLAT395_ALERT_2_G | Deviating X-O-Y Angle From 120 for O1A .         | 133.0 | Degree       |
| PLAT860_ALERT_3_G | Number of Least-Squares Restraints .....         | 36    | Note         |
| PLAT883_ALERT_1_G | No Info/Value for _atom_sites_solution_primary . |       | Please Do !  |
| PLAT961_ALERT_5_G | Dataset Contains no Negative Intensities .....   |       | Please Check |
| PLAT967_ALERT_5_G | Note: Two-Theta Cutoff Value in Embedded .res .. | 56.0  | Degree       |
| PLAT978_ALERT_2_G | Number C-C Bonds with Positive Residual Density. | 13    | Info         |
| PLAT992_ALERT_5_G | Repd & Actual _reflns_number_gt Values Differ by | 3     | Check        |

---

- 0 **ALERT level A** = Most likely a serious problem - resolve or explain  
0 **ALERT level B** = A potentially serious problem, consider carefully  
3 **ALERT level C** = Check. Ensure it is not caused by an omission or oversight  
27 **ALERT level G** = General information/check it is not something unexpected
- 3 ALERT type 1 CIF construction/syntax error, inconsistent or missing data  
3 ALERT type 2 Indicator that the structure model may be wrong or deficient  
6 ALERT type 3 Indicator that the structure quality may be low  
15 ALERT type 4 Improvement, methodology, query or suggestion  
3 ALERT type 5 Informative message, check
- 

**Datablock: ml001filtr01**

---

Bond precision: C-C = 0.0023 Å

Wavelength=0.71073

Cell: a=9.4763(8) b=10.2415(8) c=11.1044(8)  
alpha=96.698(6) beta=114.442(6) gamma=90.107(6)  
Temperature: 200 K

|                        | Calculated       | Reported         |
|------------------------|------------------|------------------|
| Volume                 | 972.92(14)       | 972.92(14)       |
| Space group            | P -1             | P -1             |
| Hall group             | -P 1             | -P 1             |
| Moiety formula         | C22 H18 N2 S2 Si | C22 H18 N2 S2 Si |
| Sum formula            | C22 H18 N2 S2 Si | C22 H18 N2 S2 Si |
| Mr                     | 402.59           | 402.59           |
| Dx, g cm <sup>-3</sup> | 1.374            | 1.374            |
| Z                      | 2                | 2                |
| Mu (mm <sup>-1</sup> ) | 0.345            | 0.345            |
| F000                   | 420.0            | 420.0            |
| F000'                  | 420.77           |                  |
| h, k, lmax             | 12, 13, 14       | 12, 13, 14       |
| Nref                   | 4705             | 4698             |
| Tmin, Tmax             | 0.847, 0.902     | 0.913, 0.955     |
| Tmin'                  | 0.842            |                  |

Correction method= # Reported T Limits: Tmin=0.913 Tmax=0.955  
AbsCorr = INTEGRATION

Data completeness= 0.999

Theta(max)= 27.997

R(reflections)= 0.0313( 4149)

wR2(reflections)=  
0.0837( 4698)

S = 1.102

Npar= 244

---

The following ALERTS were generated. Each ALERT has the format

**test-name\_ALERT\_alert-type\_alert-level.**

Click on the hyperlinks for more details of the test.

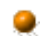

#### **Alert level B**

PLAT230\_ALERT\_2\_B Hirshfeld Test Diff for S1 --Si1 . 16.0 s.u.

**Author Response:** The displacement ellipsoids of the atoms Si1, S1, S2 and C6 are close to spherical. Therefore, those deviations in their principal axes orientation are unlikely to hint at unresolved disorder or other unresolved effects.

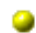

---

**Alert level C**

PLAT230\_ALERT\_2\_C Hirshfeld Test Diff for S2 --Si1 . 5.5 s.u.

**Author Response:** The displacement ellipsoids of the atoms Si1, S1, S2 and C6 are close to spherical. Therefore, those deviations in their principal axes orientation are unlikely to hint at unresolved disorder or other unresolved effects.

PLAT230\_ALERT\_2\_C Hirshfeld Test Diff for S2 --C6 . 5.3 s.u.

**Author Response:** The displacement ellipsoids of the atoms Si1, S1, S2 and C6 are close to spherical. Therefore, those deviations in their principal axes orientation are unlikely to hint at unresolved disorder or other unresolved effects.

PLAT911\_ALERT\_3\_C Missing FCF Refl Between Thmin & STh/L= 0.600 4 Report

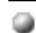

---

**Alert level G**

|                                                                    |              |
|--------------------------------------------------------------------|--------------|
| PLAT154_ALERT_1_G The s.u.'s on the Cell Angles are Equal ..(Note) | 0.006 Degree |
| PLAT883_ALERT_1_G No Info/Value for _atom_sites_solution_primary . | Please Do !  |
| PLAT910_ALERT_3_G Missing # of FCF Reflection(s) Below Theta(Min). | 4 Note       |
| PLAT933_ALERT_2_G Number of HKL-OMIT Records in Embedded .res File | 1 Note       |
| PLAT941_ALERT_3_G Average HKL Measurement Multiplicity .....       | 3.1 Low      |
| PLAT961_ALERT_5_G Dataset Contains no Negative Intensities .....   | Please Check |
| PLAT967_ALERT_5_G Note: Two-Theta Cutoff Value in Embedded .res .. | 56.0 Degree  |
| PLAT978_ALERT_2_G Number C-C Bonds with Positive Residual Density. | 13 Info      |

- 
- 0 **ALERT level A** = Most likely a serious problem - resolve or explain  
1 **ALERT level B** = A potentially serious problem, consider carefully  
3 **ALERT level C** = Check. Ensure it is not caused by an omission or oversight  
8 **ALERT level G** = General information/check it is not something unexpected

- 2 ALERT type 1 CIF construction/syntax error, inconsistent or missing data  
5 ALERT type 2 Indicator that the structure model may be wrong or deficient  
3 ALERT type 3 Indicator that the structure quality may be low  
0 ALERT type 4 Improvement, methodology, query or suggestion  
2 ALERT type 5 Informative message, check
- 

## Datablock: as048c\_02

---

Bond precision: C-C = 0.0032 A

Wavelength=0.71073

|                   |                                                  |      |              |
|-------------------|--------------------------------------------------|------|--------------|
| PLAT913_ALERT_3_G | Missing # of Very Strong Reflections in FCF .... | 1    | Note         |
| PLAT941_ALERT_3_G | Average HKL Measurement Multiplicity .....       | 4.8  | Low          |
| PLAT961_ALERT_5_G | Dataset Contains no Negative Intensities .....   |      | Please Check |
| PLAT967_ALERT_5_G | Note: Two-Theta Cutoff Value in Embedded .res .. | 54.0 | Degree       |
| PLAT978_ALERT_2_G | Number C-C Bonds with Positive Residual Density. | 11   | Info         |

0 **ALERT level A** = Most likely a serious problem - resolve or explain  
 0 **ALERT level B** = A potentially serious problem, consider carefully  
 2 **ALERT level C** = Check. Ensure it is not caused by an omission or oversight  
 5 **ALERT level G** = General information/check it is not something unexpected

0 ALERT type 1 CIF construction/syntax error, inconsistent or missing data  
 1 ALERT type 2 Indicator that the structure model may be wrong or deficient  
 4 ALERT type 3 Indicator that the structure quality may be low  
 0 ALERT type 4 Improvement, methodology, query or suggestion  
 2 ALERT type 5 Informative message, check

---

## Datablock: as054\_thfpentan\_01

---

Bond precision: C-C = 0.0042 A Wavelength=0.71073

Cell: a=10.9877(5) b=19.5766(9) c=9.7361(5)  
 alpha=90 beta=97.501(4) gamma=90

Temperature: 200 K

|                        | Calculated       | Reported         |
|------------------------|------------------|------------------|
| Volume                 | 2076.33(17)      | 2076.33(17)      |
| Space group            | C 2/c            | C 2/c            |
| Hall group             | -C 2yc           | -C 2yc           |
| Moiety formula         | C22 H18 N2 S2 Si | C22 H18 N2 S2 Si |
| Sum formula            | C22 H18 N2 S2 Si | C22 H18 N2 S2 Si |
| Mr                     | 402.59           | 402.59           |
| Dx, g cm <sup>-3</sup> | 1.288            | 1.288            |
| Z                      | 4                | 4                |
| Mu (mm <sup>-1</sup> ) | 0.323            | 0.323            |
| F000                   | 840.0            | 840.0            |
| F000'                  | 841.54           |                  |
| h, k, lmax             | 13, 23, 11       | 13, 23, 11       |
| Nref                   | 1828             | 1829             |
| Tmin, Tmax             | 0.944, 0.994     | 0.943, 0.991     |
| Tmin'                  | 0.937            |                  |

Correction method= # Reported T Limits: Tmin=0.943 Tmax=0.991  
 AbsCorr = INTEGRATION

Data completeness= 1.001 Theta(max)= 24.996

R(reflections)= 0.0429( 1375) wR2(reflections)=  
 0.1001( 1829)

S = 1.081 Npar= 124

---

The following ALERTS were generated. Each ALERT has the format

**test-name\_ALERT\_alert-type\_alert-level.**

Click on the hyperlinks for more details of the test.

---



#### **Alert level C**

|                   |                                                 |             |
|-------------------|-------------------------------------------------|-------------|
| PLAT340_ALERT_3_C | Low Bond Precision on C-C Bonds .....           | 0.0042 Ang. |
| PLAT906_ALERT_3_C | Large K Value in the Analysis of Variance ..... | 5.948 Check |

---

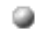

#### **Alert level G**

|                   |                                                  |              |
|-------------------|--------------------------------------------------|--------------|
| PLAT066_ALERT_1_G | Predicted and Reported Tmin&Tmax Range Identical | ? Check      |
| PLAT909_ALERT_3_G | Percentage of I>2sig(I) Data at Theta(Max) Still | 52% Note     |
| PLAT961_ALERT_5_G | Dataset Contains no Negative Intensities .....   | Please Check |
| PLAT965_ALERT_2_G | The SHELXL WEIGHT Optimisation has not Converged | Please Check |
| PLAT967_ALERT_5_G | Note: Two-Theta Cutoff Value in Embedded .res .. | 50.0 Degree  |
| PLAT978_ALERT_2_G | Number C-C Bonds with Positive Residual Density. | 4 Info       |

---

- 0 **ALERT level A** = Most likely a serious problem - resolve or explain  
0 **ALERT level B** = A potentially serious problem, consider carefully  
2 **ALERT level C** = Check. Ensure it is not caused by an omission or oversight  
6 **ALERT level G** = General information/check it is not something unexpected

- 1 ALERT type 1 CIF construction/syntax error, inconsistent or missing data  
2 ALERT type 2 Indicator that the structure model may be wrong or deficient  
3 ALERT type 3 Indicator that the structure quality may be low  
0 ALERT type 4 Improvement, methodology, query or suggestion  
2 ALERT type 5 Informative message, check
- 

## **Datablock: ml001tolhex01\_sq\_sq**

---

Bond precision: C-C = 0.0033 A

Wavelength=0.71073

|              |                  |                 |                  |
|--------------|------------------|-----------------|------------------|
| Cell:        | a=9.7034 (9)     | b=11.2023 (9)   | c=13.2853 (13)   |
|              | alpha=73.607 (7) | beta=72.232 (7) | gamma=82.511 (7) |
| Temperature: | 200 K            |                 |                  |

|                        | Calculated                                | Reported                |
|------------------------|-------------------------------------------|-------------------------|
| Volume                 | 1317.8(2)                                 | 1317.8(2)               |
| Space group            | P -1                                      | P -1                    |
| Hall group             | -P 1                                      | -P 1                    |
| Moiety formula         | 2(C22 H18 N2 S2 Si), C7 H8<br>[+ solvent] | C22 H18 N2 S2 Si, C7 H8 |
| Sum formula            | C51 H44 N4 S4 Si2 [+<br>solvent]          | C29 H26 N2 S2 Si        |
| Mr                     | 897.32                                    | 494.73                  |
| Dx, g cm <sup>-3</sup> | 1.131                                     | 1.247                   |
| Z                      | 1                                         | 2                       |
| Mu (mm <sup>-1</sup> ) | 0.261                                     | 0.268                   |
| F000                   | 470.0                                     | 520.0                   |
| F000'                  | 470.78                                    |                         |
| h,k,lmax               | 11,13,15                                  | 11,13,15                |
| Nref                   | 4649                                      | 4641                    |
| Tmin,Tmax              | 0.953,0.979                               | 0.913,0.980             |
| Tmin'                  | 0.886                                     |                         |

Correction method= # Reported T Limits: Tmin=0.913 Tmax=0.980  
AbsCorr = INTEGRATION

Data completeness= 0.998                      Theta(max)= 24.984

R(reflections)= 0.0365( 3505)                      wR2(reflections)=  
0.0929( 4641)  
S = 1.043                      Npar= 296

The following ALERTS were generated. Each ALERT has the format  
**test-name\_ALERT\_alert-type\_alert-level.**  
Click on the hyperlinks for more details of the test.

#### Alert level C

|                                                                    |       |        |
|--------------------------------------------------------------------|-------|--------|
| PLAT250_ALERT_2_C Large U3/U1 Ratio for Average U(i,j) Tensor .... | 2.6   | Note   |
| PLAT260_ALERT_2_C Large Average Ueq of Residue Including C23       | 0.131 | Check  |
| PLAT906_ALERT_3_C Large K Value in the Analysis of Variance .....  | 2.179 | Check  |
| PLAT910_ALERT_3_C Missing # of FCF Reflection(s) Below Theta(Min). | 5     | Note   |
| PLAT911_ALERT_3_C Missing FCF Refl Between Thmin & STh/L= 0.594    | 4     | Report |

#### Alert level G

FORMU01\_ALERT\_2\_G There is a discrepancy between the atom counts in the  
\_chemical\_formula\_sum and the formula from the \_atom\_site\* data.  
Atom count from \_chemical\_formula\_sum: C29 H26 N2 S2 Si1  
Atom count from the \_atom\_site data: C25.5 H22 N2 S2 Si1  
CELLZ01\_ALERT\_1\_G Difference between formula and atom\_site contents detected.  
CELLZ01\_ALERT\_1\_G ALERT: Large difference may be due to a

symmetry error - see SYMMG tests  
 From the CIF: \_cell\_formula\_units\_Z 2  
 From the CIF: \_chemical\_formula\_sum C29 H26 N2 S2 Si  
 TEST: Compare cell contents of formula and atom\_site data

| atom | Z*formula | cif sites | diff |
|------|-----------|-----------|------|
| C    | 58.00     | 51.00     | 7.00 |
| H    | 52.00     | 44.00     | 8.00 |
| N    | 4.00      | 4.00      | 0.00 |
| S    | 4.00      | 4.00      | 0.00 |
| Si   | 2.00      | 2.00      | 0.00 |

|                   |                                                  |                |           |
|-------------------|--------------------------------------------------|----------------|-----------|
| PLAT002_ALERT_2_G | Number of Distance or Angle Restraints on AtSite | 4              | Note      |
| PLAT003_ALERT_2_G | Number of Uiso or Uij Restrained non-H Atoms ... | 7              | Report    |
| PLAT041_ALERT_1_G | Calc. and Reported SumFormula Strings Differ     | Please         | Check     |
| PLAT042_ALERT_1_G | Calc. and Reported Moiety Formula Strings Differ | Please         | Check     |
| PLAT045_ALERT_1_G | Calculated and Reported Z Differ by a Factor ... | 1.             | Check     |
| PLAT154_ALERT_1_G | The s.u.'s on the Cell Angles are Equal ..(Note) | 0.007          | Degree    |
| PLAT172_ALERT_4_G | The CIF-Embedded .res File Contains DFIX Records | 1              | Report    |
| PLAT176_ALERT_4_G | The CIF-Embedded .res File Contains SADI Records | 1              | Report    |
| PLAT177_ALERT_4_G | The CIF-Embedded .res File Contains DELU Records | 1              | Report    |
| PLAT178_ALERT_4_G | The CIF-Embedded .res File Contains SIMU Records | 1              | Report    |
| PLAT300_ALERT_4_G | Atom Site Occupancy of C23                       | Constrained at | 0.5 Check |
| PLAT300_ALERT_4_G | Atom Site Occupancy of C24                       | Constrained at | 0.5 Check |
| PLAT300_ALERT_4_G | Atom Site Occupancy of C25                       | Constrained at | 0.5 Check |
| PLAT300_ALERT_4_G | Atom Site Occupancy of C26                       | Constrained at | 0.5 Check |
| PLAT300_ALERT_4_G | Atom Site Occupancy of C27                       | Constrained at | 0.5 Check |
| PLAT300_ALERT_4_G | Atom Site Occupancy of C28                       | Constrained at | 0.5 Check |
| PLAT300_ALERT_4_G | Atom Site Occupancy of C29                       | Constrained at | 0.5 Check |
| PLAT300_ALERT_4_G | Atom Site Occupancy of H23A                      | Constrained at | 0.5 Check |
| PLAT300_ALERT_4_G | Atom Site Occupancy of H23B                      | Constrained at | 0.5 Check |
| PLAT300_ALERT_4_G | Atom Site Occupancy of H23C                      | Constrained at | 0.5 Check |
| PLAT300_ALERT_4_G | Atom Site Occupancy of H25                       | Constrained at | 0.5 Check |
| PLAT300_ALERT_4_G | Atom Site Occupancy of H26                       | Constrained at | 0.5 Check |
| PLAT300_ALERT_4_G | Atom Site Occupancy of H27                       | Constrained at | 0.5 Check |
| PLAT300_ALERT_4_G | Atom Site Occupancy of H28                       | Constrained at | 0.5 Check |
| PLAT300_ALERT_4_G | Atom Site Occupancy of H29                       | Constrained at | 0.5 Check |
| PLAT302_ALERT_4_G | Anion/Solvent/Minor-Residue Disorder (Resd 2 )   | 100%           | Note      |
| PLAT304_ALERT_4_G | Non-Integer Number of Atoms in ..... (Resd 2 )   | 7.50           | Check     |
| PLAT605_ALERT_4_G | Largest Solvent Accessible VOID in the Structure | 231            | A**3      |
| PLAT789_ALERT_4_G | Atoms with Negative _atom_site_disorder_group #  | 15             | Check     |
| PLAT860_ALERT_3_G | Number of Least-Squares Restraints .....         | 59             | Note      |
| PLAT869_ALERT_4_G | ALERTS Related to the Use of SQUEEZE Suppressed  | !              | Info      |
| PLAT883_ALERT_1_G | No Info/Value for _atom_sites_solution_primary . | Please         | Do !      |
| PLAT909_ALERT_3_G | Percentage of I>2sig(I) Data at Theta(Max) Still | 52%            | Note      |
| PLAT941_ALERT_3_G | Average HKL Measurement Multiplicity .....       | 2.7            | Low       |
| PLAT961_ALERT_5_G | Dataset Contains no Negative Intensities .....   | Please         | Check     |
| PLAT967_ALERT_5_G | Note: Two-Theta Cutoff Value in Embedded .res .. | 50.0           | Degree    |
| PLAT978_ALERT_2_G | Number C-C Bonds with Positive Residual Density. | 5              | Info      |

---

0 **ALERT level A** = Most likely a serious problem - resolve or explain  
 0 **ALERT level B** = A potentially serious problem, consider carefully  
 5 **ALERT level C** = Check. Ensure it is not caused by an omission or oversight  
 40 **ALERT level G** = General information/check it is not something unexpected

7 ALERT type 1 CIF construction/syntax error, inconsistent or missing data

6 ALERT type 2 Indicator that the structure model may be wrong or deficient  
6 ALERT type 3 Indicator that the structure quality may be low  
24 ALERT type 4 Improvement, methodology, query or suggestion  
2 ALERT type 5 Informative message, check

---

## checkCIF publication errors

---

### **Alert level A**

PUBL004\_ALERT\_1\_A The contact author's name and address are missing,  
\_publ\_contact\_author\_name and \_publ\_contact\_author\_address.  
PUBL005\_ALERT\_1\_A \_publ\_contact\_author\_email, \_publ\_contact\_author\_fax and  
\_publ\_contact\_author\_phone are all missing.  
At least one of these should be present.  
PUBL006\_ALERT\_1\_A \_publ\_requested\_journal is missing  
e.g. 'Acta Crystallographica Section C'  
PUBL008\_ALERT\_1\_A \_publ\_section\_title is missing. Title of paper.  
PUBL009\_ALERT\_1\_A \_publ\_author\_name is missing. List of author(s) name(s).  
PUBL010\_ALERT\_1\_A \_publ\_author\_address is missing. Author(s) address(es).  
PUBL012\_ALERT\_1\_A \_publ\_section\_abstract is missing.  
Abstract of paper in English.

---

### **Alert level G**

PUBL017\_ALERT\_1\_G The \_publ\_section\_references section is missing or  
empty.

---

7 **ALERT level A** = Data missing that is essential or data in wrong format  
1 **ALERT level G** = General alerts. Data that may be required is missing

---

## Publication of your CIF

You should attempt to resolve as many as possible of the alerts in all categories. Often the minor alerts point to easily fixed oversights, errors and omissions in your CIF or refinement strategy, so attention to these fine details can be worthwhile. In order to resolve some of the more serious problems it may be necessary to carry out additional measurements or structure refinements. However, the nature of your study may justify the reported deviations from journal submission requirements and the more serious of these should be commented upon in the discussion or experimental section of a paper or in the "special\_details" fields of the CIF. *checkCIF* was carefully designed to identify outliers and unusual parameters, but every test has its limitations and alerts that are not important in a particular case may appear. Conversely, the absence of alerts does not guarantee there are no aspects of the results needing attention. It is up to the individual to critically assess their own results and, if necessary, seek expert advice.

If level A alerts remain, which you believe to be justified deviations, and you intend to submit this CIF for publication in a journal, you should additionally insert an explanation in your CIF using the Validation Reply Form (VRF) below. This will allow your explanation to be considered as part of the review process.

## Validation response form

Please find below a validation response form (VRF) that can be filled in and pasted into your CIF.

```
# start Validation Reply Form
_vrf_PUBL004_GLOBAL
;
PROBLEM: The contact author's name and address are missing,
RESPONSE: ...
;
_vrf_PUBL005_GLOBAL
;
PROBLEM: _publ_contact_author_email, _publ_contact_author_fax and
RESPONSE: ...
;
_vrf_PUBL006_GLOBAL
;
PROBLEM: _publ_requested_journal is missing
RESPONSE: ...
;
_vrf_PUBL008_GLOBAL
;
PROBLEM: _publ_section_title is missing. Title of paper.
RESPONSE: ...
;
_vrf_PUBL009_GLOBAL
;
PROBLEM: _publ_author_name is missing. List of author(s) name(s).
RESPONSE: ...
;
_vrf_PUBL010_GLOBAL
;
PROBLEM: _publ_author_address is missing. Author(s) address(es).
```

RESPONSE: ...

;

\_vrf\_PUBL012\_GLOBAL

;

PROBLEM: \_publ\_section\_abstract is missing.

RESPONSE: ...

;

# end Validation Reply Form

If you wish to submit your CIF for publication in Acta Crystallographica Section C or E, you should upload your CIF via the web. If you wish to submit your CIF for publication in IUCrData you should upload your CIF via the web. If your CIF is to form part of a submission to another IUCr journal, you will be asked, either during electronic submission or by the Co-editor handling your paper, to upload your CIF via our web site.

---

### PLATON version of 18/05/2022; check.def file version of 19/01/2022

Datablock pyosime3\_02 - ellipsoid plot

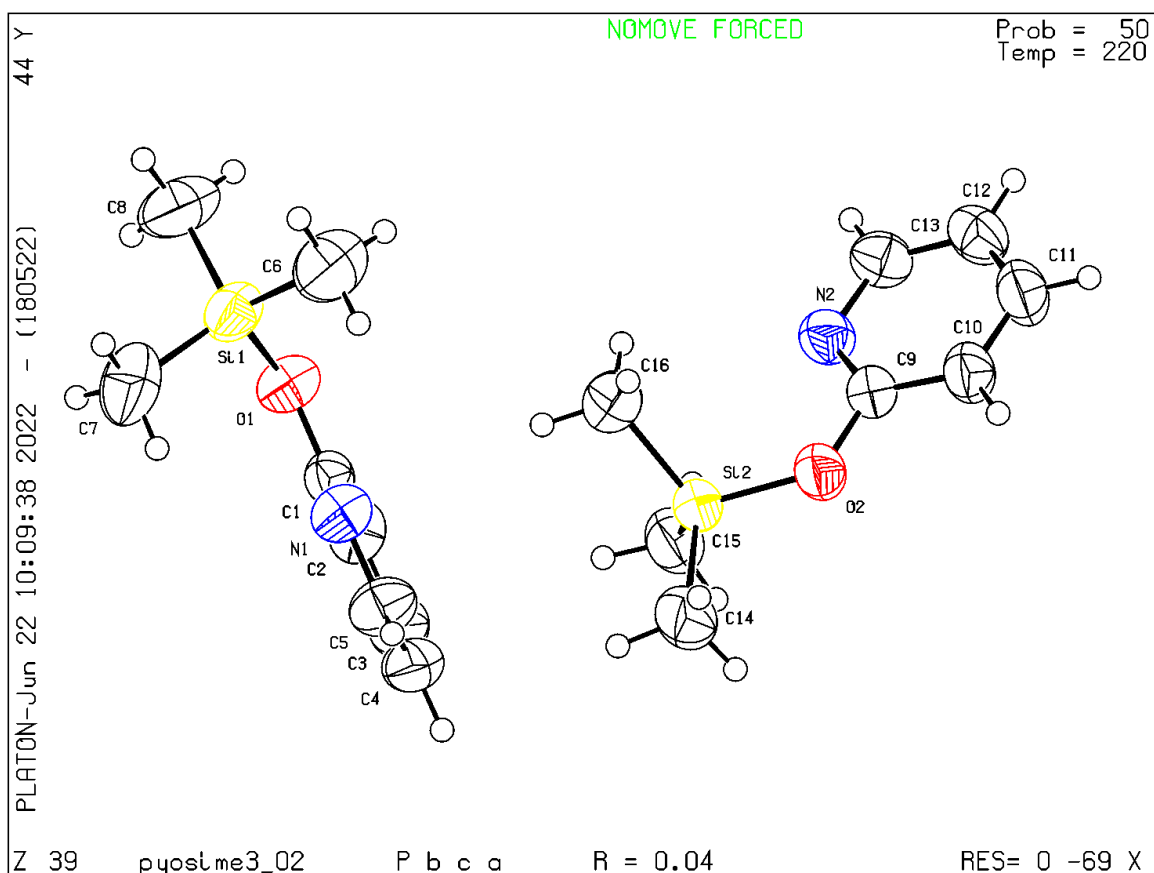

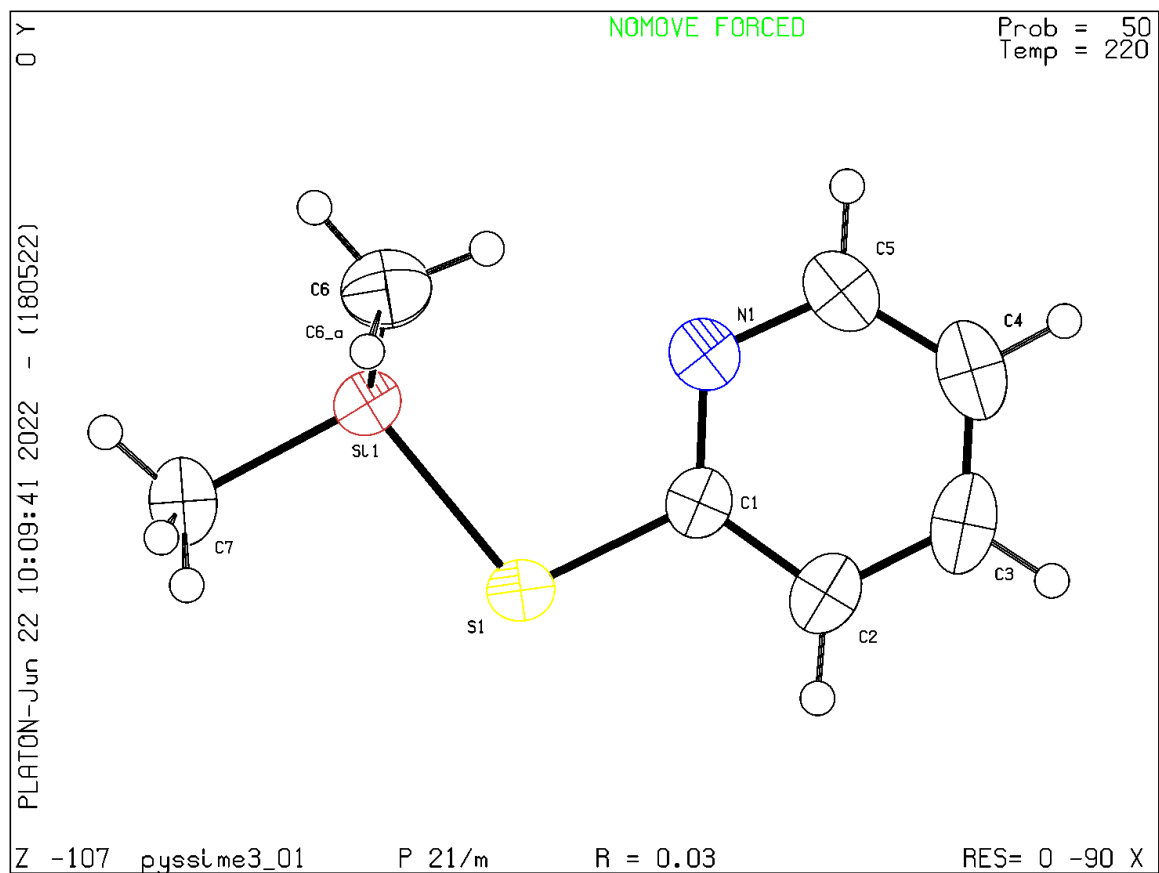

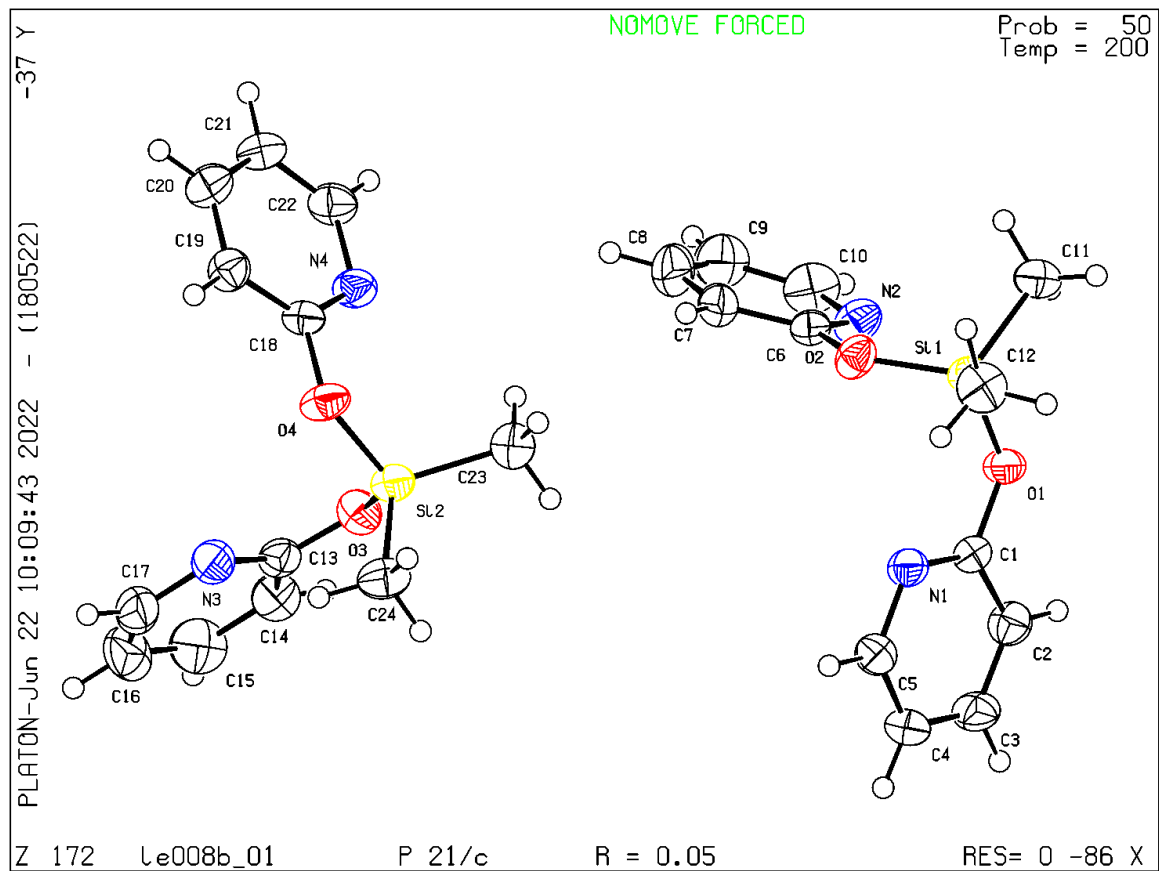

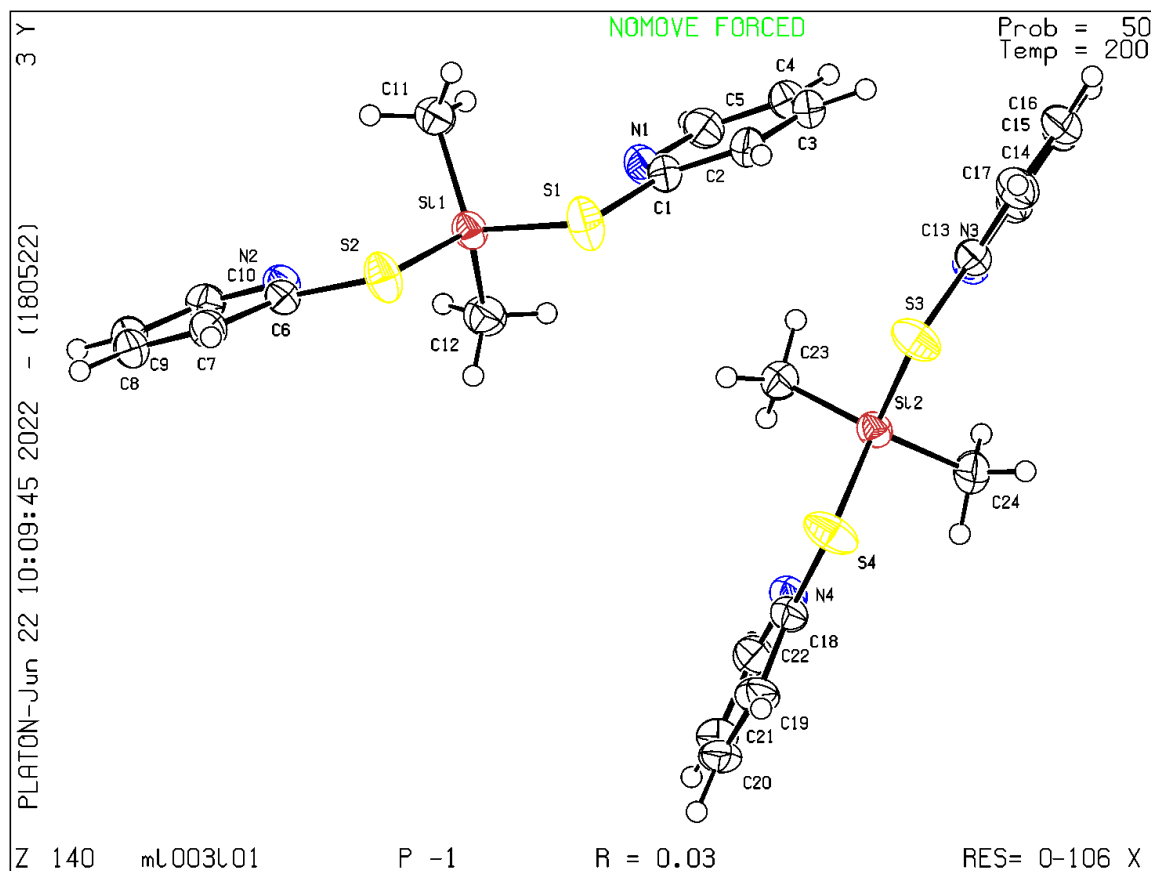

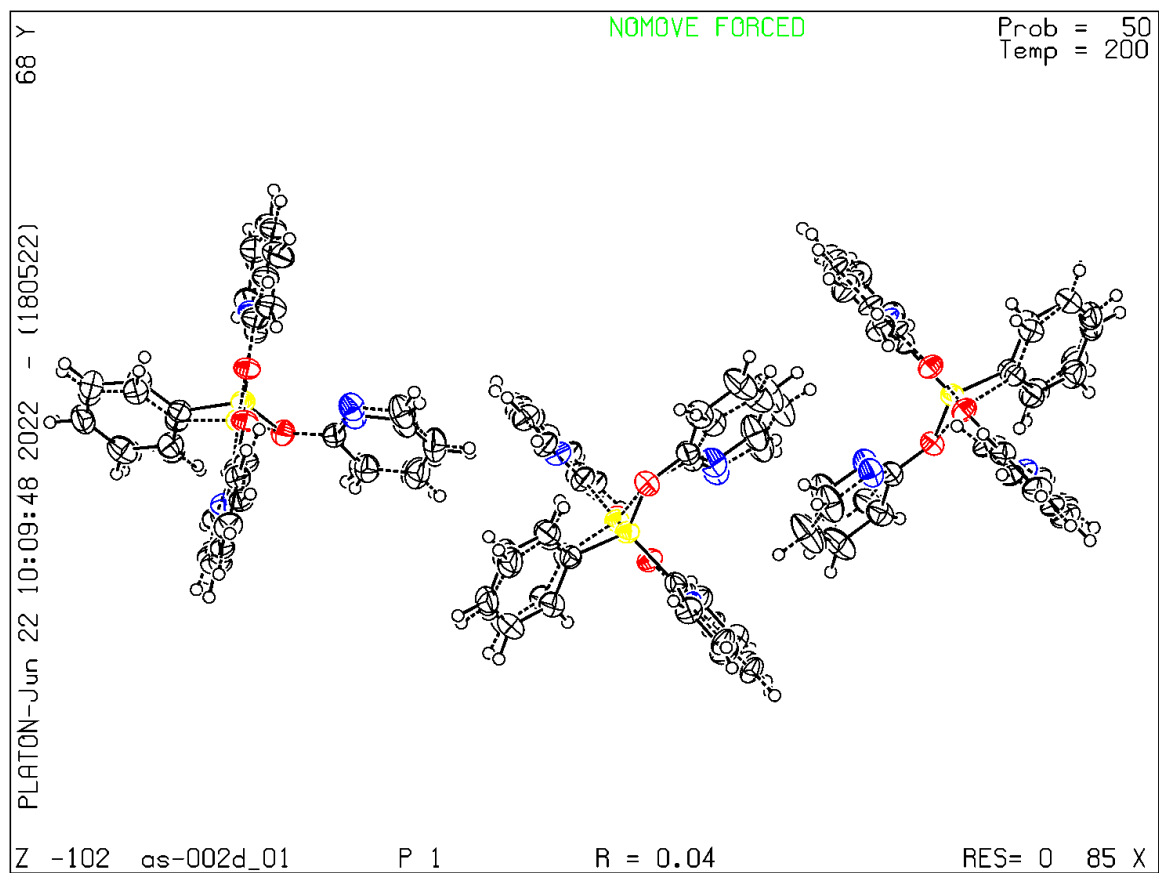

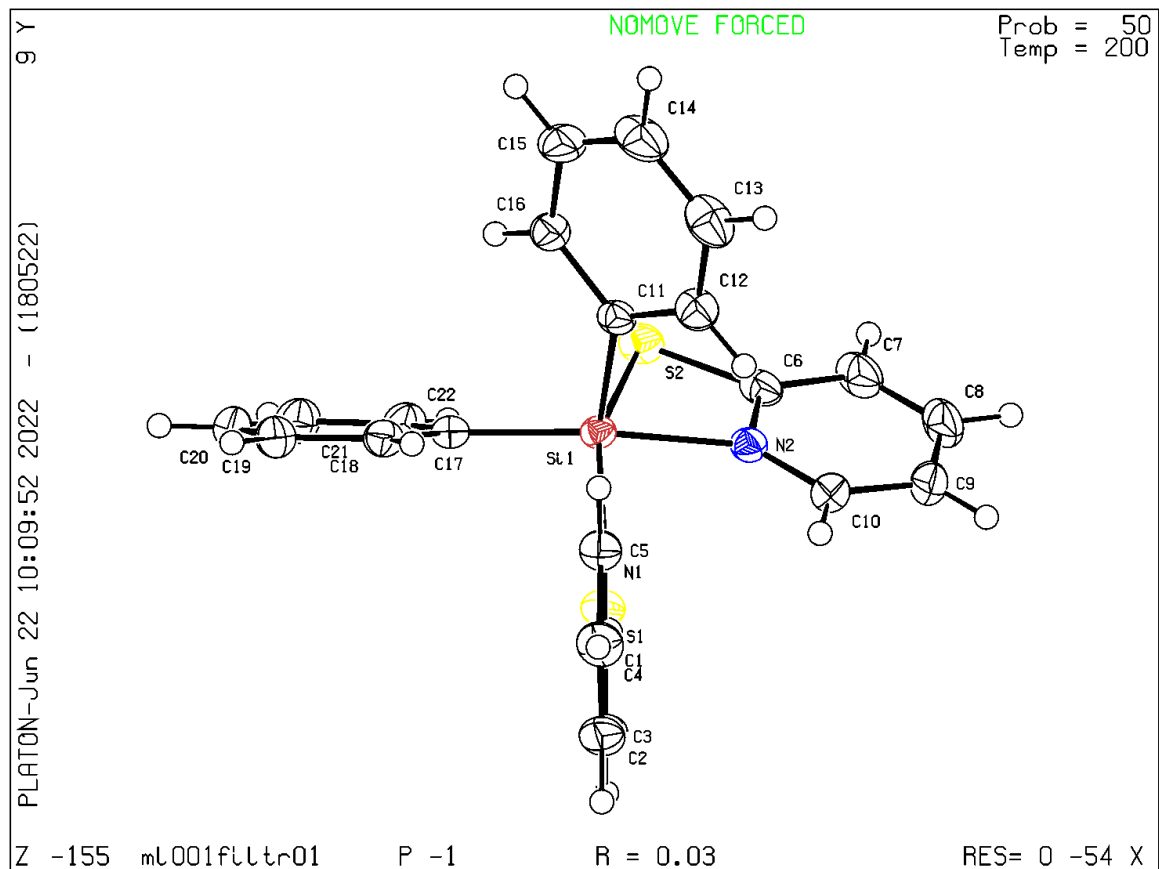

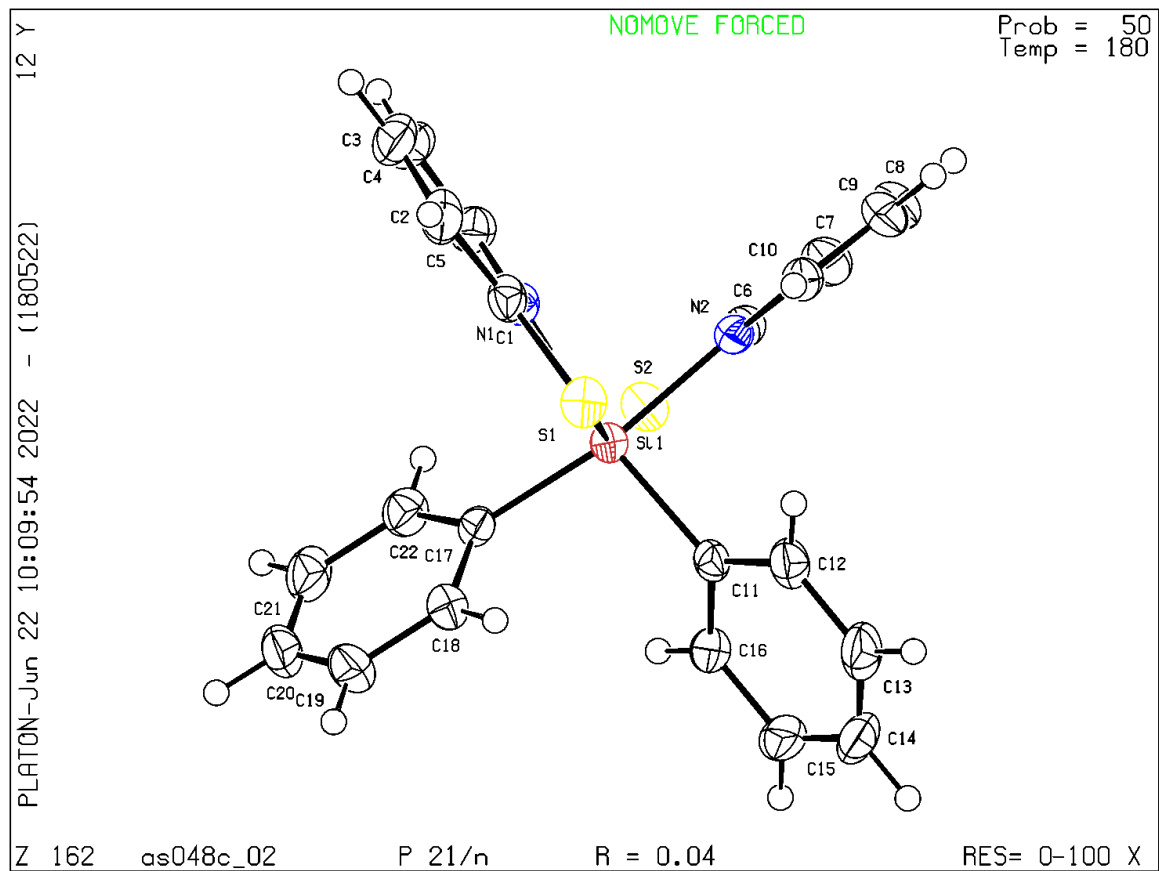

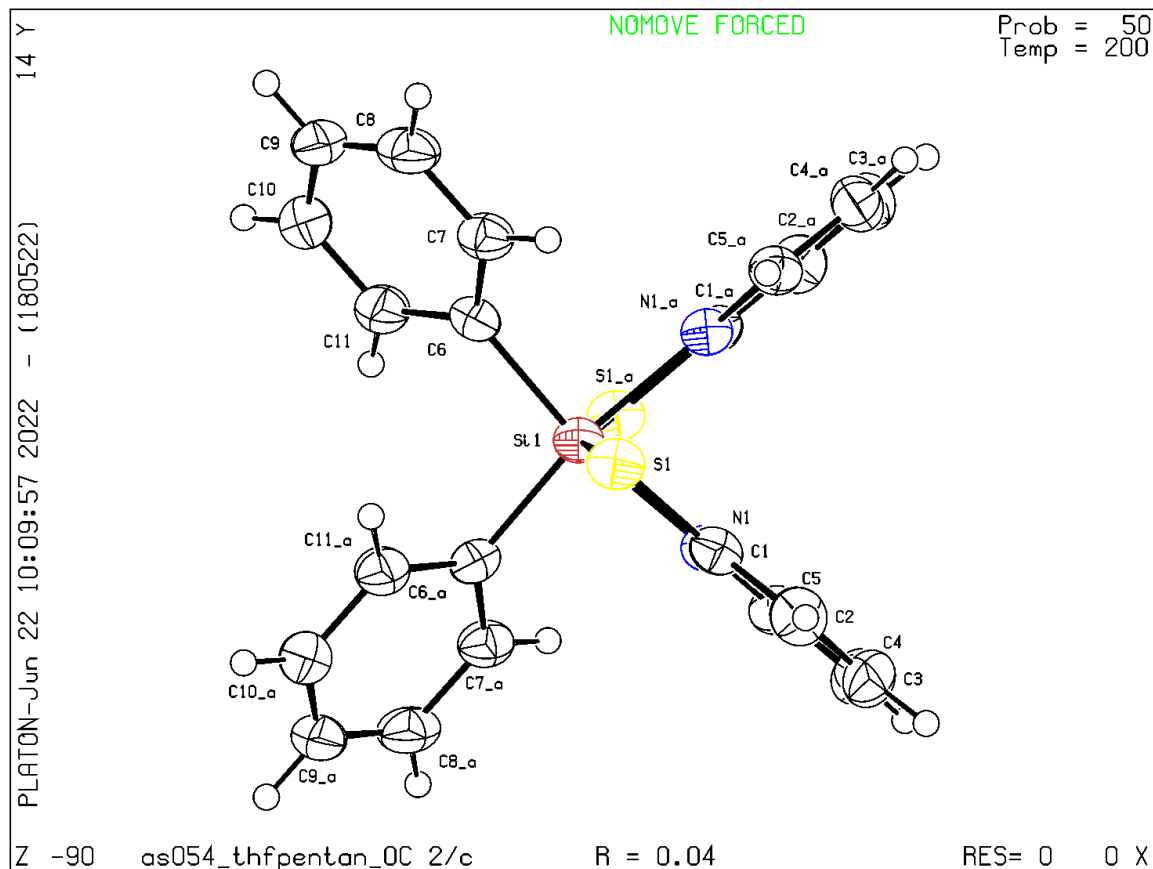

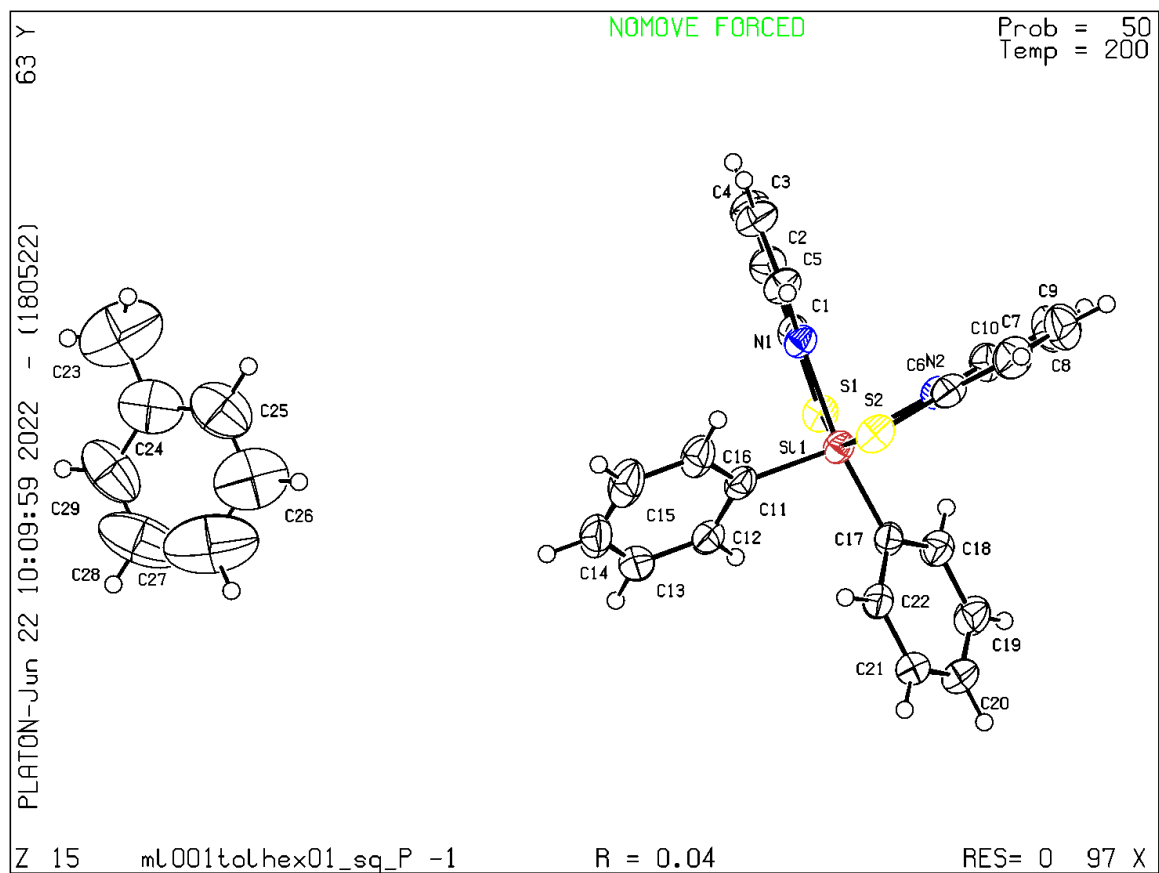

Supplement: s1 [file s1]
