# Supplementary material for: Molecular Structures of the Silicon Pyridine-2-(thi)olates Me3Si(pyX), Me2Si(pyX)2 and Ph2Si(pyX)2 (py = 2-Pyridyl, X = O, S), and Their Intra- and Intermolecular Ligand Exchange in Solution
Source: MDPI journal article supplement (doi:10.3390/cryst12081054), 2022-07-28
Supplement: s1 [file s1]

Supporting information for:

**Molecular Structures of the Silicon Pyridine-2-(thi)olates  $\text{Me}_3\text{Si}(\text{pyX})$ ,  $\text{Me}_2\text{Si}(\text{pyX})_2$  and  $\text{Ph}_2\text{Si}(\text{pyX})_2$  (py = 2-Pyridyl, X = O, S), and their Intra- and Intermolecular Ligand Exchange in Solution**

Anne Seidel <sup>1</sup>, Mareike Weigel <sup>1</sup>, Lisa Ehrlich <sup>1</sup>, Robert Gericke <sup>1,2</sup>, Erica Brendler <sup>3</sup> and Jörg

Wagler <sup>1</sup>

<sup>1</sup> Technische Universität Bergakademie Freiberg, Institut für Anorganische Chemie, Leipziger Straße 29, 09596 Freiberg, Germany

<sup>2</sup> Helmholtz-Zentrum Dresden-Rossendorf e.V., Institute of Resource Ecology, Bautzner Landstraße 400, 01328 Dresden, Germany

<sup>3</sup> Technische Universität Bergakademie Freiberg, Institut für Analytische Chemie, Leipziger Straße 29, 09596 Freiberg, Germany

# Contents

NMR spectra ( $^1\text{H}$ ,  $^{13}\text{C}$ ,  $^{29}\text{Si}$ ) of  $\text{CDCl}_3$  solutions of compounds **2a** (Figures S1 – S3), **2b** (Figures S4 – S6), **3a** (Figures S7 – S9) and **3b** (Figures S10 – S12)

$^{29}\text{Si}$  CP/MAS NMR spectra of **3a**<sup>1</sup> (Figure S13) and **3a**<sup>2</sup>(modification 1) (Figure S14)

NMR spectra ( $^{29}\text{Si}$ ) of  $\text{CDCl}_3$  solutions of mixtures of **2a+2b** (Figure S15) and of **3a+3b** (Figure S16).

X-ray powder diffraction diagrams of compounds **3b**<sup>1</sup> and **3b**<sup>2</sup>(modification 1) (Figure S17)

Graphical representations of the shapes of Si coordination polyhedral of **3b**<sup>1</sup> and **3b**<sup>2</sup>(modification 1) (Figure S18)

Sets of graphical representation, total energies in a.u. (PBE0: final single point energy and final Gibbs free energy; B2T-PLYP: final single point energy) and atomic coordinates of optimized molecular structures of  $\text{Me}_3\text{Si}(\text{pyO})$  (**1a**) and  $\text{Me}_3\text{Si}(\text{pyS})$  (**1b**) (Figures S19 – S26, Tables S1 – S8) and of  $\text{Me}_2\text{Si}(\text{pyO})_2$  (**2a**),  $\text{Me}_2\text{Si}(\text{pyS})_2$  (**2b**) and  $\text{Me}_2\text{Si}(\text{pyO})(\text{pyS})$  (**2c**) (Figures S27 – S59, Tables S9 – S41).

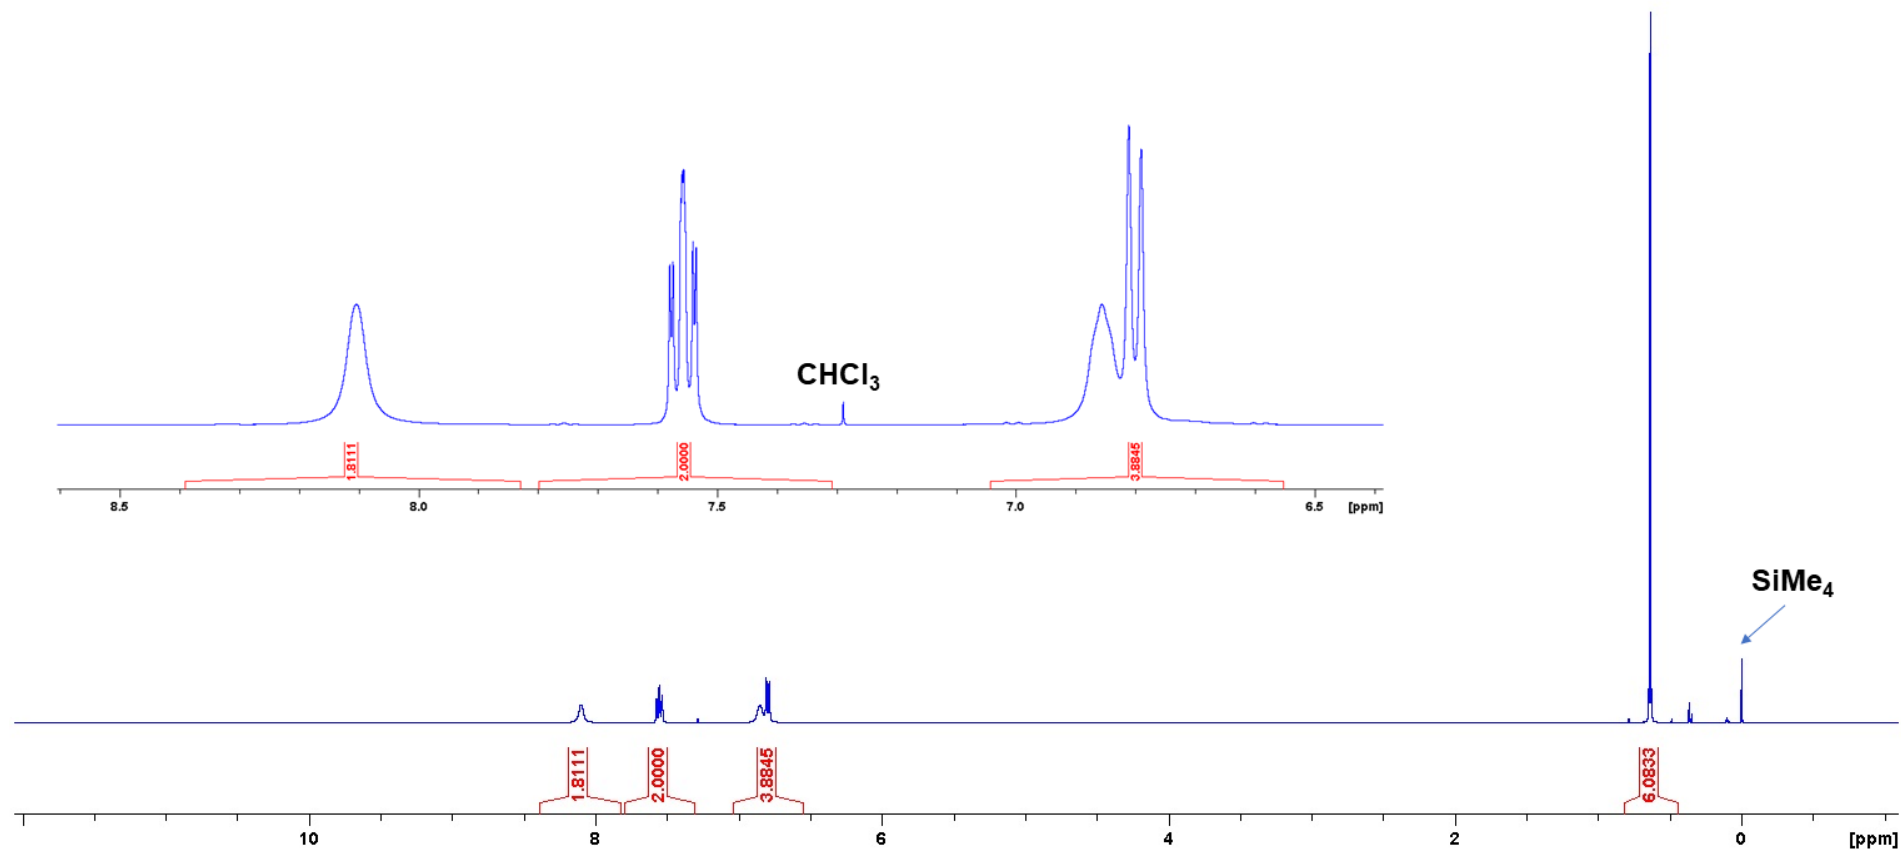

**Figure S1.**  $^1\text{H}$  NMR spectrum of **2a** in  $\text{CDCl}_3$  (full spectrum and magnified inset of group of signals).

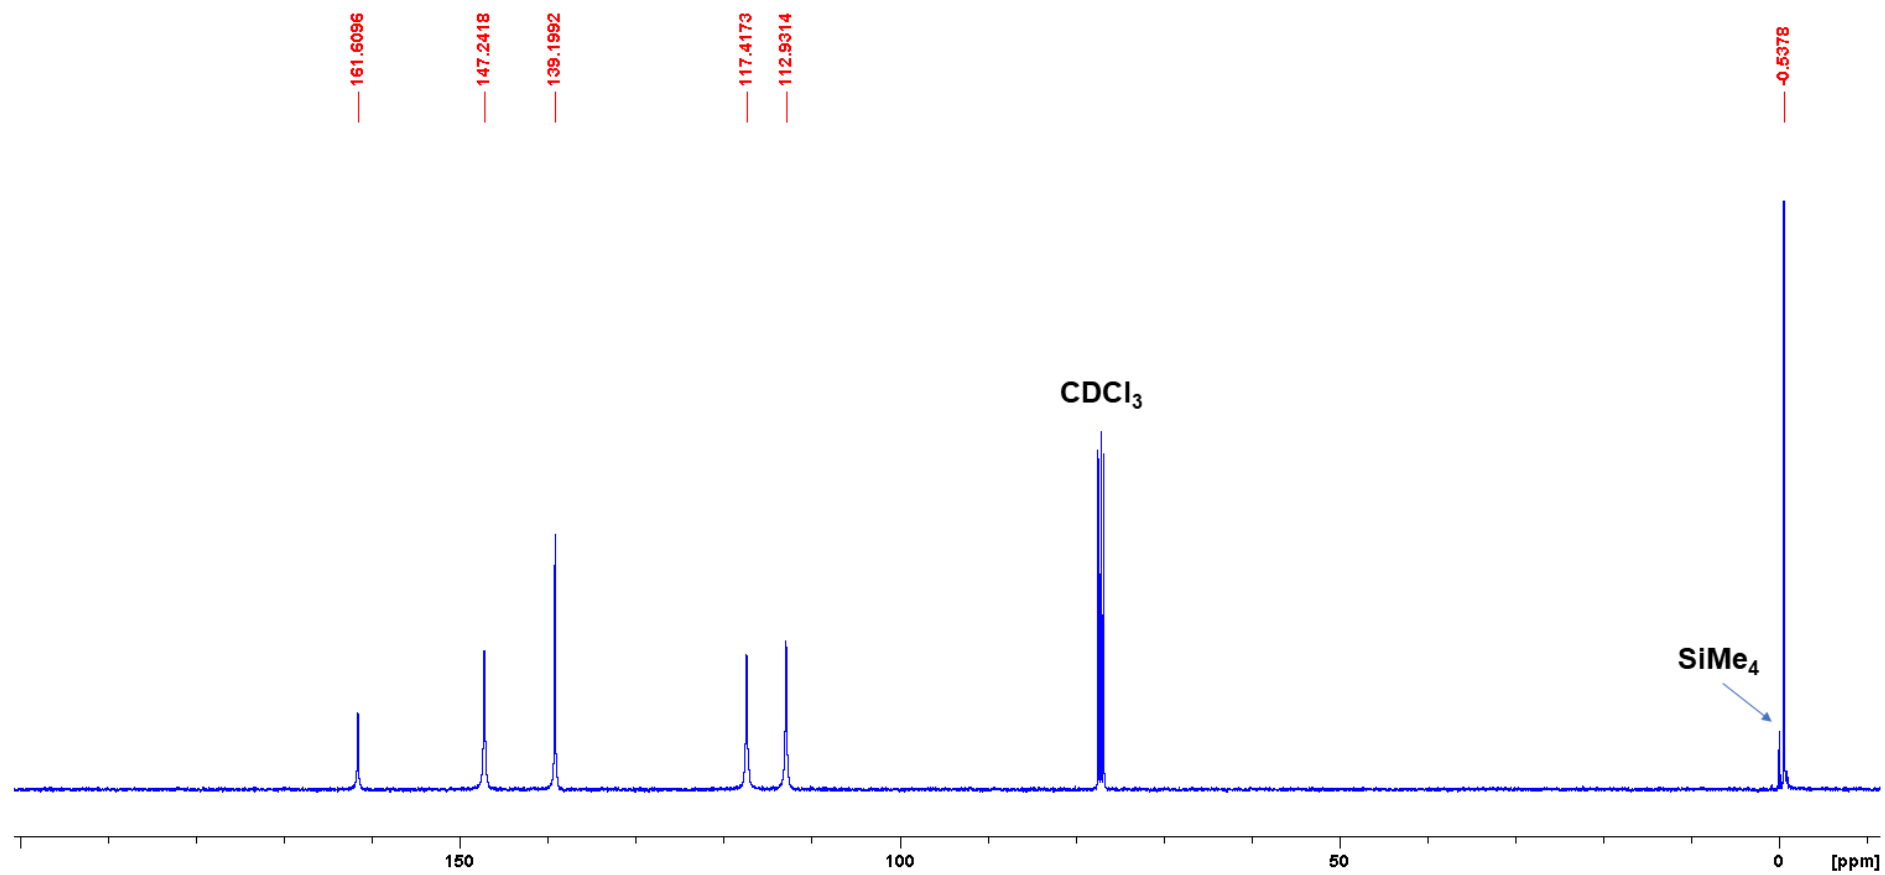

**Figure S2.**  $^{13}\text{C}\{^1\text{H}\}$  NMR spectrum of **2a** in  $\text{CDCl}_3$ .

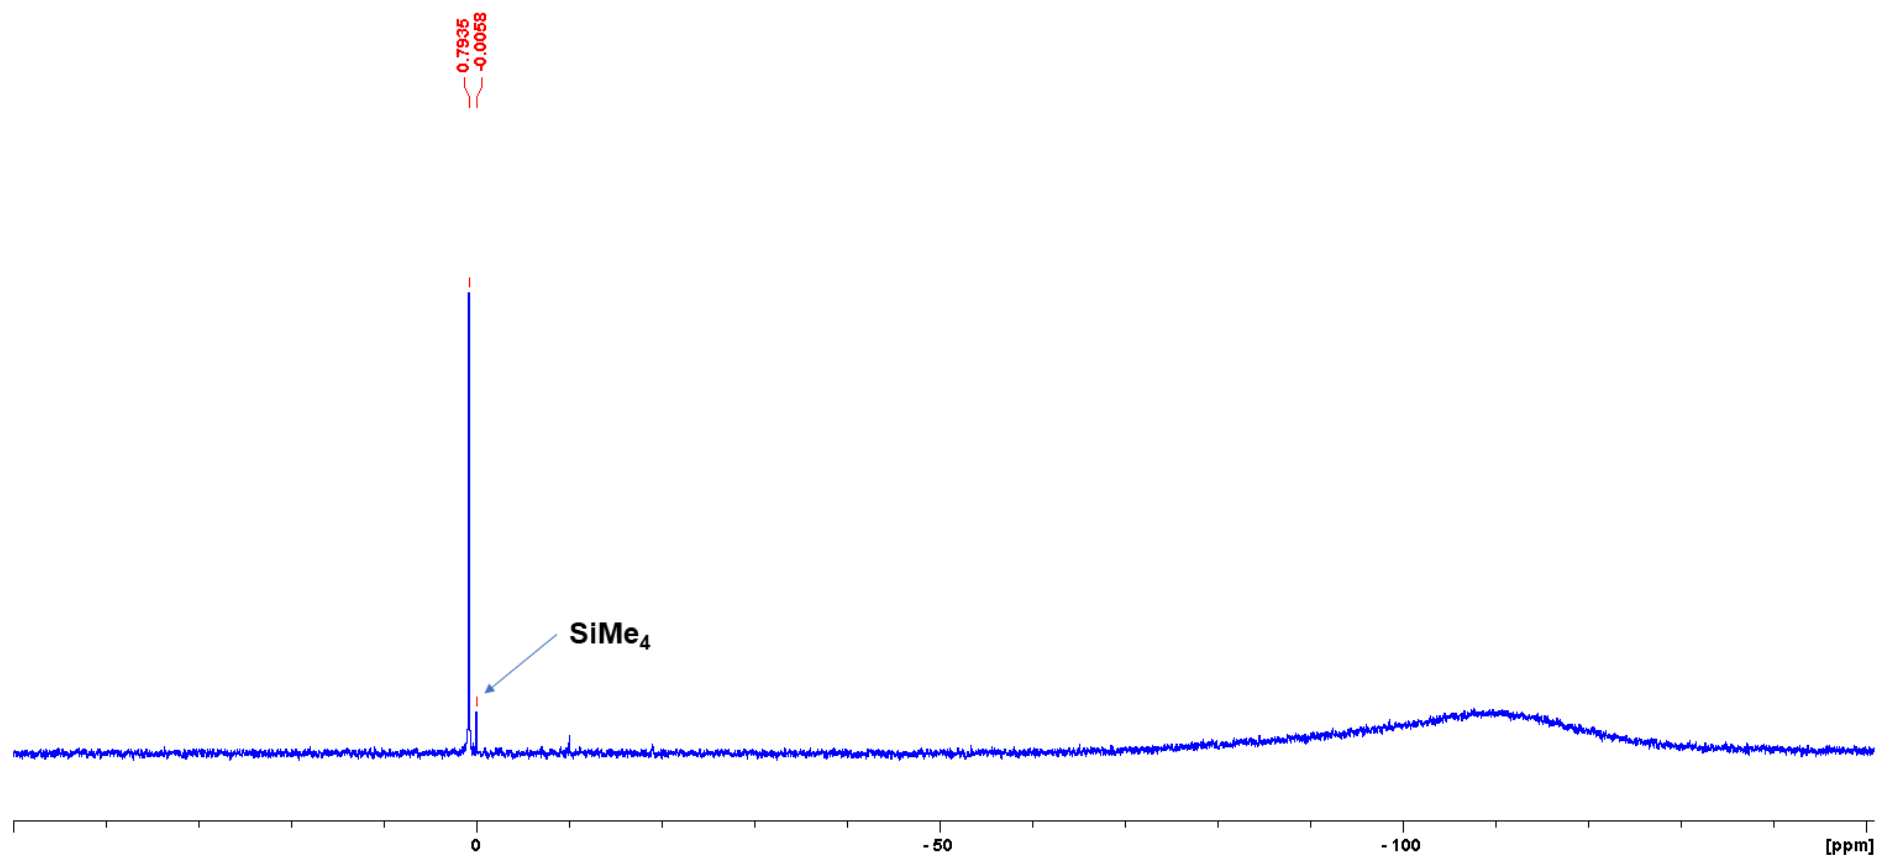

**Figure S3.**  $^{29}\text{Si}\{^1\text{H}\}$  NMR spectrum of **2a** in  $\text{CDCl}_3$ .

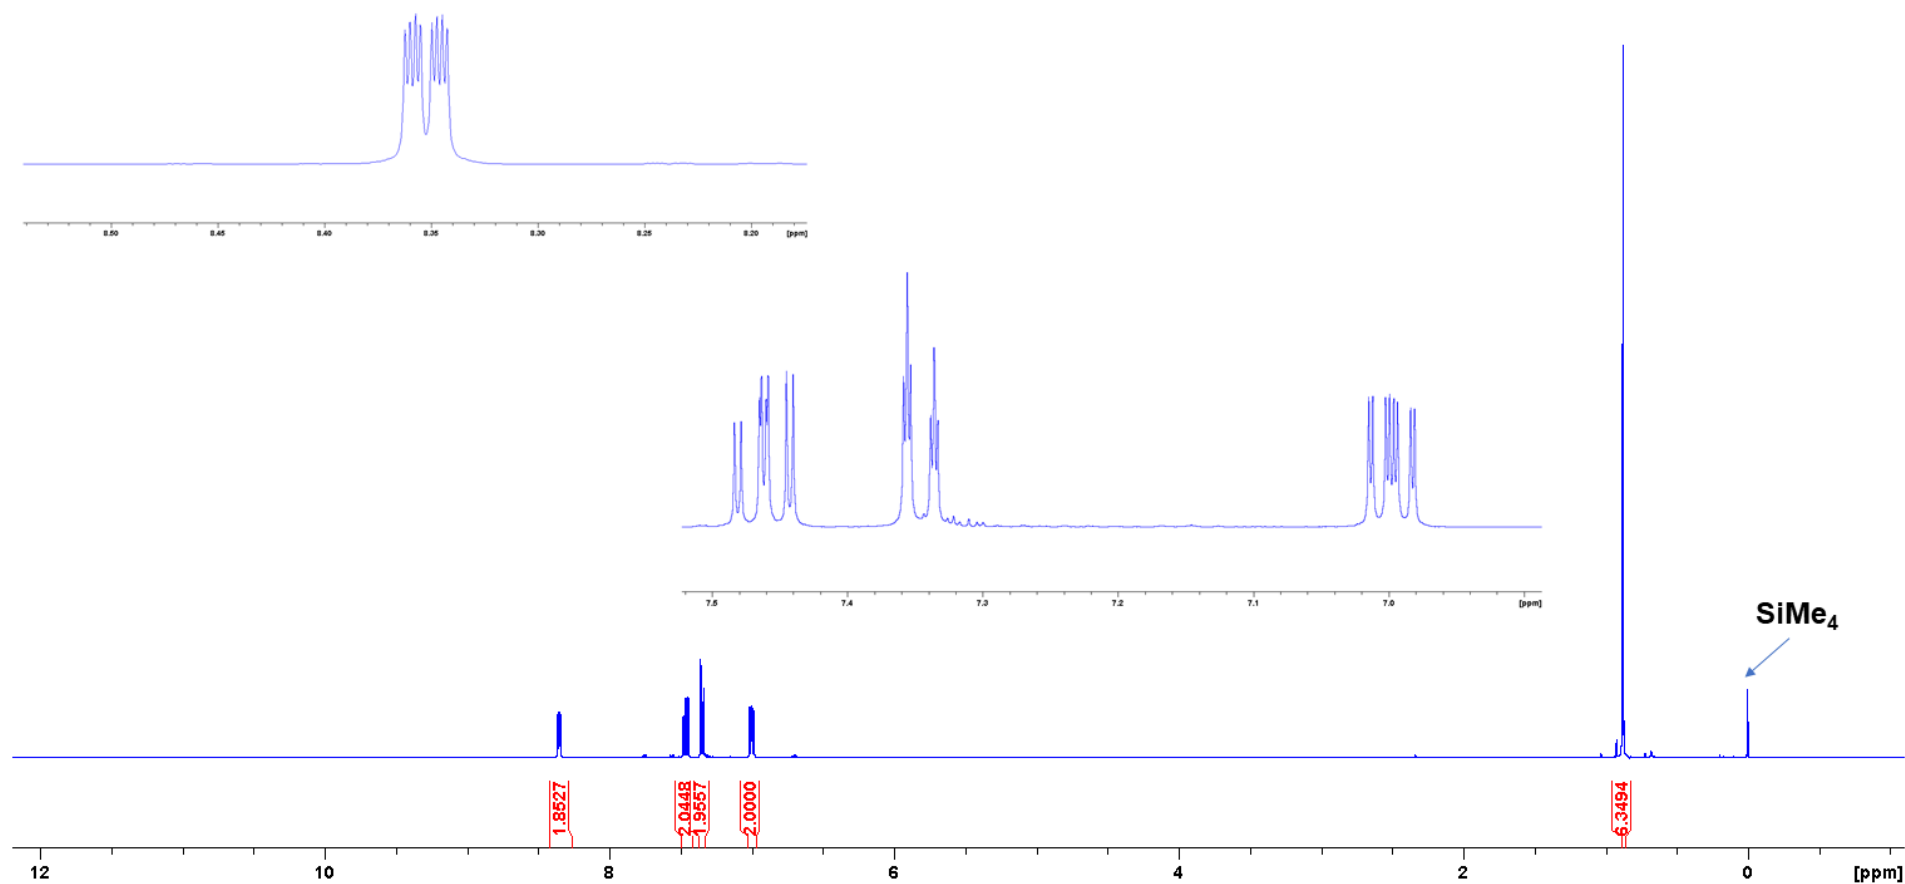

**Figure S4.**  $^1\text{H}$  NMR spectrum of **2b** in  $\text{CDCl}_3$  (full spectrum and magnified insets of group of signals).

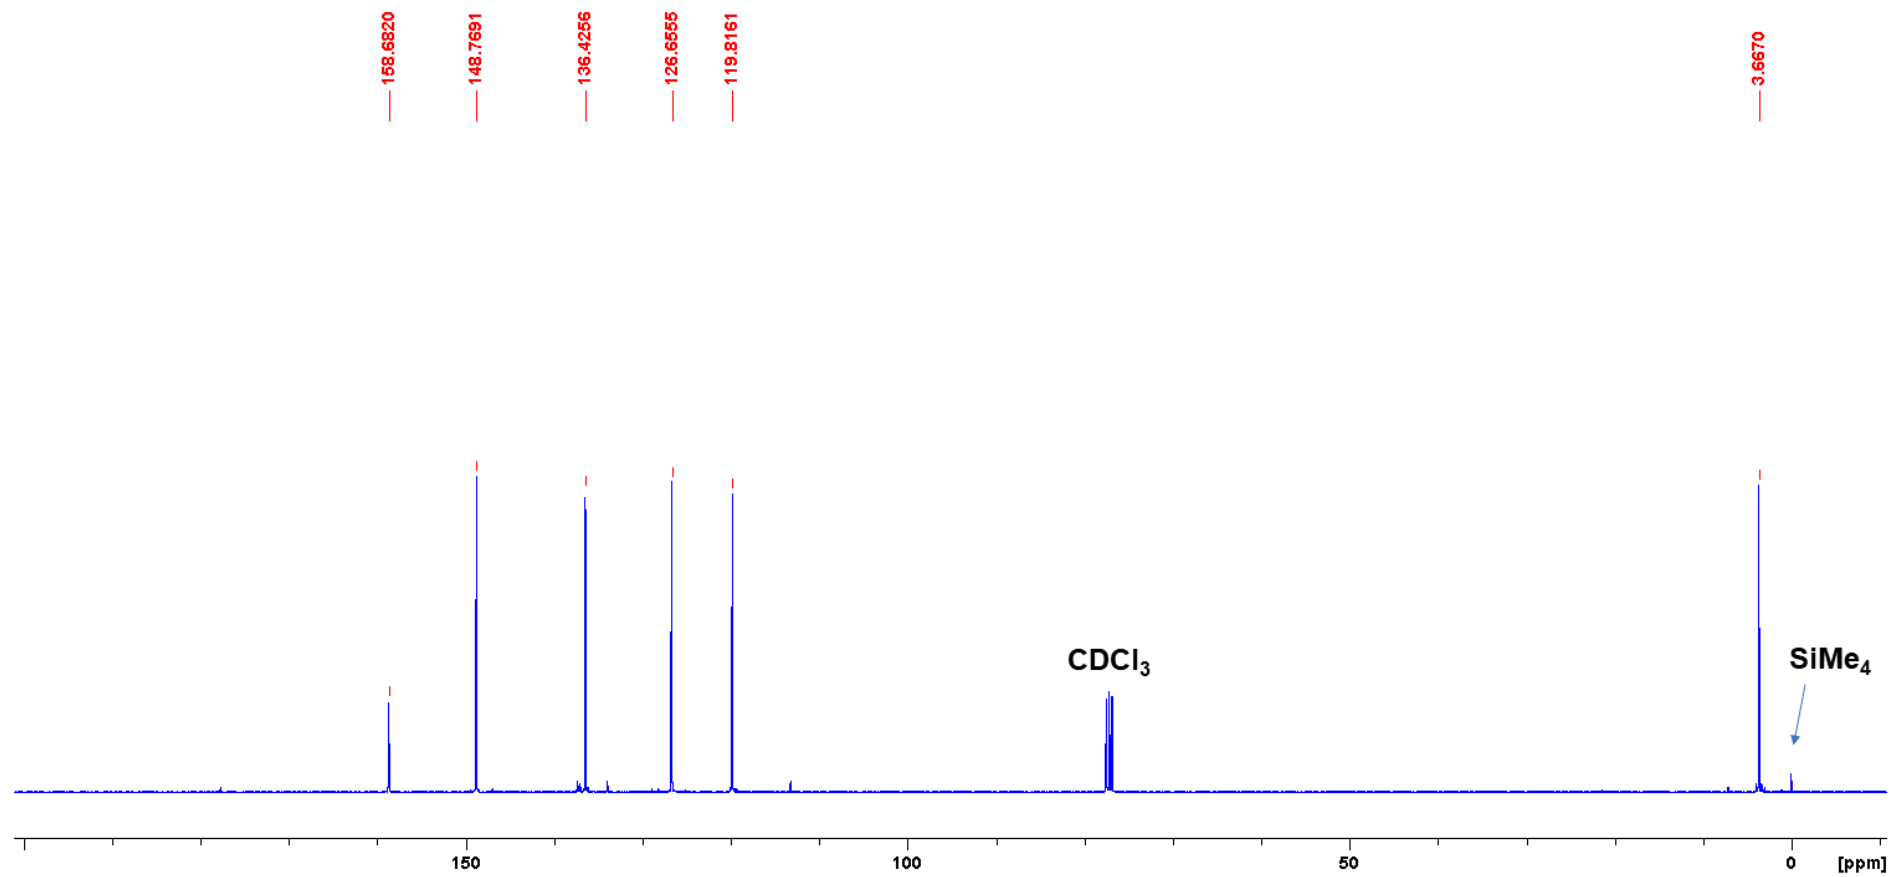

**Figure S5.** <sup>13</sup>C{<sup>1</sup>H} NMR spectrum of **2b** in CDCl<sub>3</sub>.

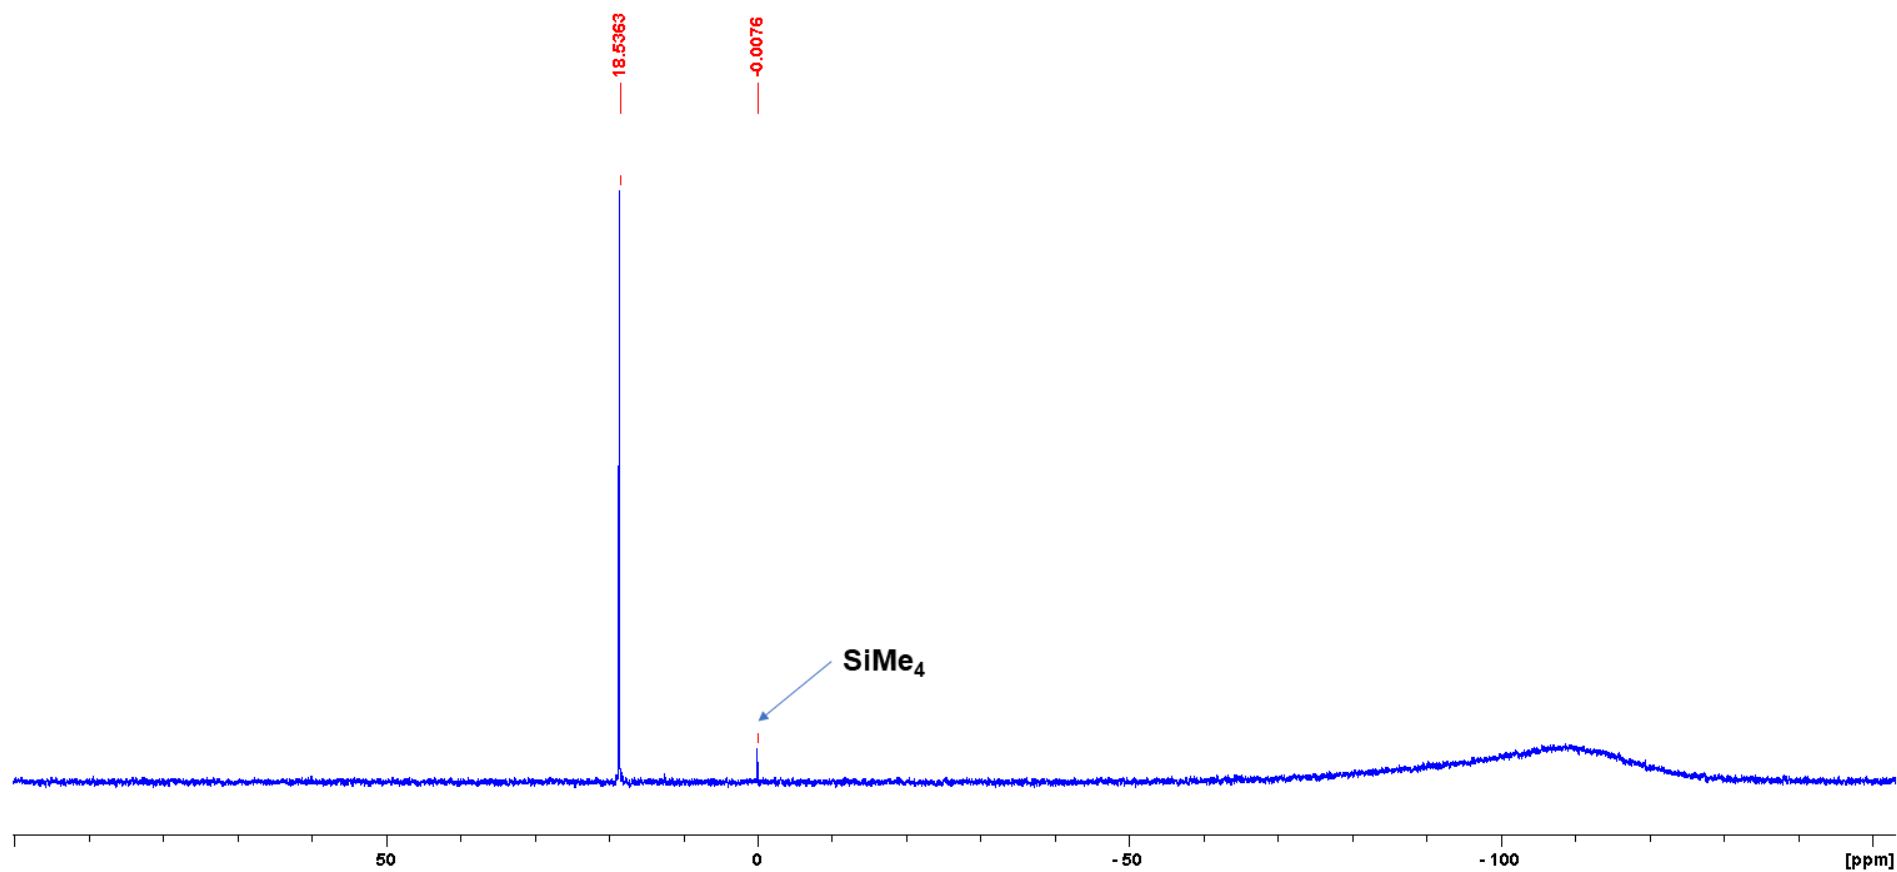

**Figure S6.**  $^{29}\text{Si}\{^1\text{H}\}$  NMR spectrum of **2b** in  $\text{CDCl}_3$ .



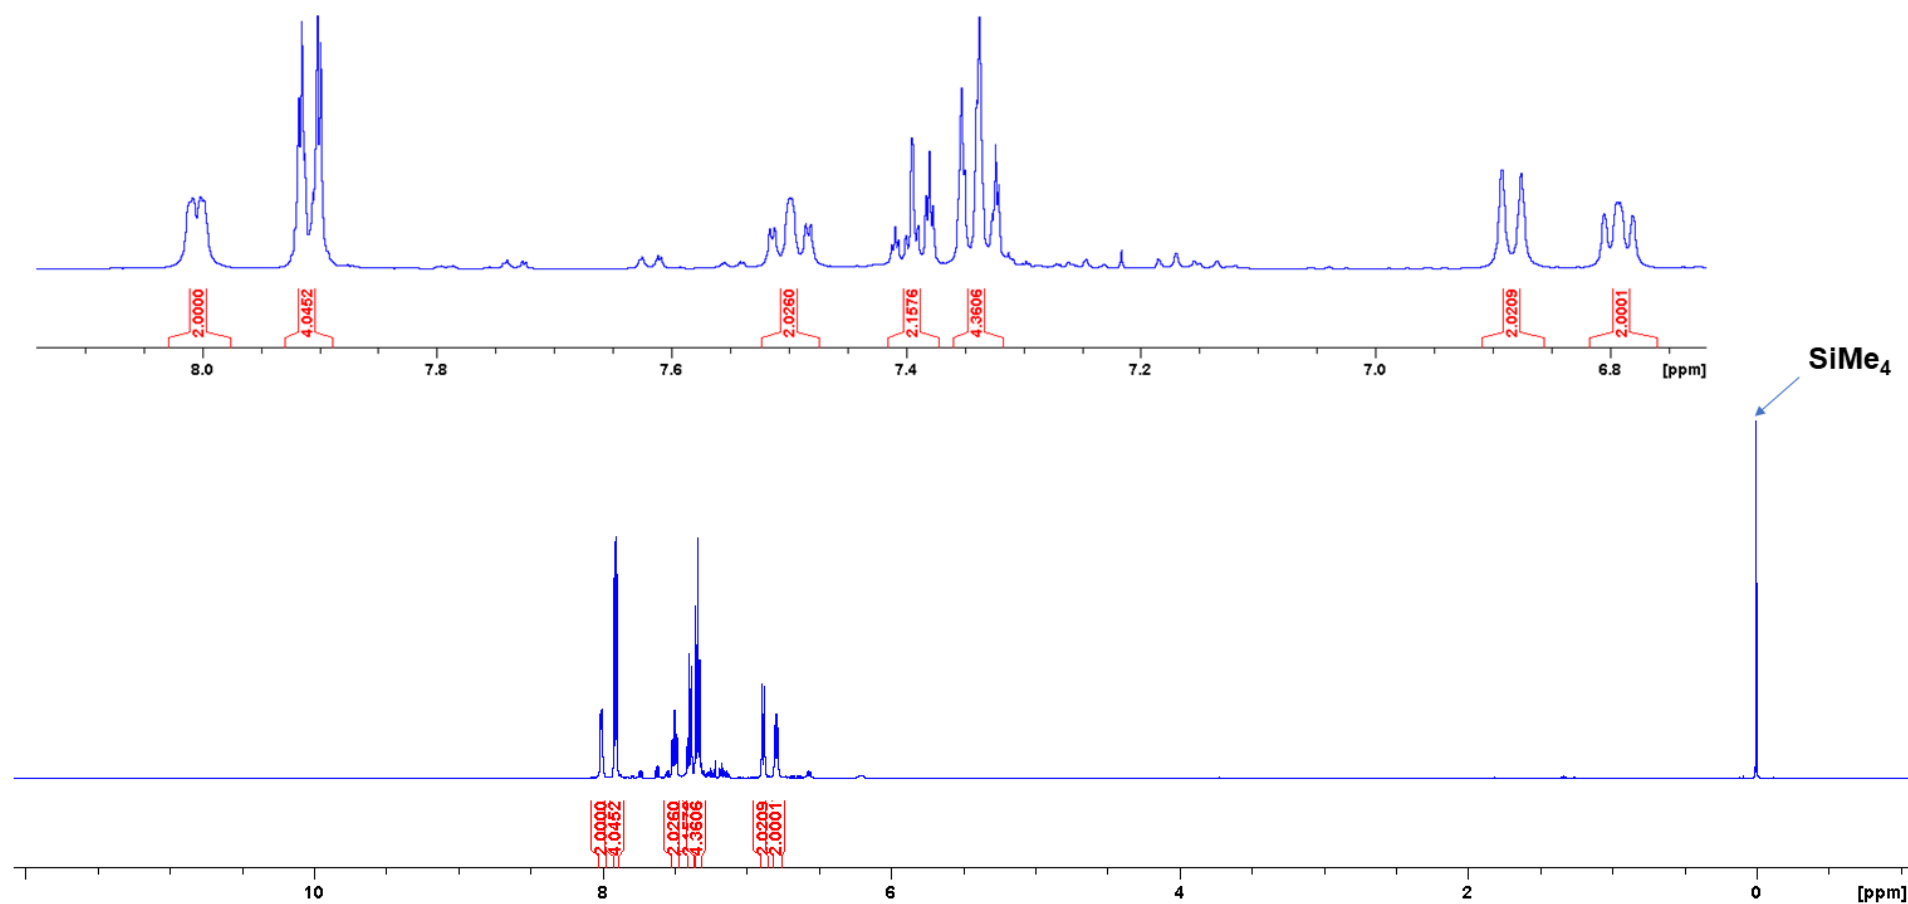

**Figure S7.**  $^1\text{H}$  NMR spectrum of **3a** in  $\text{CDCl}_3$  (full spectrum and magnified insets of group of signals).

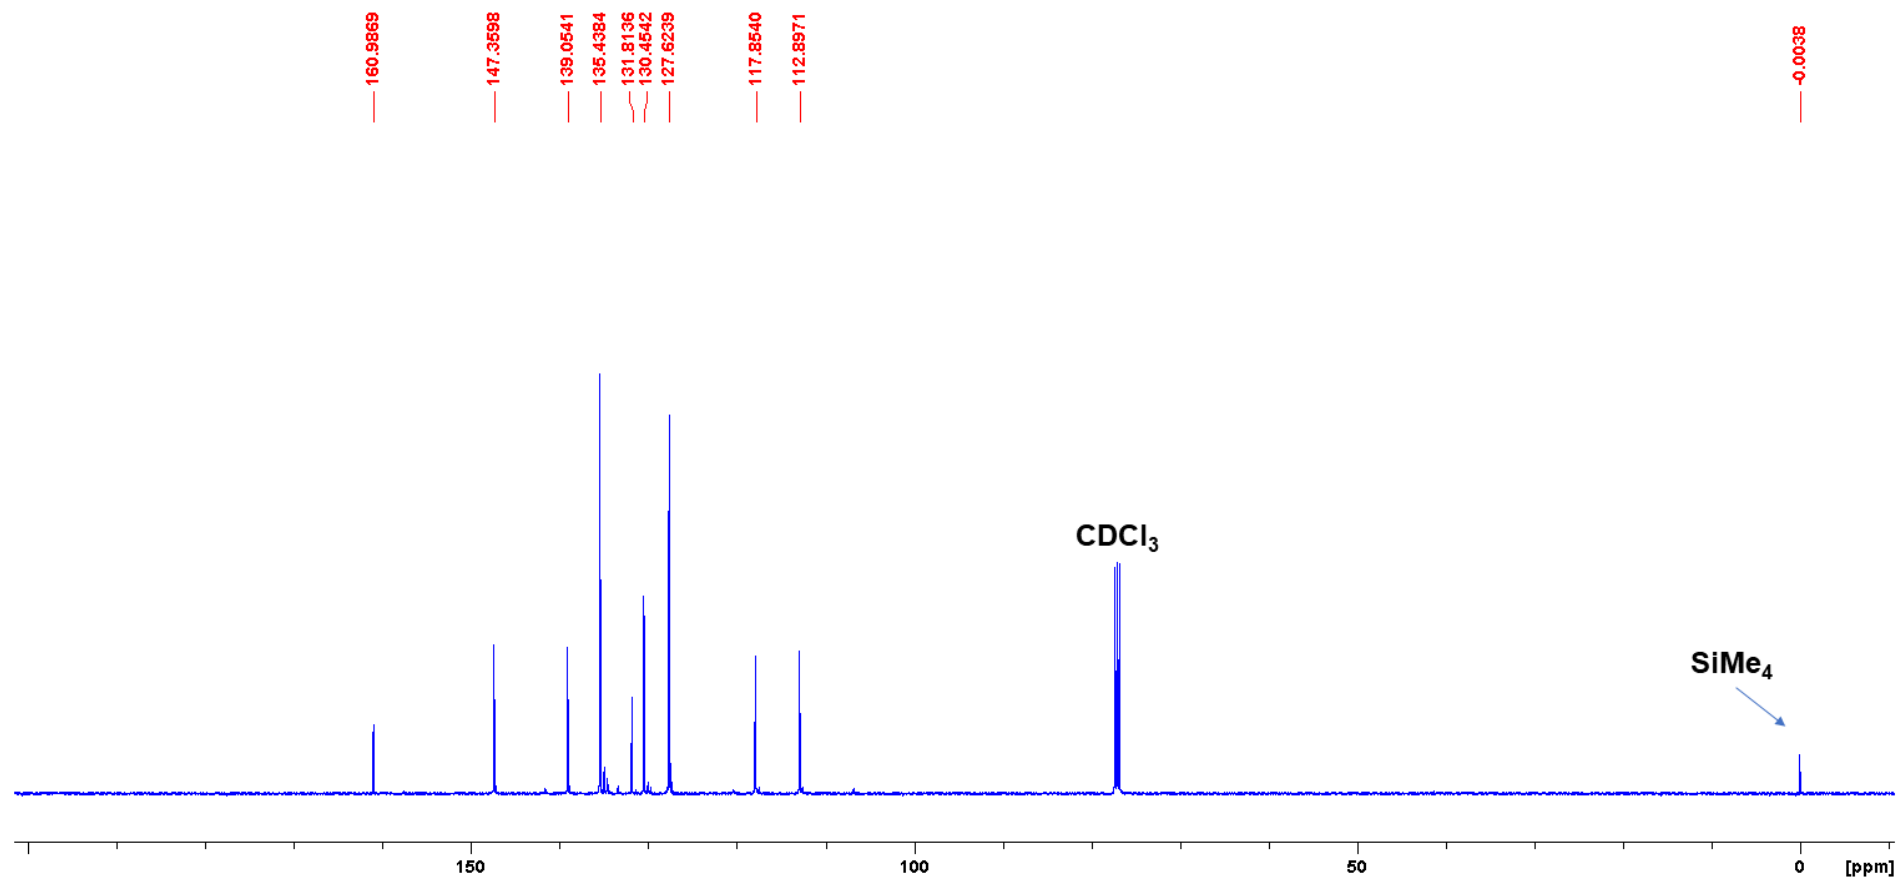

**Figure S8.** <sup>13</sup>C{<sup>1</sup>H} NMR spectrum of **3a** in CDCl<sub>3</sub>.

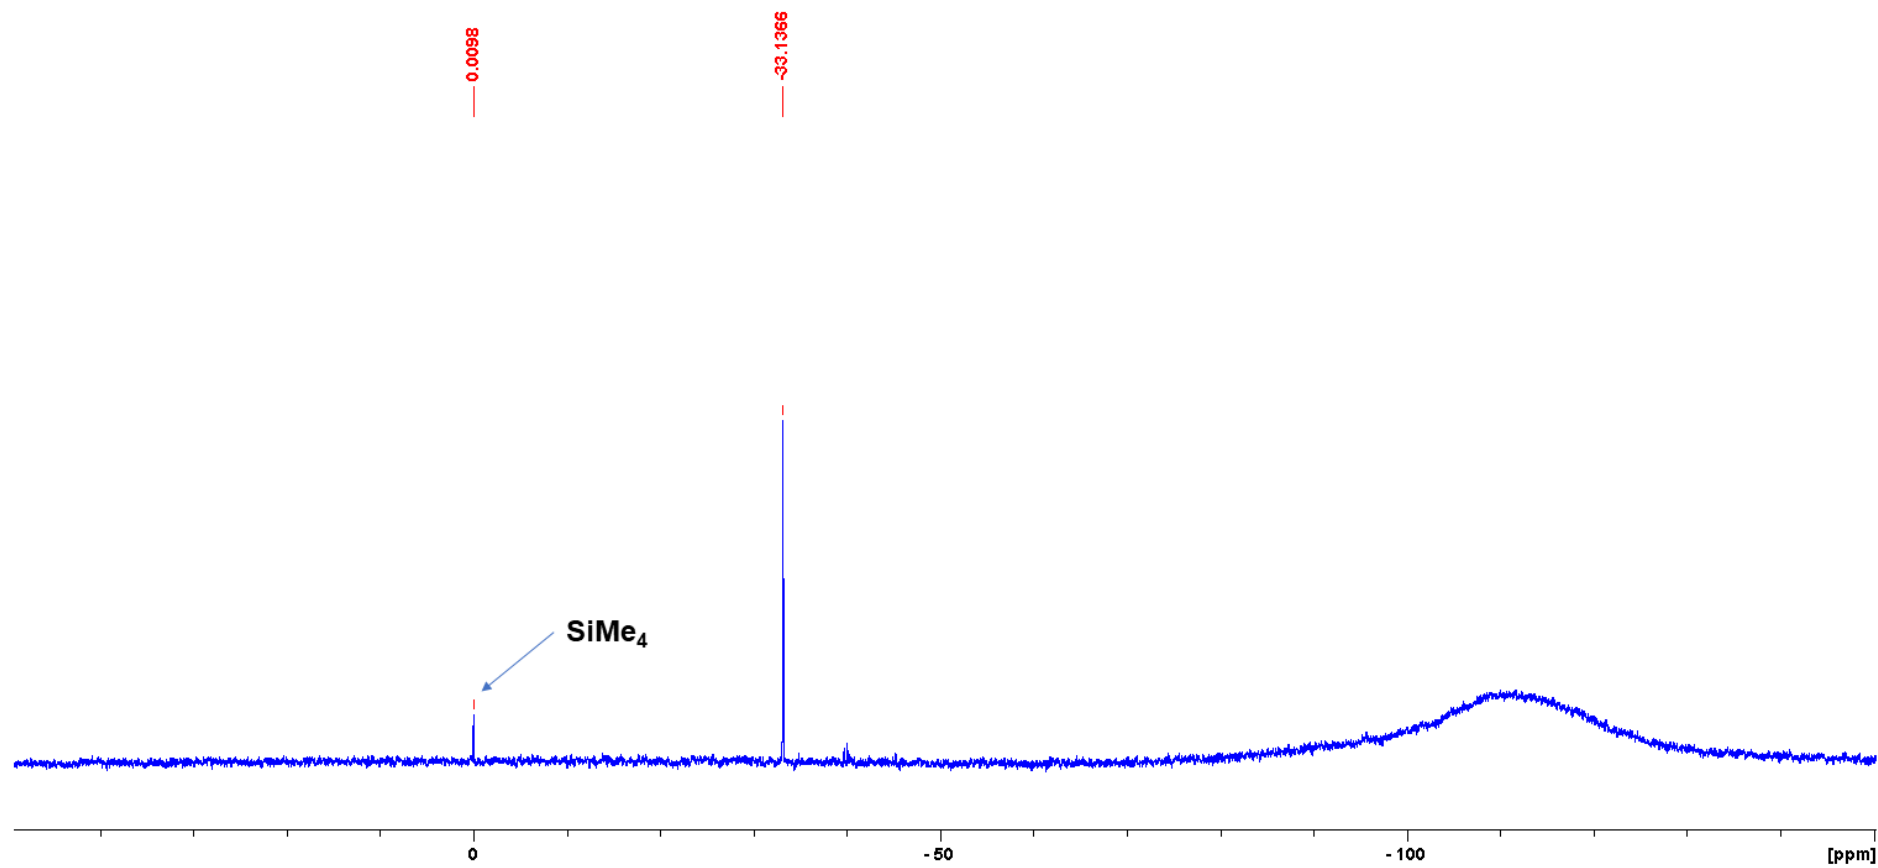

**Figure S9.**  $^{29}\text{Si}\{^1\text{H}\}$  NMR spectrum of **3a** in  $\text{CDCl}_3$ .

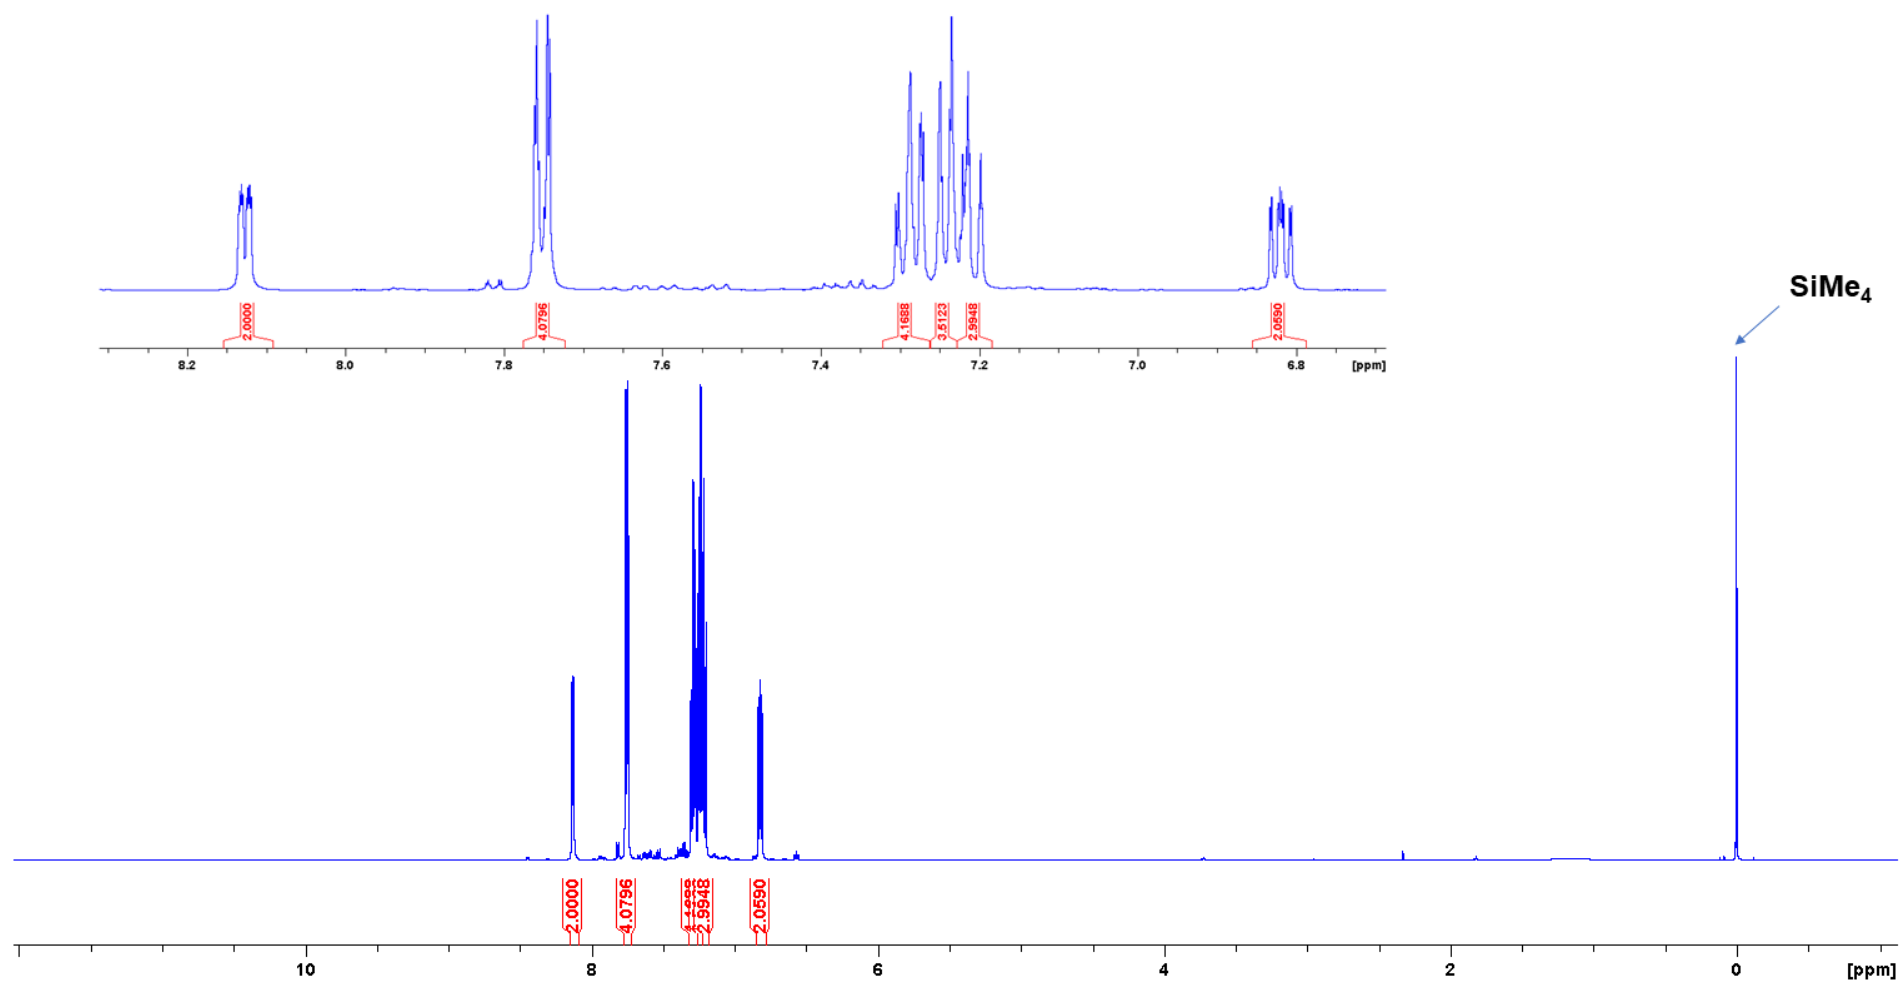

**Figure S10.**  $^1\text{H}$  NMR spectrum of **3b** in  $\text{CDCl}_3$  (full spectrum and magnified inset of group of signals).

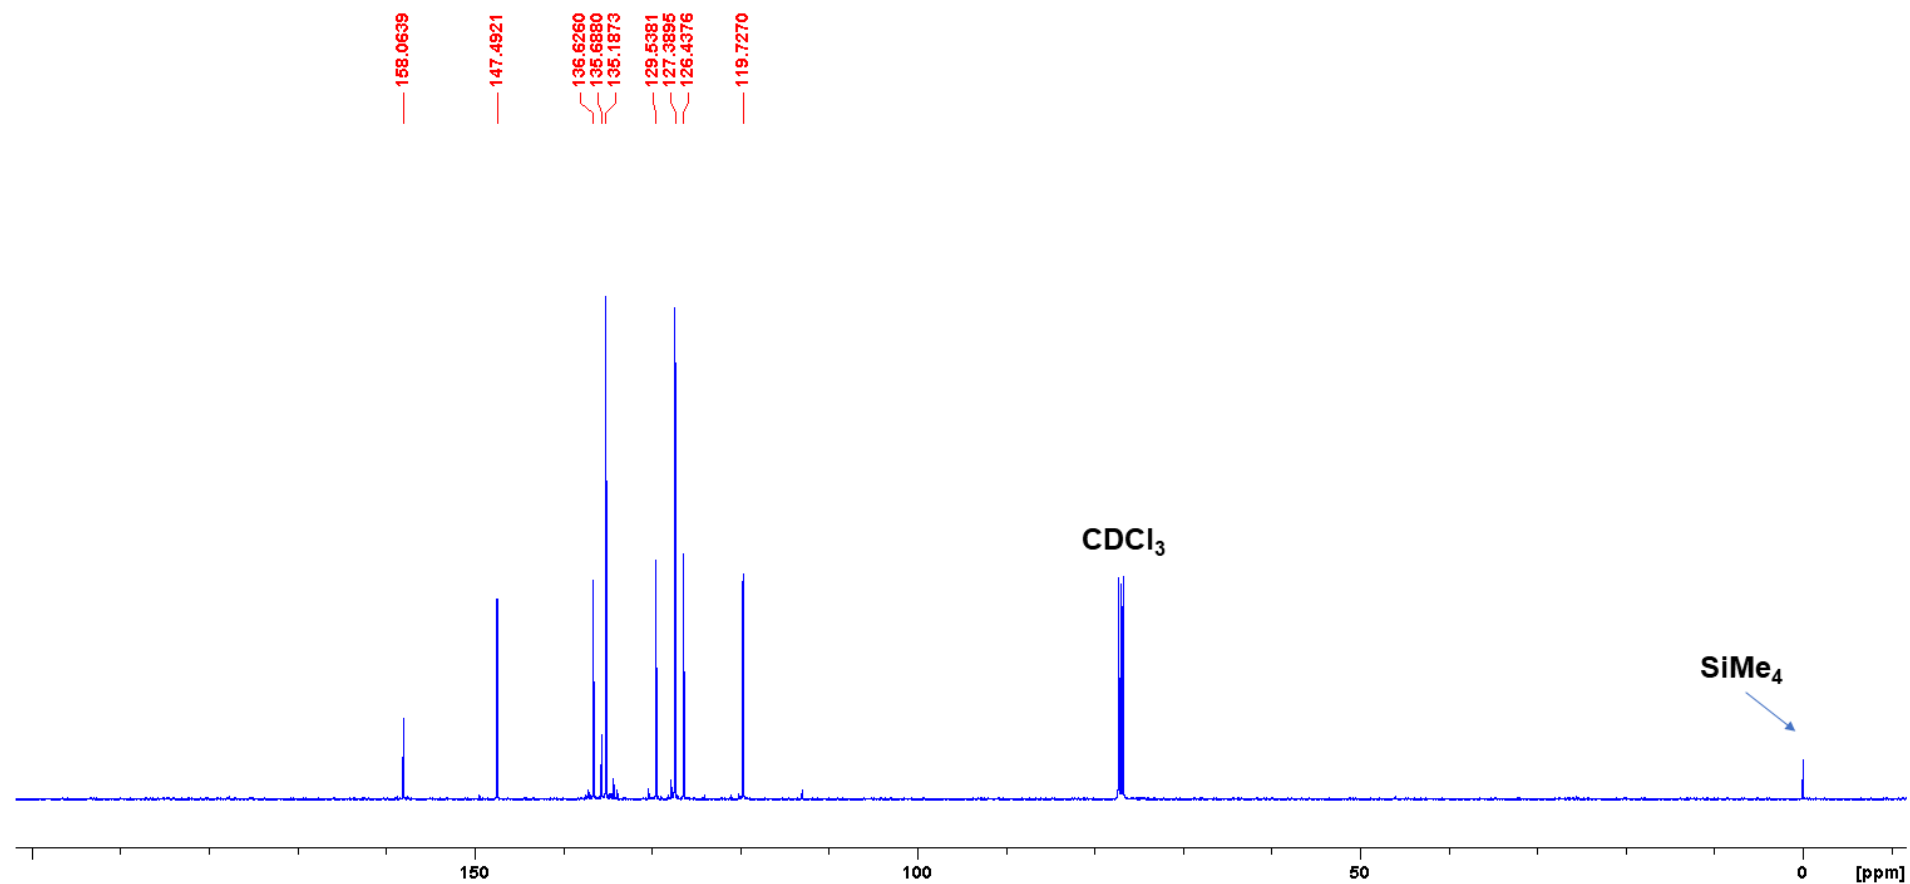

**Figure S11.** <sup>13</sup>C{<sup>1</sup>H} NMR spectrum of **3b** in CDCl<sub>3</sub>.

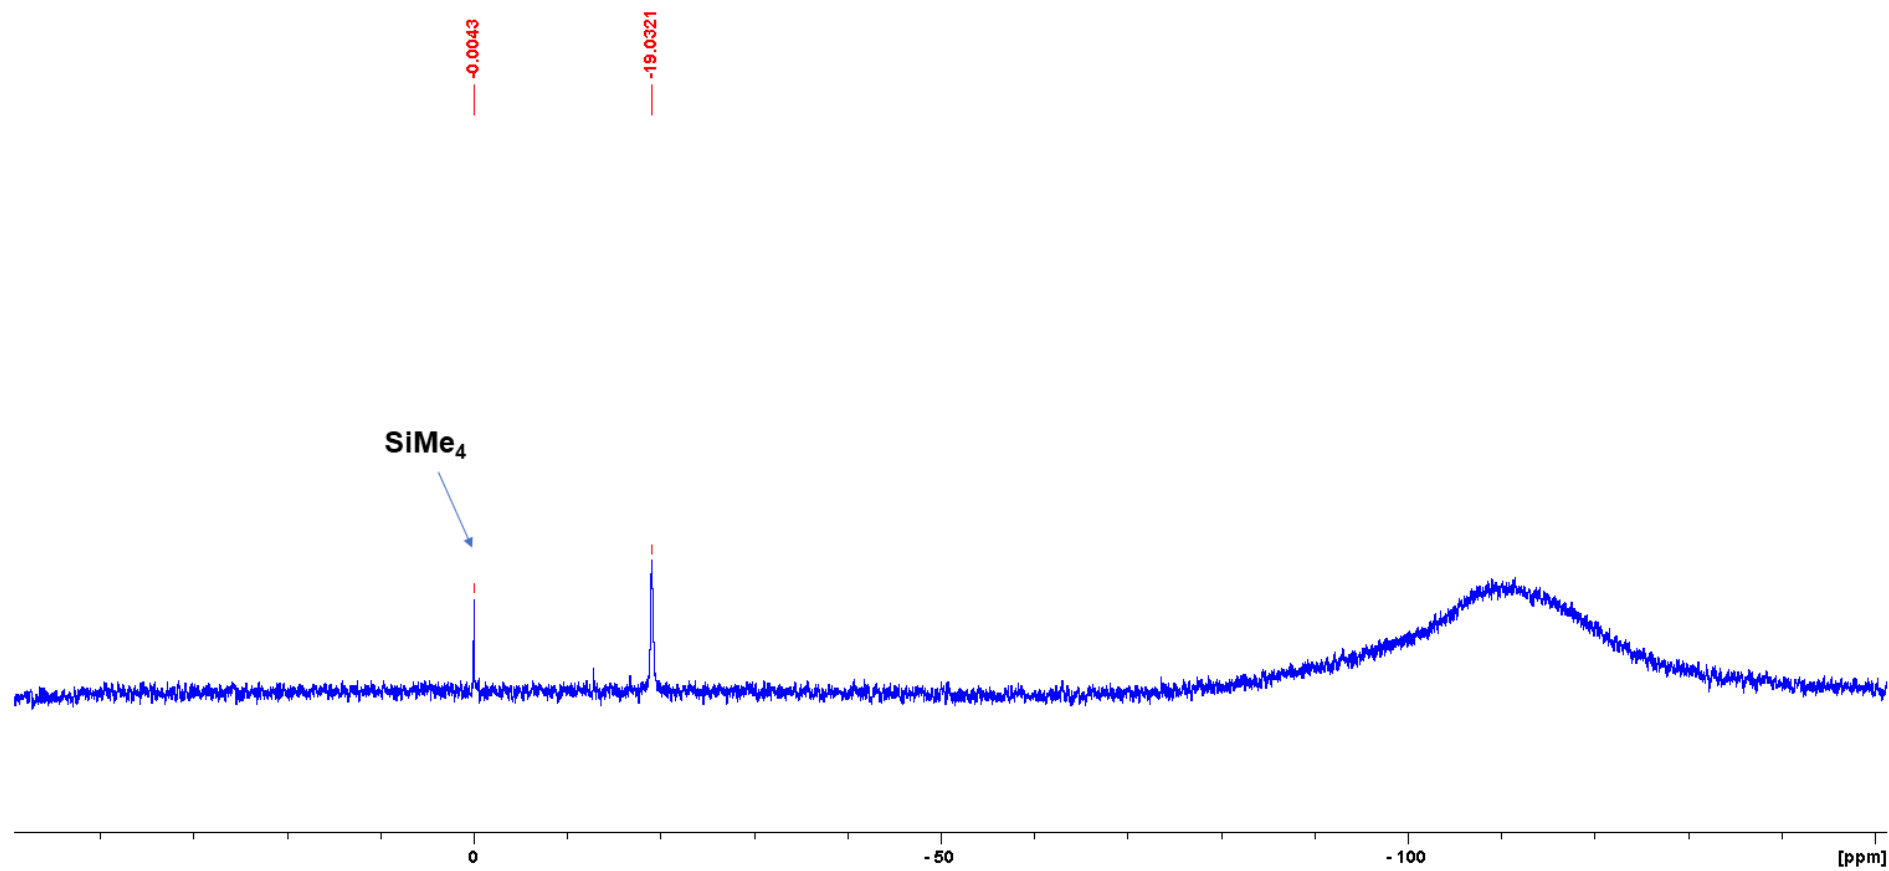

**Figure S12.**  $^{29}\text{Si}\{^1\text{H}\}$  NMR spectrum of **3b** in  $\text{CDCl}_3$ .

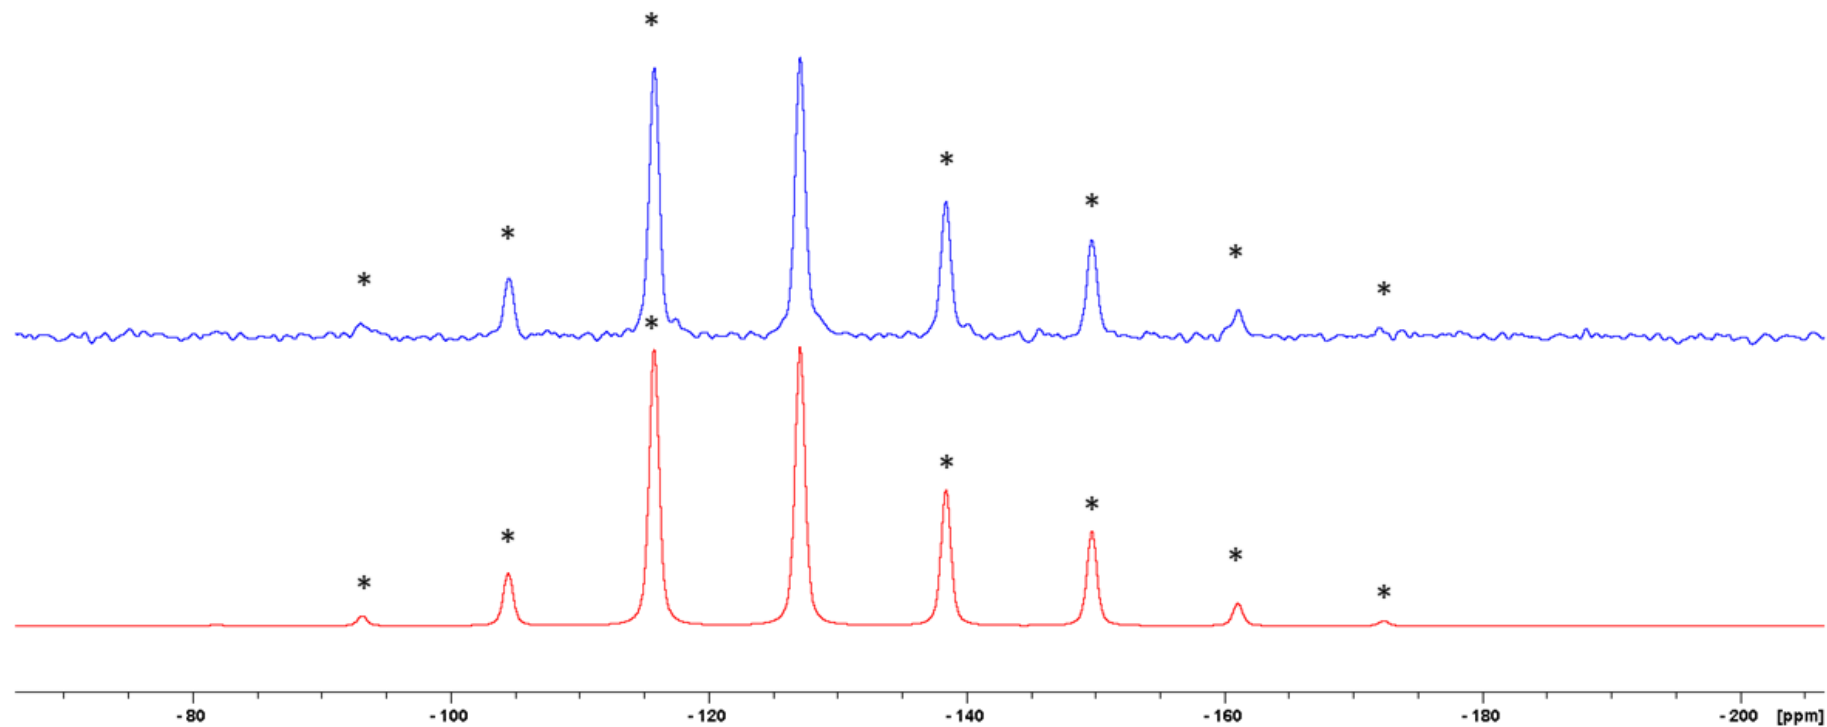

**Figure S13.**  $^{29}\text{Si}$  CP/MAS NMR spectrum of **3b<sup>1</sup>** (MAS frequency 900 Hz, spinning side bands are asterisked) showing the experimental spectrum (top, blue trace) and the spinning side band spectrum simulated from the CSA tensor derived therefrom (bottom, red trace).

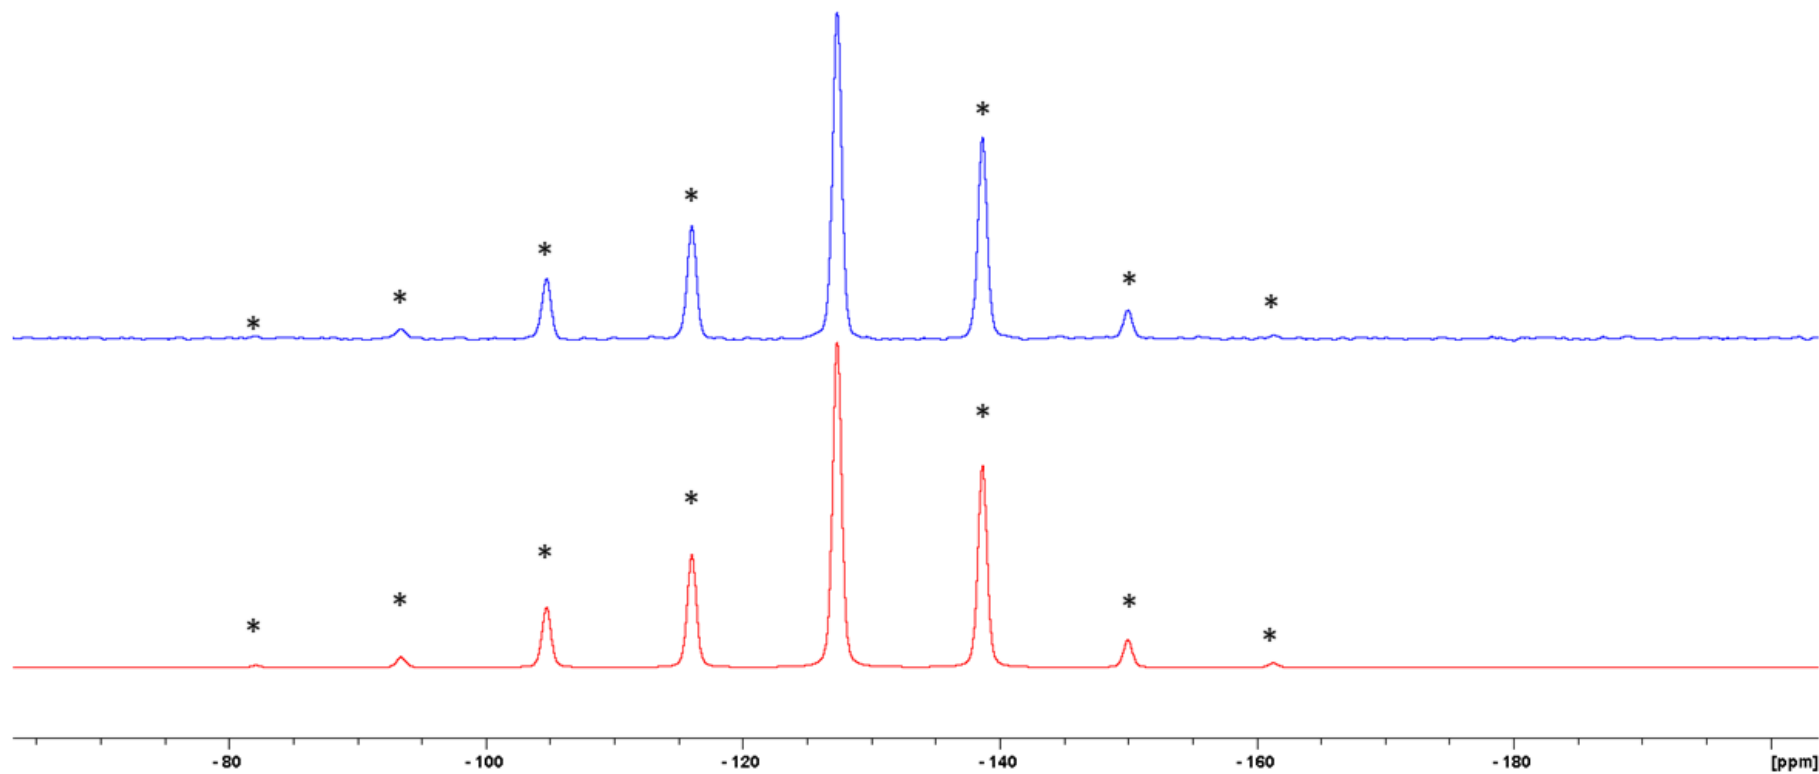

**Figure S14.**  $^{29}\text{Si}$  CP/MAS NMR spectrum of **3b<sup>2</sup>** (MAS frequency 900 Hz, spinning side bands are asterisked) showing the experimental spectrum (top, blue trace) and the spinning side band spectrum simulated from the CSA tensor derived therefrom (bottom, red trace).



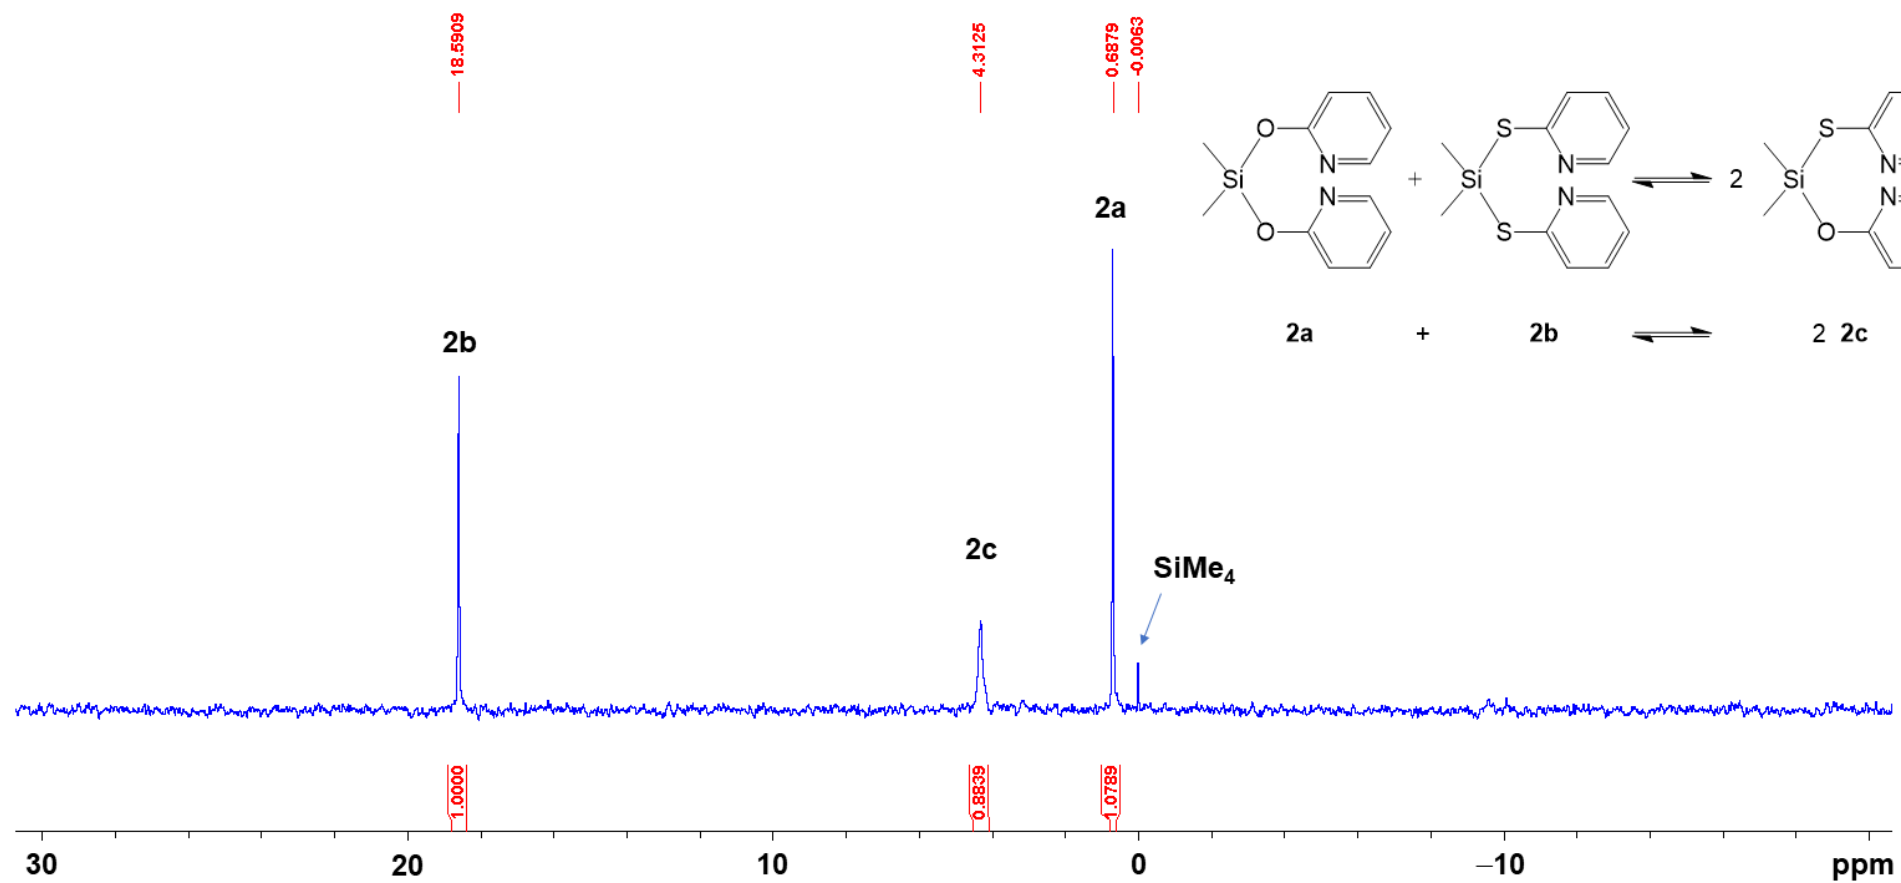

**Figure S15.**  $^{29}\text{Si}\{^1\text{H}\}$  NMR spectrum of an equimolar mixture of **2a** and **2b** in  $\text{CDCl}_3$  (with integrals of the signal intensities of **2a**, **2b** and **2c**).

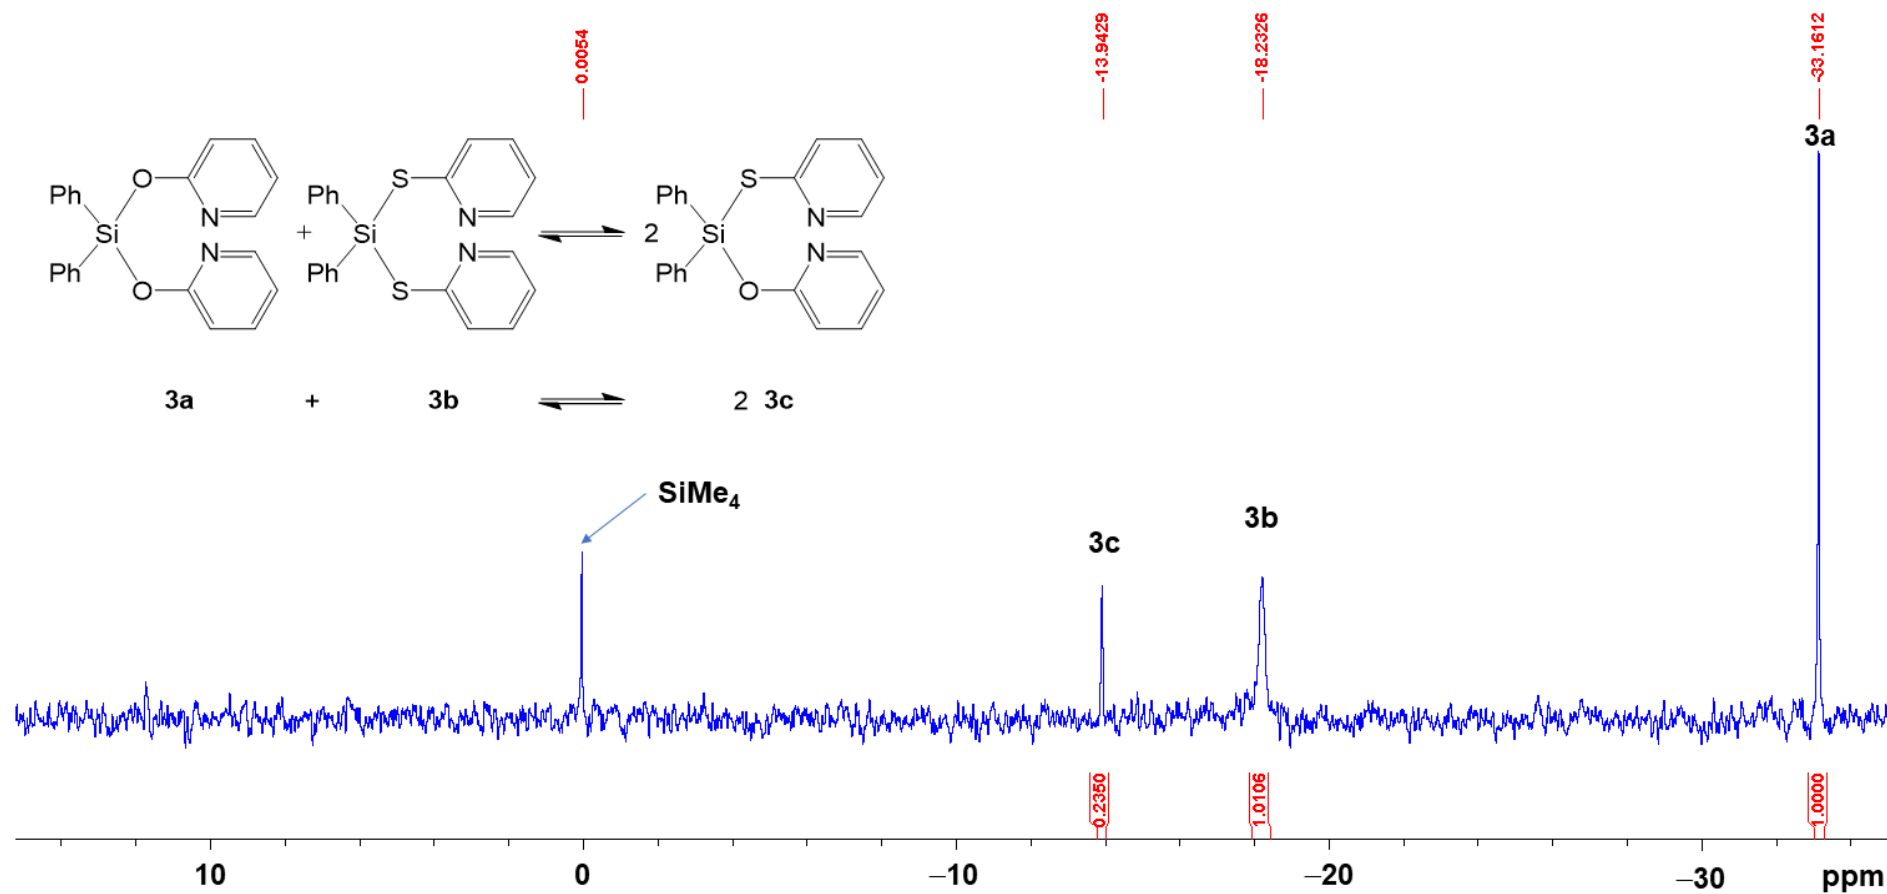

**Figure S16.**  $^{29}\text{Si}\{^1\text{H}\}$  NMR spectrum of an equimolar mixture of **3a** and **3b** in  $\text{CDCl}_3$  (with integrals of the signal intensities of **3a**, **3b** and **3c**).

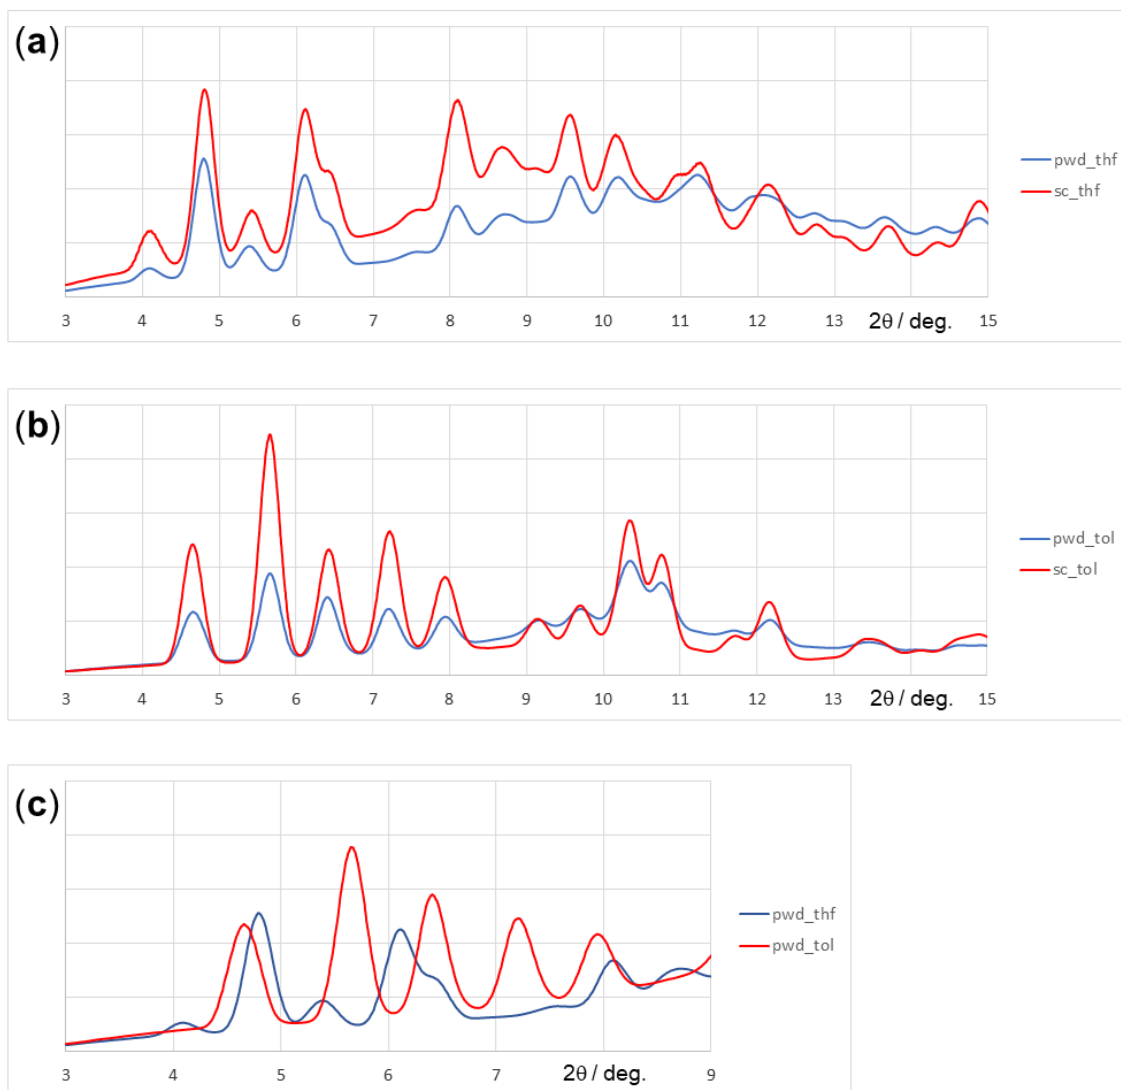

**Figure S17.** X-ray powder diffraction patterns of compounds **3b<sup>1</sup>** and **3b<sup>2</sup>** (modification 1) recorded with Mo K $\alpha$  radiation using Gandolfi scans. **(a)** Diffraction pattern recorded from a powdered bulk sample (blue trace) and from a single crystal (red trace) of compound **3b<sup>1</sup>**. **(b)** Diffraction pattern recorded from a powdered bulk sample (blue trace) and from a single crystal (red trace) of modification 1 of compound **3b<sup>2</sup>**. **(c)** Superposition (low-angle fraction) of the diffraction patterns recorded from powdered bulk samples of compound **3b<sup>1</sup>** (blue trace) and of modification 1 of compound **3b<sup>2</sup>** (red trace).

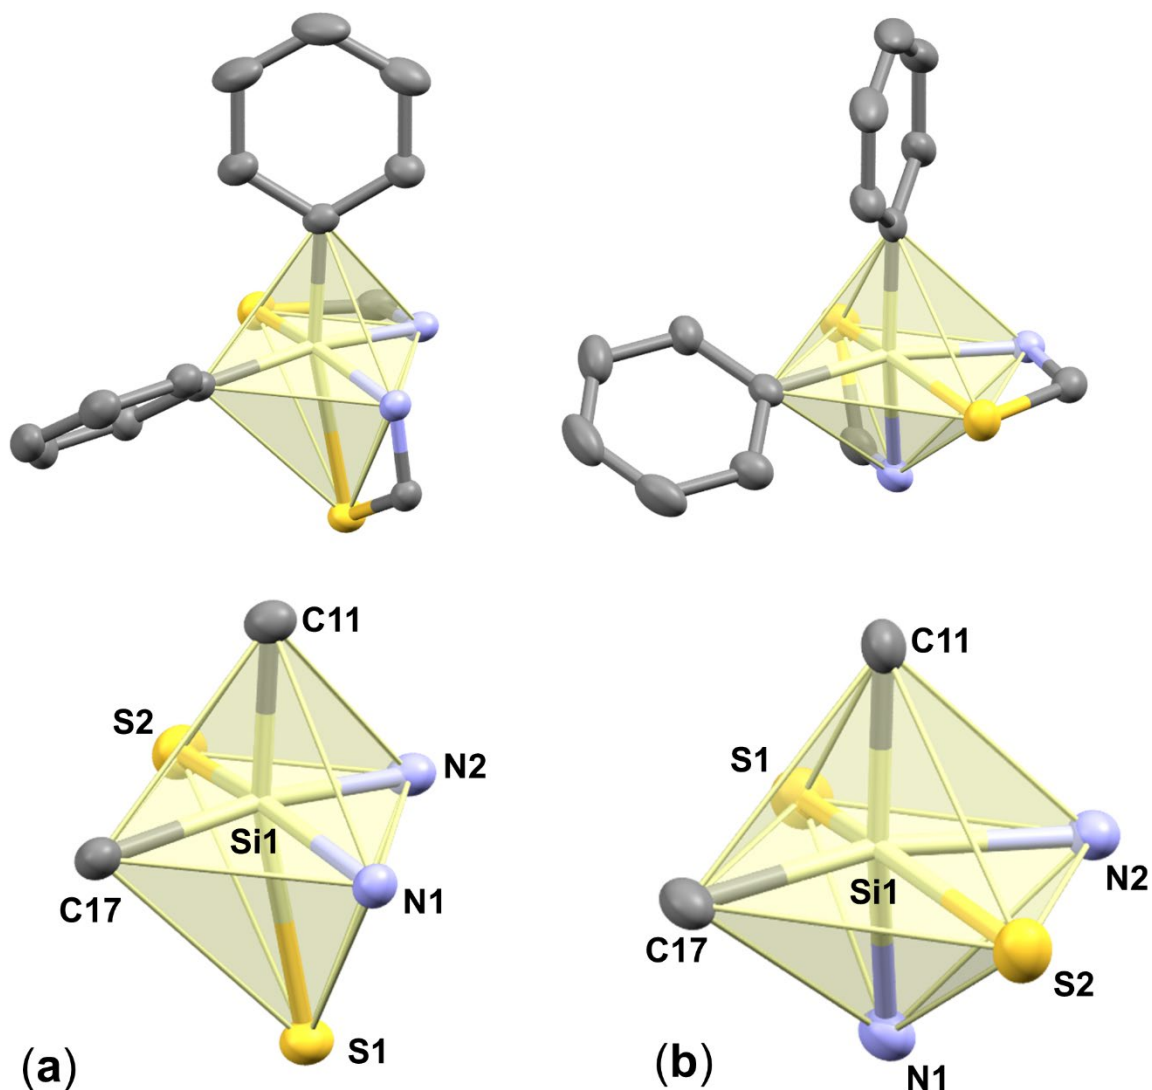

**Figure S18.** Graphical representations of the Si coordination polyhedra of compounds **3b**<sup>1</sup> (a) and **3b**<sup>2</sup> (modification 1) (b) with atom labels (bottom) and with some additional atoms attached for a better image of the polyhedron within the molecule (top). Thermal displacement ellipsoids are shown at the 50% probability level.

### Atomic coordinates and total energies:

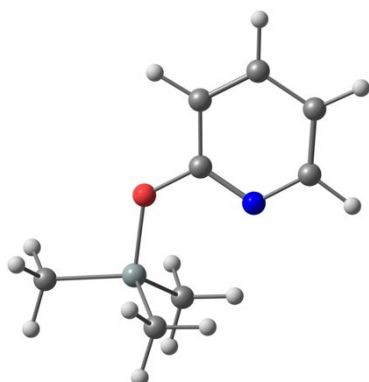

**Figure S19.** Optimized molecular structure of **1a<sup>00</sup>**.

PBE0:

final single point energy: -733.115769572522 a.u.

final Gibbs free energy: -732.95891063 a.u.

B2T-PLYP:

final single point energy: -733.182559307509 a.u.

**Table S1.** Atomic coordinates for optimized structure of **1a<sup>00</sup>**.

|    |                   |                   |                   |
|----|-------------------|-------------------|-------------------|
| Si | 1.64226471121404  | 11.63269310574833 | 9.49661201628772  |
| O  | 1.58421658680012  | 9.95543507091513  | 9.25036189387188  |
| N  | 3.72162905143113  | 9.56589041958931  | 9.95647235918383  |
| C  | 2.57855190888991  | 9.09647613604556  | 9.48195373332088  |
| C  | 2.36439650042564  | 7.74172956039284  | 9.21055577732996  |
| H  | 1.40687258648760  | 7.41659178704202  | 8.82627009997140  |
| C  | 3.39909098465388  | 6.86231954057217  | 9.44542336980121  |
| H  | 3.26792759712726  | 5.80530965742259  | 9.24587326650475  |
| C  | 4.60860233054710  | 7.34426277758359  | 9.93807054293026  |
| H  | 5.44447530109052  | 6.68557443359806  | 10.13193038850608 |
| C  | 4.71287688997745  | 8.70034428215870  | 10.17561321078449 |
| H  | 5.63505033517565  | 9.12380672723781  | 10.56160924692602 |
| C  | 2.96517778476654  | 12.40711061654416 | 8.44216630863426  |
| H  | 3.96137818200530  | 12.13976984515202 | 8.79410531297085  |
| H  | 2.86607620753795  | 13.49569005210375 | 8.46950298591259  |
| H  | 2.86658692233509  | 12.08813268935693 | 7.40182030417734  |
| C  | 1.86378833281038  | 12.01457916002057 | 11.30432335880757 |
| H  | 1.11965366815576  | 11.48737732102761 | 11.90583332809422 |
| H  | 1.73281919626403  | 13.08691781500667 | 11.47296307439932 |
| H  | 2.85688875062564  | 11.72911283332268 | 11.65180130951820 |
| C  | -0.04489244496929 | 12.16127755802551 | 8.91632640742531  |
| H  | -0.19467786170256 | 11.90755670763437 | 7.86463355664270  |
| H  | -0.16006611727093 | 13.24270001411969 | 9.02331441368990  |
| H  | -0.83093940437827 | 11.67769388937980 | 9.50047973430907  |

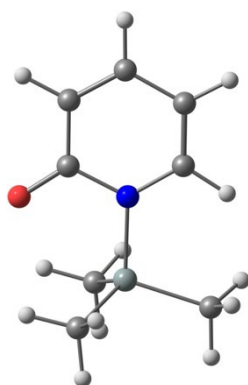

**Figure S20.** Optimized molecular structure of **1a<sup>N</sup>**.

PBE0:

final single point energy: -733.106672500659 a.u.

final Gibbs free energy: -732.9491742 a.u.

B2T-PLYP:

final single point energy: -733.169954670087 a.u.

**Table S2.** Atomic coordinates for optimized structure of **1a<sup>N</sup>**.

|    |                  |                   |                   |
|----|------------------|-------------------|-------------------|
| Si | 3.06495509912255 | 11.18865502097981 | 8.95652280554664  |
| O  | 1.51895111814178 | 9.40461257538295  | 7.41654987734985  |
| N  | 2.68586317315991 | 9.45333202238622  | 9.35545179696170  |
| C  | 1.88709543203838 | 8.79246992885387  | 8.42381328027453  |
| C  | 1.55630013027601 | 7.42960827642696  | 8.72660604440754  |
| H  | 0.93432201249191 | 6.90803236011042  | 8.01136420580282  |
| C  | 2.00711355617696 | 6.83253600009054  | 9.86138318160422  |
| H  | 1.74366529441023 | 5.80156369284731  | 10.07004688687909 |
| C  | 2.81717610115456 | 7.54503102746666  | 10.77290747315198 |
| H  | 3.18739065280841 | 7.09034127874271  | 11.68022427592883 |
| C  | 3.12548245499655 | 8.83538356258612  | 10.48270342653188 |
| H  | 3.73931331932488 | 9.43257020797432  | 11.14273908143729 |
| C  | 4.03210640294363 | 11.26457399651166 | 7.37127769502850  |
| H  | 4.90095616285982 | 10.60415582118015 | 7.42119088545945  |
| H  | 4.39550673468980 | 12.28453375308252 | 7.21974604861647  |
| H  | 3.42155500615978 | 10.97632815228424 | 6.51753003518082  |
| C  | 4.14622870091864 | 11.78567712332376 | 10.35688896080022 |
| H  | 3.64101562875853 | 11.75322691619138 | 11.32453922856078 |
| H  | 4.40382128666819 | 12.82918871531347 | 10.15593201011065 |
| H  | 5.08098856309126 | 11.22574249132984 | 10.43128618366594 |
| C  | 1.48108359738076 | 12.16114326512790 | 8.94578424538081  |
| H  | 0.83881491763027 | 11.86689618983452 | 8.11731100378915  |
| H  | 1.70921719744193 | 13.22648039635110 | 8.85599582541736  |
| H  | 0.93786626835522 | 12.01236174862139 | 9.88193838211330  |

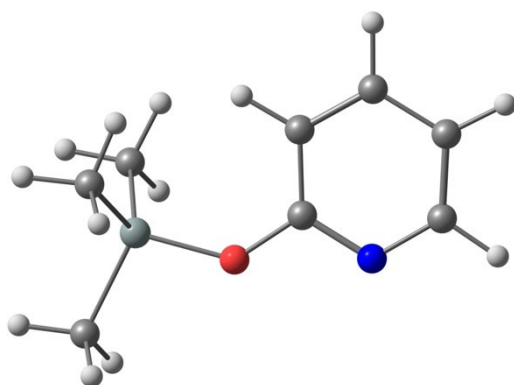

**Figure S21.** Optimized molecular structure of **1a**<sup>O180</sup>.

PBE0:

final single point energy: -733.111105500651 a.u.

final Gibbs free energy: -732.95426769 a.u.

B2T-PLYP:

final single point energy: -733.177586030146 a.u.

**Table S3.** Atomic coordinates for optimized structure of **1a**<sup>O180</sup>.

|    |                   |                   |                   |
|----|-------------------|-------------------|-------------------|
| Si | -0.36229981055877 | 9.77907772110308  | 8.83538435279658  |
| O  | 1.31796104688907  | 9.86865671819777  | 8.82906123688020  |
| N  | 3.50761112090744  | 9.38895201277160  | 8.83895118152150  |
| C  | 2.26914030721977  | 8.94021329270512  | 8.69437547758556  |
| C  | 1.98151302944634  | 7.59974309399788  | 8.41766830232536  |
| H  | 0.96031316829266  | 7.26381033623869  | 8.30197425723522  |
| C  | 3.03353491477278  | 6.71476630308153  | 8.29348230480768  |
| H  | 2.83744878210907  | 5.67060711767835  | 8.07992253918464  |
| C  | 4.33450236554300  | 7.17607523929180  | 8.44334920234419  |
| H  | 5.18635503286474  | 6.51557394679751  | 8.35279593772077  |
| C  | 4.50904316743832  | 8.52098959261506  | 8.71443474260440  |
| H  | 5.50716328018521  | 8.92999167772427  | 8.83967071633193  |
| C  | -0.87071075952651 | 11.54167601427691 | 9.11868312947662  |
| H  | -0.49298449062698 | 11.90759561584730 | 10.07566809875439 |
| H  | -1.95991324894210 | 11.62779344410965 | 9.12590883297577  |
| H  | -0.48337072289563 | 12.18750010712919 | 8.32786092494361  |
| C  | -0.92214444314118 | 8.67996838882514  | 10.23063036398813 |
| H  | -0.61350983443825 | 7.64177744985527  | 10.09664346341673 |
| H  | -2.01323229032948 | 8.69834594512804  | 10.29658967555981 |
| H  | -0.52090233910743 | 9.03529935140675  | 11.18241635401218 |
| C  | -0.98325909774809 | 9.17008648046828  | 7.18740281304459  |
| H  | -0.56060327126370 | 9.76397554863762  | 6.37383392835303  |
| H  | -2.07081235747991 | 9.27706754300549  | 7.15150912712862  |
| H  | -0.74662269761035 | 8.12091362310752  | 7.00392391600834  |

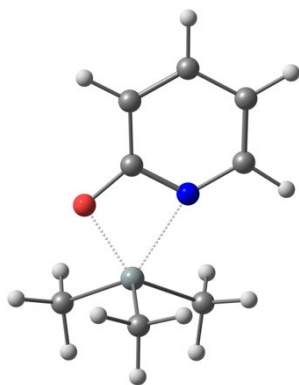

**Figure S22.** Optimized molecular structure of **1a<sup>TS</sup>**.

PBE0:

final single point energy: -733.085804038855 a.u.

final Gibbs free energy: -732.92717431 a.u.

**Table S4.** Atomic coordinates for optimized structure of **1a<sup>TS</sup>**.

|    |              |              |              |
|----|--------------|--------------|--------------|
| Si | -0.597454000 | 1.112969000  | -0.147809000 |
| O  | -1.045757000 | -0.449697000 | -1.176030000 |
| N  | 0.579671000  | -0.670695000 | 0.247405000  |
| C  | -0.164390000 | -1.289527000 | -0.695035000 |
| C  | 0.042335000  | -2.648349000 | -1.008505000 |
| H  | -0.547429000 | -3.140469000 | -1.779821000 |
| C  | 1.002741000  | -3.324997000 | -0.265221000 |
| H  | 1.172318000  | -4.385681000 | -0.453185000 |
| C  | 1.745337000  | -2.673197000 | 0.736976000  |
| H  | 2.483298000  | -3.206113000 | 1.331589000  |
| C  | 1.502398000  | -1.324818000 | 0.962241000  |
| H  | 2.027626000  | -0.744662000 | 1.722954000  |
| C  | 0.516879000  | 2.033673000  | -1.355501000 |
| H  | 1.578153000  | 1.812943000  | -1.177236000 |
| H  | 0.371701000  | 3.114676000  | -1.211734000 |
| H  | 0.278426000  | 1.790347000  | -2.398662000 |
| C  | -0.115850000 | 1.673594000  | 1.614218000  |
| H  | -0.623977000 | 1.079179000  | 2.387638000  |
| H  | -0.411596000 | 2.724416000  | 1.755524000  |
| H  | 0.968072000  | 1.594308000  | 1.783802000  |
| C  | -2.410447000 | 1.655160000  | -0.222959000 |
| H  | -2.839640000 | 1.542448000  | -1.226593000 |
| H  | -2.513934000 | 2.697277000  | 0.110565000  |
| H  | -2.998480000 | 1.027212000  | 0.465378000  |



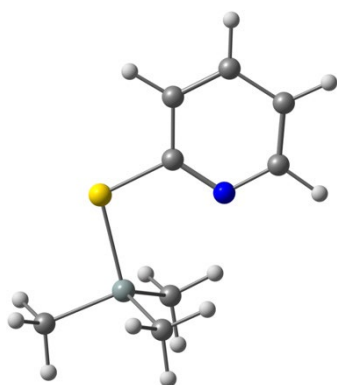

**Figure S23.** Optimized molecular structure of **1b<sup>S0</sup>**.

PBE0:

final single point energy: -1057.6378331962 a.u.

final Gibbs free energy: -1057.48480527 a.u.

B2T-PLYP:

final single point energy: -1057.66436563872 a.u.

**Table S5.** Atomic coordinates for optimized structure of **1b<sup>S0</sup>**.

|    |                   |                   |                   |
|----|-------------------|-------------------|-------------------|
| Si | 1.51395315432863  | 11.74017915482680 | 9.45953345807495  |
| S  | 1.03429633916081  | 9.66625529171296  | 8.99734743136695  |
| N  | 3.54672024082379  | 9.44388597705147  | 9.89036306392399  |
| C  | 2.50373602108898  | 8.78315673620272  | 9.40245732231337  |
| C  | 2.51447757906052  | 7.40193502970686  | 9.19200080656339  |
| H  | 1.64092057707917  | 6.90530920384770  | 8.78982232957921  |
| C  | 3.65904342258437  | 6.69873718146588  | 9.50834109761625  |
| H  | 3.69718219921448  | 5.62654340747605  | 9.35633118479833  |
| C  | 4.75508469765323  | 7.38206863753093  | 10.02039562708109 |
| H  | 5.67123588908599  | 6.86889807568345  | 10.28104181118605 |
| C  | 4.64378555785960  | 8.75000027346710  | 10.18957865345544 |
| H  | 5.47452829216600  | 9.32588374066332  | 10.58588188187890 |
| C  | 2.91480005077170  | 12.36445837231293 | 8.40110626356178  |
| H  | 3.84417731843091  | 11.84871621608500 | 8.63985995415529  |
| H  | 3.05253331435077  | 13.43524005460189 | 8.57694550381028  |
| H  | 2.69237891901759  | 12.21803666430859 | 7.34245222734806  |
| C  | 1.83547553355389  | 11.97073376034966 | 11.28032330093722 |
| H  | 0.97996443673578  | 11.63232303056497 | 11.86788704131676 |
| H  | 1.99595361994962  | 13.03240931733265 | 11.48889449155886 |
| H  | 2.71944950035947  | 11.41597618687931 | 11.59268075802773 |
| C  | -0.08597287802489 | 12.57652913638722 | 8.97390630579332  |
| H  | -0.29878497100180 | 12.44407593662989 | 7.91131024795995  |
| H  | -0.00709506514583 | 13.64891300069544 | 9.17253208510447  |
| H  | -0.93009574910285 | 12.18808761421701 | 9.54702315258815  |

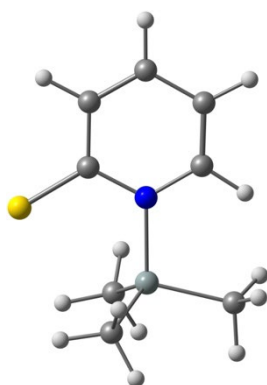

**Figure S24.** Optimized molecular structure of **1b<sup>N</sup>**.

PBE0:

final single point energy: -1057.63464573041 a.u.

final Gibbs free energy: -1057.47967314 a.u.

B2T-PLYP:

final single point energy: -1057.66064039419 a.u.

**Table S6.** Atomic coordinates for optimized structure of **1b<sup>N</sup>**.

|    |                  |                   |                   |
|----|------------------|-------------------|-------------------|
| Si | 3.02513466414811 | 11.18533125376102 | 8.90884220445865  |
| S  | 1.24881334834660 | 9.42128777269851  | 7.06275906145684  |
| N  | 2.63876229193046 | 9.42881526664140  | 9.32446695715012  |
| C  | 1.84655847009911 | 8.70530012214406  | 8.46366323133692  |
| C  | 1.57150477662990 | 7.35947808818922  | 8.81382871849555  |
| H  | 0.94794294940605 | 6.79134201469152  | 8.13789029448923  |
| C  | 2.07418857524850 | 6.80395882410166  | 9.95418279398747  |
| H  | 1.85086691678506 | 5.77230873461662  | 10.19942354775942 |
| C  | 2.88103214375256 | 7.57522818827850  | 10.80723166679380 |
| H  | 3.29809410171797 | 7.17323657973671  | 11.71926580841627 |
| C  | 3.13259048100938 | 8.86600973045888  | 10.45711686244146 |
| H  | 3.74420510650807 | 9.50543002371096  | 11.07503605961599 |
| C  | 4.06560555468147 | 11.27043053428686 | 7.36749048941298  |
| H  | 4.66925844171928 | 10.36541391868073 | 7.26803301782810  |
| H  | 4.74773871892130 | 12.12114299384075 | 7.45002718621665  |
| H  | 3.46269417240018 | 11.37759440854767 | 6.46881709509865  |
| C  | 4.10177340803854 | 11.75219975205719 | 10.33132379422212 |
| H  | 3.59189816844576 | 11.72626825405449 | 11.29684887600680 |
| H  | 4.35903304014705 | 12.79565914943504 | 10.12730257745979 |
| H  | 5.03856726188765 | 11.19657049202351 | 10.41125213949725 |
| C  | 1.47555416589160 | 12.21659413310411 | 8.94551726513824  |
| H  | 1.00887974597158 | 12.29251471135593 | 7.96616327729438  |
| H  | 1.72751378001697 | 13.21771107710881 | 9.30614396330237  |
| H  | 0.74857852729673 | 11.78461849947554 | 9.63710595212054  |

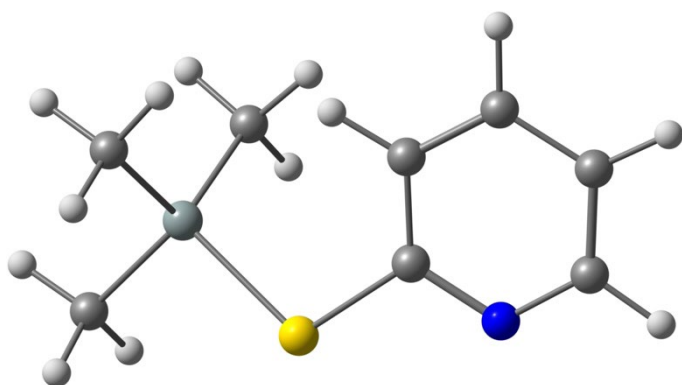

**Figure S25.** Optimized molecular structure of **1b**<sup>S180</sup>.

PBE0:

final single point energy: -1057.63345192101 a.u.

final Gibbs free energy: -1057.48067333 a.u.

B2T-PLYP:

final single point energy: -1057.65973921804 a.u.

**Table S7.** Atomic coordinates for optimized structure of **1b**<sup>180</sup>.

|    |                   |                   |                   |
|----|-------------------|-------------------|-------------------|
| Si | -0.45999718559208 | 9.90884652357587  | 8.78070742571387  |
| S  | 1.61899263612028  | 10.50118572848793 | 8.57445777778445  |
| N  | 3.86951971285975  | 9.24260924918210  | 8.92577762895009  |
| C  | 2.60503319287443  | 9.03322554162746  | 8.57087174087432  |
| C  | 2.12916863059291  | 7.77619263760287  | 8.19940395279630  |
| H  | 1.10463250218136  | 7.63735344728307  | 7.88700498721646  |
| C  | 3.00387697365245  | 6.70636395573826  | 8.22450005427220  |
| H  | 2.65765808421046  | 5.71840459417446  | 7.94477906316013  |
| C  | 4.32277970703316  | 6.91613664751765  | 8.59891197831689  |
| H  | 5.04023412342581  | 6.10676731345063  | 8.62829486377421  |
| C  | 4.70197667492830  | 8.20536769106248  | 8.93107756555633  |
| H  | 5.72576174875890  | 8.42092175397007  | 9.22108524820632  |
| C  | -1.25738344145474 | 11.55640368029029 | 9.13909116177961  |
| H  | -0.89697510210060 | 11.97293500538142 | 10.08115825813847 |
| H  | -2.34095426518539 | 11.43055620192017 | 9.20974234112766  |
| H  | -1.05190428341933 | 12.27437880507326 | 8.34247337451749  |
| C  | -0.65935457997961 | 8.72950012306971  | 10.21103015297129 |
| H  | -0.13543947380935 | 7.78708847479409  | 10.04624265989948 |
| H  | -1.72097400816117 | 8.50624931121298  | 10.34897275123819 |
| H  | -0.27899734908479 | 9.17867182913729  | 11.13008182067954 |
| C  | -1.16210696968637 | 9.20507105847725  | 7.19905567667362  |
| H  | -0.99842196669779 | 9.89814371729626  | 6.37148856638812  |
| H  | -2.24050729148398 | 9.06730548188410  | 7.31999603521795  |
| H  | -0.73239721798266 | 8.24077779178992  | 6.92593579374674  |

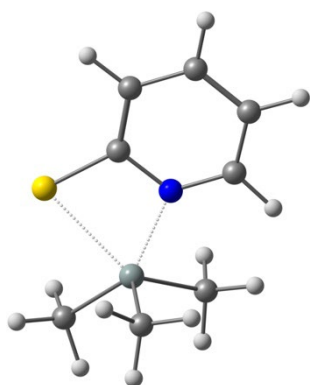

**Figure S26.** Optimized molecular structure of **1b<sup>TS</sup>**.

PBE0:

final single point energy: -1057.617930513610 a.u.

final Gibbs free energy: -1057.46268293 a.u.

**Table S8.** Atomic coordinates for optimized structure of **1b<sup>TS</sup>**.

|    |                   |                   |                   |
|----|-------------------|-------------------|-------------------|
| Si | -0.64281450138202 | 1.04267078855865  | -0.05287585149029 |
| S  | -1.73992242965822 | -0.76161065247304 | -1.43386654134499 |
| N  | 0.25988690274388  | -0.72289086791610 | 0.08352043371108  |
| C  | -0.39607453143061 | -1.55436338779400 | -0.75076098147692 |
| C  | 0.07138595085885  | -2.85825484736934 | -0.94729390197316 |
| H  | -0.45870268426796 | -3.52135940713769 | -1.61648726697844 |
| C  | 1.20433376490611  | -3.26121504345935 | -0.27654440744008 |
| H  | 1.58123433984281  | -4.26786732865170 | -0.41387882846298 |
| C  | 1.87093109723912  | -2.37912063619418 | 0.57713335009818  |
| H  | 2.76334517864890  | -2.67419718308217 | 1.11052904332113  |
| C  | 1.36380444288867  | -1.11084494610022 | 0.72920317311127  |
| H  | 1.83173139054810  | -0.37760601363492 | 1.37154546828349  |
| C  | 0.59319980232127  | 1.81752205540543  | -1.22815234101800 |
| H  | 1.61844728919665  | 1.63862593423798  | -0.89836290171677 |
| H  | 0.42736717083018  | 2.89709648723971  | -1.26534860892032 |
| H  | 0.48309777409425  | 1.42417827916155  | -2.23974601676052 |
| C  | -0.22498702322008 | 1.46553420945910  | 1.74400815597095  |
| H  | -0.83845670873348 | 0.87025530309895  | 2.42734761608744  |
| H  | -0.46658925792991 | 2.51545822321996  | 1.92510712003358  |
| H  | 0.81994079253892  | 1.31214346763319  | 2.01805812562455  |
| C  | -2.28181539199323 | 1.98190202000387  | -0.19900581206625 |
| H  | -2.63639026811740 | 1.99785851486547  | -1.23137080715722 |
| H  | -2.14825098217766 | 3.01069791699870  | 0.15060776778489  |
| H  | -3.05470211774714 | 1.51538611393018  | 0.41663201277937  |

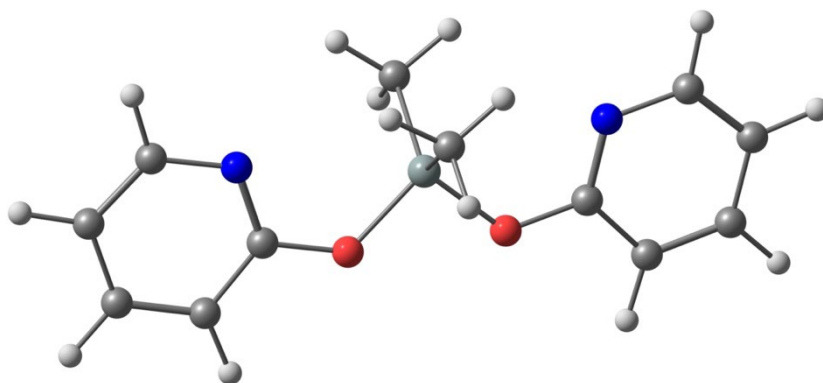

PBE0:

B2T-PLYP:

**Table S9.** Atomic coordinates for optimized structure of **2a<sup>00</sup>**.

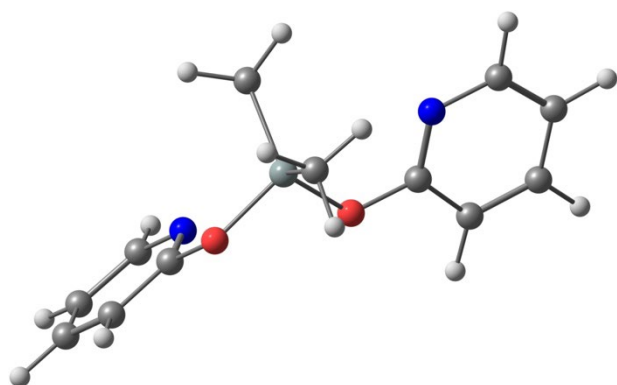

**Figure S28.** Optimized molecular structure of **2a<sup>OC</sup>**.

PBE0:

final single point energy: -1016.20489226343 a.u.

final Gibbs free energy: -1016.0045722 a.u.

B2T-PLYP:

final single point energy: -1016.34062391185 a.u.

**Table S10.** Atomic coordinates for optimized structure of **2a<sup>OC</sup>**.

|    |                   |                  |                   |
|----|-------------------|------------------|-------------------|
| Si | -1.97585532387687 | 3.19901263466484 | 2.16303097792054  |
| O  | -1.15346365385241 | 2.38336128743815 | 0.95195382866852  |
| O  | -0.73216938027425 | 3.99898999050924 | 2.96391553661992  |
| N  | -0.48671725277913 | 4.24012209932066 | -0.20292981724849 |
| N  | -2.17098568352051 | 4.86850249314498 | 4.49864934671661  |
| C  | -0.54664814975182 | 2.92306327755570 | -0.11272358482815 |
| C  | -0.00783546076919 | 2.06265242058170 | -1.07137211946679 |
| H  | -0.08877503836723 | 0.99213099733797 | -0.93949386737634 |
| C  | 0.61638872982848  | 2.62453139723057 | -2.16466449105584 |
| H  | 1.04620668462321  | 1.98877646013461 | -2.92964267927994 |
| C  | 0.68676164687804  | 4.00988446007853 | -2.27406226450841 |
| H  | 1.16817873211651  | 4.48777296754973 | -3.11668440725780 |
| C  | 0.12033784145111  | 4.76663962498338 | -1.26730625853283 |
| H  | 0.15087813706477  | 5.85098101727963 | -1.30774175573440 |
| C  | -0.93431240353223 | 4.76612856557233 | 4.03913290468785  |
| C  | 0.15616390807920  | 5.41412450794267 | 4.62157211190377  |
| H  | 1.14385225245826  | 5.29270815196323 | 4.19801970818787  |
| C  | -0.07901874075546 | 6.19570915755867 | 5.73273668666586  |
| H  | 0.74194122206218  | 6.71470535314199 | 6.21309215213059  |
| C  | -1.37450965133344 | 6.31164040897121 | 6.22858651510450  |
| H  | -1.59570415515370 | 6.91590839187048 | 7.09807009283160  |
| C  | -2.38062648514500 | 5.62913640623890 | 5.57408180255799  |
| H  | -3.40717096039523 | 5.68806123783653 | 5.92171501776281  |
| C  | -2.65402861771893 | 1.82259717122400 | 3.19116109211784  |
| H  | -3.34158485238175 | 1.21669817097917 | 2.59629805741811  |
| H  | -3.19525822683455 | 2.21820207431031 | 4.05074970403735  |
| H  | -1.85103279298799 | 1.17596799451812 | 3.55021792303446  |
| C  | -3.25294240385624 | 4.34234396241884 | 1.47008993628510  |
| H  | -2.81048376423555 | 5.29701425427403 | 1.18756362508057  |
| H  | -4.03696180614664 | 4.51903806779469 | 2.20721205852716  |
| H  | -3.70369998589360 | 3.89710881157499 | 0.57979795002986  |

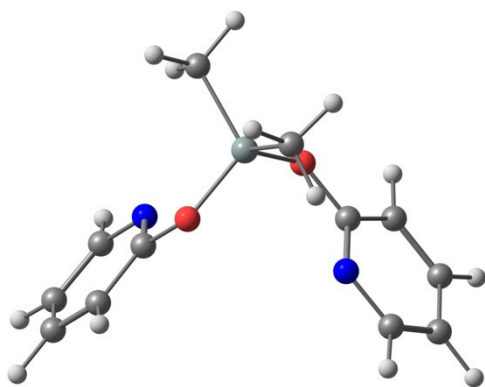

**Figure S29.** Optimized molecular structure of **2a<sup>CC</sup>**.

PBE0:

final single point energy: -1016.20461047664 a.u.

final Gibbs free energy: -1016.00526258 a.u.

B2T-PLYP:

final single point energy: -1016.34057880634 a.u.

**Table S11.** Atomic coordinates for optimized structure of **2a<sup>CC</sup>**.

|    |                   |                   |                   |
|----|-------------------|-------------------|-------------------|
| Si | -1.53879749523286 | 2.50364295835553  | 2.37438775097594  |
| O  | -1.20593404148877 | 1.71359340440571  | 0.93913897824916  |
| O  | -0.19272875506531 | 3.28561634100759  | 2.98404832476902  |
| N  | -0.41353584863319 | 3.54086141332346  | -0.18138468586610 |
| N  | 1.17327732633901  | 1.45427884047241  | 3.01964847446699  |
| C  | -0.71174339586182 | 2.25323463550163  | -0.18193340278732 |
| C  | -0.53458573604262 | 1.42468281447384  | -1.29134679027271 |
| H  | -0.79731930193183 | 0.37741743225041  | -1.22769395453914 |
| C  | -0.02120598853680 | 1.98676038884063  | -2.44078405704761 |
| H  | 0.13034794182232  | 1.37521490158033  | -3.32234278193316 |
| C  | 0.29830990775458  | 3.34090492509673  | -2.45552816206995 |
| H  | 0.70357652644515  | 3.81767280735372  | -3.33792218241349 |
| C  | 0.08194498206451  | 4.06816022685675  | -1.30169582791572 |
| H  | 0.31495148171018  | 5.12770059189925  | -1.26425757825315 |
| C  | 0.99535714858859  | 2.73944036298265  | 3.27133703310409  |
| C  | 1.98481669618171  | 3.55898936743167  | 3.81726812765409  |
| H  | 1.77755177778013  | 4.60506314417509  | 3.99773452182552  |
| C  | 3.20662987938099  | 2.98967330524157  | 4.10726062846363  |
| H  | 3.99932444108037  | 3.59415262826197  | 4.53185595020218  |
| C  | 3.40913807725235  | 1.63750387431600  | 3.84874172182979  |
| H  | 4.35383224805180  | 1.15533993906946  | 4.06156299886654  |
| C  | 2.36150419376668  | 0.92016475491088  | 3.30546311290973  |
| H  | 2.47145482830415  | -0.13694652840800 | 3.08471607414183  |
| C  | -2.12347046401705 | 1.16542529870905  | 3.50447661857281  |
| H  | -3.06561380825401 | 0.75149629034651  | 3.13744602246844  |
| H  | -2.29730783550457 | 1.56600515035855  | 4.50564318233512  |
| H  | -1.39117790436452 | 0.36139295930147  | 3.57285263013718  |
| C  | -2.78197666185321 | 3.84954525786568  | 2.14598356421636  |
| H  | -2.37600068031662 | 4.65820807268477  | 1.53921768039301  |
| H  | -3.07850864862536 | 4.25209228411133  | 3.11736044782570  |
| H  | -3.67545889079395 | 3.45747715722324  | 1.65489457969115  |

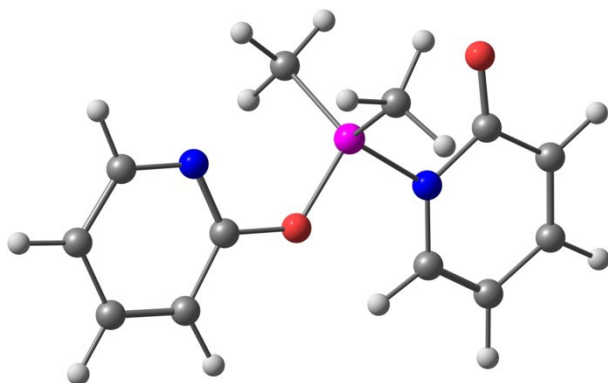

**Figure S30.** Optimized molecular structure of **2a<sup>NO</sup>**.

PBE0:

final single point energy: -1016.19657375118 a.u.

final Gibbs free energy: -1015.99686015 a.u.

B2T-PLYP:

final single point energy: -1016.32858889964 a.u.

**Table S12.** Atomic coordinates for optimized structure of **2a<sup>NO</sup>**.

|    |                   |                   |                   |
|----|-------------------|-------------------|-------------------|
| Si | 9.47611596790838  | 11.75412777698802 | 8.91747534702957  |
| O  | 8.76023359366890  | 10.60463612513671 | 7.90899959494763  |
| O  | 11.62520097786807 | 13.11659016767037 | 9.78494436856974  |
| N  | 6.68217398701167  | 10.88091882421570 | 8.80579667656959  |
| N  | 11.10955454804291 | 11.67646953816507 | 8.14176223941426  |
| C  | 7.46042551899846  | 10.28981238880736 | 7.91496720760962  |
| C  | 6.99320143795304  | 9.35929181069264  | 6.98516928877227  |
| H  | 7.67988046529511  | 8.90825398960536  | 6.28148192423612  |
| C  | 5.64936999442182  | 9.05119163176287  | 7.00170910620041  |
| H  | 5.24879294168534  | 8.33527534391990  | 6.29381873416560  |
| C  | 4.81721780386980  | 9.66703744877713  | 7.93162670668233  |
| H  | 3.75811435202136  | 9.45105409129554  | 7.97342963058492  |
| C  | 5.38434030772478  | 10.57102871370344 | 8.80808042743987  |
| H  | 4.77670870037720  | 11.07678218157288 | 9.55168806980190  |
| C  | 12.02430626335585 | 12.49142703696541 | 8.79267781420261  |
| C  | 13.34633171334432 | 12.52995912136853 | 8.24665318691330  |
| H  | 14.07022784536812 | 13.16118884503788 | 8.74431602316036  |
| C  | 13.66019148500163 | 11.79648069009694 | 7.14411714041986  |
| H  | 14.66579126792575 | 11.83535276401760 | 6.74040999496894  |
| C  | 12.69036523430638 | 10.98411594639349 | 6.51629275353927  |
| H  | 12.92474297156982 | 10.39746809464538 | 5.64001520577879  |
| C  | 11.43778145555223 | 10.95238198465971 | 7.04133765117864  |
| H  | 10.64158756070634 | 10.35653795657532 | 6.61854144273972  |
| C  | 8.73201761157544  | 13.41730433294846 | 8.61237927646564  |
| H  | 7.79073730085058  | 13.51054597231323 | 9.15458496489160  |
| H  | 8.52797342088514  | 13.54347227083853 | 7.54682987943368  |
| H  | 9.41283895410111  | 14.20209634160897 | 8.93965796097558  |
| C  | 9.51263003049308  | 11.09219237721550 | 10.64045707707590 |
| H  | 9.84475039667330  | 11.85637630166602 | 11.34111275219759 |
| H  | 10.19422416986534 | 10.24148478950889 | 10.70505831564816 |
| H  | 8.51163838557793  | 10.75773863882624 | 10.91701126638593 |



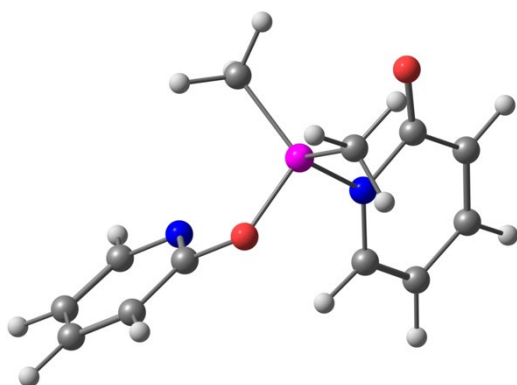

**Figure S31.** Optimized molecular structure of **2a'OC**.

PBE0:

final single point energy: -1016.19669796871 a.u.

final Gibbs free energy: -1015.99590271 a.u.

B2T-PLYP:

final single point energy: -1016.32856724497 a.u.

**Table S13.** Atomic coordinates for optimized structure of **2a'OC**.

|    |                   |                   |                  |
|----|-------------------|-------------------|------------------|
| Si | -1.85399480704273 | 3.29820659596385  | 2.29078223965830 |
| O  | -1.54101668172443 | 1.70236868977645  | 1.84413464159247 |
| O  | -2.18755925189027 | 5.42109751887506  | 3.84291114759701 |
| N  | 0.67342952351815  | 1.71741906478311  | 2.40008936100191 |
| N  | -1.70034048205676 | 3.25156477410033  | 4.08846849437513 |
| C  | -0.32915547234065 | 1.13356429130204  | 1.76634847059599 |
| C  | -0.19245631656394 | -0.04712163321858 | 1.03520639869681 |
| H  | -1.05262376106119 | -0.47608249096892 | 0.53915045957572 |
| C  | 1.05825687985714  | -0.62482602668460 | 0.97271171777232 |
| H  | 1.20469325243871  | -1.54149982936433 | 0.41385881389486 |
| C  | 2.12498526996872  | -0.01876985958119 | 1.62941114453678 |
| H  | 3.12013413337721  | -0.44191540014995 | 1.60140508532747 |
| C  | 1.87748068696904  | 1.14750215146378  | 2.32627936269459 |
| H  | 2.67642990831421  | 1.65584377939848  | 2.85657223251103 |
| C  | -1.92382822747112 | 4.50406492116856  | 4.63475134374255 |
| C  | -1.82879828704508 | 4.60564758756921  | 6.05758736813466 |
| H  | -1.98912501344416 | 5.57929359163636  | 6.50073322545206 |
| C  | -1.55475075532262 | 3.50266144694851  | 6.80736266764906 |
| H  | -1.49004188718743 | 3.59026779345032  | 7.88617570434287 |
| C  | -1.35614656819414 | 2.24250723381174  | 6.20068652820939 |
| H  | -1.14400838878661 | 1.35981963195008  | 6.78601663989178 |
| C  | -1.43568119290158 | 2.16022553249100  | 4.84685811981613 |
| H  | -1.29464727288488 | 1.23130519866123  | 4.31275395969926 |
| C  | -3.62927413301764 | 3.48648841856390  | 1.81801255459941 |
| H  | -3.72899998421330 | 3.39201206944342  | 0.73408658941474 |
| H  | -4.00890526702069 | 4.46055729653102  | 2.12288603342202 |
| H  | -4.23432383727092 | 2.70675559917656  | 2.28458125463060 |
| C  | -0.64769116797780 | 4.43450131895428  | 1.47188649453082 |
| H  | 0.19700885325783  | 4.64600422227270  | 2.12639548426625 |
| H  | -1.13945274753933 | 5.37419117403461  | 1.22105549662453 |
| H  | -0.26646646674364 | 3.97406226564073  | 0.55761351374323 |

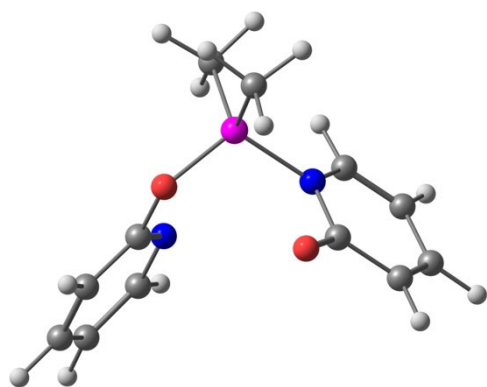

**Figure S32.** Optimized molecular structure of **2a'CC**.

PBE0:

final single point energy: -1016.19386752798 a.u.

final Gibbs free energy: -1015.99330533 a.u.

B2T-PLYP:

final single point energy: -1016.32593329201 a.u.

**Table S14.** Atomic coordinates for optimized structure of **2a'CC**.

|    |                   |                  |                  |
|----|-------------------|------------------|------------------|
| Si | -2.09426704298407 | 3.58834625985772 | 2.17310026376958 |
| O  | -1.15413174179676 | 4.82456448313900 | 1.56718872043194 |
| O  | 0.38868352426739  | 3.06655806253974 | 3.46175497712767 |
| N  | -1.91420071209493 | 6.41870176179590 | 3.01503246075555 |
| N  | -1.80095231978160 | 3.40865509563373 | 3.94004421143573 |
| C  | -1.06708523455741 | 6.06638843978955 | 2.06371847737074 |
| C  | -0.08777577881508 | 6.91760371927383 | 1.55146815882452 |
| H  | 0.58052125630444  | 6.56539395479806 | 0.77746797566651 |
| C  | -0.00791106872713 | 8.19221601129624 | 2.07111173516574 |
| H  | 0.74134868479802  | 8.88214050163085 | 1.70145735657208 |
| C  | -0.89232217441902 | 8.57929336072189 | 3.07328533539153 |
| H  | -0.85857482040157 | 9.56978734321515 | 3.50681094349290 |
| C  | -1.82100329736798 | 7.65470074181899 | 3.50850246005291 |
| H  | -2.52953083281919 | 7.90795394630107 | 4.29076934169543 |
| C  | -0.48361322224764 | 3.15389085597047 | 4.32782635384044 |
| C  | -0.25886910828414 | 3.01899334269133 | 5.73978187248177 |
| H  | 0.75662401885144  | 2.81565067752614 | 6.05258340521609 |
| C  | -1.27497249174598 | 3.15329394531380 | 6.63044953332082 |
| H  | -1.07863924027059 | 3.05422668330138 | 7.69224496133959 |
| C  | -2.58929714908549 | 3.42552272590416 | 6.18551395506592 |
| H  | -3.41110085892884 | 3.53928277932590 | 6.87726276667209 |
| C  | -2.80205098684955 | 3.54594114217816 | 4.85223267089577 |
| H  | -3.78223842095459 | 3.76080358910321 | 4.45054872764855 |
| C  | -1.59910035502822 | 2.06670208409608 | 1.25610224169656 |
| H  | -1.86891656988494 | 2.17197119446003 | 0.20256690385441 |
| H  | -2.13310708202312 | 1.20133613715554 | 1.65545005173640 |
| H  | -0.52874398524333 | 1.88757696459933 | 1.33550309832117 |
| C  | -3.89368656224463 | 3.95859233150533 | 1.93678038413149 |
| H  | -4.20956678436318 | 4.85124468653562 | 2.47557430795779 |
| H  | -4.52055957992191 | 3.11492661092989 | 2.23401468233733 |
| H  | -4.05617945138026 | 4.13092222959166 | 0.86955294373078 |

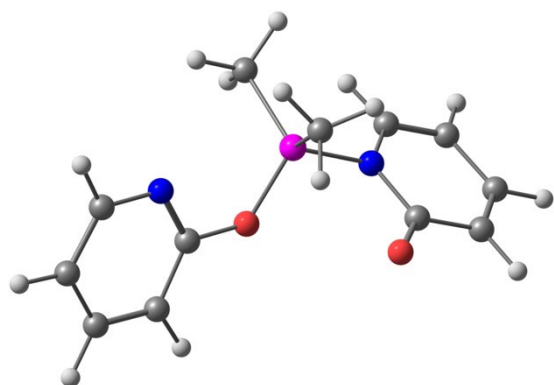

**Figure S33.** Optimized molecular structure of **2a**<sup>NC</sup>.

PBE0:

final single point energy: -1016.19294839839 a.u.

final Gibbs free energy: -1015.99222467 a.u.

B2T-PLYP:

final single point energy: -1016.32518572426 a.u.

**Table S15.** Atomic coordinates for optimized structure of **2a**<sup>NC</sup>.

|    |                   |                  |                   |
|----|-------------------|------------------|-------------------|
| Si | -0.88189682575781 | 2.76313098544533 | 2.81005801672528  |
| O  | -0.16035656743046 | 4.24450946168505 | 2.50219728579562  |
| O  | -2.74498082739418 | 4.52636412698025 | 3.96768476631146  |
| N  | 1.77995080307418  | 3.56409441745997 | 3.47392417259166  |
| N  | -2.56101525313282 | 3.08320073875989 | 2.23244280567931  |
| C  | 1.07137040027761  | 4.54124893467565 | 2.93278113263012  |
| C  | 1.54230897866208  | 5.84671919303732 | 2.79194342881326  |
| H  | 0.91091840664238  | 6.60261640644990 | 2.34523443944067  |
| C  | 2.81523449890253  | 6.12087801724648 | 3.24610745403489  |
| H  | 3.21743992146056  | 7.12305428444740 | 3.15730926828342  |
| C  | 3.57236618032241  | 5.10440493652015 | 3.82144125908977  |
| H  | 4.57298154236633  | 5.28465781275687 | 4.19072902378663  |
| C  | 3.00793827278004  | 3.84742541251111 | 3.91120800614531  |
| H  | 3.55826241335807  | 3.02257237148358 | 4.35231794620832  |
| C  | -3.29224884009373 | 3.99068943907020 | 3.00243160696670  |
| C  | -4.64826434077361 | 4.21856918708560 | 2.59033507326718  |
| H  | -5.22693884368013 | 4.91369593400752 | 3.18386894622273  |
| C  | -5.16822306180559 | 3.58810340993158 | 1.50556275360512  |
| H  | -6.19497441237098 | 3.77684062525648 | 1.21250158327314  |
| C  | -4.38154167010299 | 2.68710829350560 | 0.75177816680369  |
| H  | -4.77491639178988 | 2.17900378818976 | -0.11647933167994 |
| C  | -3.10234014063878 | 2.46789117258529 | 1.14602730128293  |
| H  | -2.45218593702098 | 1.78954329198883 | 0.61130578218096  |
| C  | -0.90113400863660 | 2.22966942643892 | 4.57889261791894  |
| H  | -0.09471399524759 | 1.51819977751682 | 4.76081221944341  |
| H  | -1.85507829094900 | 1.75098170454880 | 4.81084471108956  |
| H  | -0.78066605096791 | 3.08325481528071 | 5.24367985214866  |
| C  | -0.18153480653547 | 1.47174489780513 | 1.68097258332348  |
| H  | -0.15358949998907 | 1.79698871096669 | 0.63939861333529  |
| H  | -0.74497436830167 | 0.53783846676669 | 1.74326343555349  |
| H  | 0.84214035877311  | 1.27015187959616 | 2.00077859072867  |

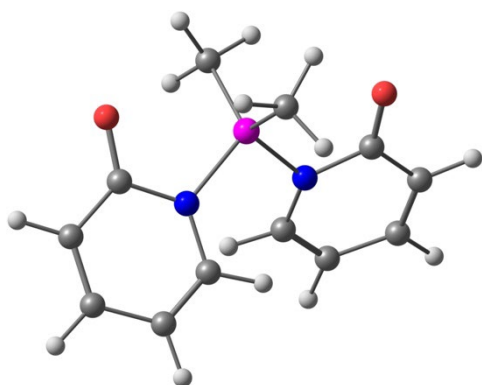

**Figure S34.** Optimized molecular structure of **2a'NN**.

PBE0:

final single point energy: -1016.17722689273 a.u.

final Gibbs free energy: -1015.97658705 a.u.

B2T-PLYP:

final single point energy: -1016.30548514771 a.u.

**Table S16.** Atomic coordinates for optimized structure of **2a'NN**.

|    |                   |                   |                   |
|----|-------------------|-------------------|-------------------|
| Si | 9.57433241237193  | 11.50746956685402 | 8.51082418644479  |
| O  | 7.59443175108664  | 9.80143969809789  | 9.44836991891977  |
| O  | 12.08866503376629 | 12.54482528862138 | 8.08677449372070  |
| N  | 7.87168423549381  | 11.39761514392089 | 7.87791066875316  |
| N  | 9.94142129783863  | 13.22731262774095 | 8.04550270092592  |
| C  | 7.08913832753927  | 10.44446808517984 | 8.52430864715952  |
| C  | 5.74984978910897  | 10.28435658913450 | 8.03512845450007  |
| H  | 5.11214595753428  | 9.59425459385460  | 8.57110347773929  |
| C  | 5.33455004317069  | 10.93449256436435 | 6.91695761208189  |
| H  | 4.32862476824374  | 10.77870917969031 | 6.54369121136478  |
| C  | 6.21055522093172  | 11.80007499958244 | 6.22253653555006  |
| H  | 5.91276897285099  | 12.29797374457634 | 5.31133856621979  |
| C  | 7.45286217347038  | 11.99818914041534 | 6.72914097842295  |
| H  | 8.16755548176020  | 12.64427810087359 | 6.23720820151729  |
| C  | 11.30291946315027 | 13.48017607550034 | 7.90749385688558  |
| C  | 11.66978144990777 | 14.82801690720103 | 7.58295383012512  |
| H  | 12.71940802214738 | 15.02250441601572 | 7.40805114195327  |
| C  | 10.73612199663305 | 15.81469543212988 | 7.55577297944803  |
| H  | 11.03421965814418 | 16.83431585766878 | 7.33903269229493  |
| C  | 9.37884378083788  | 15.52758602235000 | 7.82797742104946  |
| H  | 8.62742156127173  | 16.30332026647301 | 7.84831822789163  |
| C  | 9.02981598025726  | 14.23878455095721 | 8.06611583493903  |
| H  | 8.00790365371294  | 13.96029120578770 | 8.28564558183226  |
| C  | 9.74451803277400  | 11.52533701016609 | 10.34784290007122 |
| H  | 9.75644330395714  | 10.51757237845010 | 10.75640802978381 |
| H  | 8.91547495409221  | 12.07337413975000 | 10.79957548449670 |
| H  | 10.67749766653443 | 12.03574165903806 | 10.59804874554008 |
| C  | 10.46148080572280 | 10.21234333984703 | 7.54099658771260  |
| H  | 11.43927006256581 | 9.99723737478963  | 7.96575975241805  |
| H  | 10.59704592058758 | 10.54000379970043 | 6.50836805827836  |
| H  | 9.85149119653545  | 9.30593482026767  | 7.54118895495937  |

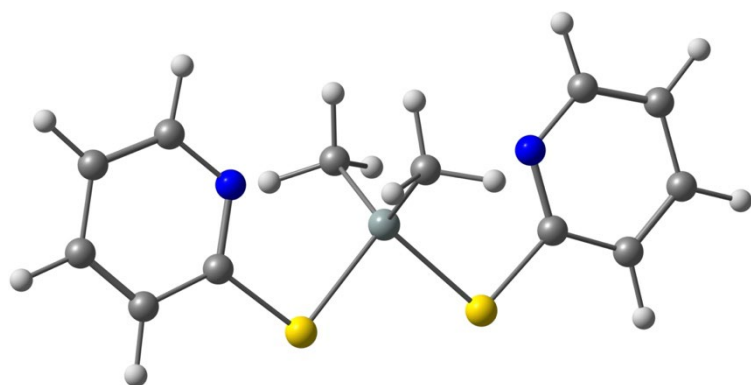

**Figure S35.** Optimized molecular structure of **2b<sup>SS</sup>**.

PBE0:

final single point energy: -1665.24690848091 a.u.

final Gibbs free energy: -1665.05356639 a.u.

B2T-PLYP:

final single point energy: -1665.30079264606 a.u.

**Table S17.** Atomic coordinates for optimized structure of **2b<sup>SS</sup>**.

|    |                   |                   |                   |
|----|-------------------|-------------------|-------------------|
| Si | 9.30390502839405  | 11.09662443302652 | 7.88902382175970  |
| S  | 7.92942001881526  | 12.24911917428762 | 6.63177122101662  |
| S  | 10.86912544321070 | 12.61789871251863 | 7.70073405190595  |
| N  | 6.81952812746695  | 10.01155116730602 | 7.45598916274852  |
| N  | 11.70555026733710 | 10.62964714910991 | 9.21507983415413  |
| C  | 6.59761765537694  | 11.11035902535675 | 6.74127055799389  |
| C  | 5.38062184944695  | 11.36608691997191 | 6.10864384418943  |
| H  | 5.24097123387449  | 12.27342299886609 | 5.53572886819119  |
| C  | 4.37127982481148  | 10.43279884975703 | 6.24011502422519  |
| H  | 3.41272792060731  | 10.60049536068885 | 5.76352841138823  |
| C  | 4.59626037137931  | 9.28240408608682  | 6.98726838619625  |
| H  | 3.82852357781862  | 8.53045300773628  | 7.11208831060068  |
| C  | 5.83791719781304  | 9.12048793287512  | 7.57383829558952  |
| H  | 6.06257263707128  | 8.23971065740668  | 8.16695668666379  |
| C  | 12.05270106297374 | 11.81209960808448 | 8.71631665767256  |
| C  | 13.28852563471021 | 12.40758757947217 | 8.97335288640670  |
| H  | 13.52959895015895 | 13.37270138307445 | 8.54736452439203  |
| C  | 14.18058661949792 | 11.73203325478456 | 9.78211066417393  |
| H  | 15.14831263007300 | 12.16638107196513 | 10.00342799386590 |
| C  | 13.82454883980959 | 10.49504473620680 | 10.30722479035730 |
| H  | 14.49720484427127 | 9.93713859095270  | 10.94492047272544 |
| C  | 12.57602387911760 | 9.99015099497209  | 9.99330353733808  |
| H  | 12.25198202077895 | 9.02935178737015  | 10.38051784789850 |
| C  | 8.68144079511317  | 11.03300199828668 | 9.64572103167963  |
| H  | 8.65060588247869  | 9.99671124413278  | 9.98481533745055  |
| H  | 7.67573170967294  | 11.44882100057134 | 9.70235404599640  |
| H  | 9.34339667789555  | 11.59782629960650 | 10.30138868799384 |
| C  | 9.82002207040550  | 9.52440009012321  | 7.02866015485688  |
| H  | 9.67490068581580  | 8.67669523453922  | 7.69966280464382  |
| H  | 10.87242497760989 | 9.57520362871803  | 6.75079882668143  |
| H  | 9.21671256619350  | 9.37016402214503  | 6.13438525924353  |

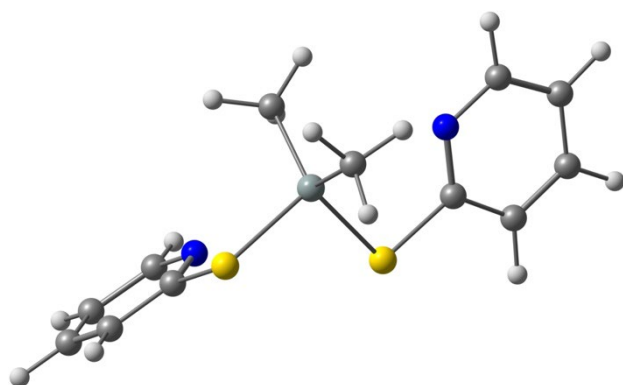

**Figure S36.** Optimized molecular structure of **2b<sup>SC</sup>**.

PBE0:

final single point energy: -1665.24605991582 a.u.

final Gibbs free energy: -1665.05372524 a.u.

B2T-PLYP:

final single point energy: -1665.30081142176 a.u.

**Table S18.** Atomic coordinates for optimized structure of **2b<sup>SC</sup>**.

|    |                   |                  |                   |
|----|-------------------|------------------|-------------------|
| Si | -1.87035557416757 | 3.04164329214161 | 2.28278457245907  |
| S  | -1.17270529856306 | 1.59637777385906 | 0.81865364685736  |
| S  | 0.00767232019607  | 3.74520830109170 | 3.10543890267737  |
| N  | -0.45785986590877 | 3.89726467521028 | -0.33748391804613 |
| N  | -1.94528921059982 | 4.91383547312479 | 4.45564344910439  |
| C  | -0.50449120136237 | 2.58009250304773 | -0.48303631983076 |
| C  | -0.04367752715379 | 1.92538127968351 | -1.62705345363188 |
| H  | -0.10302655339022 | 0.84722567867412 | -1.70128657633386 |
| C  | 0.48373309643064  | 2.68909000721197 | -2.64904143102653 |
| H  | 0.85039784382473  | 2.21179425064871 | -3.55003426223365 |
| C  | 0.53632176769670  | 4.06994412324732 | -2.50632231842112 |
| H  | 0.94208579035226  | 4.70421307804345 | -3.28330201631576 |
| C  | 0.05226643684517  | 4.61953903548726 | -1.33295368111085 |
| H  | 0.07316760420557  | 5.69361069206243 | -1.17617632426593 |
| C  | -0.62448560837286 | 4.82251801807031 | 4.34318217466017  |
| C  | 0.25575368909774  | 5.53919510850306 | 5.15497962815955  |
| H  | 1.32537788006142  | 5.43454340211230 | 5.02805140920396  |
| C  | -0.27806857248330 | 6.37774573962262 | 6.11347501300044  |
| H  | 0.37734374302790  | 6.94834898292318 | 6.76071559066481  |
| C  | -1.65849859672852 | 6.48159525206967 | 6.23598339279799  |
| H  | -2.11395356484504 | 7.12881167465921 | 6.97366673534092  |
| C  | -2.44454131044425 | 5.72840279554539 | 5.38291367517054  |
| H  | -3.52751689232008 | 5.77560911852981 | 5.44056943581597  |
| C  | -2.75423835879798 | 1.89946548944724 | 3.45793628210709  |
| H  | -3.64109610472462 | 1.49016166619939 | 2.96737540382867  |
| H  | -3.06594182241870 | 2.45023914449231 | 4.34483488889427  |
| H  | -2.11165477555894 | 1.07175186470416 | 3.76130015086893  |
| C  | -2.96681365780212 | 4.34133811157749 | 1.52991131066730  |
| H  | -2.40555671445812 | 5.24886271811399 | 1.31623121198381  |
| H  | -3.77232115304745 | 4.57261606622876 | 2.22755057794715  |
| H  | -3.39110344359055 | 3.96708849966699 | 0.59651863200663  |

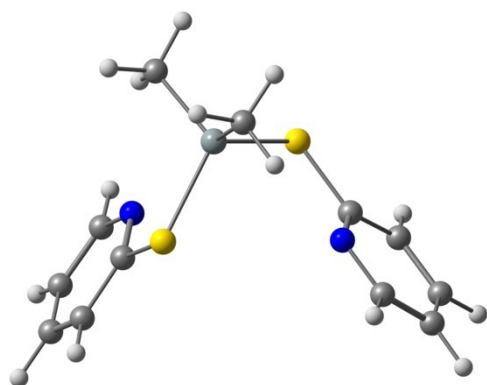

**Figure S37.** Optimized molecular structure of **2b<sup>CC</sup>**.

PBE0:

final single point energy: -1665.24463070467 a.u.

final Gibbs free energy: -1665.05251403 a.u.

B2T-PLYP:

final single point energy: -1665.29950463299 a.u.

**Table S19.** Atomic coordinates for optimized structure of **2b<sup>CC</sup>**.

|    |                   |                   |                   |
|----|-------------------|-------------------|-------------------|
| Si | -1.62310312288637 | 2.49682397557066  | 2.46102914792733  |
| S  | -0.92485238338964 | 1.15149050325388  | 0.92505106105043  |
| S  | -0.11611446338402 | 3.87975889128979  | 3.15153417258249  |
| N  | -0.67893151965557 | 3.49227495989826  | -0.35671429896015 |
| N  | 1.07757222886179  | 1.54307705501198  | 3.68164962543325  |
| C  | -0.56825653970739 | 2.17639027742359  | -0.46651584787846 |
| C  | -0.16653507382459 | 1.54328019143189  | -1.64488175256860 |
| H  | -0.09007398117713 | 0.46443446260043  | -1.68745736410467 |
| C  | 0.12555414172960  | 2.32883144148229  | -2.74202045056434 |
| H  | 0.43849662730649  | 1.86841553153981  | -3.67161036436289 |
| C  | 0.01241832419614  | 3.70934053506750  | -2.63709480620656 |
| H  | 0.23226970020264  | 4.36057128378526  | -3.47271992597189 |
| C  | -0.39298455273657 | 4.23571886324873  | -1.42397116532803 |
| H  | -0.49539536186783 | 5.30874682726603  | -1.29429024382900 |
| C  | 1.26199991028377  | 2.84860319141713  | 3.54268271697180  |
| C  | 2.50826802965211  | 3.46002834953422  | 3.68959797489917  |
| H  | 2.61124318913232  | 4.52931448328025  | 3.55819678979244  |
| C  | 3.59525467632147  | 2.66415431678038  | 3.99334550081304  |
| H  | 4.57681617938349  | 3.10723714768020  | 4.11260116092225  |
| C  | 3.41405746201418  | 1.29429427674967  | 4.13249749394861  |
| H  | 4.23982881792905  | 0.63460906828285  | 4.36414896279363  |
| C  | 2.13753886081213  | 0.78833840130567  | 3.96422380280485  |
| H  | 1.94850889653797  | -0.27628749419050 | 4.06126180174267  |
| C  | -2.21289593556401 | 1.32547471492679  | 3.77917693143244  |
| H  | -3.08606872406634 | 0.77688738221285  | 3.41809154272040  |
| H  | -2.50359132337581 | 1.89714372044468  | 4.66341305369950  |
| H  | -1.43094986039429 | 0.62228678844517  | 4.05943500432540  |
| C  | -2.99489666905106 | 3.62604418321324  | 1.91491915228458  |
| H  | -2.64823106482179 | 4.34077579201587  | 1.17171975531041  |
| H  | -3.38501722737205 | 4.16399529919453  | 2.78280223989207  |
| H  | -3.80527724108871 | 3.03271057983679  | 1.48604732842779  |



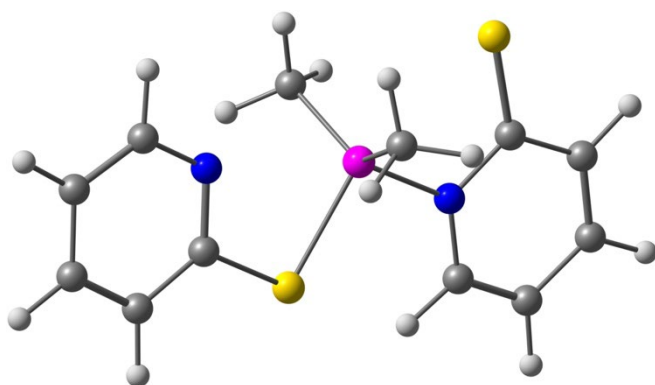

**Figure S38.** Optimized molecular structure of **2b**<sup>NS</sup>.

PBE0:

final single point energy: -1665.24480081193 a.u.

final Gibbs free energy: -1665.04945783 a.u.

B2T-PLYP:

final single point energy: -1665.29773202014 a.u.

**Table S20.** Atomic coordinates for optimized structure of **2b**<sup>NS</sup>.

|    |                   |                   |                   |
|----|-------------------|-------------------|-------------------|
| Si | 9.53200321439334  | 11.61264395954216 | 8.61136005379728  |
| S  | 8.92979733299729  | 10.15627403421036 | 7.05902675146935  |
| S  | 11.25493540191066 | 13.35426681894973 | 10.16059290313195 |
| N  | 6.89809768321431  | 10.81759772330770 | 8.60216114403384  |
| N  | 11.30863364649139 | 11.73811668021835 | 8.09363270239786  |
| C  | 7.25620107139789  | 10.05276525312035 | 7.57630953180790  |
| C  | 6.36715580069810  | 9.19906907229446  | 6.92237776975442  |
| H  | 6.70158498086262  | 8.59217591277135  | 6.09120631975283  |
| C  | 5.06130984924499  | 9.15601930975398  | 7.36877447321237  |
| H  | 4.34418019244280  | 8.50425242483949  | 6.88402403084685  |
| C  | 4.67912154723500  | 9.95395465462203  | 8.44104461557924  |
| H  | 3.66491120273284  | 9.94688902437138  | 8.81752662376723  |
| C  | 5.63608734417145  | 10.76511659838955 | 9.02249802527448  |
| H  | 5.38748963588646  | 11.40475077732246 | 9.86314503179579  |
| C  | 12.04374240231521 | 12.57913152786947 | 8.88903413243909  |
| C  | 13.41499608789080 | 12.74162909584834 | 8.58766139313239  |
| H  | 13.99090355405057 | 13.40350075891389 | 9.21931448345901  |
| C  | 13.98235828763405 | 12.08366915103741 | 7.53389167772304  |
| H  | 15.03477662386012 | 12.21744128568397 | 7.31346236062697  |
| C  | 13.19725783711999 | 11.23569251107438 | 6.73614036531542  |
| H  | 13.61056030047859 | 10.70181214349602 | 5.89272535689517  |
| C  | 11.87900807233479 | 11.09268693265764 | 7.04798953869088  |
| H  | 11.23391632567775 | 10.45322647082154 | 6.46288253028319  |
| C  | 8.69275174637981  | 13.21837929768750 | 8.19443141764302  |
| H  | 8.20988895742413  | 13.62598692452679 | 9.08223182106413  |
| H  | 7.93985381307130  | 13.05389573791357 | 7.42342062887279  |
| H  | 9.42888611891879  | 13.94160008411555 | 7.84232717256095  |
| C  | 9.44367713897551  | 10.70009462787663 | 10.23120020220626 |
| H  | 8.93713612867422  | 11.31257868556930 | 10.97651430778890 |
| H  | 10.45083501326026 | 10.48788264519698 | 10.59180970846443 |
| H  | 8.89740935225473  | 9.76549337299742  | 10.10368495421282 |



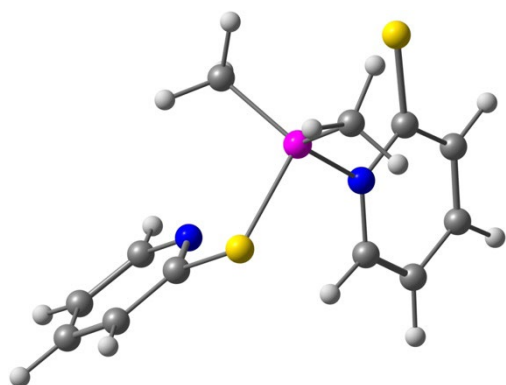

**Figure S39.** Optimized molecular structure of **2b**<sup>SC</sup>.

PBE0:

final single point energy: -1665.24724112912 a.u.

final Gibbs free energy: -1665.05203345 a.u.

B2T-PLYP:

final single point energy: -1665.3000924499 a.u.

**Table S21.** Atomic coordinates for optimized structure of **2b**<sup>SC</sup>.

|    |                   |                   |                  |
|----|-------------------|-------------------|------------------|
| Si | -2.07607311719392 | 3.44307057061319  | 2.26096521136884 |
| S  | -2.08745895640587 | 1.35191201628880  | 1.58932660691129 |
| S  | -2.04021422332656 | 5.88064290471620  | 3.81595687636466 |
| N  | 0.42356786757824  | 1.64949989361061  | 2.42607879001250 |
| N  | -1.79113817119596 | 3.28987401868000  | 4.07082627652236 |
| C  | -0.38861741220691 | 0.89554503142118  | 1.69450184285906 |
| C  | 0.04118194466686  | -0.24814798265636 | 1.01944079698314 |
| H  | -0.65697855836700 | -0.82998685196029 | 0.43191415159576 |
| C  | 1.37174785860781  | -0.60377512999709 | 1.11793677464332 |
| H  | 1.73801348386226  | -1.48510929951184 | 0.60503830542404 |
| C  | 2.23050875976471  | 0.18407259175771  | 1.87431430733513 |
| H  | 3.28028154829217  | -0.05835249607664 | 1.97325367324523 |
| C  | 1.70561426638298  | 1.29741146499328  | 2.50451578165873 |
| H  | 2.33825181030254  | 1.94240458487480  | 3.10609793513861 |
| C  | -1.75783362371484 | 4.49130149044613  | 4.72740727769290 |
| C  | -1.49785965530114 | 4.47411325322976  | 6.11487565716667 |
| H  | -1.45882876196194 | 5.42287338084743  | 6.63156960175123 |
| C  | -1.31185545814915 | 3.29030241409495  | 6.77254514430724 |
| H  | -1.11737864927093 | 3.28879843166601  | 7.83865201669121 |
| C  | -1.37709562228207 | 2.07774511635743  | 6.06793775916346 |
| H  | -1.24130813866970 | 1.12547923651858  | 6.55979736257813 |
| C  | -1.61290608804632 | 2.12024124730918  | 4.72667657804623 |
| H  | -1.67654118463308 | 1.22955551523855  | 4.11910281101123 |
| C  | -3.85698412192426 | 3.81660716073674  | 1.87046859833046 |
| H  | -4.08833825429355 | 3.43696148430960  | 0.87233041116969 |
| H  | -4.05752218099872 | 4.88468605535654  | 1.90523016823428 |
| H  | -4.51270551633855 | 3.31358756270535  | 2.58426270184266 |
| C  | -0.72849015222629 | 4.30361056162910  | 1.31495869773028 |
| H  | 0.09338519402574  | 4.57139021432327  | 1.97658635567572 |
| H  | -1.13261634360049 | 5.21789828159778  | 0.87937724351006 |
| H  | -0.35067800537598 | 3.65350420487991  | 0.52482683303573 |

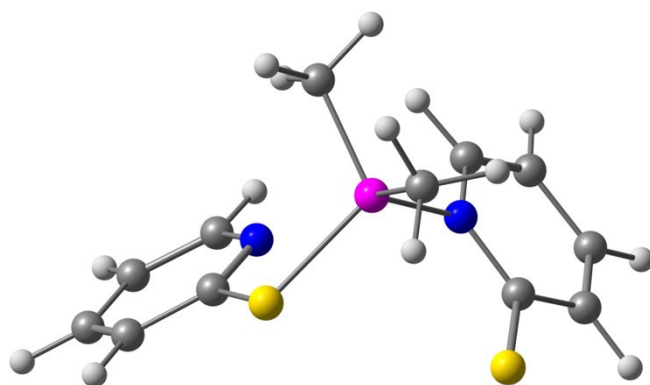

**Figure S40.** Optimized molecular structure of **2b**<sup>CC</sup>.

PBE0:

final single point energy: -1665.24229063867 a.u.

final Gibbs free energy: -1665.0474898 a.u.

B2T-PLYP:

final single point energy: -1665.29616506502 a.u.

**Table S22.** Atomic coordinates for optimized structure of **2b**<sup>CC</sup>.

|    |                   |                  |                  |
|----|-------------------|------------------|------------------|
| Si | -1.87237413540471 | 3.40357483346653 | 2.16287351418725 |
| S  | -0.38023152999477 | 4.68088154754175 | 1.29018084058596 |
| S  | 0.62634172976853  | 2.03565593766643 | 3.46311487669520 |
| N  | -1.54240415530808 | 6.30471748108903 | 3.06339603824964 |
| N  | -1.67343449738672 | 3.26383105140748 | 3.97005191374111 |
| C  | -0.75223890511118 | 6.25183552552264 | 1.99918392498806 |
| C  | -0.15944375400229 | 7.38257819713603 | 1.43529984724458 |
| H  | 0.47719098928506  | 7.29025417792032 | 0.56493996542002 |
| C  | -0.40877062729754 | 8.60860968466218 | 2.01930312957195 |
| H  | 0.03787018689500  | 9.50606453380646 | 1.60827459101076 |
| C  | -1.23803461787381 | 8.67538624736036 | 3.13194073549103 |
| H  | -1.45780309706780 | 9.61682922485754 | 3.61757404453718 |
| C  | -1.77998477119300 | 7.49585229578182 | 3.60896405700267 |
| H  | -2.43427608685041 | 7.49761167755715 | 4.47537318011364 |
| C  | -0.54914662062618 | 2.65982520161069 | 4.48697474846658 |
| C  | -0.44271547336717 | 2.60515102510252 | 5.90060529577026 |
| H  | 0.43650590866192  | 2.12677986368372 | 6.30875305752712 |
| C  | -1.40403372414666 | 3.13619060824452 | 6.70821003992978 |
| H  | -1.29777401222401 | 3.08258949261406 | 7.78529955432858 |
| C  | -2.53005407946573 | 3.75775258647524 | 6.13863358401155 |
| H  | -3.31009653322522 | 4.19494740491346 | 6.74500613202917 |
| C  | -2.62025665552874 | 3.80274998896258 | 4.78404100281629 |
| H  | -3.45302879041510 | 4.27714338406010 | 4.28890923287232 |
| C  | -1.80025874470615 | 1.75916575339373 | 1.30043740277916 |
| H  | -2.57287646771902 | 1.73486113044308 | 0.52758857951411 |
| H  | -1.99639555641893 | 0.95859803197717 | 2.01642068892402 |
| H  | -0.82788596162642 | 1.57062213849620 | 0.85124925319797 |
| C  | -3.57024345743046 | 4.10971911050558 | 1.87571174273682 |
| H  | -3.71567963888652 | 5.10775981388487 | 2.28319086426267 |
| H  | -4.33649676016087 | 3.43799222839736 | 2.27211822292268 |
| H  | -3.70318954917296 | 4.15765148345931 | 0.79208121707179 |

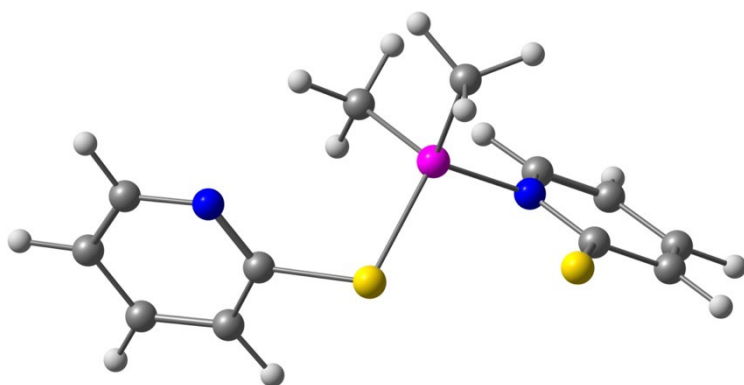

**Figure S41.** Optimized molecular structure of **2b**<sup>NC</sup>.

PBE0:

final single point energy: -1665.24162347115 a.u.

final Gibbs free energy: -1665.04672803 a.u.

B2T-PLYP:

final single point energy: -1665.29586316274 a.u.

**Table S23.** Atomic coordinates for optimized structure of **2b**<sup>NC</sup>.

|    |                   |                  |                   |
|----|-------------------|------------------|-------------------|
| Si | -1.18702227640727 | 2.82330854353010 | 3.53150806227135  |
| S  | -0.47994629811277 | 4.71650497245610 | 4.25335490797735  |
| S  | -3.53550169041051 | 4.06574904825134 | 4.82045403628031  |
| N  | 2.06964207898258  | 3.88770328592139 | 4.13263360778758  |
| N  | -2.68793097337662 | 3.14589097434281 | 2.51947457474303  |
| C  | 1.19045574698878  | 4.74331658716697 | 3.62187289394397  |
| C  | 1.52999194908962  | 5.70018095819697 | 2.66967124154544  |
| H  | 0.77494067518977  | 6.37245370171312 | 2.28468996576736  |
| C  | 2.84224093006160  | 5.76221834207053 | 2.23363276190914  |
| H  | 3.13830398037314  | 6.49611467949940 | 1.49353856936929  |
| C  | 3.76366647687745  | 4.86748222995287 | 2.75430120502988  |
| H  | 4.79980940027855  | 4.87706394012063 | 2.44185479574256  |
| C  | 3.32501385434171  | 3.95094412657682 | 3.69672803506646  |
| H  | 4.01587428551303  | 3.23370655305154 | 4.12885363055987  |
| C  | -3.74036697622160 | 3.71682754052895 | 3.18719240491029  |
| C  | -4.91714758437306 | 3.97941200050222 | 2.44988904008017  |
| H  | -5.74948383968395 | 4.42692653743324 | 2.97481816118919  |
| C  | -4.98770828684104 | 3.68225228694820 | 1.11824939823035  |
| H  | -5.89491050817208 | 3.89273424110352 | 0.56431331263876  |
| C  | -3.88388394435943 | 3.10702158630578 | 0.46666898188409  |
| H  | -3.90705906340506 | 2.86237242919667 | -0.58537776880526 |
| C  | -2.76239312443979 | 2.85720597021055 | 1.19760318869542  |
| H  | -1.88075327727550 | 2.41714855483658 | 0.75611985788251  |
| C  | -1.49511284026311 | 1.49737432485048 | 4.79784659470461  |
| H  | -0.68735628417131 | 0.76326123049353 | 4.74462462276204  |
| H  | -2.44181100816437 | 0.99115793164104 | 4.59900806258124  |
| H  | -1.53799534195712 | 1.91482635884800 | 5.80155459564470  |
| C  | 0.03271078557189  | 2.16347710764389 | 2.28380069624983  |
| H  | 0.27051010043285  | 2.86812132625625 | 1.48557324259162  |
| H  | -0.34465531457700 | 1.23596159058943 | 1.84506254842121  |
| H  | 0.95721601251066  | 1.92643295976091 | 2.81183828334551  |

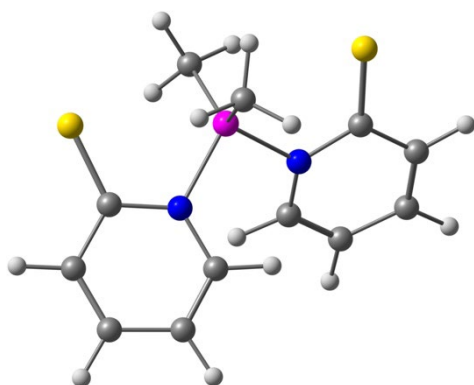

**Figure S42.** Optimized molecular structure of **2b''<sup>NN</sup>**.

PBE0:

final single point energy: -1665.23376168991 a.u.

final Gibbs free energy: -1665.0372234 a.u.

B2T-PLYP:

final single point energy: -1665.28641176546 a.u.

**Table S24.** Atomic coordinates for optimized structure of **2b''<sup>NN</sup>**.

|    |                   |                   |                   |
|----|-------------------|-------------------|-------------------|
| Si | 9.63477445202229  | 11.43329063080587 | 8.56184646212070  |
| S  | 7.63823337994136  | 9.46519573674433  | 9.68772092442686  |
| S  | 12.46330198159912 | 12.37263972897466 | 8.12373124151869  |
| N  | 7.90053465751839  | 11.37978882075119 | 7.89651671977613  |
| N  | 9.96153483565432  | 13.19244734799991 | 8.05581909445967  |
| C  | 7.04986114357456  | 10.47308561352528 | 8.47754193439605  |
| C  | 5.72997662500005  | 10.39841829969106 | 7.96779948782245  |
| H  | 5.03931715266329  | 9.73771531028223  | 8.47295371580643  |
| C  | 5.36963507892185  | 11.08978364813205 | 6.84809723699158  |
| H  | 4.36429827635046  | 11.00119030881791 | 6.45392814459590  |
| C  | 6.31887135971333  | 11.89028739933807 | 6.18806924056481  |
| H  | 6.08870029974234  | 12.40946783068643 | 5.26898381277796  |
| C  | 7.55545471396510  | 12.00812319711390 | 6.74110362528183  |
| H  | 8.32256601220982  | 12.61034864147727 | 6.27588701698159  |
| C  | 11.27591008392890 | 13.53364253460630 | 7.86032916930703  |
| C  | 11.55506143453504 | 14.87695655094072 | 7.50727220762945  |
| H  | 12.58230366258576 | 15.12840025711923 | 7.28275663332485  |
| C  | 10.57184406906243 | 15.82275001713662 | 7.51134066637389  |
| H  | 10.80632138965346 | 16.85187976757237 | 7.26666268013601  |
| C  | 9.26026438929530  | 15.46250190399780 | 7.86839098527382  |
| H  | 8.46518355611033  | 16.19098233106822 | 7.93501523347574  |
| C  | 9.00157757553201  | 14.15270714646069 | 8.12667675108872  |
| H  | 8.01130099132826  | 13.82134479964490 | 8.40464114081756  |
| C  | 9.84255448984000  | 11.62580624933759 | 10.39211585526561 |
| H  | 10.12275575643355 | 10.68248364589068 | 10.85525880782946 |
| H  | 8.90497687120861  | 11.95791041494278 | 10.84129108152764 |
| H  | 10.61746324168406 | 12.37276133799060 | 10.57541581147747 |
| C  | 10.37399002248227 | 10.08362881036658 | 7.53111251169760  |
| H  | 11.23928111178704 | 9.64587664224803  | 8.02363264122294  |
| H  | 10.69716980465628 | 10.48411630533186 | 6.56882913141142  |
| H  | 9.61322455500003  | 9.31716335000437  | 7.36960576761977  |

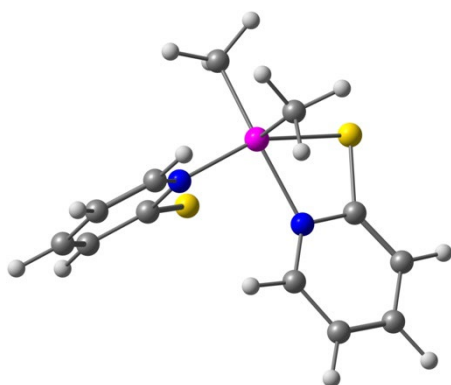

**Figure S43.** Optimized molecular structure of **2b''SSiScis**.

PBE0:

final single point energy: -1665.24731238844 a.u.

final Gibbs free energy: -1665.05085854 a.u.

B2T-PLYP:

final single point energy: -1665.29594621735 a.u.

**Table S25.** Atomic coordinates for optimized structure of **2b''SSiScis**.

|    |                   |                   |                   |
|----|-------------------|-------------------|-------------------|
| Si | 9.83791517599673  | 11.55627434593158 | 8.45060887894532  |
| S  | 9.55018297793415  | 11.25570024065686 | 5.79851860164985  |
| S  | 12.18628793465957 | 11.74420475970541 | 8.24194118269591  |
| N  | 8.14434436208677  | 10.86648118354229 | 7.90920596146077  |
| N  | 10.62452696447264 | 9.78295392834877  | 8.19242572470204  |
| C  | 8.10578824777060  | 10.78859123282846 | 6.55386882925016  |
| C  | 6.92159955792964  | 10.34577339911674 | 5.93780976371533  |
| H  | 6.88881380849697  | 10.27878359377359 | 4.85916075820140  |
| C  | 5.83959692736939  | 10.01181124878696 | 6.71274627911327  |
| H  | 4.92511856429509  | 9.67045568765514  | 6.24199607462216  |
| C  | 5.91159661725372  | 10.11038616202421 | 8.10837722938498  |
| H  | 5.07196427853313  | 9.85492458188821  | 8.73879780470753  |
| C  | 7.08487839609557  | 10.54325030658014 | 8.66706442539977  |
| H  | 7.21387383262841  | 10.64281833253513 | 9.73609435408960  |
| C  | 11.94308340418258 | 10.05232142919713 | 8.14903386189335  |
| C  | 12.86624857484992 | 9.01219327717762  | 8.03417988221999  |
| H  | 13.92416263883308 | 9.23171374253733  | 7.99753962479951  |
| C  | 12.39035723816343 | 7.72049231456990  | 7.96704248901890  |
| H  | 13.08707605600633 | 6.89615214618990  | 7.87278937796563  |
| C  | 11.01767497728581 | 7.46754175529185  | 8.02154888025131  |
| H  | 10.62777422025295 | 6.46078853342020  | 7.97207473868192  |
| C  | 10.15889755137550 | 8.53455771483241  | 8.13875485186160  |
| H  | 9.08400576743714  | 8.41513406792476  | 8.18381927290591  |
| C  | 9.48252913048315  | 13.39920615390007 | 8.21573670579266  |
| H  | 9.94040499925412  | 13.92659169658983 | 9.05848027266705  |
| H  | 8.40779650273030  | 13.59766383702276 | 8.23516903454748  |
| H  | 9.89547664712035  | 13.79536489458788 | 7.29066726817884  |
| C  | 9.65123637826122  | 11.33533162001454 | 10.32300517457331 |
| H  | 8.85930916601205  | 11.98815720275054 | 10.70097483051998 |
| H  | 10.57532261534241 | 11.62419749153192 | 10.82566525343239 |
| H  | 9.41932097588649  | 10.30909525008704 | 10.61615309275141 |

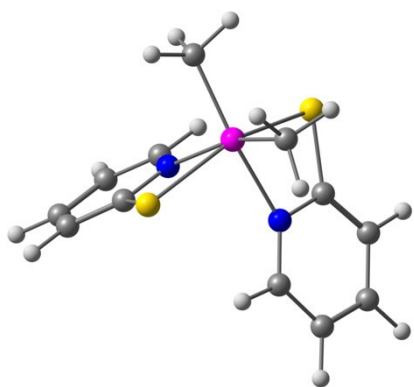

**Figure S44.** Optimized molecular structure of **2b''SiStrans**.

PBE0:

final single point energy: -1665.24680539603 a.u.

final Gibbs free energy: -1665.05072335 a.u.

B2T-PLYP:

final single point energy: -1665.29487879155 a.u.

**Table S26.** Atomic coordinates for optimized structure of **2b''SiStrans**.

|    |                   |                   |                   |
|----|-------------------|-------------------|-------------------|
| Si | 9.78637541480845  | 11.59583350066301 | 8.37755652779148  |
| S  | 11.01909438615789 | 9.58947089397710  | 8.52928019251180  |
| S  | 9.22540037236085  | 13.70214716901477 | 7.47333658699564  |
| N  | 10.13397051543578 | 10.83953078236385 | 6.52799999414474  |
| N  | 11.46341193086424 | 12.63718527669925 | 7.92350135178808  |
| C  | 10.79179693202304 | 9.70688477899152  | 6.82846635869934  |
| C  | 11.17990294959487 | 8.82603302680316  | 5.81914852325927  |
| H  | 11.70806181290078 | 7.91597945422412  | 6.06812681354487  |
| C  | 10.86877806639852 | 9.15099021308497  | 4.51494169753710  |
| H  | 11.16011615657823 | 8.48475239734364  | 3.71157071464945  |
| C  | 10.17812106630075 | 10.32784627746937 | 4.22702726782799  |
| H  | 9.92278381785795  | 10.59705158020372 | 3.21172077443282  |
| C  | 9.82193484423992  | 11.15212590554662 | 5.27200224389599  |
| H  | 9.28558058703133  | 12.08309716246579 | 5.13486102123288  |
| C  | 10.94304169617853 | 13.79225360547682 | 7.47560428372309  |
| C  | 11.77836362193495 | 14.84384284597657 | 7.09878713926886  |
| H  | 11.35340299567399 | 15.77111852165099 | 6.74008053229147  |
| C  | 13.14235495624244 | 14.66158764966173 | 7.19852688101578  |
| H  | 13.81354638921580 | 15.46167840396680 | 6.90961972821702  |
| C  | 13.65977459073742 | 13.45625124705155 | 7.67217978089979  |
| H  | 14.72517416828744 | 13.29596899298203 | 7.75984832521275  |
| C  | 12.77840766974644 | 12.46055579152215 | 8.03228311948609  |
| H  | 13.09717270502965 | 11.49666435460190 | 8.40938179818967  |
| C  | 8.01282061923457  | 10.90650907381434 | 8.34761118211198  |
| H  | 7.40088743753662  | 11.51423490953416 | 9.02048302485729  |
| H  | 7.97847205181972  | 9.87483416692246  | 8.70379946424779  |
| H  | 7.56386009705977  | 10.94382577735873 | 7.35360314032837  |
| C  | 9.96099470682629  | 12.05222321141323 | 10.21672656680866 |
| H  | 9.50191781577559  | 11.25460621198301 | 10.80806462430750 |
| H  | 9.43805934390662  | 12.98263081389902 | 10.44803637961830 |
| H  | 11.00096192524117 | 12.15326422033320 | 10.53128095210387 |

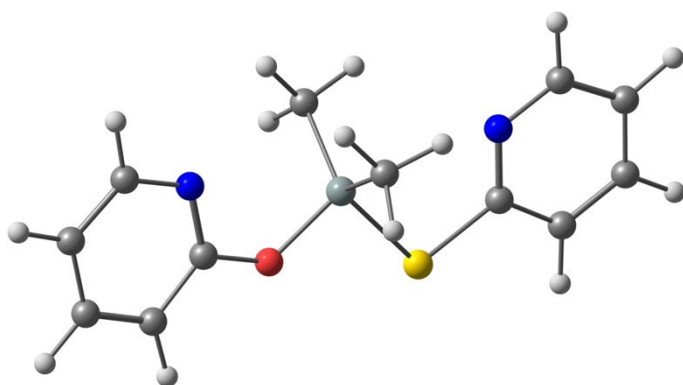

**Figure S45.** Optimized molecular structure of **2c<sup>SO</sup>**.

PBE0:

final single point energy: -1340.72427964441 a.u.

final Gibbs free energy: -1340.53014313 a.u.

B2T-PLYP:

final single point energy: -1340.81962797691 a.u.

**Table S27.** Atomic coordinates for optimized structure of **2c<sup>SO</sup>**.

|    |                   |                   |                   |
|----|-------------------|-------------------|-------------------|
| Si | 9.14289709666646  | 10.71519305281524 | 8.18102648078064  |
| O  | 7.90767118550110  | 11.45112297134044 | 7.28850391874845  |
| S  | 10.53446566423314 | 12.34778319700809 | 7.83212231012403  |
| N  | 6.47991170622731  | 9.70357917721572  | 7.60158637069778  |
| N  | 11.88977008200485 | 10.61265603495619 | 9.33226572893372  |
| C  | 6.73888462597212  | 10.86119184141136 | 7.01643641309164  |
| C  | 5.85697382610087  | 11.48926059756735 | 6.13474433110898  |
| H  | 6.12701534964639  | 12.43584630952931 | 5.68636182893403  |
| C  | 4.66039972407942  | 10.85980665775670 | 5.86451803944041  |
| H  | 3.95132438659918  | 11.31442181360831 | 5.18282027341069  |
| C  | 4.37541086182433  | 9.63944477675365  | 6.47027163647562  |
| H  | 3.44784289212647  | 9.11626101163096  | 6.28050239611043  |
| C  | 5.31777440652331  | 9.10822733876929  | 7.32840078534497  |
| H  | 5.14151491491997  | 8.15950531771603  | 7.82538590103961  |
| C  | 11.94235134335181 | 11.79683915168875 | 8.73352570645663  |
| C  | 13.06662986928401 | 12.62280668113856 | 8.78735127694694  |
| H  | 13.06456546715258 | 13.58049590234870 | 8.28318381889106  |
| C  | 14.16668795576390 | 12.18499660153600 | 9.49716203976336  |
| H  | 15.05427043705580 | 12.80340152332999 | 9.55861181962616  |
| C  | 14.11971060883512 | 10.94798120486953 | 10.12870324999109 |
| H  | 14.96005668623549 | 10.56934127064406 | 10.69524228345696 |
| C  | 12.95916132680915 | 10.20493621598570 | 10.01368719606882 |
| H  | 12.87548368928141 | 9.23260499275087  | 10.48908105636012 |
| C  | 8.66430349295419  | 10.58793493220390 | 9.96461210195839  |
| H  | 7.98112931959459  | 9.74895132059187  | 10.10462238673959 |
| H  | 8.16154888736503  | 11.50465874025702 | 10.27867577625145 |
| H  | 9.54775034056127  | 10.43908380753927 | 10.58413020053912 |
| C  | 9.69333284194667  | 9.15607194727559  | 7.34696296182453  |
| H  | 10.67455017257394 | 8.86224792115428  | 7.71791963580238  |
| H  | 9.75770366169650  | 9.31520503950888  | 6.26875181689971  |
| H  | 8.97964817711267  | 8.35451464909725  | 7.54119225818170  |

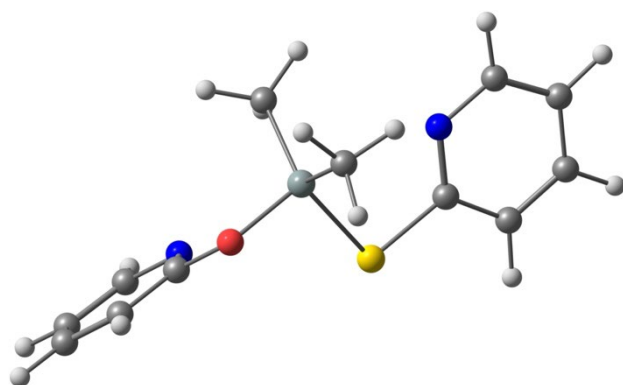

**Figure S46.** Optimized molecular structure of **2c<sup>OC</sup>**.

PBE0:

final single point energy: -1340.72398273724 a.u.

final Gibbs free energy: -1340.52768963 a.u.

B2T-PLYP:

final single point energy: -1340.81903271733 a.u.

**Table S28.** Atomic coordinates for optimized structure of **2c<sup>OC</sup>**.

|    |                   |                  |                   |
|----|-------------------|------------------|-------------------|
| Si | -1.73170800811380 | 3.29756119087068 | 2.11587247290658  |
| O  | -1.12543525384895 | 2.37993601126400 | 0.83383062066165  |
| S  | 0.10452881482097  | 4.13994895083278 | 2.93040554040990  |
| N  | -0.46531108452302 | 4.14327154446354 | -0.46051401058256 |
| N  | -1.92125475322972 | 4.90061200136427 | 4.44458063612342  |
| C  | -0.60205155314354 | 2.83752899134484 | -0.30859013112082 |
| C  | -0.22502381720856 | 1.90837599577354 | -1.28102039493414 |
| H  | -0.36056094231940 | 0.85134289023681 | -1.09562536018668 |
| C  | 0.31399493308607  | 2.38679742872878 | -2.45598408161146 |
| H  | 0.61826402776716  | 1.69627520781133 | -3.23364627404115 |
| C  | 0.46299874204586  | 3.75945800235733 | -2.63062030412531 |
| H  | 0.88267551329945  | 4.17240133739122 | -3.53809462600664 |
| C  | 0.05861101144611  | 4.58906845157701 | -1.60336699492763 |
| H  | 0.15672194434009  | 5.66653182942058 | -1.69169180234301 |
| C  | -0.59960752631952 | 4.95781467881982 | 4.31526018139191  |
| C  | 0.21908475917497  | 5.63695857470477 | 5.21871504158316  |
| H  | 1.29158423917217  | 5.65866836511954 | 5.07620565524335  |
| C  | -0.37930401089606 | 6.27367928635542 | 6.28805038009331  |
| H  | 0.22724939930822  | 6.81002748520069 | 7.00812554768893  |
| C  | -1.76078184405070 | 6.21903204034167 | 6.42957259285942  |
| H  | -2.26470877865732 | 6.70585864663063 | 7.25390786663492  |
| C  | -2.48327036978103 | 5.51921082096810 | 5.48062464901175  |
| H  | -3.56435379540037 | 5.44756081491949 | 5.54775831755677  |
| C  | -2.42816552820099 | 1.96305515617557 | 3.19734993384639  |
| H  | -3.25640484814191 | 1.47532551620204 | 2.67594834381879  |
| H  | -2.79663824641552 | 2.36903502289872 | 4.13753706107538  |
| H  | -1.66551357588807 | 1.21141647770251 | 3.40716145080402  |
| C  | -2.97310156846530 | 4.52818113312381 | 1.49570665672654  |
| H  | -2.50233401220577 | 5.48240015421159 | 1.26360774393241  |
| H  | -3.74660649072765 | 4.68512540943215 | 2.24714141347471  |
| H  | -3.43265301192378 | 4.14105439975656 | 0.58281765703594  |



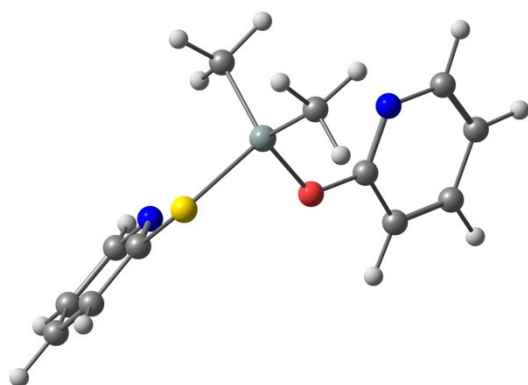

**Figure S47.** Optimized molecular structure of **2c<sup>SC</sup>**.

PBE0:

final single point energy: -1340.7228854534 a.u.

final Gibbs free energy: -1340.52687392 a.u.

B2T-PLYP:

final single point energy: -1340.81852096013 a.u.

**Table S29.** Atomic coordinates for optimized structure of **2c<sup>SC</sup>**.

|    |                   |                  |                   |
|----|-------------------|------------------|-------------------|
| Si | -2.28045766879936 | 2.94739850821653 | 2.27888694072664  |
| S  | -1.43313743956675 | 1.62903368398765 | 0.78963873091878  |
| O  | -0.92842170274777 | 3.68437985867195 | 2.95115135535222  |
| N  | -0.69779093832928 | 4.03175751161075 | -0.12910211220975 |
| N  | -2.14462599190965 | 4.85821854308127 | 4.48125099329943  |
| C  | -0.53732083859609 | 2.72278319411443 | -0.26971359776760 |
| C  | 0.31702795558880  | 2.16091013791019 | -1.22014144847282 |
| H  | 0.41936647358974  | 1.08621009686543 | -1.29668577025703 |
| C  | 1.02786830089131  | 3.01080382364998 | -2.04471339866490 |
| H  | 1.70159768582028  | 2.60616282749405 | -2.79070074448360 |
| C  | 0.87178650452006  | 4.38315912335475 | -1.90029779311179 |
| H  | 1.41298768396321  | 5.08326073446189 | -2.52299105039567 |
| C  | -0.00259945738393 | 4.83756054675418 | -0.92922396420599 |
| H  | -0.15747173110356 | 5.90172330705285 | -0.78022160290442 |
| C  | -0.97705250733090 | 4.61513046658441 | 3.90981217498445  |
| C  | 0.20238555968713  | 5.27438581904883 | 4.26120019902192  |
| H  | 1.12611941039635  | 5.03113976865115 | 3.75380746671912  |
| C  | 0.13507228775867  | 6.22605445853878 | 5.25635513772961  |
| H  | 1.02895043429983  | 6.75977060391471 | 5.55677354964774  |
| C  | -1.08680113024602 | 6.49389138943127 | 5.86689467588210  |
| H  | -1.17754447077146 | 7.23358260475550 | 6.65089821492182  |
| C  | -2.19181579025677 | 5.78370122013719 | 5.44114390238655  |
| H  | -3.16650881655668 | 5.95738955282668 | 5.88595622206335  |
| C  | -3.04117672606978 | 1.73202808749572 | 3.45741686607893  |
| H  | -3.78345078769818 | 1.11813113164884 | 2.94199766019010  |
| H  | -3.53641551527340 | 2.26668394796768 | 4.26913798903442  |
| H  | -2.28352791756274 | 1.07209808369063 | 3.88339918887175  |
| C  | -3.50308540557301 | 4.15076971921603 | 1.58154243439099  |
| H  | -2.99705528425470 | 4.94363572707050 | 1.03328505902310  |
| H  | -4.09399682130793 | 4.58524385144096 | 2.38882476521297  |
| H  | -4.17198099017738 | 3.62651548635481 | 0.89544373901741  |

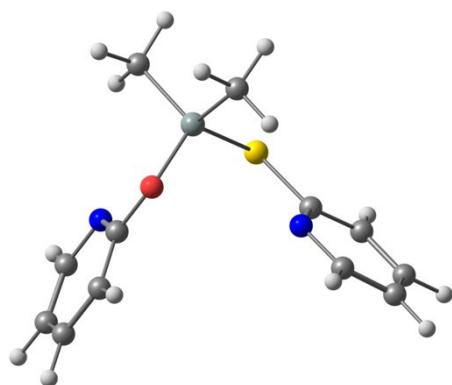

**Figure S48.** Optimized molecular structure of **2c<sup>CC</sup>**.

PBE0:

final single point energy: -1340.72349256371 a.u.

final Gibbs free energy: -1340.52770266 a.u.

B2T-PLYP:

final single point energy: -1340.81895132914 a.u.

**Table S30.** Atomic coordinates for optimized structure of **2c<sup>CC</sup>**.

|    |                   |                   |                   |
|----|-------------------|-------------------|-------------------|
| Si | -1.67836602428964 | 2.63114978460606  | 2.32834775922336  |
| O  | -1.24058429609468 | 1.80727120771344  | 0.93894880213447  |
| S  | -0.14764836580274 | 3.98719555048623  | 3.02157094458258  |
| N  | -0.87324221668383 | 3.62688971423884  | -0.39625696455891 |
| N  | 1.15632099168154  | 1.65159426051506  | 3.02282722676736  |
| C  | -0.75896054051809 | 2.32553168828543  | -0.19821039993705 |
| C  | -0.16472215586471 | 1.45778699306276  | -1.11596611097788 |
| H  | -0.10031422100759 | 0.40149857048931  | -0.89229259015413 |
| C  | 0.32936470968744  | 1.99526529194349  | -2.28565148023165 |
| H  | 0.79915914797450  | 1.35332070155436  | -3.02135592897579 |
| C  | 0.22146600278181  | 3.36469544382333  | -2.50661553527065 |
| H  | 0.59910941916147  | 3.82390101362604  | -3.41035725040245 |
| C  | -0.38676173441248 | 4.13060363177809  | -1.53132684803881 |
| H  | -0.49436164994949 | 5.20324643080309  | -1.65867769362004 |
| C  | 1.23410032741234  | 2.93668532015888  | 3.34155918415201  |
| C  | 2.37257163197703  | 3.51071464682446  | 3.91023461826396  |
| H  | 2.39047403509921  | 4.56532333768465  | 4.15278876068755  |
| C  | 3.46357496315487  | 2.69895233069929  | 4.15035533887569  |
| H  | 4.36298102143558  | 3.11354290278660  | 4.58994391540476  |
| C  | 3.39084240110697  | 1.35082977679782  | 3.82366668649280  |
| H  | 4.22273950049502  | 0.68074898256464  | 3.99576084795800  |
| C  | 2.21554345325861  | 0.88162882168266  | 3.26543661943011  |
| H  | 2.11200571098397  | -0.16462186852797 | 2.99493339967251  |
| C  | -2.06696663277715 | 1.29694859937952  | 3.54984839461606  |
| H  | -2.89818747182721 | 0.69244797599648  | 3.17795038463778  |
| H  | -2.36588121767368 | 1.74334792694621  | 4.50025125672586  |
| H  | -1.20503944149786 | 0.65340572337711  | 3.71536274649400  |
| C  | -3.12936945770491 | 3.75427983323355  | 2.05337177750399  |
| H  | -2.86749036659872 | 4.60220265144557  | 1.42163832138665  |
| H  | -3.50311807593317 | 4.12324738429968  | 3.01124509600177  |
| H  | -3.93258744757438 | 3.19513037172515  | 1.56681772115601  |

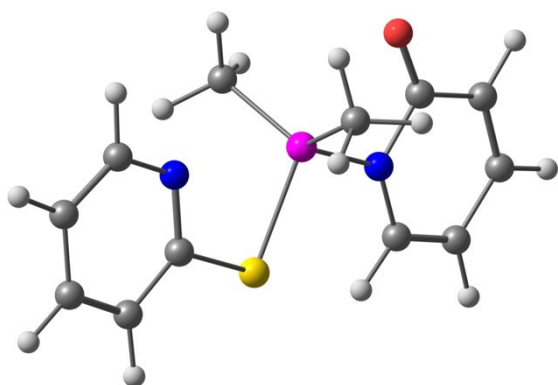

**Figure S49.** Optimized molecular structure of **2c'NS**.

PBE0:

final single point energy: -1340.7149414208 a.u.

final Gibbs free energy: -1340.51808668 a.u.

B2T-PLYP:

final single point energy: -1340.80593360056 a.u.

**Table S31.** Atomic coordinates for optimized structure of **2c'NS**.

|    |                   |                   |                   |
|----|-------------------|-------------------|-------------------|
| Si | 9.54344977433427  | 11.54816491164375 | 8.57419931853674  |
| S  | 8.90640359655701  | 10.09538472525058 | 7.06107501210195  |
| O  | 11.26808553883559 | 13.05532750545648 | 9.79245212013013  |
| N  | 6.88870260914256  | 10.78092404203572 | 8.61318319360310  |
| N  | 11.28901429628087 | 11.66430312087651 | 8.04177032394935  |
| C  | 7.22952907302290  | 10.02290469612178 | 7.57656882926774  |
| C  | 6.32248485715674  | 9.20076635113119  | 6.90798731628769  |
| H  | 6.64396515616575  | 8.59911482333917  | 6.06793865317487  |
| C  | 5.01455805787181  | 9.18308750264714  | 7.35061919398779  |
| H  | 4.28287094296862  | 8.55676575083361  | 6.85424190635609  |
| C  | 4.64932576693640  | 9.97445853083453  | 8.43329073847624  |
| H  | 3.63410476017157  | 9.98726336443161  | 8.80687013730811  |
| C  | 5.62448254502699  | 10.75316514863605 | 9.02916885693266  |
| H  | 5.38896631061645  | 11.38662880208103 | 9.87816715085965  |
| C  | 11.94522070229975 | 12.54585476135656 | 8.88557014565911  |
| C  | 13.33034204152482 | 12.77964662658021 | 8.62509375158869  |
| H  | 13.85274245028288 | 13.46481689569893 | 9.27909353935404  |
| C  | 13.94870566708023 | 12.15459290194242 | 7.58539559089747  |
| H  | 14.99979386227695 | 12.33979123849670 | 7.39448967628065  |
| C  | 13.23661776609331 | 11.26759744913399 | 6.74981968816833  |
| H  | 13.71262991225695 | 10.76566116576973 | 5.92016089500434  |
| C  | 11.91981694156348 | 11.05227281658849 | 7.01084970541087  |
| H  | 11.32374210693304 | 10.38428458302556 | 6.40323237761435  |
| C  | 8.74278080512934  | 13.19048544714106 | 8.23862345245955  |
| H  | 8.34898226136712  | 13.60527612818275 | 9.16698877637739  |
| H  | 7.92420099334592  | 13.07984591463213 | 7.52874626080823  |
| H  | 9.47984507406511  | 13.88649087430999 | 7.83652446582353  |
| C  | 9.49483238494116  | 10.75078212439048 | 10.25153813796106 |
| H  | 9.06505334510584  | 11.44479934427331 | 10.97447025162510 |
| H  | 10.50708870901109 | 10.50358991513342 | 10.57364548610412 |
| H  | 8.89112835563495  | 9.84454603502463  | 10.23062707589075 |

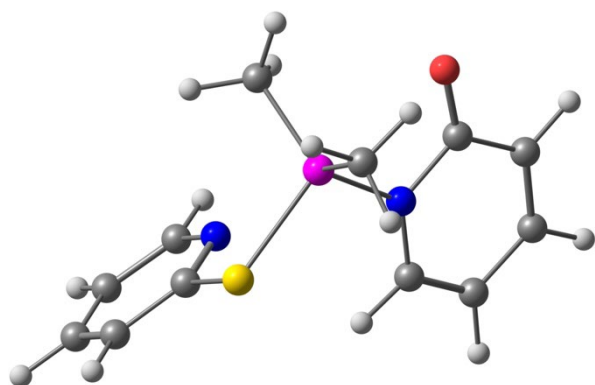

**Figure S50.** Optimized molecular structure of **2c<sup>SC</sup>**.

PBE0:

final single point energy: -1340.71745156175 a.u.

final Gibbs free energy: -1340.52065924 a.u.

B2T-PLYP:

final single point energy: -1340.80853232971 a.u.

**Table S32.** Atomic coordinates for optimized structure of **2c<sup>SC</sup>**.

|    |                   |                   |                   |
|----|-------------------|-------------------|-------------------|
| Si | -1.03900587077222 | 1.21346600888744  | 2.44059102948141  |
| S  | -0.80625553199348 | -0.24993105651197 | 0.85174672411791  |
| O  | -0.49879036356705 | 2.90782679718423  | 4.41536097412010  |
| N  | 0.22454622994826  | 1.96224202616429  | -0.20958310476244 |
| N  | 0.64104982557857  | 1.63044430332933  | 2.96674712844980  |
| C  | -0.21741624664366 | 0.74125727289986  | -0.48396834293854 |
| C  | -0.21856315598338 | 0.20575679636309  | -1.77233961326960 |
| H  | -0.59218115272208 | -0.79424873309428 | -1.94993683613019 |
| C  | 0.26495085277586  | 0.98755478083067  | -2.80344405005025 |
| H  | 0.27999097649481  | 0.60255430777011  | -3.81613659556881 |
| C  | 0.72394538159273  | 2.26903570172526  | -2.52702383327965 |
| H  | 1.10706821313164  | 2.91304722616394  | -3.30746546188170 |
| C  | 0.67825454303700  | 2.70695677839153  | -1.21578155563421 |
| H  | 1.02434340300117  | 3.70120322915985  | -0.95148541389443 |
| C  | 0.61466906370602  | 2.54644982911992  | 4.00811788495662  |
| C  | 1.88286870849643  | 2.98092837649694  | 4.50575524548458  |
| H  | 1.87979551949546  | 3.70060838341485  | 5.31332939623423  |
| C  | 3.03644591827313  | 2.49173441723498  | 3.97391966827816  |
| H  | 3.99157384517182  | 2.82714668283650  | 4.36246291984062  |
| C  | 3.00693044646776  | 1.55026558288768  | 2.92189852868787  |
| H  | 3.91476521503578  | 1.15213326152201  | 2.49293214960164  |
| C  | 1.79741818584857  | 1.15119818423458  | 2.44880599909826  |
| H  | 1.69159625655796  | 0.43550463451648  | 1.64491616940390  |
| C  | -1.85031104181023 | 0.16232590392947  | 3.73764731143835  |
| H  | -2.84544526448887 | -0.13473017021352 | 3.39916600060269  |
| H  | -1.94746296936556 | 0.72489809855269  | 4.66540753359560  |
| H  | -1.27019728735150 | -0.74228856594441 | 3.92961950895525  |
| C  | -2.01008368073779 | 2.68085810714631  | 1.85616164473959  |
| H  | -1.35477244579542 | 3.53669153061874  | 1.70326384872669  |
| H  | -2.75023528392934 | 2.93827511730854  | 2.61468808014575  |
| H  | -2.51633254545241 | 2.45489530307469  | 0.91696187145067  |

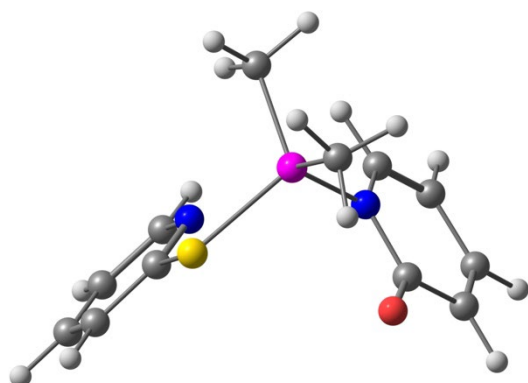

**Figure S51.** Optimized molecular structure of **2c<sup>CC</sup>**.

PBE0:

final single point energy: -1340.71405391523 a.u.

final Gibbs free energy: -1340.51695493 a.u.

B2T-PLYP:

final single point energy: -1340.80536507018 a.u.

**Table S33.** Atomic coordinates for optimized structure of **2c<sup>CC</sup>**.

|    |                   |                   |                  |
|----|-------------------|-------------------|------------------|
| Si | -1.49569823605878 | 1.65565261088814  | 1.98436848356215 |
| S  | -0.59027740120447 | -0.21034472497056 | 1.40810270246980 |
| O  | -2.54530037309505 | 0.12612450323995  | 4.16324854896820 |
| N  | 1.45245388440859  | 1.14492371741160  | 2.47044134292845 |
| N  | -1.27352205923343 | 1.95752424754596  | 3.74635896745056 |
| C  | 1.07645851041448  | -0.01664970979193 | 1.95272735192846 |
| C  | 1.93615031711552  | -1.10964092070436 | 1.83379876288421 |
| H  | 1.58221106625135  | -2.04094238475604 | 1.41102863509241 |
| C  | 3.23620479658495  | -0.96736402324056 | 2.27655545808258 |
| H  | 3.92895521515725  | -1.79698476635769 | 2.20062351378595 |
| C  | 3.63932702219020  | 0.24477591941965  | 2.82295154813335 |
| H  | 4.64781280071313  | 0.39443415982502  | 3.18490743326631 |
| C  | 2.70806446453503  | 1.26437564245687  | 2.89736383293590 |
| H  | 2.97470960647488  | 2.22773404206911  | 3.32103041229715 |
| C  | -1.88169838245298 | 1.05593968492910  | 4.62312650506780 |
| C  | -1.66815423721853 | 1.29866270583420  | 6.02244523512109 |
| H  | -2.14100101310079 | 0.61103164411016  | 6.71085315384815 |
| C  | -0.90068144906473 | 2.33417580494758  | 6.44910634648753 |
| H  | -0.74935273859068 | 2.49270305766663  | 7.51106753190857 |
| C  | -0.29220638140172 | 3.20746177564771  | 5.51809594298707 |
| H  | 0.32590549949296  | 4.03462242334014  | 5.83532978339782 |
| C  | -0.49788141486670 | 2.98158078847775  | 4.19749273720670 |
| H  | -0.04955232941391 | 3.60477155308545  | 3.43749389598633 |
| C  | -3.28651425578110 | 1.47842192039397  | 1.53703321121727 |
| H  | -3.39660191091849 | 1.56625887016854  | 0.45367713567106 |
| H  | -3.85677430189513 | 2.28684919169821  | 2.00159059326215 |
| H  | -3.69834329682236 | 0.52906694817218  | 1.87097286986996 |
| C  | -0.77208083177688 | 3.10457169367750  | 1.07507292687826 |
| H  | 0.29864501665762  | 3.21336166311556  | 1.23629874262620 |
| H  | -1.27989392600690 | 4.03004881986836  | 1.35883705939082 |
| H  | -0.94617914809332 | 2.94042303583167  | 0.00915308528743 |

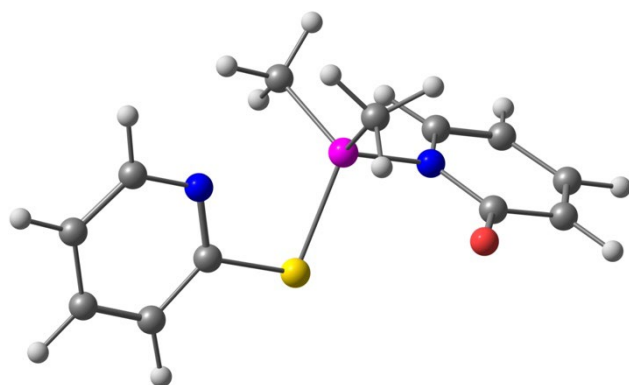

**Figure S52.** Optimized molecular structure of **2c'NC**.

PBE0:

final single point energy: -1340.71327924328 a.u.

final Gibbs free energy: -1340.51621768 a.u.

B2T-PLYP:

final single point energy: -1340.80479595093 a.u.

**Table S34.** Atomic coordinates for optimized structure of **2c'NC**.

|    |                   |                  |                   |
|----|-------------------|------------------|-------------------|
| Si | -1.01305737904486 | 3.01397626959379 | 2.83688800574957  |
| S  | -0.48107533075571 | 5.10022260729568 | 2.60849866675370  |
| O  | -3.18532770092051 | 4.19997866929820 | 4.21667607977276  |
| N  | 1.64757146038759  | 3.77804726141564 | 3.44460127324306  |
| N  | -2.74783900075666 | 3.09155918213666 | 2.29235465542112  |
| C  | 1.21942602504606  | 4.96469146092412 | 3.02868939995446  |
| C  | 2.05291919040886  | 6.07901794808116 | 2.92879025314377  |
| H  | 1.66057752787230  | 7.02812758841169 | 2.58782320545297  |
| C  | 3.38141097315726  | 5.92928371678722 | 3.27450662849854  |
| H  | 4.05709477597617  | 6.77364928032522 | 3.20753768838972  |
| C  | 3.83927548785829  | 4.68996141171193 | 3.70577444298620  |
| H  | 4.87323195433661  | 4.53479271210100 | 3.98349185248563  |
| C  | 2.93127644369703  | 3.64918864843979 | 3.77313450296329  |
| H  | 3.24015919819448  | 2.66334611896571 | 4.10604943405403  |
| C  | -3.63113542398217 | 3.71615411669273 | 3.17441968841359  |
| C  | -5.01059429367803 | 3.74189877184117 | 2.77869758887626  |
| H  | -5.70431879469600 | 4.20956246791071 | 3.46452882515939  |
| C  | -5.41160523441770 | 3.21536211454330 | 1.59272428869917  |
| H  | -6.45784462523748 | 3.25356825570777 | 1.31049439289397  |
| C  | -4.47325970933537 | 2.61850378523468 | 0.72048580178842  |
| H  | -4.76839287670166 | 2.19786838985039 | -0.22974028192042 |
| C  | -3.17307321105447 | 2.57839295749485 | 1.10567890034238  |
| H  | -2.41343192001021 | 2.13093412189578 | 0.48085949697098  |
| C  | -0.93154950502517 | 2.28272964064681 | 4.53791860652967  |
| H  | -0.04731003419141 | 1.64956813261356 | 4.61573433483726  |
| H  | -1.82477468697461 | 1.68138463828184 | 4.72028708133152  |
| H  | -0.88543665494005 | 3.06136033735827 | 5.29658453214256  |
| C  | -0.17440487599379 | 1.94756399668418 | 1.56439614875966  |
| H  | -0.18861022226190 | 2.38947668757875 | 0.56735225278692  |
| H  | -0.65414991105375 | 0.96579738470827 | 1.52298051815511  |
| H  | 0.86358599809692  | 1.80918324546885 | 1.86313524636455  |

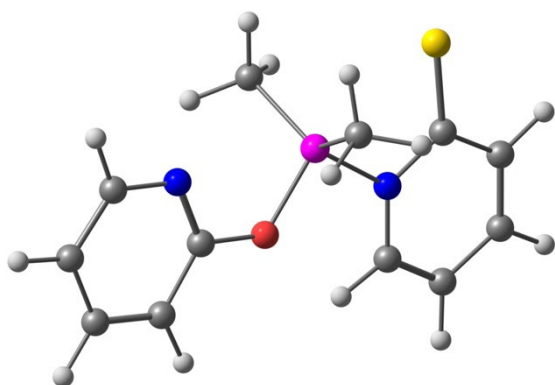

**Figure S53.** Optimized molecular structure of **2c''NO**.

PBE0:

final single point energy: -1340.72761155381 a.u.

final Gibbs free energy: -1340.52895022 a.u.

B2T-PLYP:

final single point energy: -1340.82125903126 a.u.

**Table S35.** Atomic coordinates for optimized structure of **2c''NO**.

|    |                   |                   |                   |
|----|-------------------|-------------------|-------------------|
| Si | 9.46400681686763  | 11.80371266047544 | 8.90829885493087  |
| O  | 8.79341908411183  | 10.68013291215710 | 7.80927950165954  |
| S  | 11.52116308331665 | 13.40552558598649 | 10.09220778305425 |
| N  | 6.76000109738731  | 10.90116529195832 | 8.80308639224172  |
| N  | 11.13614458297558 | 11.69921075078219 | 8.15450129737659  |
| C  | 7.50424753677465  | 10.34139181899195 | 7.86119460748952  |
| C  | 7.00255487445406  | 9.42542270283829  | 6.93393959402365  |
| H  | 7.65863044008067  | 9.00122588997107  | 6.18567312804301  |
| C  | 5.66634166302286  | 9.09502857776606  | 7.01256977724840  |
| H  | 5.24083868896521  | 8.38842181319466  | 6.30983175439409  |
| C  | 4.87316825589802  | 9.67513503676510  | 7.99843723345532  |
| H  | 3.82150976604437  | 9.43910693254780  | 8.08989221948162  |
| C  | 5.46936600972930  | 10.56977708688106 | 8.86495496169115  |
| H  | 4.89275813107311  | 11.04902911962062 | 9.64973460077017  |
| C  | 12.05647345569627 | 12.50137488380094 | 8.77231967332851  |
| C  | 13.37101055526645 | 12.51046190393630 | 8.25817971711832  |
| H  | 14.09973968940565 | 13.14353971641182 | 8.74489311994763  |
| C  | 13.69793314869394 | 11.73907214958219 | 7.17743262966574  |
| H  | 14.70953217394090 | 11.75331357514005 | 6.78909662288769  |
| C  | 12.72464629178516 | 10.92991749035624 | 6.56955700931909  |
| H  | 12.95368988185668 | 10.31121616488501 | 5.71393403665842  |
| C  | 11.46251516729518 | 10.93669880612617 | 7.08420989253753  |
| H  | 10.65962893609791 | 10.34387131487191 | 6.67298603136233  |
| C  | 8.67755379280700  | 13.43875821243406 | 8.52388373595140  |
| H  | 8.35664553399581  | 13.93116648895625 | 9.44179010539428  |
| H  | 7.80891886096829  | 13.29025529805685 | 7.88062538324681  |
| H  | 9.39125503550707  | 14.09485328753739 | 8.02461020886053  |
| C  | 9.41620128997403  | 10.98841443745243 | 10.57360953665089 |
| H  | 9.04449245915558  | 11.68650374275571 | 11.32368454702172 |
| H  | 10.41669850252742 | 10.67634047213153 | 10.87460061954446 |
| H  | 8.75838185832491  | 10.11854937262839 | 10.54338745264441 |

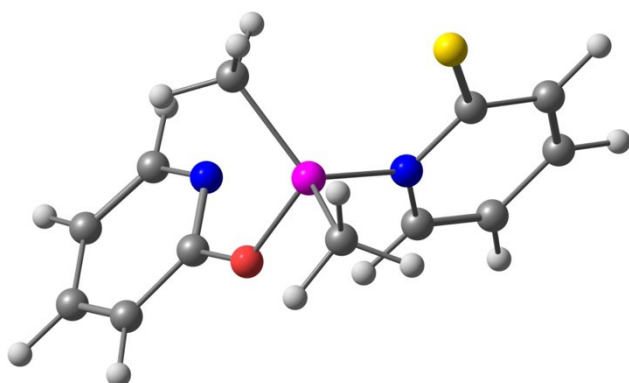

**Figure S54.** Optimized molecular structure of **2c''OC**.

PBE0:

final single point energy: -1340.72704167786 a.u.

final Gibbs free energy: -1340.52825279 a.u.

B2T-PLYP:

final single point energy: -1340.82063906332 a.u.

**Table S36.** Atomic coordinates for optimized structure of **2c''OC**.

|    |                   |                   |                   |
|----|-------------------|-------------------|-------------------|
| Si | -1.00048654478701 | 1.38341460354550  | 2.35014674422960  |
| O  | -0.60551047963404 | 0.50437297106082  | 0.94664344604980  |
| S  | -0.79165122683669 | 2.85118393118183  | 4.79067610930509  |
| N  | 0.28985750903092  | 2.24808816202727  | -0.22775468339860 |
| N  | 0.69142827227379  | 1.73444579140810  | 2.96865928680239  |
| C  | -0.20893344978038 | 1.02223349693287  | -0.22188051175898 |
| C  | -0.32264807610111 | 0.23742551071627  | -1.37132996780796 |
| H  | -0.73939412495362 | -0.75846353134084 | -1.30252968746031 |
| C  | 0.10668421856566  | 0.77437770000105  | -2.56646224220984 |
| H  | 0.03340702381571  | 0.19450315363079  | -3.47888128022511 |
| C  | 0.62971016843892  | 2.06384679983401  | -2.58776451195822 |
| H  | 0.97584954174790  | 2.51933055603737  | -3.50584732416059 |
| C  | 0.69603981029773  | 2.75401596933824  | -1.39346386390489 |
| H  | 1.09580162075662  | 3.76259136480380  | -1.35906409190466 |
| C  | 0.70839696000119  | 2.44795892281014  | 4.13424965996635  |
| C  | 1.96429073758372  | 2.77058747299002  | 4.69003260503861  |
| H  | 1.98189224911980  | 3.34855084418719  | 5.60344306704104  |
| C  | 3.11567043748098  | 2.34641929416485  | 4.08581070776012  |
| H  | 4.07652143128215  | 2.59320690820267  | 4.52189331440616  |
| C  | 3.05580767134916  | 1.58611024826962  | 2.90684103718683  |
| H  | 3.94873702363183  | 1.22773890882751  | 2.41567180241041  |
| C  | 1.83033003545623  | 1.30460399261493  | 2.38053460702693  |
| H  | 1.70907191163160  | 0.72425628767140  | 1.47920209305193  |
| C  | -1.81002556310847 | 0.05230562849913  | 3.35502890278111  |
| H  | -2.13139303648912 | -0.75915016809944 | 2.69885299510877  |
| H  | -2.67315990383257 | 0.44830813880487  | 3.88853747331721  |
| H  | -1.11737262008229 | -0.35102529391614 | 4.09551153247750  |
| C  | -2.01003615305128 | 2.83608013575535  | 1.79228241583538  |
| H  | -1.42873630375510 | 3.75685959592978  | 1.81333425006908  |
| H  | -2.86400643270856 | 2.95699686643201  | 2.45854138186932  |
| H  | -2.36298296334368 | 2.67288585367891  | 0.77141954305545  |



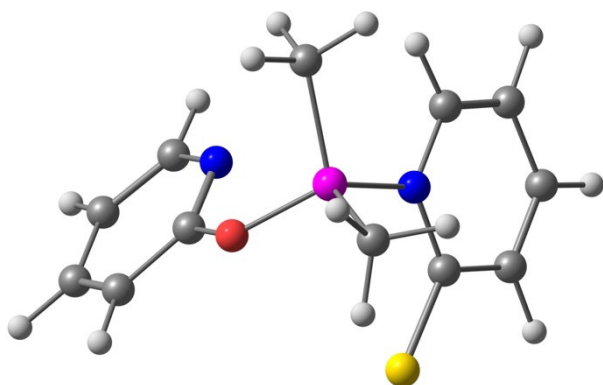

**Figure S55.** Optimized molecular structure of **2c''CC**.

PBE0:

final single point energy: -1340.72178856295 a.u.

final Gibbs free energy: -1340.52291949 a.u.

B2T-PLYP:

final single point energy: -1340.81671688475 a.u.

**Table S37.** Atomic coordinates for optimized structure of **2c''CC**.

|    |                   |                   |                  |
|----|-------------------|-------------------|------------------|
| Si | -1.29451567000339 | 1.65210922871861  | 1.99912315048144 |
| O  | -0.27133666845681 | 0.42127158774118  | 1.54972487422115 |
| S  | -1.91014056970020 | -0.53840677482651 | 4.19352535949101 |
| N  | 1.57870065863044  | 1.23848484375341  | 2.60674401726506 |
| N  | -1.17876875378471 | 1.99133368012386  | 3.78769624026787 |
| C  | 0.99086133509045  | 0.24460241573574  | 1.96417246917548 |
| C  | 1.61128552202916  | -0.97552056691746 | 1.69736015084896 |
| H  | 1.06972772046571  | -1.75181509187381 | 1.17430329607422 |
| C  | 2.90930755279320  | -1.14401618622794 | 2.13094599096448 |
| H  | 3.42541397763601  | -2.07869364900197 | 1.94651547897741 |
| C  | 3.54308214327162  | -0.10834763099994 | 2.81087175478130 |
| H  | 4.55920659940106  | -0.20536439158835 | 3.16900139655550 |
| C  | 2.83319191362728  | 1.05680193433012  | 3.02309587350898 |
| H  | 3.28387467496130  | 1.89132438962999  | 3.55077183604353 |
| C  | -1.47313489653408 | 1.00272765720097  | 4.70141770752431 |
| C  | -1.37648598614460 | 1.35074627477673  | 6.07359697629894 |
| H  | -1.61554387802753 | 0.57955978648164  | 6.79227349308685 |
| C  | -0.99025506197531 | 2.59645411738807  | 6.46987593792220 |
| H  | -0.92015189038169 | 2.83301211379036  | 7.52500044348652 |
| C  | -0.67935153342313 | 3.57062530945420  | 5.50436163977857 |
| H  | -0.36288827766549 | 4.56699689507582  | 5.77676094786088 |
| C  | -0.78452344744389 | 3.22821463141114  | 4.19420296880260 |
| H  | -0.55274983369915 | 3.93150611948165  | 3.40927080419604 |
| C  | -3.00701670631418 | 1.19476727875673  | 1.48270093792472 |
| H  | -3.13654758503929 | 1.44735558335601  | 0.42715062009268 |
| H  | -3.73525484857157 | 1.77063986247456  | 2.05871614946943 |
| H  | -3.21005058629518 | 0.13759491601383  | 1.63195627580229 |
| C  | -0.77820892402161 | 3.20582764795415  | 1.12769461633480 |
| H  | 0.23521200843203  | 3.51948502805789  | 1.37692660494169 |
| H  | -1.46947548326212 | 4.03199863531147  | 1.30779801848850 |
| H  | -0.80827899259432 | 2.98229424841779  | 0.05759771933240 |

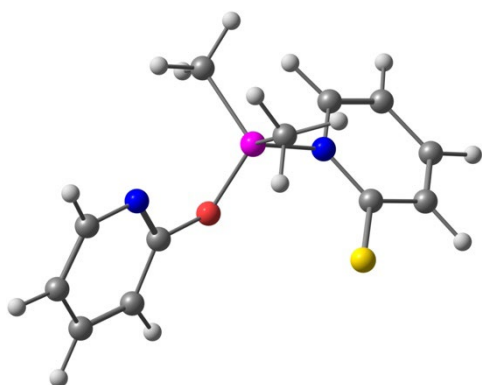

**Figure S56.** Optimized molecular structure of **2c''NC**.

PBE0:

final single point energy: -1340.72085275713 a.u.

final Gibbs free energy: -1340.5222748 a.u.

B2T-PLYP:

final single point energy: -1340.8158785842 a.u.

**Table S38.** Atomic coordinates for optimized structure of **2c''NC**.

|    |                   |                  |                   |
|----|-------------------|------------------|-------------------|
| Si | -0.87841903778852 | 2.76127009773598 | 2.80963659871287  |
| O  | -0.13238253899478 | 4.21448133545557 | 2.45215436046184  |
| S  | -2.68575493973867 | 4.84424127626413 | 4.29495827900146  |
| N  | 1.78937430159614  | 3.56212997936716 | 3.47626625653880  |
| N  | -2.58569749714905 | 3.11756295733931 | 2.26923870300675  |
| C  | 1.08349413493493  | 4.52925223657492 | 2.91405050122133  |
| C  | 1.54017578892408  | 5.84002842504127 | 2.78084183843109  |
| H  | 0.90948666709820  | 6.58634453502588 | 2.31748646306884  |
| C  | 2.79844866691143  | 6.13124126248607 | 3.26481438324926  |
| H  | 3.19028812084003  | 7.13807754735082 | 3.18291179350398  |
| C  | 3.55311338828892  | 5.12608873444539 | 3.86247695292319  |
| H  | 4.54181067139583  | 5.32006054900348 | 4.25609384936155  |
| C  | 3.00209785346025  | 3.86237234493450 | 3.94365194847396  |
| H  | 3.55098083874453  | 3.04629583320771 | 4.40240678072344  |
| C  | -3.33653975077812 | 4.03511034096069 | 2.97439596375812  |
| C  | -4.66652589375127 | 4.25118742106089 | 2.52962245400066  |
| H  | -5.25730731178979 | 4.96878264465073 | 3.08147972067416  |
| C  | -5.17755318513888 | 3.58604505042920 | 1.45499335278624  |
| H  | -6.19684804189359 | 3.77108745787390 | 1.13719098322484  |
| C  | -4.37725722647924 | 2.66136845405702 | 0.76049487412302  |
| H  | -4.74478229883275 | 2.11614837295445 | -0.09669091274637 |
| C  | -3.10551195837992 | 2.46254959909266 | 1.19596835321687  |
| H  | -2.44398203634812 | 1.76659696846613 | 0.70275367170749  |
| C  | -0.84442088365833 | 2.13166018038276 | 4.54814685535364  |
| H  | -0.17458880880090 | 1.27050548259941 | 4.60076452184493  |
| H  | -1.84649214133296 | 1.82463095217568 | 4.85393596149869  |
| H  | -0.50029431793543 | 2.89511014059610 | 5.24169426321570  |
| C  | -0.22648319676996 | 1.48171410416796 | 1.63538002438241  |
| H  | -0.22408898573608 | 1.81428183554159 | 0.59601648366749  |
| H  | -0.77283835202149 | 0.53868052276805 | 1.70855704045474  |
| H  | 0.80783561512361  | 1.29024527799033 | 1.92966119115880  |

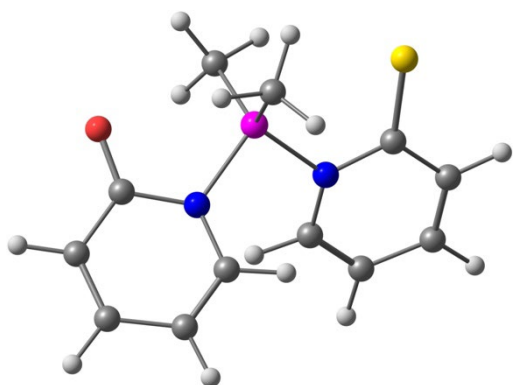

**Figure S57.** Optimized molecular structure of **2c'''NN**.

PBE0:

final single point energy: -1340.70537980238 a.u.

final Gibbs free energy: -1340.50697315 a.u.

B2T-PLYP:

final single point energy: -1340.7958833235 a.u.

**Table S39.** Atomic coordinates for optimized structure of **2c'''NN**.

|    |                   |                   |                   |
|----|-------------------|-------------------|-------------------|
| Si | 9.66296971365667  | 11.47247816417032 | 8.50524055167029  |
| O  | 7.51383660217403  | 9.93147846212268  | 9.56179612743024  |
| S  | 12.47943992720650 | 12.41868698212381 | 8.14155159505477  |
| N  | 7.93588088157426  | 11.40560155367669 | 7.89624419790889  |
| N  | 9.98052131034076  | 13.23180881283817 | 8.05188704737762  |
| C  | 7.07965493165298  | 10.55307255067228 | 8.58930494671266  |
| C  | 5.73819885236467  | 10.45659658009524 | 8.08449604228436  |
| H  | 5.04413529192674  | 9.85808962259609  | 8.65937387262601  |
| C  | 5.38742961210833  | 11.04038415721386 | 6.90983057213311  |
| H  | 4.37891280013228  | 10.92668162654311 | 6.52845183163282  |
| C  | 6.33645957860990  | 11.78243235617678 | 6.16930381141215  |
| H  | 6.09372326868698  | 12.22370199797493 | 5.21367978902660  |
| C  | 7.57821598239221  | 11.93451680906719 | 6.69238719238435  |
| H  | 8.34351222337274  | 12.49299950544275 | 6.16854389027664  |
| C  | 11.29673538999954 | 13.58822891409177 | 7.89657873449331  |
| C  | 11.57297583600483 | 14.94151864643776 | 7.58638372534712  |
| H  | 12.60475203590068 | 15.21145485031660 | 7.40973200131817  |
| C  | 10.57599543911799 | 15.87306740325810 | 7.56072183264313  |
| H  | 10.80690487212224 | 16.90932083127263 | 7.34425802624867  |
| C  | 9.25321508694139  | 15.48929566689158 | 7.84304774558813  |
| H  | 8.44482816387297  | 16.20538912809217 | 7.87261424446312  |
| C  | 9.00052281561209  | 14.17387242719354 | 8.07767131320702  |
| H  | 8.00424137450271  | 13.82095425171978 | 8.30046708208990  |
| C  | 9.81023726365379  | 11.49173054885904 | 10.34500481106448 |
| H  | 9.87711671813198  | 10.47898722425873 | 10.73783264174007 |
| H  | 8.93455853426410  | 11.97189919039856 | 10.78432819610346 |
| H  | 10.70531504215175 | 12.05115761113223 | 10.62108165451993 |
| C  | 10.38729244530677 | 10.09437726770000 | 7.50319170065978  |
| H  | 11.31562747116339 | 9.72900473381075  | 7.93427892229138  |
| H  | 10.58755341062105 | 10.42455612795327 | 6.48216126312556  |
| H  | 9.64748009843295  | 9.28935057489868  | 7.46890037016569  |

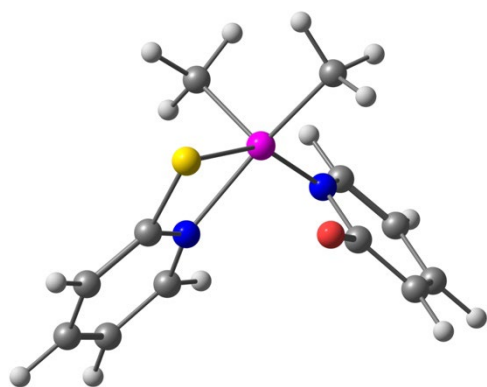

**Figure S58.** Optimized molecular structure of **2c'''OSiCtrans**.

PBE0:

final single point energy: -1340.71270724651 a.u.

final Gibbs free energy: -1340.51380467 a.u.

B2T-PLYP:

final single point energy: -1340.80019328328 a.u.

**Table S40.** Atomic coordinates for optimized structure of **2c'''OSiCtrans**.

|    |                   |                   |                   |
|----|-------------------|-------------------|-------------------|
| Si | 9.80173860902315  | 11.57865650154364 | 8.42484701823001  |
| O  | 9.37744267002106  | 11.26944316274191 | 6.47369596663783  |
| S  | 12.08769749304626 | 11.72394894771672 | 7.93706239541880  |
| N  | 8.04293219412635  | 10.85593735201525 | 8.11176674274255  |
| N  | 10.56942522390982 | 9.73961258888908  | 8.21059028128964  |
| C  | 8.20430876586424  | 10.85294537432982 | 6.77148514201680  |
| C  | 7.15600784903585  | 10.42620150611489 | 5.93956714277940  |
| H  | 7.28295422445058  | 10.41966795819800 | 4.86592377897963  |
| C  | 5.98900273775426  | 10.02822578519718 | 6.54783784522585  |
| H  | 5.16004162398555  | 9.69154902216589  | 5.93596005846617  |
| C  | 5.84694887004427  | 10.04732279681387 | 7.94425916775258  |
| H  | 4.92736733825922  | 9.73488255154348  | 8.41776403099344  |
| C  | 6.90847514003778  | 10.47401142991862 | 8.70269829366576  |
| H  | 6.88173994292530  | 10.51878616916210 | 9.78458669403214  |
| C  | 11.86384763096072 | 10.02189714456591 | 7.98257047403694  |
| C  | 12.79291114127779 | 8.99185547143932  | 7.82833008080091  |
| H  | 13.83263155611894 | 9.22434150989525  | 7.64421863484080  |
| C  | 12.34536932414311 | 7.69037308535440  | 7.91682444127415  |
| H  | 13.04623202034952 | 6.87255421556408  | 7.79830245031012  |
| C  | 10.99787370148913 | 7.42161388574100  | 8.16042225710531  |
| H  | 10.62942152606748 | 6.40817635603893  | 8.23477082150542  |
| C  | 10.13490631915291 | 8.48496002504799  | 8.30484529232233  |
| H  | 9.07699769828975  | 8.35198546143523  | 8.49549601988330  |
| C  | 9.41231707860152  | 13.42311249300998 | 8.23219087822929  |
| H  | 10.02519705071170 | 13.98358320386665 | 8.94379107818956  |
| H  | 8.36409295426496  | 13.63084834896664 | 8.46470187511139  |
| H  | 9.62410764248666  | 13.79412198587047 | 7.22933929898250  |
| C  | 9.81638003010658  | 11.40447926929324 | 10.31766146222455 |
| H  | 9.06833252631119  | 12.08027393474197 | 10.74314709571492 |
| H  | 10.78548992930244 | 11.68325033634629 | 10.73526297085672 |
| H  | 9.58497367688080  | 10.39029425747100 | 10.65133079038026 |

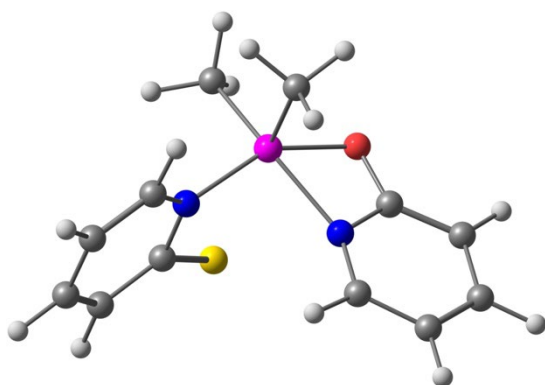

**Figure S59.** Optimized molecular structure of **2c'''SSiCtrans**.

PBE0:

final single point energy: -1340.71599711703 a.u.

final Gibbs free energy: -1340.51647176 a.u.

B2T-PLYP:

final single point energy: -1340.80420306491 a.u.

**Table S41.** Atomic coordinates for optimized structure of **2c'''SSiCtrans**.

|    |                   |                   |                   |
|----|-------------------|-------------------|-------------------|
| Si | 9.81915379953407  | 11.45686862978887 | 8.42660195634980  |
| S  | 9.49182158386666  | 11.17717771330595 | 5.81557990507035  |
| O  | 11.64499786326572 | 11.36086945596342 | 8.24533446376237  |
| N  | 8.07013416795097  | 10.89717450109855 | 7.92207680829199  |
| N  | 10.47141171166357 | 9.56706181564543  | 8.19236384545991  |
| C  | 8.01531776866593  | 10.81399040105631 | 6.56922146120132  |
| C  | 6.80060025433533  | 10.45220145183043 | 5.96259804692469  |
| H  | 6.75205990029269  | 10.38951975440422 | 4.88427263041489  |
| C  | 5.70752496252068  | 10.18464511507366 | 6.74923262198820  |
| H  | 4.76805944429685  | 9.90386748127429  | 6.28769731315071  |
| C  | 5.80114070047301  | 10.27129279156150 | 8.14378314820835  |
| H  | 4.95451709361817  | 10.06374034950093 | 8.78249564646996  |
| C  | 7.00445430054447  | 10.63296095864775 | 8.69141686950540  |
| H  | 7.15088584653039  | 10.72301873669943 | 9.75907221101116  |
| C  | 11.71319542799673 | 10.06051936951462 | 8.17022831358734  |
| C  | 12.82558916987383 | 9.22680615823411  | 8.07594599410488  |
| H  | 13.82542741154575 | 9.63693214830182  | 8.05990926707895  |
| C  | 12.57609317141405 | 7.87111138088043  | 8.00023294314356  |
| H  | 13.40879761044253 | 7.18235443875011  | 7.92046580461774  |
| C  | 11.27061583893533 | 7.37039929315748  | 8.02521880751950  |
| H  | 11.07758596156893 | 6.30878424555309  | 7.96409598820387  |
| C  | 10.22620493215903 | 8.26239888855845  | 8.12679952346870  |
| H  | 9.18738283676781  | 7.95473035201970  | 8.14805745306868  |
| C  | 9.66081344945868  | 13.31543403561916 | 8.14642099432883  |
| H  | 9.78532342382752  | 13.83946241051932 | 9.09901489396410  |
| H  | 8.68260510967002  | 13.57819102561921 | 7.74006764491813  |
| H  | 10.42152671031919 | 13.67383416444559 | 7.45374543901185  |
| C  | 9.64827184044608  | 11.27208770083227 | 10.30102411950285 |
| H  | 8.88548710760024  | 11.95607531035486 | 10.68338769487909 |
| H  | 10.59237366109789 | 11.55327092452008 | 10.77350757129456 |
| H  | 9.39779142831670  | 10.26213112826769 | 10.63138109949723 |
