# Supplementary material for: Molecular Structures of the Silicon Pyridine-2-(thi)olates Me3Si(pyX), Me2Si(pyX)2 and Ph2Si(pyX)2 (py = 2-Pyridyl, X = O, S), and Their Intra- and Intermolecular Ligand Exchange in Solution
Source: MDPI journal article supplement (doi:10.3390/cryst12081054), 2022-07-28
Supplement: s1 [file s1]

Archive with 3 entries (3 files):
- checkcif_all-in-one_SeidelWeigelEhrlichGerickeBrendlerWagler_pyOpyS-silanes.pdf
- CIFs_all-in-one_SeidelWeigelEhrlichGerickeBrendlerWagler_pyOpyS-silanes.cif
- SI_crystals-1817835_R1.pdf
