# Supplementary material for: Molecular Structures of the Silicon Pyridine-2-(thi)olates Me3Si(pyX), Me2Si(pyX)2 and Ph2Si(pyX)2 (py = 2-Pyridyl, X = O, S), and Their Intra- and Intermolecular Ligand Exchange in Solution
Source: MDPI journal article supplement (doi:10.3390/cryst12081054), 2022-07-28
Supplement: s1 [file s1 › CIFs_all-in-one_SeidelWeigelEhrlichGerickeBrendlerWagler_pyOpyS-silanes.cif]

 
data_pyosime3_02

# start Validation Reply Form
_vrf_CRYSS02_pyosime3_02
;
PROBLEM: The value of _exptl_crystal_size... 
RESPONSE: In this particular case, the crystal size is a result of the 
experimental setup, i.e., of crystal growth in a capillary on the 
diffractometer.
;

# end Validation Reply Form

 
_audit_creation_method            'SHELXL-2014/7'
_shelx_SHELXL_version_number      '2014/7'
_chemical_name_systematic         ?
_chemical_name_common             ?
_chemical_melting_point           ?
_chemical_formula_moiety          'C8 H13 N O Si' 
_chemical_formula_sum
 'C8 H13 N O Si' 
_chemical_formula_weight          167.28

loop_
 _atom_type_symbol
 _atom_type_description
 _atom_type_scat_dispersion_real
 _atom_type_scat_dispersion_imag
 _atom_type_scat_source
 'C'  'C'   0.0033   0.0016
 'International Tables Vol C Tables 4.2.6.8 and 6.1.1.4'
 'H'  'H'   0.0000   0.0000
 'International Tables Vol C Tables 4.2.6.8 and 6.1.1.4'
 'N'  'N'   0.0061   0.0033
 'International Tables Vol C Tables 4.2.6.8 and 6.1.1.4'
 'O'  'O'   0.0106   0.0060
 'International Tables Vol C Tables 4.2.6.8 and 6.1.1.4'
 'Si'  'Si'   0.0817   0.0704
 'International Tables Vol C Tables 4.2.6.8 and 6.1.1.4'
 
_space_group_crystal_system       orthorhombic
_space_group_IT_number            61
_space_group_name_H-M_alt         'P b c a'
_space_group_name_Hall            '-P 2ac 2ab'
 
_shelx_space_group_comment
;
The symmetry employed for this shelxl refinement is uniquely defined
by the following loop, which should always be used as a source of
symmetry information in preference to the above space-group names.
They are only intended as comments.
;
 
loop_
 _space_group_symop_operation_xyz
 'x, y, z'
 '-x+1/2, -y, z+1/2'
 'x+1/2, -y+1/2, -z'
 '-x, y+1/2, -z+1/2'
 '-x, -y, -z'
 'x-1/2, y, -z-1/2'
 '-x-1/2, y-1/2, z'
 'x, -y-1/2, z-1/2'
 
_cell_length_a                    11.6876(10)
_cell_length_b                    24.898(3)
_cell_length_c                    13.833(2)
_cell_angle_alpha                 90
_cell_angle_beta                  90
_cell_angle_gamma                 90
_cell_volume                      4025.4(9)
_cell_formula_units_Z             16
_cell_measurement_temperature     220(2)
_cell_measurement_reflns_used    33862
_cell_measurement_theta_min      2.28
_cell_measurement_theta_max      25.29
 
_exptl_crystal_description        column
_exptl_crystal_colour             colorless
_exptl_crystal_density_meas       ?
_exptl_crystal_density_method     ?
_exptl_crystal_density_diffrn     1.104          
_exptl_crystal_F_000              1440
_exptl_transmission_factor_min    ?
_exptl_transmission_factor_max    ?
_exptl_crystal_size_max           45
_exptl_crystal_size_mid           1.000
_exptl_crystal_size_min           1.000
_exptl_absorpt_coefficient_mu     0.184
_shelx_estimated_absorpt_T_min    0.044
_shelx_estimated_absorpt_T_max    0.838
_exptl_absorpt_correction_type   integration
_exptl_absorpt_correction_T_min  0.1204
_exptl_absorpt_correction_T_max  0.6159
_exptl_absorpt_process_details    XShape
_exptl_absorpt_special_details    ?
_diffrn_ambient_temperature       220(2)
_diffrn_radiation_wavelength      0.71073
_diffrn_radiation_type            MoK\a
_diffrn_source                    ?
_diffrn_measurement_device_type   'Stoe IPDS-2T'
_diffrn_measurement_method        'omega scans'
_diffrn_detector_area_resol_mean  ?
_diffrn_reflns_number             26377
_diffrn_reflns_av_unetI/netI      0.0204
_diffrn_reflns_av_R_equivalents   0.0463
_diffrn_reflns_limit_h_min        -13
_diffrn_reflns_limit_h_max        12
_diffrn_reflns_limit_k_min        -29
_diffrn_reflns_limit_k_max        29
_diffrn_reflns_limit_l_min        -16
_diffrn_reflns_limit_l_max        16
_diffrn_reflns_theta_min          2.424
_diffrn_reflns_theta_max          24.999
_diffrn_reflns_theta_full         24.999
_diffrn_measured_fraction_theta_max   0.994
_diffrn_measured_fraction_theta_full  0.994
_diffrn_reflns_Laue_measured_fraction_max    0.994
_diffrn_reflns_Laue_measured_fraction_full   0.994
_diffrn_reflns_point_group_measured_fraction_max   0.994
_diffrn_reflns_point_group_measured_fraction_full  0.994
_reflns_number_total              3522
_reflns_number_gt                 3045
_reflns_threshold_expression      'I > 2\s(I)'
_reflns_Friedel_coverage          0.000
_reflns_Friedel_fraction_max      .
_reflns_Friedel_fraction_full     .
 
_reflns_special_details
;
 Reflections were merged by SHELXL according to the crystal
 class for the calculation of statistics and refinement.
 
 _reflns_Friedel_fraction is defined as the number of unique
 Friedel pairs measured divided by the number that would be
 possible theoretically, ignoring centric projections and
 systematic absences.
;
 
_computing_data_collection       'STOE X-AREA'
_computing_cell_refinement       'STOE X-AREA'
_computing_data_reduction        'STOE X-RED'
_computing_structure_solution     'SHELXS97'
_computing_structure_refinement 'SHELXL-2014/7 (Sheldrick, 2014)'
_computing_molecular_graphics     ?
_computing_publication_material   ?
_refine_special_details           
;
 This compound is a liquid at room temperature. For crystallization
 it was transferred into a glass capillary (1 mm diameter) and
 sealed. On the diffractometer the sample was cooled to 140 K (it 
 formed a glass) and then warmed up to 210 K. During the latter 
 procedure the sample turned into a polycrystalline solid, which
 produced a powder diffraction pattern. Slow melting with retention
 of some of the crystalline material in the central and coldest part
 of the capillary (by heating the N2-flow up to 247 K) followed by
 slow cooling to 200 K (at a rate of 50 K per hour) caused the
 formation of larger crystalline domains in the parts of the
 capillary adjacent to the central polycrystalline spot. One of these
 parts of the capillary contained two twinned domains, but the
 diffraction pattern suffered very limited overlap only. Thus, the
 data set of the major domain was integrated as a single crystal
 data set. In addition to the absorption correction with a long
 needle model, to account for the absorption by this compound and
 the surrounding glass capillary container, scaling and outlier
 rejection was applied.
 In the final refinement only 17 reflections, which exhibited
 significant twin contributions, were omitted.
;
_refine_ls_structure_factor_coef  Fsqd
_refine_ls_matrix_type            full
_refine_ls_weighting_scheme       calc
_refine_ls_weighting_details
'w=1/[\s^2^(Fo^2^)+(0.0712P)^2^+0.6382P] where P=(Fo^2^+2Fc^2^)/3'
_atom_sites_solution_primary      ?
_atom_sites_solution_secondary    ?
_atom_sites_solution_hydrogens    geom
_refine_ls_hydrogen_treatment     constr
_refine_ls_extinction_method      none
_refine_ls_extinction_coef        .
_refine_ls_number_reflns          3522
_refine_ls_number_parameters      205
_refine_ls_number_restraints      0
_refine_ls_R_factor_all           0.0478
_refine_ls_R_factor_gt            0.0419
_refine_ls_wR_factor_ref          0.1205
_refine_ls_wR_factor_gt           0.1136
_refine_ls_goodness_of_fit_ref    1.074
_refine_ls_restrained_S_all       1.074
_refine_ls_shift/su_max           0.001
_refine_ls_shift/su_mean          0.000
 
loop_
 _atom_site_label
 _atom_site_type_symbol
 _atom_site_fract_x
 _atom_site_fract_y
 _atom_site_fract_z
 _atom_site_U_iso_or_equiv
 _atom_site_adp_type
 _atom_site_occupancy
 _atom_site_site_symmetry_order  
 _atom_site_calc_flag
 _atom_site_refinement_flags_posn
 _atom_site_refinement_flags_adp
 _atom_site_refinement_flags_occupancy
 _atom_site_disorder_assembly
 _atom_site_disorder_group
Si1 Si 0.14262(5) 0.46845(2) 0.68208(4) 0.06597(19) Uani 1 1 d . . . . .
O1 O 0.14419(10) 0.40235(5) 0.65753(10) 0.0635(3) Uani 1 1 d . . . . .
N1 N 0.32428(12) 0.38500(5) 0.71412(11) 0.0580(4) Uani 1 1 d . . . . .
C1 C 0.22679(13) 0.36663(6) 0.68047(11) 0.0498(4) Uani 1 1 d . . . . .
C2 C 0.20408(16) 0.31247(7) 0.66701(14) 0.0604(4) Uani 1 1 d . . . . .
H2 H 0.1330 0.3010 0.6427 0.072 Uiso 1 1 calc R U . . .
C3 C 0.28777(18) 0.27605(7) 0.69000(14) 0.0661(5) Uani 1 1 d . . . . .
H3 H 0.2749 0.2390 0.6822 0.079 Uiso 1 1 calc R U . . .
C4 C 0.39060(18) 0.29438(8) 0.72461(14) 0.0667(5) Uani 1 1 d . . . . .
H4 H 0.4498 0.2703 0.7403 0.080 Uiso 1 1 calc R U . . .
C5 C 0.40472(17) 0.34844(7) 0.73564(16) 0.0676(5) Uani 1 1 d . . . . .
H5 H 0.4751 0.3608 0.7598 0.081 Uiso 1 1 calc R U . . .
C6 C 0.2510(2) 0.50354(10) 0.6087(2) 0.1076(10) Uani 1 1 d . . . . .
H6A H 0.3268 0.4919 0.6282 0.161 Uiso 1 1 calc R U . . .
H6B H 0.2440 0.5420 0.6185 0.161 Uiso 1 1 calc R U . . .
H6C H 0.2393 0.4952 0.5410 0.161 Uiso 1 1 calc R U . . .
C7 C 0.1623(3) 0.47910(11) 0.81278(19) 0.1018(8) Uani 1 1 d . . . . .
H7A H 0.0971 0.4646 0.8474 0.153 Uiso 1 1 calc R U . . .
H7B H 0.1686 0.5173 0.8258 0.153 Uiso 1 1 calc R U . . .
H7C H 0.2315 0.4611 0.8339 0.153 Uiso 1 1 calc R U . . .
C8 C -0.0054(2) 0.48656(10) 0.6466(2) 0.1034(9) Uani 1 1 d . . . . .
H8A H -0.0163 0.4790 0.5785 0.155 Uiso 1 1 calc R U . . .
H8B H -0.0179 0.5245 0.6585 0.155 Uiso 1 1 calc R U . . .
H8C H -0.0593 0.4656 0.6844 0.155 Uiso 1 1 calc R U . . .
Si2 Si 0.55503(4) 0.34124(2) 0.44934(3) 0.05797(18) Uani 1 1 d . . . . .
O2 O 0.63011(10) 0.34272(6) 0.34560(9) 0.0657(4) Uani 1 1 d . . . . .
N2 N 0.47911(12) 0.35067(6) 0.23998(10) 0.0572(4) Uani 1 1 d . . . . .
C9 C 0.59088(15) 0.34993(6) 0.25435(12) 0.0525(4) Uani 1 1 d . . . . .
C10 C 0.67124(16) 0.35592(8) 0.18113(13) 0.0633(5) Uani 1 1 d . . . . .
H10 H 0.7500 0.3556 0.1947 0.076 Uiso 1 1 calc R U . . .
C11 C 0.63197(17) 0.36232(9) 0.08822(14) 0.0711(5) Uani 1 1 d . . . . .
H11 H 0.6838 0.3665 0.0368 0.085 Uiso 1 1 calc R U . . .
C12 C 0.51548(18) 0.36261(8) 0.07117(13) 0.0661(5) Uani 1 1 d . . . . .
H12 H 0.4865 0.3666 0.0082 0.079 Uiso 1 1 calc R U . . .
C13 C 0.44366(16) 0.35700(7) 0.14832(13) 0.0608(4) Uani 1 1 d . . . . .
H13 H 0.3645 0.3576 0.1366 0.073 Uiso 1 1 calc R U . . .
C14 C 0.6703(2) 0.33241(13) 0.53964(16) 0.0958(8) Uani 1 1 d . . . . .
H14A H 0.7121 0.2997 0.5258 0.144 Uiso 1 1 calc R U . . .
H14B H 0.6371 0.3301 0.6038 0.144 Uiso 1 1 calc R U . . .
H14C H 0.7221 0.3628 0.5367 0.144 Uiso 1 1 calc R U . . .
C15 C 0.4537(2) 0.28397(9) 0.45159(15) 0.0785(6) Uani 1 1 d . . . . .
H15A H 0.4021 0.2865 0.3969 0.118 Uiso 1 1 calc R U . . .
H15B H 0.4100 0.2848 0.5112 0.118 Uiso 1 1 calc R U . . .
H15C H 0.4961 0.2505 0.4479 0.118 Uiso 1 1 calc R U . . .
C16 C 0.47797(18) 0.40485(8) 0.46655(15) 0.0704(5) Uani 1 1 d . . . . .
H16A H 0.5313 0.4346 0.4615 0.106 Uiso 1 1 calc R U . . .
H16B H 0.4425 0.4052 0.5299 0.106 Uiso 1 1 calc R U . . .
H16C H 0.4194 0.4084 0.4173 0.106 Uiso 1 1 calc R U . . .
 
loop_
 _atom_site_aniso_label
 _atom_site_aniso_U_11
 _atom_site_aniso_U_22
 _atom_site_aniso_U_33
 _atom_site_aniso_U_23
 _atom_site_aniso_U_13
 _atom_site_aniso_U_12
Si1 0.0590(3) 0.0495(3) 0.0894(4) 0.0103(2) 0.0199(2) 0.0041(2)
O1 0.0545(7) 0.0549(7) 0.0811(8) 0.0001(6) -0.0034(6) 0.0040(5)
N1 0.0527(8) 0.0493(7) 0.0720(9) -0.0027(6) -0.0027(7) -0.0039(6)
C1 0.0512(9) 0.0488(8) 0.0495(8) 0.0008(6) 0.0065(6) -0.0010(7)
C2 0.0571(10) 0.0542(9) 0.0699(11) -0.0094(8) 0.0047(8) -0.0096(8)
C3 0.0794(13) 0.0437(9) 0.0753(12) -0.0009(8) 0.0100(10) -0.0030(8)
C4 0.0737(12) 0.0575(10) 0.0688(11) 0.0035(8) -0.0036(9) 0.0128(9)
C5 0.0596(10) 0.0618(10) 0.0815(13) -0.0038(9) -0.0134(9) 0.0017(8)
C6 0.0880(15) 0.0797(15) 0.155(3) 0.0420(16) 0.0490(17) 0.0063(12)
C7 0.108(2) 0.0929(17) 0.1043(19) -0.0296(14) 0.0219(15) 0.0146(15)
C8 0.0744(14) 0.0800(15) 0.156(3) 0.0377(16) 0.0137(15) 0.0206(12)
Si2 0.0571(3) 0.0715(3) 0.0453(3) 0.0051(2) 0.00542(19) 0.0145(2)
O2 0.0530(7) 0.0955(10) 0.0486(7) 0.0083(6) 0.0049(5) 0.0155(6)
N2 0.0518(8) 0.0635(8) 0.0564(8) 0.0077(6) 0.0021(6) -0.0009(6)
C9 0.0538(9) 0.0561(9) 0.0475(8) 0.0025(7) 0.0049(7) 0.0057(7)
C10 0.0547(10) 0.0827(12) 0.0526(10) 0.0018(8) 0.0080(7) 0.0039(9)
C11 0.0705(12) 0.0920(14) 0.0509(10) 0.0022(9) 0.0128(9) 0.0006(10)
C12 0.0791(12) 0.0709(11) 0.0482(9) 0.0003(8) -0.0065(8) -0.0030(10)
C13 0.0591(10) 0.0622(10) 0.0611(10) 0.0054(8) -0.0067(8) -0.0056(8)
C14 0.0845(15) 0.148(2) 0.0547(12) 0.0080(13) -0.0068(10) 0.0353(15)
C15 0.1034(17) 0.0684(12) 0.0637(12) 0.0044(9) 0.0169(11) 0.0022(11)
C16 0.0695(11) 0.0682(11) 0.0734(12) -0.0020(9) 0.0048(9) 0.0075(9)
 
_geom_special_details
;
 All esds (except the esd in the dihedral angle between two l.s. planes)
 are estimated using the full covariance matrix.  The cell esds are taken
 into account individually in the estimation of esds in distances, angles
 and torsion angles; correlations between esds in cell parameters are only
 used when they are defined by crystal symmetry.  An approximate (isotropic)
 treatment of cell esds is used for estimating esds involving l.s. planes.
;
 
loop_
 _geom_bond_atom_site_label_1
 _geom_bond_atom_site_label_2
 _geom_bond_distance
 _geom_bond_site_symmetry_2
 _geom_bond_publ_flag
Si1 O1 1.6805(13) . ?
Si1 C7 1.842(3) . ?
Si1 C6 1.843(2) . ?
Si1 C8 1.853(2) . ?
O1 C1 1.350(2) . ?
N1 C1 1.313(2) . ?
N1 C5 1.342(2) . ?
C1 C2 1.387(2) . ?
C2 C3 1.371(3) . ?
C2 H2 0.9400 . ?
C3 C4 1.372(3) . ?
C3 H3 0.9400 . ?
C4 C5 1.365(3) . ?
C4 H4 0.9400 . ?
C5 H5 0.9400 . ?
C6 H6A 0.9700 . ?
C6 H6B 0.9700 . ?
C6 H6C 0.9700 . ?
C7 H7A 0.9700 . ?
C7 H7B 0.9700 . ?
C7 H7C 0.9700 . ?
C8 H8A 0.9700 . ?
C8 H8B 0.9700 . ?
C8 H8C 0.9700 . ?
Si2 O2 1.6825(13) . ?
Si2 C16 1.837(2) . ?
Si2 C14 1.850(2) . ?
Si2 C15 1.854(2) . ?
O2 C9 1.355(2) . ?
N2 C9 1.321(2) . ?
N2 C13 1.343(2) . ?
C9 C10 1.389(2) . ?
C10 C11 1.374(3) . ?
C10 H10 0.9400 . ?
C11 C12 1.382(3) . ?
C11 H11 0.9400 . ?
C12 C13 1.365(3) . ?
C12 H12 0.9400 . ?
C13 H13 0.9400 . ?
C14 H14A 0.9700 . ?
C14 H14B 0.9700 . ?
C14 H14C 0.9700 . ?
C15 H15A 0.9700 . ?
C15 H15B 0.9700 . ?
C15 H15C 0.9700 . ?
C16 H16A 0.9700 . ?
C16 H16B 0.9700 . ?
C16 H16C 0.9700 . ?
 
loop_
 _geom_angle_atom_site_label_1
 _geom_angle_atom_site_label_2
 _geom_angle_atom_site_label_3
 _geom_angle
 _geom_angle_site_symmetry_1
 _geom_angle_site_symmetry_3
 _geom_angle_publ_flag
O1 Si1 C7 109.76(10) . . ?
O1 Si1 C6 110.20(11) . . ?
C7 Si1 C6 112.73(16) . . ?
O1 Si1 C8 101.24(10) . . ?
C7 Si1 C8 109.95(13) . . ?
C6 Si1 C8 112.36(13) . . ?
C1 O1 Si1 127.25(11) . . ?
C1 N1 C5 116.77(15) . . ?
N1 C1 O1 118.31(14) . . ?
N1 C1 C2 123.53(16) . . ?
O1 C1 C2 118.16(15) . . ?
C3 C2 C1 118.38(17) . . ?
C3 C2 H2 120.8 . . ?
C1 C2 H2 120.8 . . ?
C2 C3 C4 119.08(16) . . ?
C2 C3 H3 120.5 . . ?
C4 C3 H3 120.5 . . ?
C5 C4 C3 118.23(18) . . ?
C5 C4 H4 120.9 . . ?
C3 C4 H4 120.9 . . ?
N1 C5 C4 124.02(18) . . ?
N1 C5 H5 118.0 . . ?
C4 C5 H5 118.0 . . ?
Si1 C6 H6A 109.5 . . ?
Si1 C6 H6B 109.5 . . ?
H6A C6 H6B 109.5 . . ?
Si1 C6 H6C 109.5 . . ?
H6A C6 H6C 109.5 . . ?
H6B C6 H6C 109.5 . . ?
Si1 C7 H7A 109.5 . . ?
Si1 C7 H7B 109.5 . . ?
H7A C7 H7B 109.5 . . ?
Si1 C7 H7C 109.5 . . ?
H7A C7 H7C 109.5 . . ?
H7B C7 H7C 109.5 . . ?
Si1 C8 H8A 109.5 . . ?
Si1 C8 H8B 109.5 . . ?
H8A C8 H8B 109.5 . . ?
Si1 C8 H8C 109.5 . . ?
H8A C8 H8C 109.5 . . ?
H8B C8 H8C 109.5 . . ?
O2 Si2 C16 110.32(8) . . ?
O2 Si2 C14 101.46(9) . . ?
C16 Si2 C14 111.82(11) . . ?
O2 Si2 C15 111.36(9) . . ?
C16 Si2 C15 110.36(10) . . ?
C14 Si2 C15 111.24(13) . . ?
C9 O2 Si2 128.39(11) . . ?
C9 N2 C13 116.65(15) . . ?
N2 C9 O2 118.46(14) . . ?
N2 C9 C10 123.85(16) . . ?
O2 C9 C10 117.69(16) . . ?
C11 C10 C9 117.95(18) . . ?
C11 C10 H10 121.0 . . ?
C9 C10 H10 121.0 . . ?
C10 C11 C12 119.29(17) . . ?
C10 C11 H11 120.4 . . ?
C12 C11 H11 120.4 . . ?
C13 C12 C11 118.17(17) . . ?
C13 C12 H12 120.9 . . ?
C11 C12 H12 120.9 . . ?
N2 C13 C12 124.08(17) . . ?
N2 C13 H13 118.0 . . ?
C12 C13 H13 118.0 . . ?
Si2 C14 H14A 109.5 . . ?
Si2 C14 H14B 109.5 . . ?
H14A C14 H14B 109.5 . . ?
Si2 C14 H14C 109.5 . . ?
H14A C14 H14C 109.5 . . ?
H14B C14 H14C 109.5 . . ?
Si2 C15 H15A 109.5 . . ?
Si2 C15 H15B 109.5 . . ?
H15A C15 H15B 109.5 . . ?
Si2 C15 H15C 109.5 . . ?
H15A C15 H15C 109.5 . . ?
H15B C15 H15C 109.5 . . ?
Si2 C16 H16A 109.5 . . ?
Si2 C16 H16B 109.5 . . ?
H16A C16 H16B 109.5 . . ?
Si2 C16 H16C 109.5 . . ?
H16A C16 H16C 109.5 . . ?
H16B C16 H16C 109.5 . . ?
 
loop_
 _geom_torsion_atom_site_label_1
 _geom_torsion_atom_site_label_2
 _geom_torsion_atom_site_label_3
 _geom_torsion_atom_site_label_4
 _geom_torsion
 _geom_torsion_site_symmetry_1
 _geom_torsion_site_symmetry_2
 _geom_torsion_site_symmetry_3
 _geom_torsion_site_symmetry_4
 _geom_torsion_publ_flag
C7 Si1 O1 C1 -55.00(17) . . . . ?
C6 Si1 O1 C1 69.73(18) . . . . ?
C8 Si1 O1 C1 -171.17(16) . . . . ?
C5 N1 C1 O1 -179.61(16) . . . . ?
C5 N1 C1 C2 0.3(3) . . . . ?
Si1 O1 C1 N1 -9.9(2) . . . . ?
Si1 O1 C1 C2 170.19(13) . . . . ?
N1 C1 C2 C3 0.0(3) . . . . ?
O1 C1 C2 C3 179.86(16) . . . . ?
C1 C2 C3 C4 -0.5(3) . . . . ?
C2 C3 C4 C5 0.7(3) . . . . ?
C1 N1 C5 C4 0.0(3) . . . . ?
C3 C4 C5 N1 -0.4(3) . . . . ?
C16 Si2 O2 C9 -59.32(17) . . . . ?
C14 Si2 O2 C9 -177.97(17) . . . . ?
C15 Si2 O2 C9 63.58(17) . . . . ?
C13 N2 C9 O2 -178.90(15) . . . . ?
C13 N2 C9 C10 0.8(3) . . . . ?
Si2 O2 C9 N2 -7.7(2) . . . . ?
Si2 O2 C9 C10 172.55(14) . . . . ?
N2 C9 C10 C11 -0.8(3) . . . . ?
O2 C9 C10 C11 178.90(18) . . . . ?
C9 C10 C11 C12 0.0(3) . . . . ?
C10 C11 C12 C13 0.7(3) . . . . ?
C9 N2 C13 C12 -0.1(3) . . . . ?
C11 C12 C13 N2 -0.7(3) . . . . ?
 
_refine_diff_density_max    0.279
_refine_diff_density_min   -0.249
_refine_diff_density_rms    0.042

_shelx_res_file
;

    pyosime3_02.res created by SHELXL-2014/7

TITL PYOSIME3_01
CELL  0.71073 11.68760 24.89790 13.83320 90.00000 90.00000 90.00000
ZERR 16  0.00100  0.00270  0.00230  0.00000  0.00000  0.00000
LATT 1
SYMM -X+ 0.50000, -Y, Z+ 0.50000
SYMM X+ 0.50000, -Y+ 0.50000, -Z
SYMM -X, Y+ 0.50000, -Z+ 0.50000
SFAC C  H  N  O  Si
UNIT 128  208  16  16  16
omit 0 6 3
omit 5 11 5
omit 5 21 8
omit 1 13 5
omit 7 13 5
omit 6 0 2
omit 5 15 5
omit 6 15 5
omit 3 5 9
omit 1 6 3
omit 1 7 2
omit 1 20 7
omit 2 14 4
omit 0 22 5
omit 3 6 3
omit 3 4 10
omit 0 12 13
OMIT 0 50
L.S. 4
ACTA
BOND $H
FMAP 2
PLAN 20
SIZE 1.0 1.0 1.0
CONF
TEMP -53
WGHT    0.071200    0.638200
FVAR       0.42691
MOLE 1
SI1   5    0.142618    0.468451    0.682085    11.00000    0.05903    0.04950 =
         0.08937    0.01025    0.01991    0.00406
O1    4    0.144191    0.402354    0.657529    11.00000    0.05447    0.05488 =
         0.08107    0.00010   -0.00340    0.00399
N1    3    0.324277    0.384996    0.714122    11.00000    0.05267    0.04932 =
         0.07197   -0.00272   -0.00273   -0.00387
C1    1    0.226792    0.366631    0.680472    11.00000    0.05121    0.04882 =
         0.04952    0.00080    0.00646   -0.00095
C2    1    0.204077    0.312471    0.667015    11.00000    0.05707    0.05421 =
         0.06986   -0.00936    0.00468   -0.00962
AFIX  43
H2    2    0.133042    0.301010    0.642727    11.00000   -1.20000
AFIX   0
C3    1    0.287767    0.276054    0.690004    11.00000    0.07938    0.04373 =
         0.07526   -0.00091    0.00997   -0.00305
AFIX  43
H3    2    0.274856    0.239045    0.682158    11.00000   -1.20000
AFIX   0
C4    1    0.390604    0.294377    0.724614    11.00000    0.07366    0.05751 =
         0.06883    0.00350   -0.00360    0.01276
AFIX  43
H4    2    0.449764    0.270335    0.740317    11.00000   -1.20000
AFIX   0
C5    1    0.404724    0.348437    0.735636    11.00000    0.05960    0.06180 =
         0.08152   -0.00384   -0.01335    0.00165
AFIX  43
H5    2    0.475116    0.360830    0.759779    11.00000   -1.20000
AFIX   0
C6    1    0.251023    0.503542    0.608734    11.00000    0.08803    0.07975 =
         0.15489    0.04197    0.04904    0.00625
AFIX 137
H6A   2    0.326808    0.491907    0.628189    11.00000   -1.50000
H6B   2    0.244016    0.541985    0.618456    11.00000   -1.50000
H6C   2    0.239287    0.495201    0.540961    11.00000   -1.50000
AFIX   0
C7    1    0.162279    0.479105    0.812783    11.00000    0.10815    0.09289 =
         0.10431   -0.02955    0.02186    0.01459
AFIX 137
H7A   2    0.097111    0.464564    0.847430    11.00000   -1.50000
H7B   2    0.168590    0.517268    0.825837    11.00000   -1.50000
H7C   2    0.231489    0.461094    0.833917    11.00000   -1.50000
AFIX   0
C8    1   -0.005352    0.486556    0.646629    11.00000    0.07444    0.08002 =
         0.15563    0.03766    0.01371    0.02063
AFIX 137
H8A   2   -0.016302    0.479017    0.578458    11.00000   -1.50000
H8B   2   -0.017924    0.524494    0.658520    11.00000   -1.50000
H8C   2   -0.059278    0.465633    0.684350    11.00000   -1.50000
AFIX   0
SI2   5    0.555030    0.341237    0.449336    11.00000    0.05711    0.07146 =
         0.04534    0.00514    0.00542    0.01455
O2    4    0.630113    0.342717    0.345600    11.00000    0.05299    0.09553 =
         0.04863    0.00827    0.00488    0.01552
N2    3    0.479113    0.350673    0.239983    11.00000    0.05179    0.06352 =
         0.05639    0.00766    0.00213   -0.00093
C9    1    0.590878    0.349930    0.254355    11.00000    0.05378    0.05611 =
         0.04749    0.00247    0.00494    0.00567
C10   1    0.671235    0.355920    0.181131    11.00000    0.05474    0.08269 =
         0.05256    0.00184    0.00803    0.00386
AFIX  43
H10   2    0.750031    0.355602    0.194734    11.00000   -1.20000
AFIX   0
C11   1    0.631974    0.362324    0.088216    11.00000    0.07049    0.09201 =
         0.05088    0.00225    0.01283    0.00060
AFIX  43
H11   2    0.683809    0.366466    0.036797    11.00000   -1.20000
AFIX   0
C12   1    0.515484    0.362609    0.071169    11.00000    0.07910    0.07086 =
         0.04823    0.00031   -0.00646   -0.00304
AFIX  43
H12   2    0.486501    0.366557    0.008181    11.00000   -1.20000
AFIX   0
C13   1    0.443658    0.357001    0.148319    11.00000    0.05911    0.06222 =
         0.06109    0.00536   -0.00666   -0.00561
AFIX  43
H13   2    0.364452    0.357605    0.136572    11.00000   -1.20000
AFIX   0
C14   1    0.670295    0.332413    0.539644    11.00000    0.08450    0.14817 =
         0.05465    0.00799   -0.00677    0.03529
AFIX 137
H14A  2    0.712118    0.299655    0.525789    11.00000   -1.50000
H14B  2    0.637108    0.330147    0.603785    11.00000   -1.50000
H14C  2    0.722085    0.362812    0.536700    11.00000   -1.50000
AFIX   0
C15   1    0.453738    0.283965    0.451588    11.00000    0.10341    0.06845 =
         0.06369    0.00444    0.01686    0.00218
AFIX 137
H15A  2    0.402091    0.286549    0.396896    11.00000   -1.50000
H15B  2    0.410013    0.284848    0.511167    11.00000   -1.50000
H15C  2    0.496105    0.250528    0.447879    11.00000   -1.50000
AFIX   0
C16   1    0.477974    0.404851    0.466553    11.00000    0.06954    0.06821 =
         0.07341   -0.00195    0.00481    0.00750
AFIX 137
H16A  2    0.531305    0.434571    0.461531    11.00000   -1.50000
H16B  2    0.442514    0.405156    0.529949    11.00000   -1.50000
H16C  2    0.419427    0.408407    0.417267    11.00000   -1.50000
AFIX   0
HKLF 4

REM  PYOSIME3_01
REM R1 =  0.0419 for    3045 Fo > 4sig(Fo)  and  0.0478 for all    3522 data
REM    205 parameters refined using      0 restraints

END

WGHT      0.0712      0.6382

REM Highest difference peak  0.279,  deepest hole -0.249,  1-sigma level  0.042
Q1    1   0.1523  0.4760  0.7483  11.00000  0.05    0.28
Q2    1   0.5795  0.3382  0.3796  11.00000  0.05    0.20
Q3    1   0.4738  0.3421  0.2012  11.00000  0.05    0.16
Q4    1   0.4480  0.3485  0.2964  11.00000  0.05    0.15
Q5    1   0.5916  0.3389  0.5189  11.00000  0.05    0.15
Q6    1   0.1498  0.4073  0.7175  11.00000  0.05    0.14
Q7    1   0.6301  0.3434  0.2159  11.00000  0.05    0.14
Q8    1   0.5194  0.2785  0.4825  11.00000  0.05    0.14
Q9    1   0.1821  0.4202  0.5665  11.00000  0.05    0.13
Q10   1   0.6047  0.3357  0.2978  11.00000  0.05    0.13
Q11   1   0.5068  0.2724  0.5053  11.00000  0.05    0.13
Q12   1   0.6452  0.3416  0.1445  11.00000  0.05    0.13
Q13   1   0.2258  0.5243  0.5636  11.00000  0.05    0.13
Q14   1   0.6456  0.3666  0.1414  11.00000  0.05    0.12
Q15   1   0.5130  0.3419  0.2431  11.00000  0.05    0.12
Q16   1   0.6412  0.3556 -0.0366  11.00000  0.05    0.12
Q17   1   0.5028  0.4251  0.5088  11.00000  0.05    0.11
Q18   1   0.4883  0.3771  0.1197  11.00000  0.05    0.11
Q19   1   0.1452  0.3061  0.5846  11.00000  0.05    0.10
Q20   1   0.4799  0.4224  0.4016  11.00000  0.05    0.10
;
_shelx_res_checksum    9312

_shelx_hkl_file
;
 -12  -9   0   40.43    1.52   0
 -12   6  -7    0.48    0.70   0
 -11  -3  -4   80.70    1.46   0
 -11   2  -6    5.51    0.91   0
 -11  10  -8    0.85    0.78   0
 -10  -5  -3    8.69    1.07   0
 -10  -3  -4   11.77    0.98   0
 -10   2  -6   26.77    0.94   0
  -9  -3  -4   60.60    1.57   0
  -9   2  -6   16.95    1.05   0
  -8 -14   7   14.96    1.09   0
  -8   6  -7    9.87    1.02   0
  -8  11  -8    2.66    1.00   0
  -7 -14   8   23.28    1.01   0
  -7   3  -6    6.63    1.05   0
  -7  12  -8   10.56    1.01   0
  -6  -8   0  111.11    3.27   0
  -6   1  -5   10.58    0.98   0
  -6   8  -7  175.99    1.92   0
  -6  15  -8    4.52    0.99   0
  -5 -13  13    9.41    0.76   0
  -5 -11   4    6.66    1.23   0
  -5  10  -7   20.03    1.00   0
  -4 -12  14    0.99    0.71   0
  -4  13  -7   10.65    0.90   0
  -3 -11  14   27.88    0.98   0
  -3  10  -6  139.77    1.54   0
  -3  19  -7    0.44    0.86   0
  -3  21  -7   11.43    0.87   0
  -2 -10  14    3.99    0.57   0
  -2  -8   4    2.22    0.88   0
  -2  14  -6   41.81    1.33   0
  -2  26  -6    0.44    0.85   0
  -1  -9   9  258.02    1.99   0
  -1  -9  12    7.31    0.84   0
  -1  -9  13   -0.45    0.58   0
  -1  -8   6    7.51    0.68   0
  -1  12  -5   35.67    1.22   0
  -1  28  -5    0.44    0.79   0
   0  -7  14    0.61    0.76   0
   0  -6  16   11.77    0.73   0
   0  -5   4    1.18    0.74   0
   0  -4   3  449.53    3.64   0
   1  -6  11    4.94    0.69   0
   1  -5   7   64.81    1.21   0
   1  -4  16    0.11    0.77   0
   2  -3  14   10.96    0.84   0
   2  -2  16    0.36    0.55   0
   3  -1   9  272.93    2.00   0
   3  -1  13   39.03    0.84   0
   3   0  15   -0.26    0.51   0
   3  25  -1    0.41    0.98   0
   4   2   9   26.41    1.06   0
   4   2  12    4.03    0.79   0
   4   3   7   13.77    0.98   0
   5   6   9   -0.06    0.64   0
   5   6  10    8.14    0.78   0
   5   6  12   20.32    0.83   0
   5   7  14   -0.57    0.59   0
   6  12  10    0.75    0.58   0
   6  12  11    0.06    0.58   0
   6  13  13    4.10    0.59   0
   6  16   7    2.70    0.94   0
 -13  -6  -2   24.71    1.20   0
 -13   0  -5   -0.13    0.91   0
 -12   2  -6   -0.08    0.91   0
 -11  -5  -3    3.24    0.95   0
 -11  -1  -5   47.46    1.19   0
 -11   5  -7    1.02    0.89   0
 -10  -1  -5    6.41    1.00   0
 -10   5  -7   10.01    0.78   0
 -10   9  -8    8.69    0.92   0
  -9  -8  -1    2.53    1.28   0
  -9  -5  -3   23.27    1.39   0
  -9  -1  -5    3.46    0.91   0
  -9   5  -7   17.37    1.11   0
  -8  -9   0   54.62    2.51   0
  -8   2  -6   58.49    1.31   0
  -8  10  -8    5.05    0.99   0
  -7   0  -5   -0.92    1.13   0
  -6  14  -8   12.75    0.80   0
  -5 -13   9   -1.31    0.85   0
  -5 -13  12    1.05    0.70   0
  -5   2  -5   29.86    1.10   0
  -5   5  -6   56.19    1.32   0
  -5  18  -8    2.20    0.94   0
  -5  20  -8    6.19    0.94   0
  -5  22  -8   18.74    1.02   0
  -5  23  -8   20.64    0.97   0
  -4 -12   8    8.64    0.97   0
  -4 -12  13   15.00    0.88   0
  -3 -11   8   89.49    1.52   0
  -3 -11  13   38.22    1.00   0
  -3   0  -3    0.69    1.06   0
  -3  17  -7   18.22    1.01   0
  -3  18  -7   -0.21    0.72   0
  -3  22  -7    0.13    0.64   0
  -3  23  -7    2.65    0.88   0
  -3  24  -7    1.96    0.77   0
  -2 -10   8   11.94    0.97   0
  -2 -10  13    4.88    0.72   0
  -2  27  -6    9.53    0.72   0
  -1  -9  10   -0.10    0.82   0
  -1  -9  11   46.54    1.02   0
  -1  -8  15    1.31    0.55   0
  -1   7  -4   46.77    1.32   0
   0  -7  13    0.69    0.80   0
   0   7  -3    0.58    1.04   0
   0  11  -4   -0.19    0.97   0
   1  -5  14   52.68    0.91   0
   2  -3  13    2.61    0.82   0
   2  -2  15   39.06    0.93   0
   2  28  -2    4.80    0.87   0
   3  -1  10   65.65    1.27   0
   3   0  14    0.46    0.72   0
   4   2  11    0.09    0.51   0
   4   3  14    3.48    0.51   0
   4   4   6   -0.46    0.84   0
   4   4  15    0.60    0.60   0
   4   5   5   67.17    1.44   0
   5   7  13    0.67    0.68   0
   5  17   3    3.73    1.84   0
   6  13  10    6.53    0.64   0
   6  13  11    2.42    0.59   0
   6  13  12    0.50    0.54   0
 -12  -5  -3    0.43    0.98   0
 -12  -3  -4   -1.52    0.91   0
 -12  -1  -5   41.31    1.16   0
 -12   5  -7    0.61    0.93   0
 -11   9  -8    8.39    0.75   0
  -9   9  -8    6.54    0.73   0
  -8 -13   5   26.61    1.51   0
  -8  -3  -4   82.89    1.73   0
  -8   5  -7    3.87    0.98   0
  -7 -14   9   11.64    0.85   0
  -7 -14  10   -0.34    0.79   0
  -7 -14  11   10.93    0.88   0
  -7   6  -7    3.50    0.83   0
  -7  11  -8   14.12    0.85   0
  -6 -13   7   13.71    0.93   0
  -6 -10   2    4.96    1.96   0
  -6   7  -7   93.53    1.68   0
  -6  13  -8    7.00    0.71   0
  -5 -13  10    0.98    0.71   0
  -5 -13  11    8.06    0.65   0
  -5 -12   6  412.07    3.14   0
  -5   9  -7   10.21    0.84   0
  -4 -12   9   35.25    1.03   0
  -4 -12  12    3.30    0.81   0
  -4  11  -7   47.39    1.42   0
  -3 -11  12   25.33    0.92   0
  -3 -10  15    1.11    0.75   0
  -3   5  -5   -0.23    0.97   0
  -3  25  -7    3.46    0.87   0
  -2 -10   9  145.63    1.74   0
  -2 -10  11    2.68    0.72   0
  -2 -10  12    0.61    0.72   0
  -2  -9  15   10.74    0.77   0
  -2  -5   1   77.43    3.02   0
  -1  -8  14    1.54    0.77   0
  -1  11  -5    1.43    0.97   0
   0  -7   8    0.50    0.59   0
   0  -7  12   -2.16    0.76   0
   0  -6  15    5.37    0.71   0
   0   4  -2    0.30    0.94   0
   0  19  -5   -0.05    0.91   0
   0  21  -5    0.52    1.01   0
   0  22  -5  124.79    2.10   0
   1  -5   8  204.95    1.72   0
   1  -5  13    4.33    0.82   0
   1  -4  15    0.63    0.71   0
   1  11  -3    7.41    1.08   0
   1  21  -4  207.07    2.17   0
   1  22  -4   14.60    1.21   0
   2  -3   8  217.60    1.66   0
   2  -3  12   30.27    0.90   0
   2  -2   6  566.29    2.93   0
   2  -1  16    0.28    0.75   0
   3   1  15    4.28    0.70   0
   3  15  -1  196.17    3.52   0
   3  26  -1    4.99    1.04   0
   4   3  13   20.90    0.82   0
   4  27   1    8.58    1.42   0
   5   7   9   27.68    1.02   0
   5   7  12    6.20    0.71   0
   5   8  14    2.33    0.48   0
   5  13   4   40.29    1.84   0
   6  14  11   -0.18    0.61   0
   6  14  12    0.39    0.55   0
   6  15   8    0.92    0.71   0
 -12  -8  -1    3.17    1.05   0
 -11   1  -6   86.40    1.42   0
 -11   4  -7    7.71    0.86   0
 -11   8  -8    2.08    0.87   0
 -10   1  -6   23.17    1.14   0
 -10   4  -7  163.54    1.71   0
 -10   8  -8    1.32    0.89   0
  -9 -14   7    0.39    0.90   0
  -9   8  -8    4.10    0.89   0
  -9  15  -9   -0.45    0.90   0
  -8 -14   8   20.43    1.16   0
  -8  -1  -5   -0.13    1.14   0
  -8   9  -8  151.24    1.74   0
  -8  16  -9    1.27    0.81   0
  -8  17  -9    0.40    0.93   0
  -8  18  -9    0.19    0.65   0
  -7  -6  -2   19.09    1.28   0
  -7  10  -8   -0.19    1.00   0
  -6  12  -8   12.85    0.77   0
  -5  -6  -1   83.46    2.23   0
  -4 -12  10   15.98    0.97   0
  -4 -12  11    8.57    0.85   0
  -4 -10   4   99.39    1.79   0
  -4  -5  -1  810.21    6.38   0
  -4   3  -5 1481.46    4.79   0
  -3 -11   9   -0.30    0.84   0
  -3 -11  10  112.81    1.41   0
  -3 -11  11   55.50    1.19   0
  -3  -9   4    2.69    0.85   0
  -3   2  -4  368.40    2.77   0
  -3  15  -7    6.43    0.83   0
  -2 -10  10  122.62    1.31   0
  -2  -9   6   10.40    0.87   0
  -2  -7   3  644.02    4.20   0
  -2   4  -4  225.62    2.21   0
  -1  -8   7   36.87    1.10   0
  -1  -7   5    1.82    0.89   0
  -1  20  -6   43.28    1.20   0
  -1  21  -6    0.04    0.90   0
   0  -7   9   -0.10    0.72   0
   0  -7  10   -0.12    1.06   0
   0  -7  11    0.88    0.85   0
   0  -5  16   -0.17    0.68   0
   0  17  -5    0.76    1.10   0
   0  23  -5   -0.16    0.92   0
   0  24  -5    0.09    0.74   0
   1  -5  12   20.12    0.87   0
   1  -4   6    0.61    0.87   0
   1  -3  16    2.66    0.76   0
   1  18  -4   78.97    1.71   0
   1  23  -4    5.34    1.02   0
   1  24  -4    4.68    1.08   0
   2  -3   9  109.89    1.40   0
   2  -3  10    9.85    0.95   0
   2  -3  11   91.66    1.48   0
   2  -2  14   -0.10    0.73   0
   2  12  -2   84.56    1.88   0
   2  29  -2    5.81    0.90   0
   3   0   8  304.13    2.10   0
   3   0  13   -0.17    0.58   0
   3   1   6 1358.70    4.53   0
   4   3   9  159.24    1.66   0
   4   3  12   13.37    0.83   0
   4   4  14    7.32    0.69   0
   4   5  15    1.38    0.70   0
   5   7  10    1.56    0.66   0
   5   7  11    0.56    0.64   0
   5   8  13   54.36    1.12   0
   5   9  14   -0.21    0.69   0
   5  11   5    1.33    1.19   0
   6  14  10   -0.03    0.59   0
   6  15  12    2.26    0.60   0
   6  19   7    0.82    0.96   0
   6  20   7    0.47    1.01   0
   6  22   7    0.52    1.14   0
 -13 -10   1    9.65    1.33   0
 -13  -9   0   -0.11    0.98   0
 -13  -3  -4    7.57    0.96   0
 -13  -1  -5    8.45    0.88   0
 -12   1  -6    2.44    0.88   0
 -12   4  -7    5.29    0.98   0
 -11  -7  -2   29.68    1.32   0
 -10 -14   7    2.66    0.92   0
 -10  -7  -2    1.47    1.06   0
  -9   1  -6   81.52    1.31   0
  -9   4  -7    4.18    0.75   0
  -9  14  -9    3.76    0.98   0
  -8  -5  -3  102.97    1.78   0
  -8  15  -9   34.80    1.08   0
  -7 -13   6    1.85    0.82   0
  -7   2  -6   27.61    1.23   0
  -7   5  -7   15.88    1.11   0
  -7  18  -9    3.88    0.92   0
  -7  19  -9   13.51    1.06   0
  -6 -12   5  144.97    2.30   0
  -6  -2  -4   22.23    1.01   0
  -6   3  -6   65.89    1.27   0
  -6  11  -8  274.94    1.96   0
  -5  -1  -4    1.58    0.96   0
  -5   8  -7  268.66    2.01   0
  -5  14  -8    4.46    0.70   0
  -4 -11   6    0.70    1.03   0
  -4 -11  14   15.91    0.90   0
  -4   6  -6   57.70    1.16   0
  -4  22  -8   12.08    0.87   0
  -3 -10   6  133.42    1.74   0
  -3 -10  14    9.62    0.82   0
  -3   8  -6   32.30    1.09   0
  -3  14  -7   65.30    1.28   0
  -2  -9  14   32.87    0.83   0
  -2   7  -5  201.42    2.04   0
  -1  -8  13    5.68    0.62   0
  -1  -7  15    0.48    0.65   0
  -1  18  -6    0.83    1.03   0
  -1  19  -6    6.43    1.11   0
  -1  22  -6   34.21    1.19   0
  -1  24  -6   -0.99    0.79   0
   0  -6  14   36.19    0.81   0
   0  10  -4  230.87    2.30   0
   0  16  -5    0.51    1.01   0
   0  25  -5    0.06    0.87   0
   1  -5  10    5.21    0.93   0
   1  -4  14   -0.52    0.66   0
   1   7  -2 1087.53    6.72   0
   1  17  -4  256.82    2.48   0
   1  25  -4    3.96    1.08   0
   2  -1   5 1615.47    5.33   0
   2  -1  15    1.04    0.73   0
   2  20  -3    4.01    1.16   0
   2  21  -3    8.10    1.17   0
   3   0   9   -1.21    0.92   0
   3   0  11   -0.29    0.84   0
   3   0  12  204.74    1.51   0
   3   1  14   56.96    1.05   0
   3   2   5  131.63    1.73   0
   3  27  -1   -0.16    1.10   0
   4   3  10    8.32    0.86   0
   4   3  11   45.22    0.88   0
   4   4   7  439.53    2.69   0
   4   4  13   45.67    1.01   0
   5   8   8    0.00    0.97   0
   5   8  12   11.58    0.74   0
   6  16   9    2.76    0.76   0
 -13  -5  -3    0.87    0.83   0
 -11   7  -8   12.93    1.01   0
 -10  -2  -5   27.50    1.28   0
 -10   7  -8    1.40    0.89   0
 -10  12  -9    0.11    0.84   0
  -9  -7  -2    0.19    1.14   0
  -9   7  -8   18.13    0.99   0
  -9  13  -9   11.75    0.77   0
  -8 -14   9    1.45    0.72   0
  -8 -14  10    8.21    0.87   0
  -8  -8  -1   32.74    1.75   0
  -8   1  -6   -0.85    1.12   0
  -8   4  -7    0.52    0.98   0
  -8   8  -8   -0.10    0.83   0
  -7   9  -8   17.79    0.76   0
  -7  17  -9   11.52    0.73   0
  -6 -13   8    4.62    0.80   0
  -6 -13  11    6.40    0.90   0
  -6 -13  12    1.44    0.72   0
  -6   0  -5   -0.67    0.89   0
  -5 -12  13    1.86    0.80   0
  -5   4  -6  401.83    2.40   0
  -5  13  -8    0.58    0.89   0
  -4  23  -8    1.71    0.85   0
  -4  24  -8    1.11    0.91   0
  -2  -9  13    3.57    0.74   0
  -2  -6   2  596.13    5.14   0
  -1  -8   8    4.70    1.03   0
  -1  -8  12   -0.49    0.71   0
  -1  -6  16    7.00    0.77   0
  -1  17  -6  133.37    1.73   0
  -1  25  -6    1.58    0.81   0
   0  -6  13   49.06    1.09   0
   0  -5  15    1.40    0.74   0
   0  26  -5   14.73    1.02   0
   1  -3  15    7.04    0.74   0
   1  16  -4  115.50    1.88   0
   1  26  -4    1.13    0.98   0
   2  -2   7  683.31    3.09   0
   2  -2  13   10.51    0.72   0
   2   0   4 1614.79    6.01   0
   2   0  16    2.60    0.54   0
   2   1   3    5.71    0.90   0
   2  19  -3   69.94    1.67   0
   2  22  -3    2.46    1.00   0
   2  23  -3    0.05    1.07   0
   3   0  10   68.96    1.10   0
   3   2  15   -0.89    0.51   0
   3   3   4  326.03    2.79   0
   3   3  16    0.45    0.49   0
   4   5   6  271.02    2.26   0
   4   5  14    0.41    0.61   0
   4   6  15    3.79    0.73   0
   4  11   2  282.44    4.77   0
   5   8   9  121.09    1.55   0
   5   8  10    8.07    0.72   0
   5   8  11    6.04    0.80   0
   5   9   7    5.57    1.02   0
   5   9  13    0.64    0.60   0
   5  10  14    3.44    0.64   0
   6  16  11    0.22    0.59   0
 -13  -8  -1    8.79    1.28   0
 -12  -7  -2    1.00    0.95   0
 -11  -4  -4   27.89    1.19   0
 -11  -2  -5    5.66    0.96   0
 -11   3  -7    2.64    0.87   0
 -10  -4  -4   46.84    1.31   0
 -10   3  -7    0.16    0.94   0
 -10  11  -9    1.48    0.86   0
  -9 -14   8    1.49    0.80   0
  -9 -13   5   10.71    1.38   0
  -9  -2  -5    2.52    0.90   0
  -9  12  -9    1.34    0.90   0
  -7  -3  -4  111.31    1.79   0
  -7  -1  -5   31.36    1.23   0
  -7  15  -9   70.37    1.14   0
  -6 -13   9    3.63    0.77   0
  -6 -13  10   15.23    0.87   0
  -6  -4  -3  316.79    2.70   0
  -6  10  -8    2.07    0.74   0
  -6  18  -9    1.32    0.84   0
  -6  19  -9   -1.42    0.90   0
  -6  20  -9    0.78    0.95   0
  -6  21  -9    1.54    0.93   0
  -5 -10   3  439.87    4.18   0
  -5   1  -5    2.55    0.92   0
  -5   7  -7    3.03    1.15   0
  -5  12  -8    0.22    0.88   0
  -4 -11  13   -0.77    0.79   0
  -4  -2  -3   47.55    1.38   0
  -4   0  -4  146.65    1.84   0
  -4   9  -7  281.82    2.20   0
  -3 -10  13    0.17    0.83   0
  -3  -9  15   14.57    0.90   0
  -2  -9   7   58.35    1.26   0
  -2  -8  15   22.78    0.76   0
  -2  20  -7    4.02    1.02   0
  -2  21  -7   -0.55    0.98   0
  -2  23  -7    1.62    0.81   0
  -1  -8   9   23.44    1.07   0
  -1  -8  10   38.42    1.20   0
  -1  -8  11  300.34    1.88   0
  -1  -7  14   22.89    0.96   0
  -1   6  -4   54.52    1.41   0
  -1  16  -6   44.48    1.17   0
  -1  26  -6   12.39    0.99   0
   0  -6   7  300.92    2.16   0
   0  -5   5   -0.02    0.84   0
   0  -4  16    1.15    0.68   0
   0  15  -5    0.74    1.16   0
   0  27  -5    0.30    0.74   0
   1  -4   7   51.43    1.14   0
   1  -4  13    2.52    0.62   0
   1  -3   5  441.03    2.87   0
   1  -2  16   -1.19    0.65   0
   1  10  -3  399.22    3.22   0
   1  15  -4  210.41    2.49   0
   2  -1  14   36.99    0.97   0
   2  18  -3   67.85    1.86   0
   2  24  -3    1.75    1.14   0
   3   1   7    2.58    0.77   0
   3  14  -1  100.33    2.62   0
   4   4   8  176.33    1.80   0
   4   4  12    3.73    0.61   0
   4   6   5  126.84    1.83   0
   5   9  12    2.02    0.71   0
   5  11  14    0.71    0.64   0
   5  14   4  344.22    4.17   0
   6  18   9   -0.01    0.80   0
   6  19   8   -0.10    0.76   0
   6  20   8   -0.02    0.99   0
   6  22   8    0.00    1.31   0
 -12  -4  -4   25.95    1.13   0
 -12  -2  -5   17.50    1.04   0
 -12   3  -7   22.50    0.86   0
 -11   0  -6    8.86    0.98   0
 -11   6  -8    3.37    0.94   0
 -10 -14   8    4.45    0.92   0
 -10 -12   3    6.50    2.18   0
  -9 -14   9    1.64    0.85   0
  -9  -4  -4    5.98    1.10   0
  -9   0  -6   15.77    0.98   0
  -9   6  -8    3.52    0.92   0
  -9  11  -9   -0.56    0.91   0
  -8   7  -8  113.24    1.44   0
  -8  12  -9    6.73    1.05   0
  -7 -13   7   59.40    1.52   0
  -7   4  -7  132.78    1.74   0
  -7   8  -8   11.44    0.80   0
  -7  14  -9   16.54    0.85   0
  -6  -7  -1  233.64    3.35   0
  -6   9  -8   10.31    0.99   0
  -6  16  -9   12.90    0.96   0
  -6  17  -9   38.52    1.12   0
  -5 -12   8   -0.13    0.97   0
  -5 -12  12    7.29    0.61   0
  -4 -11   7   43.80    1.29   0
  -4 -11  12   14.41    0.93   0
  -4   5  -6  345.28    2.29   0
  -4  15  -8   11.49    0.96   0
  -3 -10   7   19.78    1.11   0
  -3  -8   3   77.96    1.85   0
  -2  -9   8  499.59    2.75   0
  -2  -9  12    5.06    0.64   0
  -2  -8   5  521.55    3.13   0
  -2  10  -6  495.70    2.74   0
  -2  17  -7  170.59    1.76   0
  -2  18  -7    1.10    0.68   0
  -2  24  -7    4.21    0.91   0
  -2  25  -7    6.53    0.81   0
  -1  -6   4   49.69    1.35   0
  -1  15  -6   75.14    1.52   0
  -1  27  -6    0.65    0.90   0
   0  -6   8  119.93    1.46   0
   0  -5  14    1.11    0.77   0
   0   6  -3 1478.35    7.76   0
   0  14  -5  438.27    3.00   0
   0  28  -5    1.89    0.74   0
   1  -4  12  140.80    1.42   0
   1  -3  14    1.25    0.71   0
   1  27  -4   33.97    1.15   0
   2  -2   8    1.85    0.67   0
   2  -2   9   84.40    1.34   0
   2  -2  10   38.53    1.15   0
   2  -2  11   95.84    1.31   0
   2   0  15    0.32    0.67   0
   2   8  -1   92.68    2.73   0
   2  17  -3    3.51    1.19   0
   2  25  -3    1.47    1.00   0
   3   1  12   21.11    0.78   0
   3   2  14   -0.79    0.55   0
   3   3  15   -0.41    0.61   0
   3  28  -1    7.93    1.08   0
   4   4   9   28.65    1.21   0
   4   4  10   16.43    0.96   0
   4   5  13   -0.64    0.56   0
   4   7  15   52.14    1.06   0
   4  28   1   15.47    1.56   0
   5   9   8   12.69    0.97   0
   5   9  11    2.49    0.72   0
   5  10  13    1.00    0.49   0
   5  23   3    0.07    2.25   0
   6  18  10    0.00    0.66   0
   6  19   9    0.03    0.81   0
   6  20   9    0.00    1.06   0
   6  21   9   -0.00    1.21   0
 -13  -2  -5   -0.81    0.77   0
 -12   0  -6   19.71    1.04   0
 -11  -6  -3   17.85    1.18   0
 -10  -6  -3   -0.04    1.07   0
 -10  10  -9   15.07    0.98   0
  -9  10  -9   40.56    1.10   0
  -8  -2  -5    3.15    1.09   0
  -8   3  -7  388.97    2.40   0
  -8  11  -9   -0.85    0.94   0
  -7 -13  12    3.38    0.69   0
  -7   1  -6  150.25    1.90   0
  -7  13  -9    0.86    0.67   0
  -6   2  -6   95.11    1.41   0
  -6   5  -7   21.86    0.99   0
  -6  15  -9   33.75    1.09   0
  -5 -12   9    0.65    0.84   0
  -5 -12  10    0.40    0.82   0
  -5 -12  11   25.45    0.94   0
  -5 -11  14    1.73    0.76   0
  -5  11  -8   26.60    0.92   0
  -4  -9   3  168.34    2.59   0
  -4   2  -5  939.88    3.96   0
  -2  -9  11  103.18    1.21   0
  -2  -8  14    5.77    0.60   0
  -2   1  -3    6.07    1.17   0
  -2  16  -7    7.15    1.10   0
  -2  26  -7    0.36    0.87   0
  -1  -7   6   79.32    1.33   0
  -1  -7  13   21.77    0.86   0
  -1  -6  15   -0.02    0.54   0
  -1   9  -5  160.54    1.85   0
   0  -6   9   29.71    1.07   0
   0  -6  10  569.70    2.71   0
   0  -6  11   89.40    1.17   0
   0   9  -4    0.21    0.94   0
   1  -4   8  118.87    1.46   0
   1  -4  11   38.80    1.05   0
   1  -2  15   -0.45    0.69   0
   1  28  -4    8.13    0.86   0
   2  -1   6  563.70    3.23   0
   2  -1  13   27.97    0.96   0
   2  11  -2  483.96    4.20   0
   2  26  -3    6.54    1.07   0
   3   1   8   32.68    1.09   0
   3   1   9  283.29    2.05   0
   3   1  10   66.43    1.24   0
   3   1  11   97.62    1.32   0
   3   2  13   13.21    0.87   0
   4   5   7   58.72    1.27   0
   4   5  12   57.34    1.16   0
   5   9   9   -0.12    0.69   0
   5   9  10    0.46    0.62   0
   5  11   6    1.70    1.11   0
   5  11  13    0.04    0.63   0
   5  19   3    0.03    1.49   0
 -13  -7  -2    2.50    0.97   0
 -13  -4  -4   26.61    1.07   0
 -12  -6  -3    0.15    0.94   0
 -12   2  -7    0.83    0.79   0
 -11 -13   5   17.92    1.69   0
 -11   2  -7    0.87    0.94   0
 -11   5  -8    3.92    0.94   0
 -10 -13   5   67.16    2.19   0
 -10   2  -7   13.50    1.09   0
 -10   5  -8    2.09    0.98   0
 -10   9  -9    0.45    0.85   0
  -8 -13   6   13.65    1.19   0
  -8  -7  -2   -0.06    1.19   0
  -8  -4  -4    1.66    1.21   0
  -8   0  -6   42.19    1.27   0
  -7 -13   8    0.76    0.96   0
  -7 -13  11   30.72    1.05   0
  -7  -5  -3    0.37    1.06   0
  -7   7  -8   27.05    0.89   0
  -7  12  -9    7.21    0.74   0
  -6 -12   6   39.61    1.46   0
  -6 -12  13    6.82    0.74   0
  -6  14  -9    0.59    0.94   0
  -5   3  -6   18.81    0.91   0
  -5   6  -7   17.74    1.18   0
  -5  10  -8   61.39    1.29   0
  -5  19  -9    4.37    0.92   0
  -5  20  -9    0.12    0.92   0
  -5  21  -9    3.56    0.71   0
  -5  22  -9   -1.58    0.95   0
  -4 -11   8  223.83    2.03   0
  -4 -11   9    0.80    0.81   0
  -4 -11  10   90.88    1.34   0
  -4 -11  11    6.05    0.64   0
  -4 -10  14   15.64    0.79   0
  -4   8  -7    5.30    1.10   0
  -4  13  -8   -0.50    0.96   0
  -3 -10   8  169.93    1.77   0
  -3 -10   9   79.35    1.34   0
  -3 -10  10   11.92    0.92   0
  -3  -9  14   -0.39    0.57   0
  -3  20  -8    3.01    0.89   0
  -3  22  -8    0.45    0.88   0
  -3  23  -8   -1.16    0.86   0
  -3  24  -8    0.70    0.82   0
  -2  -7  15    8.33    0.85   0
  -1  -7  12    5.76    0.84   0
  -1   3  -3  138.91    2.28   0
   0  -5  13   -0.10    0.81   0
   0  -3  16    0.54    0.69   0
   0  13  -5   -0.04    1.01   0
   1  -4   9  101.11    1.28   0
   1  -4  10  178.10    1.55   0
   1  -3  13   83.86    1.24   0
   1  -2   4  720.49    4.05   0
   1  -1  16   30.60    0.82   0
   1  14  -4  265.65    2.60   0
   2  -1  12   29.49    0.93   0
   2   0  14   11.28    0.81   0
   2   2  16    1.86    0.72   0
   2   4   1  753.50    8.56   0
   2  16  -3    1.61    1.25   0
   3   2   6    2.68    0.83   0
   3   3  14   -1.83    0.76   0
   3   4  15    2.55    0.69   0
   4   5  11    3.77    0.74   0
   4   6  13   26.68    0.91   0
   4   7  14   -1.28    0.67   0
   4   8  15   28.94    0.87   0
 -11  -3  -5    3.87    1.04   0
  -9  -6  -3   60.11    1.52   0
  -9   2  -7   -0.40    0.99   0
  -9   5  -8   -0.82    1.02   0
  -9   9  -9   24.10    1.05   0
  -8  10  -9    1.85    0.67   0
  -7 -13   9    0.54    0.75   0
  -7 -13  10   20.53    0.89   0
  -7  11  -9    1.43    0.98   0
  -6 -12  12   -0.59    0.77   0
  -6   8  -8    4.94    0.91   0
  -6  13  -9    2.50    1.03   0
  -5 -11  13   -0.62    0.77   0
  -5  -5  -2   19.34    1.38   0
  -4 -10   5   61.39    1.55   0
  -4  12  -8    9.76    1.03   0
  -3  -9   5   95.44    1.55   0
  -3  -8  15    1.12    0.84   0
  -3  -4  -1 1016.32    8.03   0
  -3   1  -4 1293.33    5.07   0
  -3  10  -7   21.94    1.24   0
  -3  17  -8    1.72    0.96   0
  -3  18  -8    6.21    0.76   0
  -3  25  -8    6.11    0.88   0
  -2  -8  13    8.78    0.62   0
  -2  -1  -2  847.36    6.00   0
  -2   9  -6   13.30    1.02   0
  -1  -7   7   18.72    1.04   0
  -1  -6  14    1.34    0.67   0
  -1   1  -2  165.90    2.74   0
  -1  13  -6   41.76    1.39   0
   0  -5   6    0.33    1.04   0
   0  -4   4  968.36    4.70   0
   1  -3   6   13.79    0.91   0
   2  -1   7  782.21    3.26   0
   2   1  15    1.06    0.57   0
   2  27  -3    4.26    0.91   0
   3   2  12   52.13    0.98   0
   4   5   8  161.22    1.78   0
   4   5   9    1.35    0.90   0
   4   5  10   55.25    1.22   0
   5  10  10    6.84    0.74   0
   5  11  12    3.50    0.59   0
   5  12  13   -0.25    0.60   0
   5  15   4    4.05    1.55   0
 -12  -3  -5    6.31    0.90   0
 -12  -1  -6    1.51    0.78   0
 -11  -1  -6   86.09    1.44   0
 -11   4  -8    6.70    0.85   0
 -10  -3  -5   44.27    1.30   0
 -10  -1  -6   22.65    1.17   0
 -10   8  -9   62.82    1.25   0
  -8   2  -7  140.60    1.71   0
  -8   5  -8   -0.08    0.92   0
  -8   9  -9    0.61    0.89   0
  -8  16 -10    3.49    0.93   0
  -7   3  -7  390.38    2.51   0
  -7   6  -8   15.20    1.12   0
  -6  -1  -5   10.96    1.02   0
  -6   4  -7    0.37    1.12   0
  -6  12  -9   63.61    1.37   0
  -5   9  -8   20.88    1.18   0
  -5  15  -9   20.05    1.04   0
  -5  16  -9   14.61    0.83   0
  -4 -10  13   -0.22    0.76   0
  -4   4  -6   -0.39    0.91   0
  -4   7  -7  193.41    1.94   0
  -3  -9  13   10.76    0.66   0
  -3  -1  -3    5.21    1.08   0
  -3   6  -6  764.45    3.41   0
  -2  -8   6    3.41    1.03   0
  -2  -8  12   23.19    0.95   0
  -1  -7   8   18.59    1.09   0
  -1  -7  10  100.68    1.47   0
  -1  -7  11   63.05    1.04   0
  -1  -5   3    6.92    1.18   0
  -1  -5  15    0.30    0.67   0
   0  -5  12   -0.37    0.54   0
   0  -4  14   -0.62    0.54   0
   1  -3  12    8.55    0.65   0
   1  -2  14    2.53    0.57   0
   1  -1   3 3750.40   10.20   0
   1  -1  15   -0.10    0.70   0
   1   0  16   12.18    0.84   0
   1   9  -3    1.98    1.11   0
   1  13  -4   31.35    1.27   0
   2  -1  10  206.20    1.80   0
   2   0   5    0.46    0.88   0
   2   0  13   -0.30    0.78   0
   2  15  -3   41.59    1.57   0
   2  28  -3    6.80    1.07   0
   3   2   7   18.65    0.93   0
   3   2  11   60.37    1.19   0
   3   3   5  183.88    1.98   0
   3   3  13   31.80    0.98   0
   3   4  14   13.71    0.83   0
   3   5  15    7.93    0.81   0
   3   8   1 1434.61   13.59   0
   4   6  12    0.74    0.56   0
   4   7  13   19.27    0.86   0
   4   8   4    4.99    0.95   0
   4   8  14    1.39    0.66   0
   4  21   0   77.02    2.74   0
   4  22   0  137.78    3.59   0
   5  13   5    6.88    1.03   0
   5  22   3    5.92    2.22   0
 -13  -6  -3   23.10    1.15   0
 -11  -5  -4   18.50    1.00   0
 -11   1  -7    2.60    0.87   0
 -10  -5  -4   53.69    1.48   0
 -10   1  -7   30.72    1.08   0
 -10   4  -8    4.84    0.72   0
  -9  -3  -5    0.47    0.97   0
  -9  -1  -6   88.94    1.48   0
  -9   4  -8   26.08    1.07   0
  -9   8  -9    2.23    0.74   0
  -9  13 -10    1.83    0.82   0
  -8 -13   7   76.03    1.62   0
  -8 -13  11    1.31    0.69   0
  -8  15 -10   13.73    0.85   0
  -7 -12   5    4.82    1.23   0
  -7  -2  -5   29.34    1.31   0
  -7   0  -6    2.38    1.03   0
  -7  10  -9    0.00    0.68   0
  -7  17 -10   34.75    1.07   0
  -7  18 -10    2.12    0.68   0
  -6 -12   7   22.99    1.20   0
  -6 -12  11   -1.02    0.82   0
  -6 -11   4   20.42    1.50   0
  -6  -6  -2   18.23    1.20   0
  -6  -3  -4   27.04    1.14   0
  -6   7  -8    1.76    1.08   0
  -5 -11  12    5.82    0.85   0
  -5  -2  -4  283.09    2.42   0
  -5   0  -5   -0.87    0.64   0
  -5   5  -7    0.82    1.10   0
  -5  14  -9  100.91    1.50   0
  -4  -4  -2    0.44    0.93   0
  -4  21  -9    0.70    0.78   0
  -4  22  -9    6.62    0.89   0
  -3   3  -5  208.97    2.05   0
  -2  -7  14   28.10    0.81   0
  -1  -7   9   33.33    1.97   0
  -1  -6  13    0.10    0.71   0
  -1  -4  16    0.67    0.57   0
  -1   8  -5    1.17    0.71   0
   0  -5   7    0.27    0.82   0
   0  -5  11   -0.77    0.88   0
   0  -3  15    0.21    0.50   0
   0  -2  16    0.69    0.67   0
   0  20  -6  113.88    1.60   0
   0  21  -6   -0.03    1.04   0
   0  22  -6   39.72    1.30   0
   0  23  -6    0.34    0.85   0
   1  -3  11  312.91    2.05   0
   1   0   2 7509.43   17.41   0
   2  -1   8  322.57    2.03   0
   2  -1   9   55.07    1.22   0
   2   1  14   33.94    0.92   0
   2   2  15   40.58    0.98   0
   2   3  16    0.62    0.66   0
   3   2   8   32.00    1.04   0
   3   2   9  278.28    2.51   0
   3   2  10  142.30    1.66   0
   3   4   4   73.16    1.55   0
   3  23  -2    2.58    1.14   0
   4   6   7  130.05    1.73   0
   4   6  11    1.11    0.70   0
   4  20   0    0.44    1.58   0
   4  23   0   62.70    2.61   0
   5  11  10    4.99    0.78   0
   5  14  13    5.13    0.71   0
 -13  -3  -5    1.40    0.87   0
 -12  -5  -4   12.49    1.01   0
 -12   1  -7   10.55    0.96   0
 -11  -9  -1   20.74    1.39   0
 -11   7  -9   10.24    1.05   0
 -10   7  -9   -0.98    0.96   0
  -9 -13   6   -0.60    0.92   0
  -9  12 -10    1.99    0.88   0
  -8 -13   8   19.36    1.09   0
  -8 -13   9   32.04    1.20   0
  -8 -13  10    3.10    0.93   0
  -8  -6  -3    7.55    1.23   0
  -8   8  -9    3.83    1.04   0
  -8  14 -10   10.90    0.76   0
  -7   9  -9   -0.11    0.91   0
  -7  16 -10    0.44    0.94   0
  -6 -12   8   12.24    1.02   0
  -6 -12  10    5.44    0.81   0
  -6  11  -9   36.40    1.19   0
  -5 -11   6    3.91    1.02   0
  -5 -10  14    5.70    0.77   0
  -5   2  -6  281.28    2.16   0
  -5   8  -8    0.84    1.02   0
  -4 -10  12    9.72    0.79   0
  -4  -9  14    1.62    0.75   0
  -4  20  -9    1.29    0.67   0
  -4  23  -9    3.66    0.68   0
  -3  -8  14    2.30    0.67   0
  -3  -7   2   59.29    1.95   0
  -3  14  -8   -2.34    1.01   0
  -2  -8  11  105.36    1.33   0
  -2  -7   4   44.67    1.30   0
  -2  -6  15    1.16    0.70   0
  -2   8  -6    2.72    1.02   0
  -1  -6   5   40.87    1.16   0
  -1  19  -7   89.85    1.46   0
  -1  20  -7   30.04    1.25   0
  -1  21  -7    6.88    1.01   0
  -1  22  -7    7.81    0.96   0
  -1  23  -7    7.18    0.96   0
  -1  24  -7    3.56    0.82   0
   0  -5   8    0.36    0.86   0
   0  -5  10   -0.01    0.96   0
   0  -4  13   10.67    0.79   0
   0  24  -6   12.39    0.98   0
   0  25  -6    1.22    0.81   0
   1  -3   8  164.04    1.62   0
   1  -3  10    0.30    0.93   0
   1  -2  13    0.59    0.62   0
   1  20  -5   19.41    1.37   0
   1  21  -5    2.07    1.01   0
   1  23  -5   -0.71    1.05   0
   2   0  12   29.87    0.90   0
   3   6  15    3.69    0.74   0
   3  10   0    0.22    2.28   0
   3  13  -1   24.68    1.70   0
   3  19  -2  299.05    3.45   0
   3  24  -2    0.33    1.11   0
   4   6   8    5.44    0.95   0
   4   6  10    3.38    0.83   0
   4   7  12    2.69    0.78   0
   4   8  13   -0.18    0.73   0
   4   9  14    0.82    0.62   0
   4  24   0    1.48    1.32   0
   5  11   9    2.79    0.64   0
   5  12  11   16.85    0.82   0
   5  13  12    0.14    0.63   0
 -11 -10   0    0.29    1.21   0
 -11   3  -8    4.45    0.84   0
 -10  -9  -1    0.06    1.16   0
 -10   3  -8   10.02    0.96   0
  -9  -5  -4  489.00    3.19   0
  -8  -3  -5  196.62    2.32   0
  -8  -1  -6    2.84    1.05   0
  -8   4  -8   31.71    1.12   0
  -8  13 -10    5.71    0.67   0
  -7 -12  12   10.37    0.80   0
  -7 -11   3    9.96    1.83   0
  -7  -4  -4   25.50    1.27   0
  -7   2  -7   26.42    1.32   0
  -7   5  -8    3.22    0.98   0
  -7  15 -10   -0.65    0.62   0
  -6 -12   9   59.53    1.31   0
  -6 -11  13    2.61    0.74   0
  -6   3  -7    0.56    1.09   0
  -6   6  -8   26.16    1.19   0
  -6  10  -9   10.07    0.96   0
  -6  18 -10    4.89    0.96   0
  -6  19 -10   16.09    0.85   0
  -5 -11  11   13.66    0.83   0
  -5  13  -9    0.33    0.70   0
  -4 -10   6   68.44    1.49   0
  -4  -1  -4  108.29    1.66   0
  -4   1  -5  104.34    1.47   0
  -4  10  -8   -0.42    1.22   0
  -4  17  -9   11.43    1.07   0
  -3  -9   6  120.61    1.64   0
  -3  -9  11    6.35    0.84   0
  -3  -7  15    1.67    0.76   0
  -2  -8   7    0.10    0.62   0
  -2  -8   8   67.54    1.38   0
  -2  -8   9   17.56    1.06   0
  -2  -8  10   83.65    1.29   0
  -2  -7  13    0.88    0.70   0
  -2  -5  16    0.03    0.54   0
  -1  -6  12   33.08    0.79   0
  -1  -5  14   59.52    0.97   0
  -1  -4  15    0.79    0.75   0
  -1  25  -7    2.79    0.89   0
  -1  26  -7   -0.04    0.83   0
   0  -5   9    1.24    0.70   0
   0  -3   3    0.75    0.88   0
   0  -3  14   -0.32    0.77   0
   0  17  -6   -0.92    1.02   0
   0  26  -6    4.37    0.92   0
   1  -3   9  298.62    1.97   0
   1  -2  12   27.72    0.98   0
   1  -1  14   73.71    1.03   0
   1   0  15   -0.23    0.65   0
   1   1  16   31.78    0.95   0
   1  12  -4  730.78    3.92   0
   1  19  -5   23.29    1.23   0
   1  24  -5   14.93    1.09   0
   1  25  -5    1.42    1.05   0
   2   0   6 2542.70    6.11   0
   2   0  11    0.87    0.86   0
   2   1   4 1258.14    5.42   0
   2   1  13   29.72    1.02   0
   2   4  16    8.02    0.72   0
   2  14  -3   44.18    1.47   0
   3   3   6    6.28    0.87   0
   3   3  11    6.81    0.84   0
   3   4  13    7.75    0.63   0
   3   5  14   36.41    0.94   0
   3  18  -2    3.91    1.74   0
   3  25  -2   27.52    1.41   0
   4   6   9   56.68    1.16   0
   4  19   0  316.30    5.58   0
   5  12  10   -0.10    0.66   0
   5  14   5    0.70    1.26   0
 -13  -5  -4   -0.16    0.86   0
 -12  -9  -1   10.06    1.08   0
 -12   3  -8    8.92    0.95   0
 -11  -8  -2   25.14    1.37   0
 -11  -2  -6    4.70    0.91   0
 -11   6  -9    8.76    1.02   0
 -10 -13   6    0.76    1.10   0
 -10  -8  -2   10.58    1.16   0
 -10  -2  -6   22.47    1.10   0
 -10   6  -9    7.37    0.99   0
  -9 -13   7   32.69    1.38   0
  -9 -13  10    5.00    0.86   0
  -9   3  -8   -0.08    0.92   0
  -9  11 -10    1.40    0.91   0
  -8   1  -7    6.50    1.01   0
  -8   7  -9   50.15    1.32   0
  -7  -8  -1  273.82    3.83   0
  -7   8  -9   53.58    1.24   0
  -7  14 -10    0.29    0.68   0
  -6  16 -10   31.34    1.03   0
  -6  17 -10    1.70    0.72   0
  -5 -11   7   36.67    1.28   0
  -5 -11  10   11.22    0.94   0
  -5 -10  13    1.95    0.81   0
  -5  -9   2  149.37    3.19   0
  -5  12  -9   -1.16    0.96   0
  -4  -8  15   41.37    1.02   0
  -4   3  -6  447.97    2.66   0
  -4   6  -7  177.32    1.75   0
  -4  16  -9    0.19    0.68   0
  -3  -9   7  252.33    2.27   0
  -3  -9  10   -1.46    0.86   0
  -3  -8  13    1.00    0.78   0
  -3   5  -6  483.05    2.75   0
  -3   8  -7    1.35    1.04   0
  -3  13  -8    2.22    0.84   0
  -2  19  -8   57.88    1.33   0
  -2  20  -8    5.97    0.94   0
  -2  21  -8    3.86    0.69   0
  -2  22  -8    8.74    0.77   0
  -2  25  -8   14.22    0.93   0
  -1  -6  11    7.29    0.97   0
  -1  -4   2   11.87    1.19   0
  -1  -3  16    3.33    0.58   0
  -1  17  -7    2.60    1.00   0
   0  -4   5  136.29    1.81   0
   0  -4  12   21.75    0.86   0
   0  -2  15   16.78    0.80   0
   0  -1  16   -0.43    0.76   0
   0   3  -2    0.00    0.72   0
   0   5  -3    0.19    1.09   0
   0  11  -5   -0.23    0.67   0
   0  27  -6    0.29    0.91   0
   1  -2   5 1157.16    4.58   0
   1   6  -2  150.05    2.67   0
   1  18  -5   10.14    1.15   0
   1  26  -5   22.89    1.09   0
   2   2  14   -0.89    0.57   0
   2   3  15   19.81    0.71   0
   2  10  -2  127.24    2.36   0
   3   7  15    1.23    0.69   0
   3  26  -2    6.70    1.10   0
   4   7  11    2.58    0.52   0
   4   8  12    0.18    0.77   0
   4   9  13   34.21    0.97   0
   4  10  14   10.36    0.63   0
   4  25   0    0.27    1.32   0
   5  12   8   -0.87    0.82   0
   5  12   9    1.26    0.70   0
   5  13   6   -0.18    0.88   0
   5  13  11    7.25    0.64   0
 -12 -10   0    4.26    1.30   0
 -12  -8  -2    7.14    1.09   0
 -12  -2  -6   -0.18    0.86   0
 -12   0  -7   -0.69    0.89   0
 -11 -13   6    0.52    1.09   0
 -11  -4  -5    7.43    0.94   0
 -11   0  -7   -0.07    0.89   0
 -10  -4  -5   -0.57    1.10   0
 -10   0  -7   -0.88    0.96   0
  -9 -13   8    3.08    0.95   0
  -9 -13   9   11.38    1.03   0
  -9   6  -9   -0.14    0.99   0
  -9  10 -10    1.05    0.82   0
  -7 -12  11   15.89    0.90   0
  -7  13 -10   20.73    0.81   0
  -6 -11  12   41.86    1.09   0
  -6   9  -9    1.97    0.81   0
  -6  15 -10   -0.08    0.90   0
  -5 -11   8   23.10    1.04   0
  -5 -11   9    3.13    0.74   0
  -5  -4  -3 1048.63    5.04   0
  -5   4  -7  119.20    1.52   0
  -5   7  -8  102.40    1.68   0
  -5  11  -9    4.89    0.86   0
  -5  21 -10   -2.10    0.77   0
  -4 -10   7   48.12    1.28   0
  -4 -10   9   14.16    0.98   0
  -4 -10  10    1.46    0.72   0
  -4  -9  13   35.65    0.91   0
  -4   9  -8    0.05    1.11   0
  -4  15  -9   10.12    0.83   0
  -3  -9   8    0.03    0.92   0
  -3  -9   9    0.72    0.99   0
  -2  -7  12    8.94    0.81   0
  -2  -6  14   10.21    0.65   0
  -2  17  -8    0.44    0.81   0
  -2  18  -8   79.12    1.32   0
  -1  -6   6   98.51    1.47   0
  -1  -5  13    6.13    0.76   0
  -1   7  -5    0.33    0.99   0
  -1  16  -7   22.83    1.21   0
   0  -4  11  275.60    1.94   0
   0  16  -6   60.70    1.39   0
   1  -2  11  294.50    1.96   0
   1  -1  13   41.86    1.05   0
   1   2  16    0.89    0.78   0
   1  17  -5   10.94    1.26   0
   1  27  -5    3.26    0.82   0
   2   0   7   -2.87    0.96   0
   2   0   9   -0.32    0.95   0
   2   0  10  955.73    3.35   0
   2   1  12   29.96    0.94   0
   2   2   3  563.11    4.45   0
   2   5  16   -0.40    0.73   0
   3   3   7   24.46    0.97   0
   3   3   9  109.12    1.50   0
   3   3  10   41.66    1.60   0
   3   4  12   91.52    1.18   0
   3   5  13    0.26    0.76   0
   3   6  14   14.18    0.84   0
   4   7   7  135.30    1.82   0
   4   7  10  110.11    1.41   0
   4  11  14   11.34    0.82   0
   5  13  10    0.73    0.64   0
   5  15  12    0.23    0.58   0
 -12  -7  -3   10.87    1.06   0
 -12  -4  -5    1.92    0.91   0
 -11  -7  -3    3.25    0.90   0
 -11   2  -8    1.77    0.82   0
 -11   5  -9    2.75    0.97   0
 -10  -7  -3   92.51    1.82   0
 -10   2  -8    3.83    0.86   0
 -10   5  -9    3.44    0.86   0
 -10   9 -10    2.07    0.89   0
  -9  -2  -6   16.26    1.04   0
  -8  -5  -4   21.60    1.34   0
  -8   3  -8   22.47    1.02   0
  -8   6  -9   13.08    1.00   0
  -7 -12   6   27.49    1.19   0
  -7 -12  10    8.56    0.86   0
  -7  -9   0   -0.33    1.92   0
  -7  -7  -2    2.65    1.27   0
  -7   4  -8    8.02    1.06   0
  -7  12 -10    8.83    1.02   0
  -6  -5  -3   28.51    1.18   0
  -6  -2  -5   -0.11    0.85   0
  -6   0  -6  425.22    2.72   0
  -6   5  -8  850.84    3.50   0
  -5 -10   4  105.68    2.27   0
  -5 -10  12   37.76    1.06   0
  -5  -9  14   -1.45    0.88   0
  -5  18 -10    3.46    0.85   0
  -5  20 -10   -0.25    0.70   0
  -4 -10   8    0.52    0.95   0
  -4  -8   2    1.46    1.26   0
  -4  14  -9    5.04    0.75   0
  -3  -8   4   21.89    1.15   0
  -3  -8  12    7.01    0.87   0
  -3  -7  14   11.37    0.79   0
  -3  -3  -2  337.96    3.78   0
  -3  20  -9   20.52    1.03   0
  -3  21  -9   -0.79    0.94   0
  -3  22  -9    6.51    0.93   0
  -3  23  -9    2.47    0.95   0
  -2  -5  15    4.30    0.59   0
  -2  -4  16    7.91    0.74   0
  -2   2  -4  124.58    1.84   0
  -2  16  -8    0.01    0.87   0
  -1  -4  14    1.26    0.79   0
  -1  10  -6   20.66    1.21   0
  -1  15  -7   37.40    1.38   0
   0  -3  13   -0.87    0.61   0
   0  -2   2  324.06    3.71   0
   0  -2  14   -0.87    0.77   0
   0  15  -6   -0.13    1.10   0
   1  -2   6   27.76    1.01   0
   1  -2  10    2.66    0.94   0
   1   0  14    2.17    0.61   0
   1   1  15    0.88    0.53   0
   1   4  -1  344.76    5.20   0
   1  16  -5    1.49    1.05   0
   1  28  -5    0.01    0.95   0
   2   0   8  177.88    1.59   0
   2   2  13   12.20    0.91   0
   2   3  14   13.47    0.89   0
   2   4  15   29.64    0.88   0
   2  21  -4   -0.38    0.96   0
   2  22  -4    1.36    1.00   0
   2  23  -4    2.57    1.03   0
   2  24  -4    0.90    1.02   0
   3   3   8   63.25    1.13   0
   3   4   5   76.48    1.50   0
   3   4  11    1.52    0.78   0
   3   8  15    2.60    0.77   0
   3  17  -2    1.31    1.37   0
   3  27  -2   24.61    1.42   0
   4   7   8    4.60    0.89   0
   4   7   9    0.51    0.86   0
   4   8  11    1.93    0.75   0
   4   9  12   16.92    0.82   0
   4  10  13    0.96    0.70   0
   5  13   9   -0.45    0.76   0
 -13  -9  -1    0.10    1.04   0
 -13  -8  -2   -0.13    0.92   0
 -13  -4  -5    0.77    0.72   0
 -12   2  -8    3.10    0.67   0
 -10 -13   7   15.10    1.14   0
 -10 -13   8    1.57    0.92   0
  -9  -9  -1   42.41    1.79   0
  -9  -8  -2    0.43    1.05   0
  -9  -4  -5  100.47    1.68   0
  -9   9 -10    1.42    0.86   0
  -8  10 -10   27.15    0.88   0
  -7 -12   7    8.49    1.10   0
  -7 -12   9    4.96    0.87   0
  -7  -1  -6  153.01    1.72   0
  -7  11 -10    5.79    1.00   0
  -6 -11  11    8.59    0.82   0
  -6   2  -7   58.74    1.39   0
  -6   8  -9    7.43    0.89   0
  -6  13 -10   17.31    0.94   0
  -5  -1  -5    3.07    0.93   0
  -5   1  -6   30.93    1.41   0
  -5  10  -9   42.32    1.15   0
  -5  17 -10    7.55    0.97   0
  -4  -9   4   51.88    1.52   0
  -4  -8  14   -0.51    0.58   0
  -4  -3  -3  566.79    3.92   0
  -4   5  -7   77.38    1.39   0
  -3  -6  15    3.89    0.73   0
  -3   0  -4  179.63    2.10   0
  -3   2  -5  149.43    1.73   0
  -3   7  -7  185.66    1.86   0
  -3  19  -9   11.38    0.79   0
  -2  -7   5  189.62    2.03   0
  -2  -7  11  131.03    1.45   0
  -2  -6  13    6.95    0.91   0
  -2   4  -5  335.78    2.63   0
  -2  15  -8   57.90    1.30   0
  -1  -6   7   25.49    0.81   0
  -1  -6   8   32.75    1.06   0
  -1  -6   9   53.98    1.05   0
  -1  -5  12   19.34    0.92   0
  -1  -3  15    6.33    0.61   0
  -1  -2  16   -0.09    0.62   0
  -1  14  -7    9.98    1.08   0
   0  -4   6  490.44    2.78   0
   0  -4  10  848.53    3.25   0
   0  -1  15    0.31    0.66   0
   0   0  16    3.10    0.61   0
   0   7  -4    2.03    1.12   0
   1  -2   9    7.54    0.98   0
   1  -1  12    5.09    0.81   0
   1   8  -3   30.14    1.36   0
   1  11  -4  405.02    3.05   0
   2   1   5 1639.33    5.54   0
   2   1  11    3.44    0.92   0
   2  19  -4   19.66    1.30   0
   2  25  -4    0.03    0.96   0
   3   5  12   59.03    1.15   0
   3   7  14    9.65    0.74   0
   4  12   2    8.47    1.59   0
   4  12  14    1.36    0.63   0
   4  26   0    8.45    1.60   0
   5  17  12   -0.42    0.59   0
 -13  -7  -3    2.27    0.97   0
 -11  -6  -4   30.53    1.27   0
 -11   4  -9    6.97    0.90   0
 -10   8 -10    2.01    0.75   0
  -9   2  -8    0.88    0.74   0
  -8 -12  11   -0.82    0.77   0
  -8  -2  -6   55.12    1.32   0
  -8   0  -7    0.33    0.90   0
  -8   9 -10   25.06    1.02   0
  -7 -12   8   10.76    0.95   0
  -7  -3  -5  153.18    1.99   0
  -6 -11   5    6.92    1.18   0
  -6 -10  13   -0.75    0.82   0
  -5   3  -7    6.86    1.11   0
  -5   6  -8   56.48    1.18   0
  -5  15 -10   32.69    1.13   0
  -5  16 -10   29.73    0.95   0
  -4  -7  15   71.27    1.21   0
  -4   8  -8    0.66    0.79   0
  -4  12  -9   36.71    1.09   0
  -3  -8  11  318.73    2.10   0
  -3   4  -6   13.35    1.03   0
  -2  -7  10    7.25    1.04   0
  -2  -5  14    7.35    0.85   0
  -2   0  -3    0.63    1.08   0
  -1  -5   4  168.51    2.20   0
  -1   2  -3 4595.72   11.16   0
   0  -4   7  436.63    2.48   0
   0  -4   8    4.79    0.90   0
   0  -4   9    0.97    0.86   0
   0  -3  12   -0.31    0.72   0
   0  14  -6  804.53    3.76   0
   1  -2   7  284.49    2.03   0
   1  -2   8   -0.47    0.79   0
   1  -1   4  829.26    4.35   0
   1   0  13   -0.85    0.84   0
   1   2  15    0.23    0.72   0
   1   3  16    1.27    0.71   0
   1  15  -5  100.87    1.85   0
   2   2  12   11.80    0.81   0
   2   5  15    6.37    0.75   0
   2  18  -4   -0.08    1.17   0
   2  26  -4    4.87    1.04   0
   3   6  13    1.91    0.54   0
   3   9  15   11.65    0.86   0
   3  28  -2   -0.82    1.03   0
   4   8  10    1.49    0.70   0
   4  11  13   -0.77    0.64   0
   5  16  11    0.07    0.54   0
 -13 -10   0   -0.04    1.19   0
 -12  -6  -4    6.41    0.97   0
 -12  -3  -6   14.61    1.11   0
 -12  -1  -7   11.61    0.98   0
 -11  -3  -6   12.52    0.98   0
 -11  -1  -7    0.67    0.86   0
 -11   1  -8   17.94    0.99   0
 -10  -6  -4    0.78    0.94   0
 -10  -1  -7   31.18    1.17   0
 -10   4  -9    1.50    0.93   0
  -9  -7  -3   24.75    1.40   0
  -9   8 -10    0.91    0.61   0
  -8 -12   5   35.14    1.38   0
  -8 -12  10    6.15    0.96   0
  -8   5  -9   57.95    1.41   0
  -7 -11  12    0.99    0.67   0
  -7  -6  -3   23.06    1.27   0
  -7   3  -8  111.15    1.58   0
  -7   6  -9    7.85    1.06   0
  -7  10 -10   19.89    1.06   0
  -7  16 -11    1.35    0.79   0
  -6 -11  10   32.27    1.10   0
  -6   4  -8   19.13    1.19   0
  -6  12 -10    5.97    0.72   0
  -5 -10  11   34.16    1.02   0
  -5  -9  13   -0.65    0.83   0
  -5   9  -9   -0.99    0.98   0
  -4  -9  11    0.11    0.86   0
  -4  -8  13   -0.85    0.84   0
  -4   0  -5   -0.92    1.02   0
  -4   2  -6  393.29    2.53   0
  -4  20 -10   13.40    0.95   0
  -4  21 -10   11.35    1.04   0
  -3  -7  13   56.21    0.97   0
  -3  16  -9    9.34    0.82   0
  -2  -7   6  384.01    2.57   0
  -2  -6   3   18.17    1.24   0
  -2   6  -6  418.19    2.60   0
  -2  14  -8    4.85    1.12   0
  -1  -5  11   34.95    1.16   0
  -1  -4  13    2.33    0.81   0
  -1  -3   1 2372.01   14.08   0
  -1   6  -5   41.73    1.20   0
  -1   9  -6   21.08    1.05   0
  -1  13  -7   13.62    1.21   0
   0  -2  13   25.95    1.01   0
   0   1  16   -0.49    0.82   0
   1  -1  11  261.56    2.22   0
   1   1  14   72.09    1.06   0
   2   1  10  194.26    1.62   0
   2   3  13    3.26    0.81   0
   2   4  14    1.04    0.69   0
   2  17  -4   32.77    1.54   0
   2  27  -4    1.92    0.93   0
   3   4   6   11.74    0.92   0
   3   4   9  451.53    2.60   0
   3   5   4   42.63    1.29   0
   3   8  14    1.43    0.74   0
   3  16  -2  529.80    4.74   0
   4   8   7    3.17    0.92   0
   4   8   8    0.19    0.87   0
   4   8   9  122.34    1.55   0
   4   9  11   -0.16    0.57   0
   5  15   6    2.30    0.96   0
 -13  -6  -4    1.07    0.95   0
 -12   1  -8    1.29    0.88   0
 -10  -3  -6   11.65    1.06   0
 -10   1  -8    7.70    1.02   0
 -10   7 -10    0.13    0.72   0
  -9 -12   4   35.97    1.97   0
  -9  -1  -7   35.14    1.17   0
  -9   4  -9   47.42    1.22   0
  -8  -4  -5  349.76    2.80   0
  -8   8 -10   -1.05    0.86   0
  -8  13 -11    1.92    0.92   0
  -7  15 -11    4.33    1.01   0
  -6 -11   6    0.63    1.13   0
  -6 -11   9   34.67    1.17   0
  -6  -4  -4    9.26    1.01   0
  -6  11 -10   12.03    1.03   0
  -5 -10  10   13.03    0.93   0
  -5  -3  -4   35.82    1.23   0
  -5  14 -10   30.26    0.95   0
  -4   7  -8    4.29    1.03   0
  -4  11  -9    1.62    1.00   0
  -4  18 -10   13.69    0.92   0
  -4  19 -10    0.97    0.70   0
  -3  -8   5    1.62    0.86   0
  -3  -8  10    8.10    0.98   0
  -3  -6  14   18.36    0.81   0
  -3  15  -9   60.70    1.14   0
  -2  -7   7    5.17    0.98   0
  -2  -7   8  586.74    2.87   0
  -2  -7   9   49.98    1.06   0
  -2  -6  12    3.02    0.63   0
  -2   9  -7   69.44    1.28   0
  -1  -3  14    0.42    0.57   0
  -1  -2  15    1.35    0.69   0
  -1  -1  16   31.29    0.89   0
  -1  22  -8   18.85    1.01   0
  -1  23  -8    4.13    0.85   0
   0  -1  14   -0.75    0.71   0
   0   0  15    1.19    0.58   0
   0  13  -6   -0.15    1.12   0
   0  21  -7   -0.36    0.91   0
   0  22  -7   19.00    1.00   0
   0  23  -7    0.72    0.80   0
   1   4  16    0.03    0.69   0
   1  14  -5    2.89    1.13   0
   2   1   6  527.70    2.92   0
   2   1   8  331.98    2.36   0
   2   1   9   52.80    1.08   0
   2   2  11   98.52    1.38   0
   2  28  -4   -0.66    0.96   0
   3   4   7   67.13    1.25   0
   3   4   8  150.48    1.69   0
   3   5  11    1.23    0.59   0
   3   6  12   70.68    1.22   0
   3   7  13   50.64    1.08   0
   3  10  15    0.18    0.62   0
   4   9  10   67.26    1.20   0
   4  12  13   13.10    0.67   0
   4  27   0   72.36    2.91   0
   5  18  11   -0.06    0.62   0
 -11 -11   1    3.18    2.14   0
 -11  -5  -5    0.62    0.94   0
 -11   3  -9   90.32    1.43   0
  -9 -10   0    0.23    1.55   0
  -9  -6  -4    0.60    1.07   0
  -9  -3  -6   11.43    1.02   0
  -9   7 -10    4.90    0.73   0
  -8 -12   9    4.60    0.89   0
  -8  12 -11    2.26    0.90   0
  -7 -11  11   10.89    0.86   0
  -7 -10  13   11.37    0.86   0
  -7   9 -10    4.14    0.73   0
  -6 -11   7   91.60    1.62   0
  -6 -11   8  250.11    2.15   0
  -6 -10  12    6.82    0.79   0
  -6  -1  -6   84.49    1.56   0
  -6  17 -11   -1.08    0.85   0
  -5 -10   5   74.22    1.62   0
  -5  -8  14    5.26    0.73   0
  -5   5  -8    4.62    1.16   0
  -5   8  -9  197.25    1.85   0
  -5  13 -10   -0.99    0.97   0
  -4  -9  10   87.86    1.30   0
  -4  -7  14    1.21    0.71   0
  -4   4  -7  540.98    2.88   0
  -4  17 -10    6.74    1.00   0
  -3  -7  12   41.70    1.09   0
  -3  -5  15    7.88    0.64   0
  -3   6  -7    0.15    0.67   0
  -3   9  -8    0.52    1.00   0
  -2  -5  13    6.37    0.84   0
  -1  -5  10    6.95    0.89   0
  -1  -1  -1    0.91    0.35   0
  -1  19  -8    9.01    1.05   0
  -1  20  -8    4.20    1.00   0
  -1  21  -8   28.76    0.96   0
  -1  24  -8    4.45    0.92   0
  -1  25  -8   -0.51    0.92   0
   0   9  -5   -0.29    0.75   0
   0  19  -7   -0.58    0.91   0
   0  24  -7    0.74    0.85   0
   0  25  -7    0.70    0.89   0
   0  26  -7   59.92    1.48   0
   1  -1  10   26.09    0.99   0
   1   0  12   40.16    0.88   0
   1   1  13   39.25    1.07   0
   1   3  15    6.32    0.76   0
   1  10  -4   18.88    1.18   0
   2   1   7  780.59    3.30   0
   2   3  12   33.18    0.95   0
   2   5  14    5.96    0.81   0
   2   6  15    0.04    0.51   0
   2  12  -3  116.07    1.99   0
   2  16  -4   94.69    1.97   0
   3   7   2   51.29    1.90   0
   3   9  14   -0.58    0.73   0
   3  12  -1  311.50    4.57   0
   4  10  11    0.15    0.72   0
   4  13  13   32.29    0.98   0
   5  19  11    1.58    0.65   0
 -12  -5  -5    6.27    0.97   0
 -10  -5  -5    1.03    0.95   0
 -10   3  -9    1.77    0.71   0
 -10   6 -10    0.22    0.93   0
  -9 -12  10    3.17    0.80   0
  -8 -12   6    5.37    1.00   0
  -8 -12   7   17.44    1.22   0
  -8 -12   8   58.28    1.30   0
  -8   4  -9    3.49    1.12   0
  -8   7 -10    6.82    0.91   0
  -7  -5  -4    1.64    1.07   0
  -7  -2  -6   27.39    1.26   0
  -7   5  -9    1.44    0.66   0
  -7  13 -11   31.27    1.02   0
  -6   6  -9   88.75    1.39   0
  -6  10 -10   75.08    1.20   0
  -6  16 -11    0.74    0.93   0
  -5 -10   9   35.92    1.08   0
  -5  -9  12    2.87    0.73   0
  -5   0  -6  103.39    1.54   0
  -5  12 -10    1.28    0.96   0
  -4  -9   5  931.37    4.44   0
  -4  -9   9   16.52    1.02   0
  -4  -8  12    0.49    0.75   0
  -4  -6  15    5.96    0.68   0
  -4  -2  -4   46.84    1.32   0
  -4  16 -10   -0.72    0.67   0
  -3  -8   6   29.83    1.09   0
  -3  -8   8   61.82    1.35   0
  -3  -6   1  368.93    6.18   0
  -3  -2  -3  417.94    3.76   0
  -3  13  -9   23.65    1.04   0
  -2  -6  11   28.71    0.97   0
  -2  -4  14    0.09    0.78   0
  -2  -3  15   20.18    0.93   0
  -2  -2  16    3.07    0.82   0
  -2  19  -9   -0.16    0.81   0
  -2  20  -9   -2.07    0.99   0
  -2  21  -9   22.26    1.12   0
  -2  22  -9   14.32    0.81   0
  -2  23  -9   23.74    1.08   0
  -2  24  -9    1.37    0.95   0
  -1  -5   5   28.22    1.06   0
  -1   0  16   11.45    0.91   0
   0  -3  10   -0.06    0.69   0
   0  -2  12   18.42    0.72   0
   0   2  16    0.89    0.69   0
   0  12  -6  119.12    2.22   0
   0  18  -7   71.11    1.45   0
   1  -1   5   50.34    1.28   0
   1  -1   9    2.38    0.94   0
   1   2  14    1.86    0.60   0
   1   5  16   19.79    0.88   0
   1  21  -6    0.03    1.08   0
   1  22  -6   37.50    1.26   0
   1  23  -6   20.12    1.07   0
   1  24  -6   -0.25    0.84   0
   2   2   4  108.42    1.76   0
   2   2  10   38.85    1.15   0
   2   4  13   16.99    0.89   0
   3   6  11   29.19    0.97   0
   3   8  13   -0.73    0.73   0
   4   9   9   10.58    0.87   0
   4  12  12    2.79    0.74   0
   4  14  13    1.67    0.72   0
 -13  -5  -5    0.18    0.71   0
 -12  -2  -7   -0.06    0.73   0
 -12   0  -8   13.79    0.95   0
 -11  -2  -7   -0.44    0.88   0
 -11   0  -8    2.19    0.94   0
  -9   3  -9   50.03    1.21   0
  -9   6 -10   -0.36    0.95   0
  -8  -8  -2   39.25    1.81   0
  -8  -1  -7    6.20    1.01   0
  -8   1  -8   73.67    1.33   0
  -8  11 -11    1.96    0.69   0
  -7 -11   4    5.61    1.46   0
  -7 -11  10    8.13    0.85   0
  -7   2  -8    9.17    0.82   0
  -7   8 -10   33.11    0.98   0
  -7  12 -11   18.94    0.97   0
  -6  -9   1  143.88    6.05   0
  -6  -9  13   21.84    0.97   0
  -6  15 -11   11.20    1.01   0
  -5 -10   6  288.59    2.50   0
  -5 -10   7   20.06    1.38   0
  -5 -10   8   57.68    1.29   0
  -5   2  -7  102.21    1.46   0
  -5  19 -11    3.63    0.87   0
  -4  -9   6  164.49    2.11   0
  -4  -9   8    1.08    0.98   0
  -4  15 -10   21.88    0.91   0
  -3  -8   7    0.29    0.97   0
  -3  -6  13    4.47    0.74   0
  -3   1  -5  111.76    1.66   0
  -3   3  -6    6.62    0.99   0
  -2   3  -5  254.80    2.20   0
  -2   8  -7    0.60    0.76   0
  -1  -5   6    2.62    0.92   0
  -1  -5   8  222.93    1.83   0
  -1  -3  13   88.53    1.16   0
  -1  -2  14    0.59    0.83   0
  -1  -1  15    1.96    0.72   0
  -1   8  -6    7.93    0.74   0
   0  -3   9    0.11    0.99   0
   0  -1  13   -0.45    0.64   0
   0   0  14  131.77    1.39   0
   0   1  15   -0.01    0.56   0
   0   4  -3  507.18    4.01   0
   0   6  -4   35.24    1.33   0
   0  17  -7    0.21    1.01   0
   1  -1   6   63.80    1.27   0
   1  -1   8 1181.85    3.79   0
   1   0   3    1.30    1.02   0
   1   0  11    0.21    0.95   0
   1   4  15    0.91    0.75   0
   1  13  -5  257.87    2.55   0
   1  19  -6    7.61    1.10   0
   1  20  -6   45.25    1.37   0
   1  25  -6    2.17    0.96   0
   1  26  -6   10.51    0.94   0
   2   7  15    6.79    0.64   0
   2   9  -2   53.20    1.75   0
   3   5   5    0.11    0.89   0
   3   7  12   31.28    0.92   0
   3  10  14    6.41    0.77   0
   3  15  -2   30.11    1.73   0
   4   9   7  196.80    2.22   0
   4   9   8    1.45    0.82   0
   4  10  10    0.01    0.66   0
   4  11  11    3.14    0.77   0
   4  28   0   13.40    1.71   0
   5  25   4    1.30    1.86   0
 -11  -4  -6   16.54    1.14   0
 -11   2  -9   24.10    1.12   0
 -10  -2  -7   14.24    1.06   0
 -10   0  -8  176.44    1.93   0
  -9 -12   9    1.38    0.80   0
  -9   9 -11   20.55    1.05   0
  -8 -11  11    1.26    0.84   0
  -8  -7  -3  195.54    2.47   0
  -8  -3  -6   33.23    1.23   0
  -8  10 -11    3.28    0.84   0
  -7 -10  12    5.35    0.86   0
  -7   4  -9    7.56    0.89   0
  -6 -10   3  113.80    2.54   0
  -6  -3  -5  696.38    3.64   0
  -6   9 -10   11.09    0.84   0
  -6  14 -11    2.53    0.91   0
  -5  -9  11    3.94    0.89   0
  -5  -2  -5   28.80    1.12   0
  -5   4  -8   30.33    1.22   0
  -5  11 -10   10.81    1.04   0
  -5  17 -11   22.79    1.06   0
  -5  18 -11   -0.42    0.99   0
  -4  -9   7  255.70    2.25   0
  -4  -7  13   21.43    0.86   0
  -4   1  -6  492.09    2.91   0
  -4   9  -9   13.45    1.17   0
  -4  14 -10    4.14    1.02   0
  -3  -7  11  100.68    1.23   0
  -3  -5  14   39.49    1.03   0
  -3  -4  15    1.89    0.77   0
  -3   5  -7  295.62    2.19   0
  -3   8  -8   67.46    1.50   0
  -3  20 -10    5.13    0.94   0
  -3  21 -10   12.72    1.07   0
  -3  22 -10    3.63    1.02   0
  -2  -6  10  235.99    2.01   0
  -2  -5  12    7.75    0.79   0
  -2   1  -4 1367.57    5.67   0
  -2   5  -6  190.79    1.89   0
  -2  11  -8    0.87    1.16   0
  -1  -5   7   67.61    1.25   0
  -1  -4  11   40.22    0.95   0
  -1  16  -8   19.64    1.10   0
   0  -3   8   -0.02    0.77   0
   0  -2  11  307.16    2.04   0
   0  16  -7    7.37    1.03   0
   1  -1   7  179.90    1.73   0
   1   1  12    7.88    0.81   0
   1   3  14   -0.30    0.77   0
   1   7  -3   92.99    2.05   0
   1  18  -6    0.93    1.02   0
   1  27  -6    0.46    0.80   0
   2   2   9   85.15    1.50   0
   2   3  11   51.02    1.11   0
   2   5  13    6.65    0.81   0
   2   6  14   10.86    0.81   0
   2  15  -4    0.80    1.12   0
   3   5   6  410.26    2.73   0
   3   9  13    8.87    0.82   0
   3  21  -3   38.22    1.54   0
   3  22  -3    2.72    1.27   0
   3  23  -3    1.89    1.26   0
   3  24  -3   70.84    1.84   0
   4  13  12    1.64    0.67   0
   5  17   6   -0.03    0.73   0
   5  20   4    0.17    0.97   0
 -12  -4  -6    0.13    0.87   0
 -10 -12   4    0.06    1.25   0
 -10  -4  -6   17.11    1.01   0
 -10   2  -9    9.82    1.01   0
  -9 -12   5   46.16    1.57   0
  -9 -12   8    2.59    0.94   0
  -9  -2  -7   -0.05    0.87   0
  -9   0  -8   66.26    1.39   0
  -9   5 -10    2.10    0.82   0
  -8  -6  -4   45.45    1.61   0
  -8   3  -9  230.34    2.06   0
  -8   6 -10   61.27    1.20   0
  -7 -11   9    2.98    0.88   0
  -7  -4  -5    6.85    1.12   0
  -7   7 -10   24.42    0.94   0
  -7  11 -11   11.33    0.94   0
  -6  -8  14    7.97    0.65   0
  -6   5  -9   23.59    1.15   0
  -6  13 -11    6.79    0.98   0
  -5  -7  14    0.65    0.85   0
  -5  16 -11    1.67    0.82   0
  -4  -6  14    8.76    0.78   0
  -4  -5  15   -0.03    0.87   0
  -4   3  -7   18.60    1.13   0
  -4  13 -10    2.30    1.43   0
  -3  -7   3   77.27    1.83   0
  -3  19 -10    3.88    0.74   0
  -2  -6   4  134.87    1.90   0
  -2  -4  13   18.79    0.96   0
  -2  -1  16    2.35    0.84   0
  -2  16  -9   -0.11    0.97   0
  -1  -4   3  175.25    2.57   0
  -1  -3  12   10.69    0.85   0
  -1   1  16   37.64    1.06   0
  -1   5  -5   27.98    1.13   0
  -1  15  -8  113.78    1.62   0
   0  -3   6   -0.20    0.78   0
   0  -3   7    1.69    0.84   0
   0  -1  12    0.32    0.78   0
   0   2  15   20.00    0.87   0
   0   8  -5   81.62    1.69   0
   0  11  -6    0.10    1.00   0
   1   0  10   31.33    1.12   0
   1   2  13   -1.05    0.64   0
   1  17  -6  130.10    1.83   0
   2   2   5 1474.30    5.37   0
   2   2   8   -0.51    0.85   0
   2   4  12    0.47    0.51   0
   2   7  -1  795.37    7.56   0
   2   8  15   23.54    0.76   0
   3   5   7  220.59    1.91   0
   3   6  10   12.53    0.75   0
   3   7  11   82.80    1.26   0
   3   8  12    3.77    0.87   0
   3  20  -3   22.41    1.50   0
   3  25  -3    3.81    1.12   0
   4  10   9   10.97    0.83   0
   4  11  10   62.95    1.21   0
   4  12  11    1.80    0.73   0
   4  14  12    2.39    0.69   0
   4  16  13    3.79    0.63   0
   5  18   8    0.43    0.63   0
   5  19   9    0.29    0.57   0
   5  20   9   -0.07    0.82   0
 -12  -8  -3   10.52    1.12   0
 -11  -8  -3   26.73    1.31   0
 -10 -12   9    3.16    0.91   0
  -9 -12   6    5.91    1.11   0
  -9 -12   7    4.81    1.07   0
  -8  -9  -1    2.15    1.74   0
  -8   9 -11    0.59    0.89   0
  -7  -1  -7   39.45    1.31   0
  -7   1  -8   13.15    1.06   0
  -6 -10  10   71.10    1.25   0
  -6   8 -10    4.95    0.81   0
  -6  12 -11   -1.33    0.87   0
  -5  -6  15    0.22    0.57   0
  -5  10 -10   13.46    0.80   0
  -5  15 -11    4.72    0.97   0
  -4  -1  -5  101.60    1.61   0
  -3  -7  10    8.70    0.92   0
  -3  -6  12   82.29    1.25   0
  -3  -1  -4 1284.37    5.26   0
  -3  11  -9    0.45    1.07   0
  -3  17 -10    2.14    0.99   0
  -2  -6   9   69.26    1.17   0
  -2  -3  14   12.81    0.82   0
  -2   7  -7    4.22    1.01   0
  -1  -4  10  187.18    1.74   0
  -1  -2  13   -0.19    0.84   0
  -1   0  15    1.33    0.75   0
  -1   7  -6   80.84    1.45   0
  -1  10  -7  328.70    2.44   0
   0  -2  10  335.17    2.09   0
   0   0  13    0.12    0.82   0
   0  15  -7    0.59    1.20   0
   1   9  -4  127.28    1.93   0
   1  12  -5   36.73    1.29   0
   2   2   6  564.97    3.06   0
   2   2   7  689.80    3.16   0
   2   3   3 1030.69    5.57   0
   2   7  14   28.80    0.91   0
   2   9  15   10.63    0.86   0
   2  11  -3    7.86    1.20   0
   2  21  -5    9.64    1.23   0
   2  22  -5    7.02    1.09   0
   2  23  -5   34.50    1.32   0
   2  24  -5    5.20    0.89   0
   3  10  13    1.09    0.77   0
   3  12  14   14.05    0.82   0
   3  19  -3  293.39    3.32   0
   3  26  -3    6.01    1.14   0
   5  19   5    0.05    0.89   0
   5  22   9   -0.09    1.02   0
   5  23   4    0.11    1.35   0
 -12 -12   4    0.07    1.29   0
 -12  -9  -2   13.43    1.20   0
 -12  -7  -4    0.95    0.89   0
 -12  -1  -8    2.42    0.91   0
 -11  -9  -2   30.58    1.44   0
 -11  -7  -4    0.64    0.87   0
 -11   1  -9    0.47    0.84   0
 -10  -8  -3  163.42    2.38   0
 -10   4 -10   26.02    0.94   0
  -9  -4  -6   26.10    1.12   0
  -8 -11  10   14.90    0.94   0
  -8 -10  12   35.94    1.08   0
  -8   0  -8   71.90    1.32   0
  -8   5 -10   30.19    1.12   0
  -7 -11   5   16.67    1.26   0
  -7 -11   8   11.81    1.00   0
  -7 -10  11   35.38    1.09   0
  -7  -9  13    9.79    0.80   0
  -7   6 -10    2.29    1.05   0
  -7  10 -11   34.68    0.95   0
  -6  -2  -6   88.95    1.57   0
  -5  -9  10    1.20    0.76   0
  -5  -8  12   17.78    0.93   0
  -5  -6  -2  965.63    5.91   0
  -5   1  -7    2.57    1.15   0
  -5   6  -9   -0.25    0.75   0
  -5  14 -11   13.52    0.96   0
  -4  -8  10    2.27    0.76   0
  -4  -7  12    5.04    0.82   0
  -4   5  -8  207.97    1.86   0
  -4   8  -9  168.25    1.69   0
  -4  19 -11    4.11    0.90   0
  -4  20 -11    7.89    0.99   0
  -3  -5  13    0.67    0.83   0
  -3  -2  16    1.61    0.75   0
  -3  16 -10    7.88    1.02   0
  -2  -6   8    0.06    0.94   0
  -2  -5  11   30.87    0.90   0
  -1  -1  14   73.52    1.05   0
  -1  14  -8    4.22    1.14   0
   0  -2   3 5021.17   12.41   0
   0   4  16    1.37    0.58   0
   1   1  11  275.76    1.99   0
   1   4  14    1.38    0.75   0
   1   5  -2 1169.39    6.87   0
   1  16  -6   46.34    1.55   0
   2   4  11   72.19    1.24   0
   2   5  12    5.48    0.79   0
   2   6  13    7.30    0.87   0
   2  14  -4  122.43    2.07   0
   2  20  -5  163.45    2.54   0
   2  25  -5    5.58    0.96   0
   2  26  -5   15.88    1.22   0
   3   9  12   -0.11    0.76   0
   3  27  -3    2.65    1.09   0
   4  13  11    0.01    0.61   0
   4  15  12    0.66    0.69   0
   5  19   7    0.15    0.66   0
 -13  -8  -3    1.48    0.93   0
 -13  -7  -4    0.89    0.94   0
 -12  -6  -5    3.80    1.00   0
 -12  -3  -7   24.94    1.09   0
 -11 -12   4    9.34    1.59   0
 -11  -6  -5    8.95    1.07   0
 -11  -3  -7    4.75    0.89   0
 -10 -12   8    1.39    0.85   0
 -10  -9  -2    0.34    1.29   0
 -10  -7  -4   17.32    1.15   0
 -10  -3  -7    1.16    1.04   0
 -10  -1  -8    4.32    0.73   0
 -10   1  -9    0.25    0.89   0
  -9   4 -10    3.77    0.94   0
  -8  -2  -7  146.81    1.74   0
  -8   8 -11   -0.74    0.95   0
  -7 -11   6  121.55    1.89   0
  -7 -11   7  117.86    1.66   0
  -7  -3  -6    6.55    1.11   0
  -7   3  -9   16.57    0.85   0
  -7   9 -11    8.33    0.95   0
  -6 -10   9   10.04    0.88   0
  -6  -6  -3   18.25    1.26   0
  -6   4  -9   95.48    1.47   0
  -6  11 -11    8.37    1.02   0
  -5  -9   3  144.44    2.53   0
  -5  -5  -3   93.48    1.78   0
  -5  -1  -6   46.43    1.24   0
  -5   3  -8    6.17    1.08   0
  -5   9 -10    2.17    0.73   0
  -5  13 -11   11.04    0.96   0
  -4  -8   3  220.93    2.83   0
  -4  -6  13   31.16    1.09   0
  -4  11 -10   96.73    1.41   0
  -4  17 -11    2.78    0.88   0
  -4  18 -11    2.43    0.92   0
  -3  -7   9    1.23    0.97   0
  -3  -4  14   13.64    0.85   0
  -3  -3  15   -0.43    0.57   0
  -3   2  -6    3.78    0.97   0
  -3  10  -9   88.31    1.48   0
  -3  15 -10   21.33    1.09   0
  -2  -6   5  215.91    2.15   0
  -2  -6   6  391.34    2.59   0
  -2  -6   7  132.10    1.53   0
  -2  -4  12   -0.93    0.79   0
  -2  -2  -2  113.49    2.42   0
  -2   0  16    2.47    0.72   0
  -2   4  -6  640.73    3.32   0
  -1  -4   9  106.47    1.46   0
  -1  -3  11  324.81    2.10   0
  -1   2  16   -0.46    0.73   0
  -1  22  -9    1.70    0.82   0
  -1  23  -9    3.62    0.91   0
  -1  24  -9   16.57    1.01   0
   0  -2   9  305.50    2.10   0
   0  -1  11    1.30    0.99   0
   0  10  -6  243.58    2.15   0
   1   0   4 6910.74   12.52   0
   1   2  12   26.25    0.81   0
   1   3  13   79.57    1.14   0
   1   6  15    0.11    0.77   0
   2   3   9  110.99    1.55   0
   2   8  14    5.82    0.78   0
   2  10  15   -0.72    0.79   0
   2  19  -5    1.45    1.01   0
   2  27  -5    7.38    1.14   0
   3   6   8  111.83    1.55   0
   3   7  10    6.05    0.82   0
   3   8  11  266.27    2.02   0
   3  11  13   31.50    1.00   0
   3  13  14    2.31    0.75   0
   3  14  -2   54.02    1.98   0
   3  18  -3   69.55    2.05   0
   3  28  -3    1.24    1.23   0
   4  14  11    1.61    0.74   0
   5  21   8    0.00    0.79   0
   5  25   5    0.01    1.78   0
 -13  -9  -2    5.77    1.12   0
 -10 -12   5    1.82    1.11   0
 -10 -12   7   57.89    1.55   0
 -10  -6  -5    8.50    1.14   0
 -10   3 -10    1.65    0.82   0
  -9   1  -9   26.24    1.05   0
  -8 -11   3   61.47    2.38   0
  -8 -11   9   -0.57    0.81   0
  -7  13 -12    5.21    0.86   0
  -6  -9  11    1.68    0.82   0
  -6  -7  -2  204.60    2.92   0
  -6  -7  14    0.81    0.76   0
  -6  -5  -4   53.35    1.53   0
  -6  10 -11   12.61    0.95   0
  -5  -9   9    1.03    0.84   0
  -5  -7  13    1.57    0.58   0
  -5  -6  14   24.65    0.95   0
  -5  -4  -4   78.27    1.67   0
  -4  -8   9  165.83    1.74   0
  -4  -5  14    0.47    0.71   0
  -4  -4  15    0.50    0.74   0
  -4   2  -7   15.19    1.03   0
  -4   7  -9    1.20    1.20   0
  -4  16 -11    2.37    0.85   0
  -3  -6  11   36.06    1.04   0
  -3   4  -7   77.47    1.24   0
  -2  -5   2 2355.37   10.09   0
  -2  -5  10  245.30    1.90   0
  -2  -2  14   -0.04    0.80   0
  -2  -1  15    2.46    0.73   0
  -2   2  -5 1610.72    5.36   0
  -2  13  -9    1.52    1.00   0
  -2  21 -10   35.72    1.13   0
  -2  22 -10    2.90    0.88   0
  -1  -2  12   30.37    1.00   0
  -1   1  15    2.64    0.69   0
  -1   9  -7   25.99    1.15   0
   0   0  12   13.89    1.05   0
   0   1  13   -0.65    0.87   0
   0   2  14   -1.16    0.75   0
   0   5  16    0.16    0.69   0
   0  20  -8  153.48    1.84   0
   0  21  -8   -0.25    0.95   0
   0  22  -8   -2.34    0.95   0
   0  23  -8   -0.09    0.88   0
   0  24  -8    3.37    0.96   0
   0  25  -8    1.06    1.01   0
   1   0   8  131.34    1.40   0
   1   1  10   24.42    1.05   0
   1  11  -5    1.35    0.95   0
   1  15  -6   68.85    1.59   0
   2   7  13    0.35    0.79   0
   2  18  -5  103.96    1.88   0
   3  14  14    1.54    0.75   0
   4  11   4    2.02    0.88   0
   4  13  10   11.51    0.88   0
   4  17  12    0.29    0.76   0
 -12  -5  -6   27.92    1.26   0
 -11 -12   7    3.69    1.05   0
 -11  -5  -6   36.86    1.31   0
 -10 -12   6   17.71    1.18   0
  -9  -3  -7  138.97    1.79   0
  -9   6 -11    1.64    0.83   0
  -8  -4  -6   13.25    1.04   0
  -7 -10  10   17.01    0.93   0
  -7  -9  12    4.75    0.82   0
  -7   8 -11   76.62    1.30   0
  -6 -10   4   33.68    1.53   0
  -6 -10   8    2.41    0.82   0
  -6  15 -12   18.87    1.03   0
  -5  -8  11    5.91    1.05   0
  -5   5  -9   17.35    0.90   0
  -5   8 -10   11.71    0.72   0
  -5  12 -11   34.24    1.14   0
  -4  -7  11    3.43    0.72   0
  -4  -5  -2  649.16    4.92   0
  -4  -4  -3   11.52    1.00   0
  -4   0  -6  400.49    2.59   0
  -4   4  -8  228.56    1.98   0
  -4  10 -10   -1.52    0.82   0
  -4  15 -11    8.04    0.93   0
  -3  -7   4 1147.37    5.18   0
  -3  -7   8   41.14    1.14   0
  -3  -5  12   72.27    1.23   0
  -3   0  -5    0.26    0.83   0
  -3   6  -8  151.72    1.80   0
  -3   9  -9    0.91    1.16   0
  -2  -1  -3    5.18    1.14   0
  -2   6  -7  137.07    1.51   0
  -2  19 -10    1.36    0.89   0
  -1  -4   4  505.70    3.55   0
  -1  -4   8  127.01    1.41   0
  -1  -1  13   41.49    1.05   0
  -1   0  14    3.67    0.77   0
  -1   1  -3 3898.35   11.11   0
  -1   3  16    1.51    0.86   0
  -1  18  -9    4.21    0.93   0
  -1  19  -9   78.57    1.27   0
   0  -2   8    3.23    0.78   0
   0   5  -4   -0.51    1.11   0
   0   7  -5    0.43    0.92   0
   0  13  -7    0.68    1.19   0
   0  19  -8   -1.37    1.13   0
   1   0   5    0.36    0.88   0
   1   0   6   58.49    1.24   0
   1   0   7   -0.74    0.92   0
   1   1   2  155.86    2.73   0
   1   2  11  292.84    2.02   0
   1   4  13    2.40    0.91   0
   1   5  14   58.44    0.97   0
   1   7  15    0.08    0.74   0
   2   4  10  103.16    1.41   0
   2   5  11   32.00    1.05   0
   2   6  12    2.20    0.80   0
   2   9  14   38.25    0.97   0
   2  11  15    3.17    0.67   0
   2  13  -4    0.25    1.14   0
   3   6   6  579.17    3.35   0
   3   7   9    0.07    0.88   0
   3   9  11    6.22    0.79   0
   3  12  13    8.28    0.73   0
   4  12   3   -0.18    1.20   0
   4  12   9   22.52    0.89   0
   4  15  11    6.55    0.74   0
   4  18  12    0.90    0.75   0
   5  21   6    0.00    0.78   0
   5  23   5   -0.11    1.06   0
   5  23   6    3.58    1.33   0
   5  23   7    0.01    1.07   0
   5  24   6   -0.07    1.43   0
 -12 -10  -1    1.16    1.15   0
 -12  -2  -8    2.56    0.77   0
 -11 -12   5   -0.33    1.13   0
 -11 -12   6    0.45    1.08   0
 -11 -10  -1    1.96    1.28   0
 -11  -2  -8    1.08    0.82   0
 -11   0  -9    3.84    0.96   0
  -9 -11   2   10.46    1.98   0
  -9  -8  -3    7.20    1.19   0
  -9  -7  -4   16.71    1.11   0
  -9   3 -10   -0.39    0.70   0
  -8 -11   8    2.57    1.02   0
  -7   0  -8   37.84    1.24   0
  -7   2  -9   10.47    0.98   0
  -7  12 -12   16.18    1.06   0
  -6 -10   7   -0.07    0.96   0
  -6  -8  12   -0.09    0.84   0
  -6   1  -8   96.84    1.70   0
  -6   3  -9   11.40    0.99   0
  -6   9 -11   -0.34    0.85   0
  -6  14 -12    5.41    1.00   0
  -5  -9   8   20.45    1.07   0
  -4  -8   8    0.63    0.95   0
  -4  -3  -4  211.79    2.36   0
  -3  -7   7  168.26    1.76   0
  -3  -6  10    1.98    1.26   0
  -3  -4  13    9.45    0.93   0
  -3  -2  15    0.22    0.64   0
  -3  13 -10   18.52    0.89   0
  -3  21 -11    0.42    0.83   0
  -2  -4  11   82.23    1.29   0
  -2   1  16    0.10    0.73   0
  -2  18 -10    6.30    1.03   0
  -1  -3  10    0.60    0.86   0
  -1  12  -8   20.45    1.00   0
  -1  17  -9    2.81    1.01   0
   0  -2   4 2201.59    7.10   0
   0  -1  10   -0.11    0.92   0
   0   2  -2  327.24    3.93   0
   0   4  15   35.13    0.85   0
   0   6  16   11.02    0.76   0
   0  18  -8   12.93    1.10   0
   1   3  12    7.28    0.81   0
   1  14  -6   32.29    1.40   0
   1  21  -7    7.70    1.09   0
   1  22  -7    8.57    0.99   0
   1  23  -7    6.97    0.99   0
   1  24  -7    2.07    0.94   0
   1  25  -7    2.26    0.95   0
   1  26  -7    0.41    1.07   0
   2   3   4  202.16    2.35   0
   2   3   7  191.53    1.80   0
   2  17  -5  292.43    2.85   0
   3   8  10    4.27    0.65   0
   3  17  -3  128.22    2.45   0
   4  11   5   89.51    1.78   0
   4  14  10    1.21    0.74   0
   4  16  11    0.79    0.72   0
   4  21  -1   -0.02    1.41   0
   4  25  -1    1.29    1.43   0
 -10  -2  -8    2.08    0.94   0
 -10   0  -9    2.95    0.96   0
  -9 -11   9   -0.48    0.93   0
  -8  -1  -8   59.88    1.41   0
  -8   1  -9   10.71    1.07   0
  -8   6 -11   -0.27    0.90   0
  -8  10 -12   39.16    1.02   0
  -7  -8  13    6.07    0.66   0
  -7  -7  -3  203.48    2.54   0
  -7  -6  -4  248.30    2.53   0
  -7  -2  -7   23.88    1.32   0
  -7  11 -12   -0.24    0.85   0
  -6 -10   6    2.77    1.13   0
  -6  -9  10    6.09    1.03   0
  -6  13 -12   -1.59    0.84   0
  -5  -7  -1  302.73    4.44   0
  -5  -3  -5  240.44    2.21   0
  -5   0  -7   68.90    1.52   0
  -5   2  -8   62.56    1.45   0
  -5   7 -10    1.06    0.93   0
  -5  11 -11   15.02    0.83   0
  -5  17 -12    0.64    0.69   0
  -4  -6  12    1.68    0.82   0
  -4  14 -11    1.17    0.72   0
  -3  -7   5    1.11    0.88   0
  -3  -7   6  101.65    1.50   0
  -3  20 -11    1.95    0.77   0
  -2  -5   9  185.90    1.63   0
  -2   0  15   -0.29    0.72   0
  -1  -4   5    0.04    0.60   0
  -1  -4   6    1.58    0.83   0
  -1   2  15    0.86    0.69   0
   0  -2   5 2370.95    6.59   0
   0  -2   6  827.94    3.71   0
   0  -2   7   55.55    1.04   0
   0   0  11   -0.35    0.96   0
   0   3  14   -0.00    0.60   0
   0   9  -6    0.33    0.93   0
   0  17  -8    0.69    1.01   0
   1   1   9    1.90    0.73   0
   1   6  14   -0.50    0.75   0
   1   8  -4    7.15    1.01   0
   1   8  15    0.36    0.78   0
   1  20  -7   18.21    1.39   0
   2   3   5  225.33    2.19   0
   2   3   6  298.77    2.30   0
   2   4   9   55.98    1.31   0
   2   8  13    8.94    0.75   0
   2  10  -3  231.50    2.81   0
   2  10  14    3.35    0.77   0
   3   7   8   30.23    1.11   0
   3  11  12   23.07    0.76   0
   3  13  13    6.18    0.62   0
 -13 -10  -1    8.77    1.33   0
 -12  -4  -7    3.17    0.95   0
 -11  -4  -7    3.64    0.94   0
  -9 -10  11    7.42    0.89   0
  -9   0  -9   -0.74    0.95   0
  -8 -11   7    4.20    1.18   0
  -8  -9  12   -1.06    0.86   0
  -8  -3  -7  327.26    2.45   0
  -8   3 -10    0.07    0.91   0
  -8   9 -12    0.51    0.88   0
  -7 -10   9   -0.34    0.81   0
  -7  -9  11    8.31    0.88   0
  -6  -6  14   -0.91    0.87   0
  -6   5 -10    7.38    0.95   0
  -6   8 -11   13.82    0.98   0
  -5  -9   4   14.26    1.07   0
  -5  -8  10    3.14    0.86   0
  -5  -6  13    0.78    0.84   0
  -5  -5  14    1.69    0.80   0
  -5  -4  15   -0.14    0.82   0
  -5   4  -9    0.71    1.19   0
  -5  10 -11   34.27    1.12   0
  -4  -8   4    6.39    0.93   0
  -4  -5  13   -0.20    0.60   0
  -4  13 -11    1.89    1.00   0
  -3   0  16   -1.21    0.89   0
  -2   0  -4 1736.52    6.29   0
  -2   2  16    3.69    0.81   0
  -1  -3   9  316.74    2.30   0
  -1  -2  11  285.11    1.91   0
  -1  -1  12    4.56    0.85   0
  -1   0  13   -0.88    0.86   0
  -1   4  16    0.39    0.59   0
  -1   8  -7   37.47    1.23   0
  -1  11  -8   -0.78    1.14   0
   0  -1   9    0.78    1.00   0
   0   1  12    0.21    0.61   0
   0   5  15   -0.22    0.69   0
   0  16  -8  157.09    1.83   0
   1   2  10    1.17    0.96   0
   1  10  -5  651.04    3.62   0
   1  13  -6   33.96    1.32   0
   1  18  -7    1.22    1.08   0
   2  16  -5    2.58    1.16   0
   3   9  10    0.22    0.79   0
   3  10  11   -1.78    0.95   0
   3  12  12   11.68    0.86   0
   3  14  13   -1.22    0.77   0
   4  26  -1   13.20    1.74   0
 -10 -11   9    0.82    0.93   0
 -10 -10  -1   31.50    1.93   0
 -10  -4  -7  146.88    1.78   0
 -10   4 -11    4.53    0.95   0
  -9  -9  -2   15.05    1.30   0
  -9  -5  -6   12.41    0.93   0
  -9  -2  -8    2.53    0.94   0
  -8 -11   4    2.65    1.13   0
  -8 -11   6    4.16    1.16   0
  -8 -10  10   25.55    0.96   0
  -7 -10   2    3.95    1.78   0
  -7  -8  -2   26.23    1.67   0
  -7  10 -12    6.58    0.94   0
  -6  -3  -6   62.55    1.48   0
  -6  12 -12   -0.17    0.67   0
  -5  -9   5  124.02    1.93   0
  -5  -9   6  177.71    2.07   0
  -5  15 -12    2.57    0.70   0
  -4  -8   5  138.03    1.84   0
  -4  -8   6    0.97    0.84   0
  -4  -2  -5  924.85    4.07   0
  -4   1  -7  303.33    2.21   0
  -4   3  -8   12.44    1.16   0
  -4  12 -11    3.17    0.96   0
  -3  -6   9   45.14    1.21   0
  -3  -5  11    0.06    0.64   0
  -3  -1  15    2.89    0.78   0
  -3   1  -6 1568.03    4.94   0
  -3   5  -8    0.04    1.09   0
  -3  16 -11    4.50    0.89   0
  -2  -5   8   60.66    1.20   0
  -2  -4  10  131.52    1.60   0
  -2   3  -6  338.71    2.52   0
  -2   5  -7   71.32    1.19   0
  -2  15 -10    0.11    1.09   0
  -1   2  -4  784.22    4.40   0
  -1   3  15    6.51    0.82   0
  -1  15  -9   88.50    1.48   0
   0   3  -3    0.81    1.15   0
   0   4  14   -0.81    0.77   0
   1   1   8 1179.70    3.92   0
   1   3  11  317.56    2.10   0
   1   4  12  144.21    1.47   0
   1   7  14   23.59    0.97   0
   1   9  15   -1.45    0.75   0
   2   4   8    1.25    0.86   0
   2   8  -2   42.06    1.70   0
   2   9  13    2.81    0.73   0
   2  11  14    1.00    0.71   0
   2  12  -4  114.36    1.98   0
   3   7   7  129.89    1.56   0
   3  13  -2   37.54    1.78   0
   3  15  13    0.37    0.76   0
   3  16  -3   28.22    1.64   0
   4  12   4    1.98    1.19   0
   4  13   8    1.39    0.74   0
   4  14   9    3.17    0.76   0
   4  16  10    1.16    0.76   0
   4  18  11    2.74    0.69   0
   4  19  11    2.81    0.88   0
   4  20  -1    9.25    1.59   0
 -11  -1  -9    1.36    0.89   0
 -11   1 -10    1.74    0.90   0
 -10  -1  -9    0.30    0.79   0
  -9 -11   8    4.46    0.88   0
  -9   4 -11    2.95    0.84   0
  -8 -11   5   16.97    1.22   0
  -8   5 -11   24.16    0.95   0
  -7 -10   8   -0.83    1.01   0
  -7  -8  12    5.17    0.86   0
  -7  -4  -6    1.33    1.06   0
  -7  -1  -8   18.46    1.14   0
  -7   1  -9   47.16    1.23   0
  -7   6 -11    0.96    0.92   0
  -6  -9   9    1.98    0.81   0
  -6   2  -9   31.76    1.22   0
  -6  11 -12   50.78    1.20   0
  -5  -7  11   -0.48    0.87   0
  -5  -2  -6  263.94    2.28   0
  -5   9 -11    4.40    0.95   0
  -5  14 -12   21.52    0.86   0
  -4  -6  -1  602.43    6.40   0
  -4  -6  11    2.16    0.75   0
  -4   5  -9   22.46    1.23   0
  -4   8 -10    0.58    0.74   0
  -4  18 -12   -0.98    1.03   0
  -3  -4  12  110.06    1.36   0
  -3  -3  -3    0.58    1.03   0
  -3  -3  13   39.93    1.05   0
  -3  -2  14   -1.32    0.85   0
  -2   1  15    3.12    0.71   0
  -2   7  -8  639.27    3.05   0
  -1   5  16   18.82    0.83   0
  -1  14  -9    3.68    1.23   0
   0   0  10 1285.23    3.90   0
   0   6  -5   69.48    1.43   0
   0  11  -7    0.38    1.20   0
   0  15  -8   -2.05    1.08   0
   1  17  -7    2.39    1.02   0
   2   8  12   20.39    0.98   0
   2  12  14   11.65    0.89   0
   2  15  -5   78.67    1.75   0
   2  22  -6   -0.08    1.11   0
   2  23  -6   31.41    1.20   0
   2  24  -6   15.34    1.24   0
   2  25  -6   19.89    1.29   0
   3   7   5    0.29    0.84   0
   3   7   6   82.79    1.43   0
   3  11  -1   23.61    1.84   0
   3  11  11   50.07    1.18   0
   3  13  12    9.16    0.83   0
   3  21  -4   24.14    1.45   0
   3  22  -4    4.46    1.22   0
   3  23  -4   56.03    1.59   0
   3  24  -4   -0.10    0.95   0
   3  25  -4   14.06    1.25   0
   4  20  11    2.78    0.82   0
   4  27  -1    8.03    1.60   0
 -12  -8  -4   -0.44    0.94   0
 -12  -7  -5   14.23    0.98   0
 -12  -3  -8   10.43    0.95   0
 -11  -8  -4   -0.51    1.02   0
 -11  -7  -5    2.43    0.98   0
 -11  -3  -8    7.46    0.93   0
 -10   1 -10    4.54    0.70   0
  -9  -4  -7    3.92    1.03   0
  -8  -7  -4   72.16    1.70   0
  -8  -6  -5   10.58    1.06   0
  -8  -2  -8   69.90    1.29   0
  -8   0  -9    0.10    0.76   0
  -8   2 -10   13.73    1.06   0
  -7  -7  13    1.60    0.80   0
  -7   3 -10   -0.04    0.74   0
  -7   9 -12    3.15    0.68   0
  -6  -8  -1   11.16    1.61   0
  -6   4 -10   18.88    0.98   0
  -5  -8   9  183.28    1.78   0
  -5   1  -8    3.70    1.16   0
  -5   3  -9   42.77    1.28   0
  -5  13 -12   -0.55    0.96   0
  -4  -7   9   -0.00    0.79   0
  -4  -5  12   80.04    1.31   0
  -4  -2  15    4.23    0.75   0
  -4  11 -11    6.79    1.06   0
  -4  17 -12    2.16    1.03   0
  -3  -2  -4  357.24    2.92   0
  -3   1  16   10.68    0.77   0
  -3   7  -9    0.63    0.78   0
  -2  -5   3   -0.07    0.96   0
  -2  -5   7   72.31    1.26   0
  -2  -3  11   86.48    1.59   0
  -2   0  14   10.78    0.79   0
  -2   1  -5 1850.61    5.82   0
  -2   3  16    0.59    0.71   0
  -1  -3   8  170.95    1.67   0
  -1  -2  10    4.04    0.71   0
  -1   2  14    2.24    0.77   0
  -1   5  -6    2.21    0.99   0
  -1   7  -7   19.39    1.00   0
  -1  21 -10    2.94    0.86   0
  -1  22 -10   13.88    1.04   0
   0  -1   8    0.02    0.81   0
   0   1  11   -1.10    0.98   0
   0   2  12   18.71    0.92   0
   0   3  13   -0.81    0.63   0
   0   8  -6   31.64    1.18   0
   0  23  -9    0.03    0.82   0
   1   1   3 3920.59   10.99   0
   1   1   7  180.72    1.75   0
   1   6  13    0.17    0.76   0
   1   8  14    4.01    0.82   0
   1  10  15    0.68    0.69   0
   1  12  -6  274.29    2.96   0
   1  16  -7   20.48    1.24   0
   2   4   7   98.86    1.42   0
   2   5   9  165.43    1.72   0
   2   7  11  125.12    1.43   0
   2  10  13    7.09    0.74   0
   2  20  -6    0.61    1.15   0
   2  21  -6   13.57    1.17   0
   2  26  -6    0.54    0.84   0
   3   8   8   50.01    1.10   0
   3   9   9    1.11    0.97   0
   3  10  10    8.91    0.87   0
   3  16  13   -0.19    0.56   0
   3  20  -4    8.34    1.23   0
   3  26  -4    7.81    1.15   0
   4  15   9    6.15    0.84   0
   4  17  10    3.59    0.78   0
 -12  -6  -6   -0.59    1.03   0
 -11  -6  -6   -1.85    0.91   0
 -10 -11   8    5.56    0.99   0
 -10  -3  -8   12.25    0.99   0
 -10   3 -11    6.26    0.74   0
  -9 -11   7    0.05    0.97   0
  -9 -10  10   -0.30    0.72   0
  -9  -1  -9   31.81    1.12   0
  -9   1 -10    0.67    1.00   0
  -9   6 -12    1.77    0.88   0
  -8 -10   9    1.05    0.78   0
  -8  -9  11   -0.25    0.70   0
  -8  -8  -3   11.35    1.41   0
  -8  -5  -6   52.24    1.33   0
  -8   4 -11    6.60    0.92   0
  -7  -9  10    2.47    0.75   0
  -7  -3  -7  387.71    2.70   0
  -6  -7  12   30.53    0.85   0
  -6  -6  13   25.24    0.99   0
  -6  -5  14   43.01    1.10   0
  -6  -2  -7   58.82    1.43   0
  -5  -6  12   31.72    0.97   0
  -5  -5  13   16.57    0.90   0
  -5  -4  14   24.55    0.94   0
  -5  -3  15   13.99    0.75   0
  -5   8 -11    8.40    1.00   0
  -5  12 -12    9.16    0.89   0
  -4  -7   1   23.14    2.08   0
  -4  -3  14    8.68    0.67   0
  -4  -1  -6  486.30    2.87   0
  -3  -6   8  148.92    1.72   0
  -3  -5  10   19.08    1.12   0
  -3  -4  -2 1267.05    7.21   0
  -3   0  15    0.81    0.79   0
  -2  -5   6  189.21    1.89   0
  -2  -4   9   60.72    1.23   0
  -2  -2  12   12.43    0.70   0
  -2  -1  13   32.62    0.89   0
  -2  13 -10   38.76    1.45   0
  -2  20 -11    3.87    0.86   0
  -2  21 -11    2.90    1.00   0
  -1  -3   2   45.65    1.64   0
  -1  -1  11  286.30    2.26   0
  -1   1  13   41.87    0.95   0
  -1   4  15    0.97    0.76   0
  -1   6  16    4.54    1.01   0
  -1  19 -10    0.11    0.91   0
   0  -1   2    1.56    0.54   0
   0   5  14    0.47    0.82   0
   0   7  15   26.40    1.08   0
   0  20  -9   -0.91    0.89   0
   0  21  -9   -0.34    0.99   0
   0  22  -9    1.59    1.01   0
   0  24  -9   26.37    1.20   0
   1   1   6   65.24    1.27   0
   1   3  10   -1.11    0.97   0
   1   4  11   41.72    1.13   0
   1   5  12   19.82    0.88   0
   2   6  10  211.17    1.79   0
   2  13  14   -0.16    0.70   0
   2  19  -6   46.57    2.51   0
   2  27  -6   12.17    1.04   0
   3  12  11    9.94    0.88   0
   3  14  12   35.84    1.02   0
   3  27  -4   12.15    1.19   0
   4  18  10    8.36    0.82   0
 -12  -9  -3    5.49    1.04   0
 -12  -5  -7    0.17    0.99   0
 -11  -9  -3    0.71    0.93   0
 -11   0 -10    2.42    0.77   0
 -10  -8  -4   13.72    1.25   0
 -10  -7  -5   33.88    1.25   0
 -10  -6  -6   -0.84    1.02   0
  -9   3 -11   28.20    1.10   0
  -8  -8  12    4.91    0.83   0
  -7 -10   7  103.70    1.63   0
  -7   8 -12    4.97    0.71   0
  -6  -9   8    9.68    0.91   0
  -6  -8  10    5.09    0.95   0
  -6   6 -11    0.36    0.98   0
  -5  -1  -7    1.67    1.05   0
  -4  -7   8    4.52    1.02   0
  -4  -6  10    2.91    0.97   0
  -4   2  -8  525.24    2.87   0
  -4  10 -11    1.21    1.01   0
  -4  15 -12   -0.28    0.70   0
  -3  -1  -5  110.50    1.68   0
  -3  -1  14   70.41    1.21   0
  -3   2  -7   25.83    1.04   0
  -3   4  -8  185.74    1.77   0
  -3   9 -10    0.38    0.95   0
  -3  13 -11   35.07    1.22   0
  -2  -5   4   18.00    1.17   0
  -2  -5   5   54.44    1.28   0
  -2   2  15   41.48    0.89   0
  -2   4  16    9.76    0.82   0
  -2  18 -11    4.85    0.90   0
  -1  -3   7  127.12    1.52   0
  -1   9  -8   17.55    1.17   0
  -1  18 -10    5.71    0.99   0
   0  -1   7    0.14    0.86   0
   0   0   9    0.77    0.96   0
   0   4  -4  997.68    5.02   0
   0   4  13   12.53    0.90   0
   0  19  -9   -0.48    1.02   0
   1   1   4  824.40    4.46   0
   1   1   5   49.33    1.28   0
   1   7  -4   41.50    1.33   0
   1   7  13   23.24    0.98   0
   1   9  -5  147.40    1.92   0
   1   9  14   25.19    0.93   0
   1  11  15   -0.55    0.57   0
   1  15  -7   33.07    1.39   0
   2   4   6  543.03    3.04   0
   2   9  12    4.93    0.82   0
   2  11  13    1.65    0.76   0
   2  14  -5  458.13    3.29   0
   2  14  14    3.24    0.82   0
   3   8   7    0.55    0.90   0
   3  11  10   96.25    1.41   0
   3  15  -3   38.98    1.60   0
   3  15  12   12.87    0.83   0
   3  19  -4  152.49    2.48   0
   4  16   9    0.17    0.60   0
   4  19  10    1.29    0.73   0
   4  28  -1   13.67    1.74   0
 -11  -5  -7   -0.91    0.90   0
 -11  -2  -9   22.95    1.05   0
 -10   0 -10    9.50    0.96   0
  -9 -11   6   26.21    1.32   0
  -9  -9  11   22.18    1.02   0
  -9  -3  -8    0.81    0.99   0
  -8  -4  -7    0.80    0.89   0
  -8   1 -10    0.22    0.86   0
  -8   6 -12   37.16    1.12   0
  -7  -8  11   70.48    1.26   0
  -7   0  -9   -0.55    0.94   0
  -7   2 -10   10.00    1.04   0
  -6   3 -10    1.93    0.86   0
  -6   9 -12   51.55    1.08   0
  -5  -8   8    0.87    0.97   0
  -5  -7  10    1.11    0.84   0
  -5  11 -12    5.48    1.06   0
  -4  -1  15   43.63    1.00   0
  -4   4  -9   38.27    1.06   0
  -4  14 -12    5.56    0.93   0
  -3  -6   7    0.10    0.89   0
  -3  -4  11    1.77    0.64   0
  -3  -3  12    5.05    0.82   0
  -3  -2  13   16.01    0.94   0
  -3   6  -9   47.02    1.11   0
  -2  -3  10   10.09    1.03   0
  -2   6  -8    0.41    0.81   0
  -2  12 -10   13.58    1.07   0
  -2  17 -11    9.22    0.98   0
  -1  -2   9    6.38    0.78   0
  -1   3  14    0.59    0.60   0
  -1   5  15    0.20    0.78   0
   0   3  12    1.04    0.80   0
   0   8  15    2.16    0.82   0
   0  13  -8   -0.11    0.86   0
   0  18  -9   51.79    1.42   0
   1   2   8   -0.34    0.78   0
   1  21  -8   30.30    1.14   0
   1  22  -8   20.49    1.16   0
   1  24  -8    3.91    0.99   0
   1  25  -8    0.42    0.96   0
   2   4   5  315.27    2.52   0
   2   8  11   99.51    1.34   0
   2  11  -4  193.32    2.30   0
   3   9   8   -0.73    0.88   0
   3  10   9   63.23    1.28   0
   3  13  11   26.45    1.04   0
   4  15   8    7.42    0.75   0
   4  17   9    6.66    0.77   0
   4  20  10    9.13    0.83   0
 -10 -11   7    6.24    0.99   0
 -10  -9  -3    5.72    1.33   0
 -10  -5  -7    8.97    0.96   0
 -10  -2  -9   16.13    1.11   0
 -10   2 -11    3.13    0.75   0
  -9 -11   3   22.65    1.99   0
  -9 -10   9   45.92    1.16   0
  -9   5 -12   29.90    1.12   0
  -8 -10   8    5.24    0.96   0
  -8  -9  10   24.77    1.03   0
  -8  -1  -9   10.91    1.04   0
  -8   3 -11    1.29    0.95   0
  -7 -10   6   15.05    1.08   0
  -7  -9   9    0.86    0.90   0
  -7  -2  -8   10.81    1.08   0
  -7   4 -11   84.59    1.39   0
  -7   7 -12   19.13    0.83   0
  -6  -9   7   80.60    1.47   0
  -6  -7  11   13.53    0.95   0
  -6  -1  -8  101.22    1.75   0
  -5  -8   1  828.22   10.89   0
  -5  -5  -4  205.34    2.38   0
  -5  -4  -5  170.95    2.04   0
  -5  -2  15    0.36    0.78   0
  -5   2  -9   54.03    1.43   0
  -5   7 -11   -0.59    0.73   0
  -4  -5  11    5.53    0.86   0
  -4  -2  14   16.48    0.90   0
  -4   9 -11   -0.28    1.00   0
  -4  13 -12    1.16    0.97   0
  -3  -6   2  314.98    3.81   0
  -3  -5   9   18.92    1.11   0
  -3   0  -6  242.29    2.22   0
  -3   1  15    5.16    0.80   0
  -3  12 -11   12.87    1.07   0
  -3  18 -12   -1.49    1.07   0
  -2  -4   8    1.64    0.87   0
  -2   0  13   -0.56    0.84   0
  -2   2  -6  602.04    3.20   0
  -2   3  15   22.21    0.93   0
  -2   8  -9   15.49    1.11   0
  -2  16 -11   15.76    1.03   0
  -1  -3   6   13.53    0.93   0
  -1  -1  10   29.84    1.06   0
  -1   2  13   -0.95    0.78   0
  -1   6  -7   24.54    1.03   0
  -1  16 -10    6.98    1.07   0
   0  -1   6    0.00    0.82   0
   0   1  10    0.17    0.73   0
   0   2  11  306.82    2.05   0
   0   6  14   37.39    0.88   0
   0   7  -6   -0.73    0.93   0
   0  17  -9   -0.26    1.08   0
   1   3   9  307.81    2.14   0
   1   6  12   32.48    0.80   0
   1  10  14    4.97    0.81   0
   1  11  -6  140.36    1.72   0
   1  14  -7    9.01    1.15   0
   1  20  -8    3.66    1.01   0
   2   4   4  197.11    2.25   0
   2   6   9   62.01    1.29   0
   2   7  10    5.90    0.93   0
   2   9  -3  324.27    3.13   0
   2  10  12    0.47    0.74   0
   2  12  13    9.68    0.70   0
   2  15  14    1.17    0.55   0
   2  17  -6   38.89    1.34   0
   3   8   6   32.23    1.12   0
   3  16  12   12.09    0.81   0
   3  18  -4   81.69    1.89   0
 -11  -4  -8    7.98    0.93   0
  -9 -11   5   12.19    1.26   0
  -9  -7  -5    2.99    0.91   0
  -9  -6  -6   11.49    1.13   0
  -9  -2  -9   18.73    1.02   0
  -9   0 -10   37.50    1.22   0
  -9   2 -11   14.80    1.00   0
  -7 -10   3   95.11    2.34   0
  -7 -10   5    0.92    1.16   0
  -7  -6  13    3.31    0.73   0
  -7  10 -13   10.68    1.00   0
  -6  -6  -4   39.96    1.32   0
  -6  -6  12    7.16    0.87   0
  -6  -4  -6   32.28    1.19   0
  -6  -4  14   13.04    0.92   0
  -6   8 -12   -0.72    0.74   0
  -5  -8   7  269.05    2.25   0
  -5   4 -10   45.29    1.05   0
  -5  10 -12   36.89    1.00   0
  -4  -7   7  182.08    1.90   0
  -4  -4  12    2.70    0.84   0
  -4  -3  13   31.48    0.96   0
  -3  -6   6  737.46    3.45   0
  -3   8 -10    8.64    1.14   0
  -3  17 -12    2.96    0.76   0
  -2   5  16   -0.90    0.57   0
  -1  -3   3  128.63    2.31   0
  -1  -3   5  451.12    3.05   0
  -1   0  11   -1.53    0.86   0
  -1   1  12    7.11    0.66   0
  -1   4  -6    1.69    0.96   0
  -1   4  14    0.25    0.81   0
  -1   8  -8    5.73    1.13   0
  -1  11  -9   11.17    1.26   0
  -1  15 -10    2.24    0.99   0
   0  -1   5    1.10    0.97   0
   0   0   8 2165.32    5.10   0
   0   5  -5   -0.15    0.87   0
   0   5  13   -0.90    0.96   0
   0   9  -7   28.52    2.05   0
   0   9  15   -0.08    0.79   0
   0  16  -9    3.63    0.94   0
   1   4  10   32.17    1.13   0
   1   5  11   35.65    0.90   0
   1   8  13    6.97    0.69   0
   1  19  -8    9.14    1.17   0
   2   5   7   64.68    1.24   0
   2  13  -5   59.71    1.65   0
   2  13  13   24.90    0.93   0
   3   8   5    1.48    0.81   0
   3  12  10    9.27    0.80   0
   3  14  11   51.95    1.12   0
   3  17  12    0.93    0.72   0
   4  14   6  109.76    1.95   0
 -11 -11   7   -0.07    0.90   0
 -11  -1 -10    2.24    0.90   0
 -10 -10   9   14.12    1.04   0
 -10  -4  -8    2.64    0.89   0
  -9 -11   4   58.41    1.88   0
  -9  -8  -4   20.20    1.18   0
  -9  -5  -7   18.08    1.09   0
  -9   4 -12    6.23    0.90   0
  -8  -8  11    2.00    0.91   0
  -8  -3  -8   19.57    1.05   0
  -8   5 -12   14.98    0.99   0
  -7 -10   4  195.85    2.79   0
  -7  -6  -5   33.91    1.32   0
  -7  -5  -6  415.09    2.91   0
  -7   1 -10    6.77    0.99   0
  -7   6 -12   17.14    1.02   0
  -6  -8   9    5.75    0.88   0
  -6  -5  13    0.40    0.58   0
  -6  11 -13    1.11    0.99   0
  -5  -7   9   34.06    1.24   0
  -5  -4  13    1.65    0.63   0
  -5  -3  -6   16.45    1.08   0
  -5   9 -12    1.41    0.92   0
  -5  14 -13    9.33    0.77   0
  -4  -6   9   78.62    1.48   0
  -4  -4  -4  904.42    4.55   0
  -4  -3  -5 1391.19    5.07   0
  -4   0  15    0.35    0.87   0
  -4   3  -9  195.92    1.88   0
  -4   8 -11    2.74    0.88   0
  -4  12 -12    2.08    0.74   0
  -3  -4  10  174.96    1.97   0
  -3   0  14    0.01    0.58   0
  -3   5  -9   21.05    1.23   0
  -3  16 -12   16.61    0.81   0
  -2   2  14    0.97    0.80   0
  -2  15 -11    0.57    0.71   0
  -1  -3   4  343.53    2.99   0
  -1  -2   8   -0.24    0.82   0
  -1   6  15   -1.60    0.71   0
   0  -1   3    0.80    0.76   0
   0  -1   4    0.11    1.07   0
   0   7  14   -0.29    0.73   0
   1   2   7  287.83    2.06   0
   1   7  12    5.11    0.88   0
   1  11  14   23.70    0.95   0
   1  13  -7   11.81    1.06   0
   2   9  11  104.62    1.29   0
   2  11  12   52.58    1.17   0
   2  16  -6   88.48    1.80   0
   3   9   7  204.55    2.09   0
   3  10   8  133.69    1.75   0
   3  11   9    0.31    0.86   0
   3  15  11    6.92    0.83   0
   3  17  -4  174.23    2.66   0
   3  18  12    0.62    0.73   0
 -12 -10  -2    6.19    1.24   0
 -11  -3  -9   81.12    1.43   0
 -10 -11   6    0.65    1.00   0
 -10  -1 -10    6.53    0.91   0
 -10   1 -11   -0.49    0.92   0
  -9 -10  -1   45.73    2.31   0
  -9  -9  10    1.05    0.91   0
  -8 -10   7   54.28    1.51   0
  -8  -9  -2    3.88    1.41   0
  -8  -7  12   19.25    0.97   0
  -8   0 -10   43.30    1.21   0
  -8   2 -11    4.04    0.89   0
  -7  -9   8   16.61    1.06   0
  -7  -8  10   32.46    1.07   0
  -7  -7  -4  192.63    2.38   0
  -7  -1  -9   43.61    1.19   0
  -7   3 -11   83.16    1.36   0
  -7   9 -13    8.81    0.76   0
  -6  -9   6   36.16    1.30   0
  -6  -7  -3  161.55    2.41   0
  -6  -3  -7    0.90    1.01   0
  -6   2 -10    1.39    0.91   0
  -6   7 -12   36.32    1.17   0
  -5  -1  15   -0.67    0.84   0
  -4  -7   6  119.11    1.77   0
  -4   1  -8   58.98    1.38   0
  -3  -6   5  248.74    2.29   0
  -3  -5   8    0.61    0.98   0
  -3  -3  11   -2.05    1.17   0
  -3  -2  12   51.52    1.14   0
  -3  -1  13   55.77    1.13   0
  -3   2  15    0.37    0.77   0
  -3   7 -10    6.68    1.01   0
  -3  15 -12   13.62    0.85   0
  -2  -3   9  118.92    1.54   0
  -2  -1  -4 1315.07    5.59   0
  -2   3  -7  215.74    1.91   0
  -2   4  15   35.11    0.93   0
  -2   7  -9   59.78    1.38   0
  -2  14 -11    1.99    1.05   0
  -1   0  -3    1.40    1.01   0
  -1   1  -4  869.64    4.62   0
  -1   3  13   88.24    1.31   0
  -1  21 -11    8.51    1.00   0
   0   1   9    0.04    0.95   0
   0   3  11   -1.52    0.94   0
   0   4  12   21.90    0.77   0
   0  10  15   34.22    1.04   0
   0  11  -8   -0.31    1.05   0
   0  15  -9    1.24    1.00   0
   1   4  -2   12.41    1.20   0
   1   8  -5    1.57    0.96   0
   1   9  13   -1.14    0.69   0
   1  10  -6    1.31    1.52   0
   1  17  -8  106.96    1.68   0
   2   6   8    0.14    0.92   0
   2   7   9   49.89    1.21   0
   2   8  10   68.63    1.27   0
   2  14  13    9.79    0.81   0
   2  23  -7    1.22    0.87   0
   2  24  -7    2.20    0.89   0
   2  25  -7    4.18    1.14   0
   3  13  10   15.24    0.91   0
   3  19  12    4.61    0.76   0
   4  24  -2    4.36    1.50   0
 -12  -8  -5    0.96    0.99   0
 -12  -7  -6    0.94    0.73   0
 -11 -10  -2    0.90    1.14   0
 -11  -7  -6   20.87    1.18   0
 -10  -3  -9    3.11    0.82   0
  -9 -10   8   21.06    1.01   0
  -9  -4  -8   29.23    1.10   0
  -9  -1 -10    2.67    0.94   0
  -9   1 -11    4.64    0.86   0
  -8  -9   9    0.39    0.93   0
  -8  -6  13    1.04    0.68   0
  -8  -2  -9    5.26    1.05   0
  -8   4 -12   24.01    1.44   0
  -7  -4  -7  128.38    1.77   0
  -7   5 -12   18.69    0.95   0
  -7   8 -13    7.25    0.93   0
  -6  -7  10   55.25    1.19   0
  -6   4 -11    1.18    0.72   0
  -6  10 -13   -0.86    1.07   0
  -5  -8   6   43.31    1.31   0
  -5  -2  -7   93.34    1.43   0
  -5   1  -9    1.75    1.12   0
  -5   3 -10    1.53    0.95   0
  -5  12 -13    1.25    0.85   0
  -4  -2  -6  376.94    2.60   0
  -4  -1  14    3.98    0.62   0
  -4  16 -13    3.44    0.73   0
  -3  -6   3  270.64    2.93   0
  -3  -6   4   23.41    1.12   0
  -3  10 -11   22.10    0.92   0
  -2  -2  -3  643.07    4.55   0
  -2   0  -5    0.66    0.95   0
  -2   0  12   32.54    1.02   0
  -2   1  13   31.01    0.93   0
  -1  -1   9    1.98    0.92   0
  -1   2  12   30.26    0.99   0
  -1   5  14   64.88    1.13   0
  -1   7  15   -0.50    0.71   0
  -1  10  -9   37.59    1.09   0
  -1  19 -11   21.33    1.05   0
   0   0   7   -0.82    0.85   0
   0   2  10  337.88    2.06   0
   0   6  13   48.03    1.11   0
   0   8  14   -1.26    0.73   0
   0  21 -10    0.91    0.87   0
   0  22 -10   15.64    1.12   0
   0  23 -10    0.05    0.93   0
   1   2   6   28.20    1.00   0
   1   3   8  179.79    1.69   0
   1   5  -3    5.87    1.12   0
   1   6  11    3.85    0.82   0
   1  12  14   -0.39    0.65   0
   1  16  -8   19.96    1.09   0
   2   5   6  169.20    1.84   0
   2  10  11    1.39    0.79   0
   2  12  12    4.97    0.74   0
   2  15  -6    3.82    1.03   0
   2  15  13   26.33    0.97   0
   2  21  -7    0.71    0.97   0
   2  22  -7   15.62    1.19   0
   2  26  -7   -0.22    0.93   0
   3   9   1    1.92    1.43   0
   3  16  11    3.49    0.74   0
   3  23  -5   -0.15    0.90   0
   3  24  -5   26.76    1.33   0
   3  25  -5    3.58    1.12   0
   3  26  -5   -0.13    1.07   0
   4  15   6    3.97    0.96   0
   4  22  -2   37.46    2.18   0
   4  22   9    3.17    0.78   0
   4  23  -2    6.57    1.36   0
   4  23   9    0.57    0.89   0
   4  25  -2    5.42    1.40   0
 -12  -6  -7   -0.39    0.81   0
 -11 -11   6    0.24    0.91   0
 -11  -8  -5   32.67    1.43   0
 -11  -6  -7    1.72    0.90   0
 -10  -9  10   -2.00    1.04   0
  -9  -9  -3   87.64    1.95   0
  -9   3 -12   -0.83    0.95   0
  -8  -7  -5   22.58    1.36   0
  -7  -9  -1    0.56    1.70   0
  -7  -7  11   19.88    0.92   0
  -7  -6  12   15.83    0.93   0
  -7  -4  14   -0.16    0.62   0
  -6  -9   5  504.98    3.49   0
  -6  -3  14    0.24    0.73   0
  -6   6 -12    8.44    1.02   0
  -5  -6  10   11.62    0.89   0
  -5  -2  14    5.85    0.64   0
  -5   8 -12   16.05    0.84   0
  -4  -6   8    5.26    1.09   0
  -4  -5  -3   75.90    1.66   0
  -4  -3  12   19.84    1.02   0
  -4  -2  13   26.97    0.79   0
  -4   1  15   45.03    1.10   0
  -4   7 -11    2.42    0.66   0
  -4  10 -12   10.91    1.03   0
  -4  15 -13    3.30    0.78   0
  -3   1  14   67.45    1.13   0
  -3  13 -12   11.83    0.96   0
  -2   3  14   14.55    0.94   0
  -2   5  15    4.31    0.82   0
  -2  18 -12    0.18    0.85   0
  -2  19 -12   12.38    1.09   0
  -1  -2   7  307.43    2.18   0
  -1   0  10   30.61    1.15   0
  -1   1  11  295.87    2.03   0
  -1   2  -5 1249.26    4.86   0
  -1   5  -7   68.37    1.37   0
  -1   7  -8   20.66    1.20   0
  -1  13 -10   17.90    0.85   0
  -1  18 -11    3.68    0.92   0
   0   6  -6   75.33    1.58   0
   0   8  -7  134.83    1.73   0
   0  11  15   -0.79    0.70   0
   0  19 -10   -0.80    0.90   0
   0  20 -10  188.01    1.98   0
   1   4   9  108.13    1.54   0
   1   8  12    0.68    0.76   0
   1  10  13   24.40    0.89   0
   1  12  -7   63.73    1.52   0
   1  13  14    3.33    0.80   0
   2  10  -4   35.67    1.26   0
   2  12  -5  178.00    2.14   0
   2  16  13    7.35    0.85   0
   2  20  -7    5.28    1.11   0
   3  12   9   71.10    1.17   0
   3  14  10   89.52    1.45   0
   3  16  -4   25.16    1.36   0
   3  17  11   20.86    0.98   0
   3  21  -5    8.24    1.19   0
   3  27  -5   -0.36    1.06   0
   4  14   3    0.62    1.03   0
   4  14   4   25.43    1.39   0
   4  26  -2    0.37    1.26   0
 -12  -9  -4    0.60    1.09   0
 -11  -5  -8    4.94    0.83   0
 -10 -11   5    1.02    0.95   0
 -10 -10   8   47.75    1.38   0
 -10  -7  -6   28.55    1.18   0
 -10  -6  -7   25.95    1.19   0
 -10   0 -11    1.00    0.92   0
  -9  -3  -9   45.55    1.22   0
  -8 -10   6    1.61    0.98   0
  -8  -5  -7    4.15    1.01   0
  -8   1 -11    1.65    0.85   0
  -8   6 -13   -0.35    0.94   0
  -7  -3  -8   99.34    1.41   0
  -7   0 -10    2.34    0.91   0
  -7   2 -11   35.38    1.16   0
  -7   7 -13    3.36    0.86   0
  -6  -9   2  626.97    5.93   0
  -6  -8   8    4.46    0.93   0
  -6  -6  11   -0.18    0.77   0
  -6  -4  13    7.59    0.79   0
  -6   1 -10    9.24    0.88   0
  -6   9 -13   19.36    0.90   0
  -5  -8   5   51.42    1.50   0
  -5  -7   8   92.42    1.60   0
  -5  -5  11   28.62    0.96   0
  -5  -4  12    2.19    0.87   0
  -5  -3  13   21.01    0.76   0
  -5  -1  -8    5.96    1.15   0
  -5   0  15   -0.62    0.85   0
  -5  11 -13    2.74    0.68   0
  -4  -7   5 1361.80    5.09   0
  -4  -1  -7  275.95    2.14   0
  -4   2  -9   38.59    1.24   0
  -4   4 -10   23.24    1.17   0
  -3  -2  -5  150.03    1.80   0
  -3   0  13    0.09    0.84   0
  -3   3  15   -0.85    0.73   0
  -3   4  -9  539.13    2.84   0
  -3   6 -10   62.81    1.35   0
  -3   9 -11    6.66    0.72   0
  -2  -4   6  637.82    3.17   0
  -2   1  -6  574.88    3.24   0
  -2  12 -11   50.72    1.41   0
  -2  17 -12   -0.54    0.82   0
  -1  -1  -2  162.41    2.71   0
  -1   4  13    1.19    0.87   0
  -1   6  14   -0.55    0.85   0
  -1   8  15   -0.15    0.84   0
  -1  12 -10    2.02    0.92   0
   0   2  -3 5219.78   12.58   0
   0   5  12   -0.05    0.58   0
   0   7  13   -1.52    0.88   0
   0   9  14    0.06    0.79   0
   0  10  -8   84.94    1.63   0
   0  13  -9    0.03    0.96   0
   0  18 -10   18.75    1.04   0
   1   2   5 1157.69    4.68   0
   1   6  -4   50.05    1.42   0
   1  15  -8  114.24    1.70   0
   1  22  -9    0.86    0.90   0
   1  23  -9    2.17    1.04   0
   1  24  -9   17.15    1.12   0
   2   5   5   50.70    1.25   0
   2   6   7  113.29    1.48   0
   2   9  10   15.22    0.95   0
   2  11  11    1.81    0.84   0
   2  13  12    7.30    0.78   0
   2  17  13    0.03    0.76   0
   3  10   7   14.56    0.98   0
   3  18  11   16.17    0.96   0
   4  17   7    1.20    0.74   0
   4  20   8    5.73    0.91   0
   4  27  -2   -0.33    1.37   0
 -11  -9  -4   35.20    1.41   0
 -10 -10  -2   13.68    1.61   0
 -10  -8  -5    1.79    0.95   0
 -10  -5  -8    0.91    0.82   0
 -10  -2 -10   39.15    1.17   0
  -9 -10   7    3.90    1.06   0
  -8  -8  -4   29.75    1.40   0
  -8  -8  10    0.76    0.81   0
  -8  -4  -8   31.15    1.09   0
  -8  -1 -10    0.80    1.02   0
  -8   3 -12    5.34    0.97   0
  -7  -9   7  124.80    1.70   0
  -7  -8  -3   91.60    2.10   0
  -7  -8   9   54.94    1.29   0
  -7   4 -12   23.58    1.09   0
  -6  -9   4   36.81    1.51   0
  -6   3 -11   20.00    0.88   0
  -6   8 -13    0.99    0.86   0
  -5   7 -12    7.54    1.02   0
  -5  10 -13    2.26    0.83   0
  -4   0  14    0.51    0.70   0
  -4   6 -11    2.54    0.81   0
  -3  -5   7  272.20    2.12   0
  -3  -3  -4  357.11    2.94   0
  -3  -3  10   81.96    1.41   0
  -3  -1  -6 1509.00    5.04   0
  -3  -1  12   28.63    0.91   0
  -3  17 -13   34.99    1.16   0
  -2  -3   8  254.18    1.87   0
  -2   2  13   10.93    0.92   0
  -2   4  -8    2.35    0.68   0
  -2   6  -9   69.34    1.26   0
  -1   3  -6   14.77    0.97   0
  -1  16 -11    8.91    0.97   0
   0   0   6 1078.84    4.20   0
   0   1   8   -0.19    0.57   0
   0   4  11  263.61    1.93   0
   0  17 -10   -0.34    0.97   0
   1   3   7  122.58    1.50   0
   1   7  11   63.01    1.06   0
   1   9  -6   20.32    1.05   0
   1   9  12    7.32    0.94   0
   1  11  13    1.47    0.69   0
   1  14  14    0.48    0.69   0
   1  21  -9   39.88    1.25   0
   2   7   8  506.45    2.82   0
   2   8   9   14.02    0.98   0
   2  14  -6   37.02    1.32   0
   2  14  12    1.79    0.86   0
   2  18  -7    3.21    0.96   0
   3  13   9   20.14    0.98   0
   3  15  10   12.88    0.88   0
   3  19  -5  105.59    2.03   0
   3  19  11   19.75    1.02   0
   4  15   5    1.99    1.05   0
   4  16   6  123.01    1.95   0
 -11 -11   5    1.66    1.13   0
 -11 -10   8    1.31    0.89   0
 -11  -4  -9    7.28    0.93   0
 -10 -11   2    5.57    1.87   0
 -10 -11   4   20.75    1.42   0
  -9  -9   9   18.55    0.93   0
  -9   0 -11    0.48    0.66   0
  -9   2 -12   13.05    1.06   0
  -8  -9   8  141.29    1.89   0
  -8  -7  11    0.30    0.85   0
  -8  -5  13   -0.18    0.82   0
  -8   5 -13   -1.71    0.84   0
  -7  -3  14    5.08    0.83   0
  -6  -9   3  330.18    3.56   0
  -6  -1  -9   51.27    1.11   0
  -6   5 -12   42.91    1.01   0
  -5  -1  14    7.01    0.84   0
  -5   2 -10   51.79    1.06   0
  -5   4 -11   88.23    1.43   0
  -4  -7   2 1497.80    8.13   0
  -4  -7   4    7.50    0.95   0
  -4  -5   9   39.92    1.21   0
  -4  -1  13    0.13    0.83   0
  -4   0  -8    0.15    1.09   0
  -4   2  15    2.66    0.80   0
  -3  -2  11   67.65    1.10   0
  -3   2  14   -1.23    0.76   0
  -3   4  15    1.97    0.79   0
  -3  16 -13    0.19    0.93   0
  -2  -2   9   99.49    1.45   0
  -2   4  14    1.43    0.75   0
  -2   6  15    1.67    0.72   0
  -2  11 -11    3.17    1.02   0
  -2  15 -12    3.14    0.88   0
  -1  -2   6   28.84    1.05   0
  -1  -1   8 1233.06    3.93   0
  -1   3  12    8.87    0.68   0
  -1   9  15    1.12    0.72   0
   0   2   9  290.58    2.10   0
   0   3  10    0.90    0.70   0
   0   4  -5  146.09    1.90   0
   0   6  12    7.84    0.79   0
   0  10  14   32.91    0.90   0
   0  12  -9   11.02    1.07   0
   1   2   4  746.61    4.28   0
   1   3  -1 2480.25   14.27   0
   1   4   8  130.78    1.53   0
   1   6  10    0.12    0.94   0
   1  11  -7   35.73    1.32   0
   1  14  -8    4.66    1.10   0
   1  15  14   24.31    0.91   0
   1  19  -9   85.29    1.55   0
   2   5   4   15.99    1.02   0
   2   7  -2  127.13    2.58   0
   2  10  10  140.84    1.60   0
   2  12  11   36.86    1.14   0
   2  17  -7  148.70    1.92   0
   3  12   8   44.87    1.36   0
   3  15  -4   32.84    1.57   0
   3  16  10    4.63    0.82   0
   3  20  11    0.86    0.73   0
   4  20  -2    3.49    1.19   0
   4  23   8    0.21    0.87   0
   4  24   8    0.18    0.92   0
 -12 -11   5    1.39    1.02   0
 -10 -11   3   25.32    2.14   0
 -10  -4  -9    1.46    0.89   0
  -9  -7  -6  103.42    1.67   0
  -9  -6  -7   -0.08    0.99   0
  -9  -2 -10   20.82    0.87   0
  -8 -10   5  177.67    2.36   0
  -8  -6  12   32.03    0.92   0
  -8  -3  -9  218.56    2.04   0
  -7  -7  10   22.49    1.03   0
  -7  -4  13    5.05    0.86   0
  -7   1 -11    1.90    0.87   0
  -7   6 -13    3.32    0.74   0
  -6  -8   7  162.75    1.98   0
  -6  -7   9    0.49    0.84   0
  -6  -5  -6   44.94    1.38   0
  -6  -4  -7    0.82    0.94   0
  -6  -2  14    0.46    0.61   0
  -5  -8   4   60.57    1.50   0
  -5  -6   9    0.28    0.95   0
  -5  -4  -6  357.35    2.61   0
  -5   0  -9    0.47    0.79   0
  -5   1  15    0.88    0.84   0
  -5   6 -12   33.84    1.19   0
  -5   9 -13    0.12    0.85   0
  -4  -7   3  255.11    2.87   0
  -4  -6   7  169.98    1.84   0
  -4  -4  10   24.51    1.08   0
  -4   8 -12    0.17    0.98   0
  -3  -5  -1  457.04    6.05   0
  -3   5 -10   19.34    1.14   0
  -3  15 -13   -0.97    0.84   0
  -2  -4   5  359.97    2.64   0
  -2  -1  10  223.80    1.87   0
  -2   0  11    0.72    0.83   0
  -1   0   9    0.44    0.92   0
  -1   1  10   27.97    1.11   0
  -1   2  11  302.53    1.96   0
  -1   5  13    7.70    0.71   0
  -1   6  -8   31.36    0.94   0
  -1   7  14   27.21    0.93   0
  -1   8  -9   25.31    1.19   0
  -1  11 -10    5.44    0.77   0
  -1  15 -11   37.04    1.01   0
   0   7  -7   -0.62    0.88   0
   0   8  13   63.51    1.15   0
   0   9  -8    0.52    1.16   0
   0  16 -10  287.20    2.23   0
   1   2   2   44.11    1.55   0
   1   5   9   45.97    1.05   0
   1   8  11  298.66    2.04   0
   1  12  13   14.28    0.75   0
   1  18  -9    2.39    1.06   0
   2   8  -3    0.67    0.85   0
   2  11  -5   69.12    1.83   0
   2  15  12    2.13    0.74   0
   3  14   9   16.78    0.89   0
   3  17  10    1.25    0.87   0
   3  18  -5   49.85    1.54   0
   4  15   4   -0.00    1.06   0
   4  19   7    4.52    0.87   0
   4  28  -2    1.23    1.52   0
 -10  -9   9   -0.16    0.84   0
 -10  -1 -11    0.87    0.68   0
  -9  -8  10    0.95    0.74   0
  -9  -5  -8   -0.94    0.95   0
  -8   0 -11    0.72    0.93   0
  -8   2 -12   -0.06    0.95   0
  -7  -6  11    0.93    0.80   0
  -7  -5  -7   13.61    1.05   0
  -7  -5  12   20.19    0.97   0
  -7  -1 -10    5.31    0.99   0
  -7   3 -12    1.88    0.95   0
  -6  -6  -5   55.96    1.50   0
  -6  -6  10   44.11    1.15   0
  -6  -3  13  131.07    1.47   0
  -6   0 -10   47.97    1.16   0
  -6   2 -11   -1.23    0.99   0
  -6   7 -13   64.55    1.16   0
  -5  -8   2  108.77    2.53   0
  -5  -8   3   89.42    1.95   0
  -5  -7  -2    7.26    1.18   0
  -5  -7   7    4.49    1.03   0
  -5  -3  -7    6.05    1.08   0
  -5  -3  12   22.94    0.95   0
  -4  -3  11   68.55    1.07   0
  -4   1  14    4.68    0.81   0
  -4   3 -10   10.91    0.81   0
  -4   5 -11    4.54    0.94   0
  -4  11 -13    1.13    0.91   0
  -3  -5   6  482.89    2.83   0
  -3  -4  -3  724.39    4.57   0
  -3  -4   8  175.09    1.77   0
  -3   1  13   55.37    0.99   0
  -2  -3   7  206.47    1.83   0
  -2   3  13    5.10    0.82   0
  -2   5  14    5.90    0.87   0
  -2   7  15    7.16    0.79   0
  -2  10 -11    2.47    0.87   0
  -2  14 -12    3.05    0.98   0
  -1   4  -7   54.33    1.10   0
  -1  10  15    0.42    0.74   0
  -1  14 -11   18.53    1.13   0
   0   0   5    0.62    0.97   0
   0   1  -2    2.27    0.56   0
   0   1   7    0.45    0.86   0
   0   5  -6   -1.38    1.02   0
   0   5  11   -0.79    0.92   0
   0  11  14   -1.35    0.70   0
   0  15 -10    1.57    0.99   0
   1   2   3 4329.04   11.75   0
   1  10  12    6.99    0.74   0
   1  13  -8   20.79    1.34   0
   1  13  13   26.66    1.01   0
   1  17  -9    2.69    0.96   0
   2   6   6  343.21    2.50   0
   2   9   9   88.04    1.44   0
   2  13  -6  225.82    2.35   0
   2  13  11   76.81    1.34   0
   2  16  -7    5.15    1.08   0
   2  16  12   10.08    0.93   0
   2  24  -8   23.95    1.45   0
 -12  -7  -7   -0.52    0.89   0
  -9  -7  11    3.36    0.77   0
  -9  -6  12    1.09    0.83   0
  -9  -1 -11   -1.52    0.82   0
  -9   1 -12   11.87    1.11   0
  -8   4 -13   22.36    1.14   0
  -7  -9   6    9.88    1.12   0
  -6  -8  -2   69.76    2.11   0
  -6  -5  11   10.74    0.88   0
  -6  -4  12    1.72    0.74   0
  -6  -3  -8   14.97    1.21   0
  -5  -4  11   80.44    1.27   0
  -5  -2  -8   67.60    1.44   0
  -5   1 -10    0.56    0.92   0
  -5   3 -11   -1.41    0.85   0
  -4  -3  -6  445.07    2.74   0
  -4   1  -9    3.87    0.81   0
  -4   3  15   44.28    0.95   0
  -3   3  14   -0.41    0.73   0
  -3   5  15    6.03    0.80   0
  -3   7 -11  104.97    1.33   0
  -3  14 -13    1.87    0.67   0
  -2  -4   4  213.76    2.28   0
  -2   3  -8  267.61    2.05   0
  -2   7 -10    5.95    0.88   0
  -1  -2   5 1179.73    4.74   0
  -1   4  12  151.84    1.40   0
  -1   8  14    2.24    0.85   0
  -1  10 -10    0.94    1.03   0
  -1  20 -12   28.61    0.99   0
   0   4  10  867.86    3.28   0
   0   7  12   -0.66    0.79   0
   0   9  13   -0.87    0.74   0
   0  11  -9    0.43    1.18   0
   0  12  14   -1.34    0.77   0
   1   3   6   13.44    0.71   0
   1  10  -7  297.43    2.48   0
   2   7   7    5.15    0.88   0
   2   8   8   60.42    1.35   0
   2   9  -4   31.44    1.27   0
   2  11  10  134.61    1.59   0
   2  17  12    0.49    0.77   0
   3   9   2    8.01    1.18   0
   3  13   8    1.02    0.88   0
   3  18  10    4.09    0.80   0
   3  24  -6    2.63    1.20   0
   4  15   3   14.85    1.79   0
 -12 -11   4    1.94    1.14   0
 -12 -10  -3    5.09    1.20   0
 -12  -8  -6   -0.53    0.76   0
 -11 -10   7    2.02    0.96   0
 -11  -8  -6    0.62    1.00   0
 -11  -7  -7    1.40    0.92   0
 -11  -6  -8    0.15    0.89   0
 -10  -8  10    0.50    0.88   0
  -8  -6  -7    9.17    1.14   0
  -8  -4  13   25.78    1.10   0
  -7  -2  14    0.26    0.73   0
  -6  -1  14    0.21    0.87   0
  -5   2  15   -1.52    0.89   0
  -5  11 -14   -1.50    0.87   0
  -4  -5   8  207.46    1.96   0
  -4  -4  -5 1583.42    5.37   0
  -4   0  13   -1.26    0.75   0
  -4  10 -13    0.14    0.65   0
  -3   9 -12   -0.21    0.89   0
  -2   9 -11  106.29    1.60   0
  -1  -1   7  181.05    1.68   0
  -1   1  -5   54.84    1.32   0
  -1   7  -9   28.05    2.05   0
   0   2   8    0.17    0.79   0
   0   3   9   -0.65    0.96   0
   0   8  -8   14.42    1.35   0
   0  19 -11    0.89    0.86   0
   1   4   7   49.92    1.16   0
   1   8  -6    7.75    0.98   0
   1  14  13   -0.72    0.74   0
   2  14  11   -0.50    0.86   0
   2  15  -7   39.64    1.35   0
   2  18  12    0.17    0.83   0
   2  20  -8    4.88    1.03   0
   3  12   7   16.25    1.18   0
   3  14  -4    1.23    1.20   0
   3  22  -6   59.09    1.72   0
   3  23  -6    0.63    1.02   0
   3  25  -6    2.80    1.04   0
   3  26  -6   14.73    1.30   0
 -11 -10  -3    0.16    1.13   0
 -11  -5  -9    2.97    0.89   0
 -10  -6  -8   68.53    1.52   0
 -10  -2 -11    3.12    0.83   0
  -8  -9  -3  112.72    2.32   0
  -8  -9   7   76.25    1.51   0
  -8  -7  -6    1.78    0.86   0
  -8  -7  10    4.37    0.88   0
  -8  -6  11    0.06    0.82   0
  -8  -5  -8    0.92    0.99   0
  -8  -5  12   13.57    0.95   0
  -8   1 -12    5.00    0.91   0
  -7  -3  -9   18.98    1.05   0
  -7  -3  13   -0.41    0.84   0
  -7   0 -11   -0.26    0.89   0
  -7   2 -12   -1.31    0.94   0
  -6  -8   6    2.35    1.21   0
  -6  -7   8    2.00    1.01   0
  -6   1 -11   -0.07    0.90   0
  -6   3 -12   19.73    0.98   0
  -5  -6  -4  493.47    3.42   0
  -5  -6   8   60.74    1.35   0
  -5  -1  -9    1.17    1.12   0
  -5  -1  13   10.35    0.91   0
  -5   7 -13    0.77    0.81   0
  -4  -6  -2   24.15    1.44   0
  -4  -6   6   53.95    1.29   0
  -4  -1  12   61.31    1.19   0
  -4   2 -10   13.67    1.04   0
  -4   2  14   14.99    0.90   0
  -4   4 -11    6.20    0.94   0
  -4   4  15    0.38    0.81   0
  -4  13 -14    0.82    0.82   0
  -3   2  13   14.85    0.90   0
  -3   4 -10  213.26    2.08   0
  -3   6  15    3.54    0.86   0
  -2  -4   1  830.48    8.66   0
  -2  -4   3  578.63    4.77   0
  -2  -2   8   -0.16    0.60   0
  -2  -1  -5 1732.03    5.86   0
  -2   0  -6 2692.21    6.63   0
  -2   1  11    3.64    0.87   0
  -2   4  13   18.21    0.93   0
  -2   6  14    9.93    0.85   0
  -2  12 -12    5.52    0.97   0
  -2  17 -13   -3.01    1.17   0
  -1   0  -4 7331.28   13.00   0
  -1   0   8  132.53    1.48   0
  -1   2  -6   29.28    1.05   0
  -1   2  10    3.84    0.96   0
  -1   5  -8  207.82    1.86   0
  -1   9 -10   -0.92    0.98   0
  -1   9  14   28.63    0.98   0
  -1  12 -11   53.95    1.29   0
   0   0   4   67.03    1.58   0
   0   6  -7  318.14    2.26   0
   0   6  11  104.24    1.41   0
   0  10  13    0.35    0.81   0
   0  13 -10   -2.81    1.03   0
   0  13  14   -0.31    0.72   0
   0  18 -11    5.73    1.04   0
   1   5   8  205.91    1.91   0
   1  12  -8   18.12    1.26   0
   1  15  -9   86.69    1.52   0
   1  15  13    1.82    0.77   0
   1  21 -10    0.78    0.89   0
   1  22 -10   12.13    1.11   0
   2   6  -1  313.69    5.62   0
   2   6   5  192.45    2.09   0
   2  10   9  139.45    1.69   0
   2  12  -6   15.98    1.49   0
   2  12  10   11.09    0.93   0
   2  19  -8   52.19    1.48   0
   2  19  12    8.75    0.91   0
   3  14   8    1.51    0.92   0
   3  16  -5    3.33    1.34   0
   3  16   9    6.19    0.84   0
   3  20  10    3.14    0.77   0
   3  21  -6   56.79    1.72   0
   3  21  10   10.62    0.92   0
   4  23  -3    2.67    1.22   0
 -12  -9  -5    9.63    1.03   0
 -11 -11   3   14.12    1.72   0
 -10  -5  -9    2.80    0.81   0
  -9  -9  -4  135.32    2.15   0
  -9   0 -12    0.62    0.85   0
  -8  -4  -9    3.39    1.08   0
  -8  -1 -11    0.42    0.95   0
  -8   3 -13    0.61    0.72   0
  -7  -7   9   -0.13    0.91   0
  -7   4 -13    4.29    0.66   0
  -6  -2  13   25.92    0.93   0
  -6   5 -13   -0.28    0.83   0
  -5  -7   6    1.64    0.99   0
  -5   2 -11   29.83    0.97   0
  -4  -4   9   39.13    1.19   0
  -4  -3  10   10.79    1.02   0
  -4  -2  11    1.76    0.82   0
  -4   6 -12    1.17    0.98   0
  -3  -5   5    0.88    0.94   0
  -3  -4   7   79.46    1.30   0
  -3   2  -9  326.29    2.24   0
  -3   4  14   13.43    0.74   0
  -2  -3   6  327.56    2.36   0
  -2  -2  -4  115.92    1.97   0
  -2   0  10 1058.48    3.60   0
  -2   1  -7  848.14    3.61   0
  -2   4  -9   62.60    1.31   0
  -2   6 -10  255.78    2.16   0
  -2   9  15   11.47    0.84   0
  -2  16 -13    8.25    1.01   0
  -1  -2   4  730.82    4.19   0
  -1   1   9    2.99    0.75   0
  -1   5  12   22.62    0.77   0
  -1   7  13   23.68    0.92   0
  -1  16 -12    2.05    0.98   0
   0   1   6    0.07    0.80   0
   0   8  12   18.19    0.75   0
   0  14  14    0.35    0.82   0
   0  17 -11    0.61    0.98   0
   1   3   5  432.78    2.95   0
   1   5  -4  170.21    2.21   0
   1   8  10   38.84    1.20   0
   1  10  11   25.64    0.99   0
   1  12  12   34.05    0.92   0
   1  16  13    1.09    0.79   0
   1  20 -10   24.57    1.16   0
   2   9   8  464.80    2.74   0
   2  10  -5   15.28    1.02   0
   2  15  11    1.75    0.73   0
   2  18  -8   76.22    1.65   0
   3  17   9   18.85    1.02   0
   3  20  -6   36.17    1.47   0
   3  22  10    2.45    0.81   0
   4  22  -3   -1.05    1.37   0
   4  26  -3    1.83    1.30   0
 -11  -9  -5    0.16    0.92   0
 -10 -10   6   27.12    1.25   0
 -10  -9   8    8.08    0.98   0
  -9 -10  -2    5.38    1.42   0
  -9 -10   5   13.48    1.27   0
  -9  -8   9    1.43    0.78   0
  -9  -2 -11   12.60    0.90   0
  -8 -10   3   14.10    1.50   0
  -8  -8  -5   30.57    1.36   0
  -7  -9   5    2.81    1.10   0
  -7  -6  10   -0.04    0.86   0
  -7  -5  11   -0.20    0.83   0
  -7  -4  12   22.20    0.83   0
  -7  -2 -10    9.50    1.04   0
  -6  -6   9   81.13    1.35   0
  -6  -3  12   21.13    0.88   0
  -6  -1 -10    7.41    0.70   0
  -6   0  14    0.48    0.84   0
  -5  -5   9   17.13    1.04   0
  -5  -2  12    6.35    0.74   0
  -5   0 -10    7.79    0.95   0
  -5   1  14    7.80    0.66   0
  -5   3  15   12.61    0.84   0
  -5   4 -12   -0.46    0.76   0
  -4  -5  -4  171.00    2.18   0
  -4   0  -9    0.04    1.24   0
  -4   1  13    1.99    0.83   0
  -4  12 -14   -0.52    1.03   0
  -3  -2  -6    4.08    0.94   0
  -3  -1  -7    1.83    0.83   0
  -3   1  12   24.25    0.74   0
  -3   7  15    2.42    0.79   0
  -3   8 -12    6.06    0.79   0
  -3  11 -13   47.91    1.25   0
  -2  -4   2  143.30    2.67   0
  -2   3  12   33.65    0.94   0
  -2   7  14   31.36    1.07   0
  -2   8 -11  110.23    1.34   0
  -2  11 -12   56.57    1.12   0
  -2  15 -13   28.14    1.12   0
  -1   3  -7  121.09    1.47   0
  -1  10  14    2.92    0.77   0
  -1  11 -11   27.30    1.06   0
  -1  15 -12    0.58    1.01   0
   0   3  -5    0.73    0.97   0
   0  11  13    0.21    0.72   0
   0  12 -10  387.93    2.55   0
   0  16 -11   14.02    0.99   0
   1   4  -3  172.65    2.51   0
   1   6  -5   40.02    1.23   0
   1   9  -7   23.20    1.12   0
   1  11  -8   -0.23    0.98   0
   1  13  12   22.72    0.97   0
   1  14  -9    4.50    1.26   0
   1  17  13    2.86    0.85   0
   1  19 -10   -0.10    1.04   0
   2   7   6  345.06    2.48   0
   2   8   7    0.42    0.83   0
   2  13  10   41.23    1.06   0
   2  14  -7   61.84    1.62   0
   2  16  11   17.44    0.94   0
   3  13   7   93.26    1.83   0
   3  19  -6   27.66    1.28   0
   4  18   5    0.03    0.90   0
   4  20   6   -0.36    0.69   0
   4  27  -3   -0.04    1.46   0
 -12 -11   3    1.10    1.19   0
 -11 -11   1    3.14    2.01   0
 -11 -11   2    0.49    1.43   0
 -11  -9   8    9.22    1.01   0
 -10 -10  -3    1.34    1.21   0
 -10  -4 -10   28.20    1.09   0
  -9  -7  -7   80.30    1.53   0
  -9  -7  10    5.36    0.82   0
  -9  -6  -8    3.18    0.94   0
  -9  -6  11    0.88    0.86   0
  -9  -5  -9   40.79    1.09   0
  -9  -5  12   22.90    0.94   0
  -8  -8   8    1.20    1.01   0
  -8  -3  13    0.24    0.88   0
  -8   2 -13    9.00    0.90   0
  -7  -8  -4    7.22    1.14   0
  -7  -8   7   40.93    1.22   0
  -7   1 -12    3.25    0.94   0
  -6  -5  -7   20.94    1.12   0
  -6  -5  10    8.44    0.80   0
  -6  -4  11    0.31    0.81   0
  -6   2 -12   -0.16    0.82   0
  -6   7 -14   -0.96    0.98   0
  -5   6 -13    1.68    0.72   0
  -5   9 -14    2.03    0.73   0
  -4   3 -11   72.57    1.28   0
  -4   3  14    7.71    0.76   0
  -4   5  15   -0.90    0.65   0
  -4   8 -13    0.23    0.70   0
  -4  11 -14   14.60    1.01   0
  -3  -3  -5  209.97    2.10   0
  -3  -3   8   75.58    1.34   0
  -3   0  -8  355.76    2.34   0
  -3   0  11   -0.45    0.95   0
  -3   3 -10   78.22    1.50   0
  -3   5  14   45.94    1.14   0
  -2   2  -8    1.02    0.73   0
  -2   5  13    7.55    0.71   0
  -2  10  15    0.67    0.74   0
  -1  -1   6   67.52    1.19   0
  -1   4  11   41.72    0.94   0
  -1   6  -9   55.08    1.16   0
  -1   8 -10   38.90    1.34   0
  -1   8  13    5.60    0.91   0
   0   0   3    0.05    0.91   0
   0   2  -4 2216.15    7.28   0
   0   2   7   57.55    1.18   0
   0   4  -6  511.24    2.94   0
   0   4   9   -0.30    1.01   0
   0   7  -8   -0.04    0.94   0
   0   7  11   -0.77    0.93   0
   0   9  -9   -0.24    1.12   0
   0  15  14   -0.57    0.57   0
   1   7  -6   78.38    1.42   0
   1   7   9   56.43    1.29   0
   1  18 -10    4.68    0.99   0
   2  11   9    4.10    0.92   0
   2  17  -8   -1.59    0.93   0
   2  17  11    8.66    0.90   0
   3  15   8   37.14    1.08   0
   3  18  -6    3.47    1.16   0
   3  18   9    3.94    0.75   0
   4  21   6    0.33    0.68   0
   4  22   6    3.38    0.88   0
   4  26   6    1.65    1.24   0
 -11 -10   6   11.42    1.06   0
 -10  -9  -5    3.44    1.04   0
 -10  -8   9   57.18    1.32   0
  -9  -9   7   10.93    0.96   0
  -8 -10   2  116.96    3.02   0
  -8  -9   6   43.52    1.29   0
  -8   0 -12  130.15    1.54   0
  -7  -5  -8    1.73    0.88   0
  -7  -2  13    1.05    0.82   0
  -7  -1 -11    0.38    0.93   0
  -6  -8   5   58.73    1.72   0
  -6  -6  -6   61.75    1.73   0
  -6  -4  -8   14.95    1.18   0
  -6  -1  13   17.99    0.91   0
  -6   0 -11    0.77    1.01   0
  -5  -4  -7  108.64    1.67   0
  -5   0  13   -1.03    0.65   0
  -5   4  15    0.61    0.84   0
  -4  -6   5  153.62    1.90   0
  -4  -5   7   75.22    1.36   0
  -4   1 -10    0.56    0.97   0
  -4   5 -12   71.15    1.21   0
  -3  -2   9  343.06    2.22   0
  -3   7 -12   45.24    1.23   0
  -3   8  15    0.32    0.87   0
  -3  14 -14    2.01    0.98   0
  -2  -2   7  749.69    3.23   0
  -2   2  11  102.90    1.28   0
  -2   5 -10  259.00    2.06   0
  -2   7 -11  140.78    1.59   0
  -2   8  14    7.66    0.87   0
  -2  11  15    3.66    0.84   0
  -1  -2   3 4336.42   11.68   0
  -1  -1  -3 3787.11   10.64   0
  -1   3  10   -0.33    0.97   0
  -1   4  -8  130.81    1.59   0
  -1   6  12   35.69    0.81   0
  -1  11  14   25.49    0.89   0
  -1  14 -12    8.39    0.77   0
   0  12  13   -0.46    0.76   0
   0  15 -11   -0.81    0.76   0
   1   4   6    0.85    0.80   0
   1   6   8   30.93    1.04   0
   1   9  10    1.72    0.91   0
   1  11  11   25.29    0.97   0
   1  14  12    8.11    0.80   0
   1  17 -10   24.90    1.17   0
   2   6   4  123.75    1.89   0
   2  11  -6  272.17    2.40   0
   2  13  -7  337.32    2.72   0
   2  14  10   92.58    1.44   0
   2  16  -8    0.42    0.86   0
   2  18  11    1.36    0.82   0
   2  23  -9   20.04    1.09   0
   2  24  -9    2.53    0.88   0
   3  12   6  119.15    2.00   0
   3  13  -4  409.12    3.46   0
   3  19   9    7.38    0.81   0
   4  17   4    0.29    0.90   0
   4  20  -3    1.08    1.02   0
   4  23   6   -0.97    0.82   0
   4  24   6    0.01    0.97   0
   4  25   6    1.96    0.97   0
 -12 -11   2   35.55    2.28   0
 -12 -10   6    0.84    0.81   0
 -11  -7  -8   12.26    1.08   0
 -10  -7  10   -0.56    0.88   0
 -10  -3 -11    5.52    0.90   0
  -9  -8  -6    4.56    1.04   0
  -9  -4 -10    3.20    0.87   0
  -9  -1 -12   24.36    1.08   0
  -8 -10   1   45.53    3.22   0
  -8  -7   9   46.08    1.21   0
  -8  -5  11   17.82    0.95   0
  -8  -4  12   36.87    1.05   0
  -8  -2 -11    5.85    0.99   0
  -7  -9  -2   12.09    1.53   0
  -7  -6  -7    2.56    1.00   0
  -6  -7   7   87.73    1.66   0
  -6  -3  -9    9.60    0.78   0
  -6   6 -14   -1.37    0.97   0
  -5  -7   5   95.35    1.73   0
  -5  -6   7   14.39    1.12   0
  -5  -5  -6   49.10    1.33   0
  -5  -1  12    0.62    0.88   0
  -5   1 -11    3.36    0.82   0
  -5   2  14    7.71    0.64   0
  -5   3 -12   18.12    0.85   0
  -5   5 -13   15.05    1.09   0
  -5   8 -14    5.57    0.71   0
  -4  -3  -7   16.92    1.00   0
  -4  -1  11   27.30    1.05   0
  -4   2  13   29.28    1.01   0
  -4   6  15    6.02    0.80   0
  -4  10 -14   15.59    1.07   0
  -3  -5   4   48.71    1.35   0
  -3   1  -9  321.98    2.29   0
  -3  13 -14    7.73    0.94   0
  -2   1  10  220.11    1.85   0
  -2   3  -9  119.65    1.61   0
  -2   4  12    1.44    0.74   0
  -2   6  13    6.42    0.93   0
  -2  13 -13   26.93    0.92   0
  -1   0   7    1.14    0.86   0
  -1   9  13   -1.52    0.85   0
  -1  12  14   -0.78    0.78   0
  -1  18 -13    0.73    0.81   0
   0   5  -7   -0.72    0.86   0
   0   6  10  588.71    2.79   0
   0  10  12   44.65    1.19   0
   0  11 -10    0.27    0.73   0
   0  13  13   -0.94    0.76   0
   0  20 -12    2.05    1.05   0
   1   3   4  336.38    2.94   0
   1   5   7   62.56    1.09   0
   1  10  -8   60.07    1.40   0
   1  15  12    1.84    0.87   0
   1  16 -10    5.87    0.98   0
   2   7  -3  599.98    4.29   0
   2   8  -4    2.62    0.92   0
   2  12   9   31.14    1.13   0
   2  19  11    4.38    0.85   0
   2  21  -9   22.77    1.18   0
   2  22  -9   13.81    1.12   0
   3  14   7   54.78    1.34   0
   3  16   8   29.79    1.00   0
   3  17  -6  147.54    2.21   0
   3  20   9   15.38    0.96   0
   3  21   9   -0.49    0.89   0
   3  24  -7    2.56    1.10   0
   3  25  -7    1.77    1.11   0
 -12 -10  -4   13.91    1.34   0
 -12  -8  -7    3.26    0.82   0
 -11  -8  -7    1.52    0.94   0
 -11  -6  -9    6.52    0.93   0
 -10 -10   5    3.07    1.14   0
  -9  -3 -11   21.24    0.98   0
  -8  -6  -8   52.67    1.30   0
  -8  -6  10   58.89    1.15   0
  -8   1 -13    6.37    0.89   0
  -7  -9   4  377.81    3.34   0
  -7  -7  -6    7.69    1.15   0
  -7  -7   8   26.54    1.08   0
  -7  -3  12   -0.28    0.77   0
  -7   0 -12   25.54    1.03   0
  -7   0  14   12.78    0.75   0
  -7   2 -13    0.85    0.82   0
  -6  -2 -10   -1.45    0.90   0
  -6  -2  12    0.39    0.81   0
  -4  -4  -6    1.27    0.91   0
  -4  -4   8  225.91    1.93   0
  -4  -2  -8  504.32    2.88   0
  -4   4  14    5.99    0.67   0
  -3  -4  -4   81.28    1.61   0
  -3   4 -11    2.23    0.90   0
  -3   4  13    7.79    0.81   0
  -3   6  14   19.62    0.78   0
  -3   9 -13   11.81    1.02   0
  -3   9  15   12.55    1.02   0
  -2  -3   5  233.39    2.29   0
  -2  -1   8  335.46    2.15   0
  -2   0   9   -0.55    0.73   0
  -2   9 -12    6.12    1.01   0
  -2   9  14   44.36    1.06   0
  -2  12 -13   12.17    0.94   0
  -1   1   8 1234.76    3.87   0
  -1   5  11   35.12    1.05   0
  -1   7  12    5.52    0.93   0
  -1  17 -13    2.46    0.92   0
   0   0   2 6417.31   16.50   0
   0   1   5   -0.14    0.95   0
   0   8  -9  205.67    1.97   0
   0   8  11  321.07    2.06   0
   0  18 -12   97.10    1.57   0
   0  19 -12   -0.42    1.05   0
   1   8  -7   36.28    1.19   0
   1  12  -9   39.92    1.27   0
   1  12  11   50.29    1.15   0
   1  22 -11    1.80    0.83   0
   2   7   5  166.28    1.98   0
   2   9  -5   -0.57    1.00   0
   2   9   7   58.17    1.32   0
   2  15  -8   53.61    1.39   0
   2  15  10    0.34    0.81   0
   2  20  -9   -0.98    0.98   0
   2  20  11    2.52    0.85   0
   3  17   8    1.76    0.85   0
   3  22  -7   -0.09    1.05   0
   3  22   9    5.01    0.86   0
   3  23  -7    1.02    0.94   0
   3  26  -7    2.47    0.86   0
 -11 -10  -4    9.04    1.28   0
 -10  -9   7    7.04    0.99   0
 -10  -7  -8    1.11    0.85   0
 -10  -6  -9    6.02    0.96   0
  -9 -10   4   36.15    1.49   0
  -9  -8   8    6.42    0.91   0
  -9  -4  12    5.11    0.88   0
  -8  -7  -7  167.62    1.93   0
  -8  -5  -9   53.10    1.33   0
  -8  -2  13   11.37    0.93   0
  -8  -1 -12    3.49    0.93   0
  -7  -6   9    7.11    0.93   0
  -7  -4  11   72.85    1.22   0
  -6  -7  -5  424.98    3.22   0
  -6  -6   8   26.74    1.22   0
  -6  -3  11   20.29    1.03   0
  -6   1 -12   30.52    1.10   0
  -6   3 -13  128.90    1.46   0
  -5  -7  -3   78.04    1.74   0
  -5  -6  -5   51.46    1.32   0
  -5  -5   8    4.31    1.03   0
  -5  -2  11   30.74    0.92   0
  -5  -1 -10    3.22    0.97   0
  -5   1  13   10.03    0.91   0
  -5   3  14    1.64    0.84   0
  -5   5  15    4.91    0.75   0
  -5   7 -14    1.95    0.72   0
  -4  -3   9  196.56    1.71   0
  -4  -1  -9    4.35    1.07   0
  -4   2 -11   -0.07    0.91   0
  -4   6 -13   33.00    1.04   0
  -4   7  15   73.40    1.19   0
  -4   9 -14    2.10    0.89   0
  -3   1  11  125.60    1.46   0
  -3   6 -12   78.61    1.22   0
  -3  12 -14   16.93    0.88   0
  -2  -3  -3 1027.80    5.93   0
  -2  -1  -6  566.33    3.14   0
  -2   0  -7   -2.93    1.06   0
  -2   3  11   59.15    1.20   0
  -2   4 -10  125.66    1.62   0
  -2   6 -11   32.58    1.17   0
  -1  -1   5   53.81    1.33   0
  -1   1  -6   67.69    1.35   0
  -1   2  -7  312.58    2.21   0
  -1   9 -11   56.78    1.27   0
  -1  10  13   30.58    0.99   0
  -1  13  14    2.02    0.73   0
  -1  16 -13    2.53    0.85   0
   0   1  -3    1.65    0.84   0
   0   5   9   -0.68    0.99   0
   0   6  -8  125.52    1.55   0
   0  10 -10  369.36    2.41   0
   0  13 -11    0.97    1.04   0
   0  14  13   14.24    0.85   0
   0  17 -12    1.35    0.87   0
   1  10  10   -0.05    0.65   0
   1  15 -10    3.05    1.08   0
   1  16  12    3.13    0.64   0
   1  20 -11   27.24    1.16   0
   1  21 -11    5.89    1.12   0
   2   8   6    5.35    0.85   0
   2  12  -7   19.44    1.19   0
   2  13   9    0.68    0.87   0
   2  16  10  103.61    1.56   0
   2  19  -9    1.22    0.93   0
   2  21  11    2.62    0.78   0
   3  14  -5   14.06    1.19   0
   3  20  -7   15.45    1.29   0
   3  21  -7   11.87    1.09   0
   4  18   4    1.95    0.82   0
   4  21   5   -0.64    0.85   0
 -12  -9  -6    1.07    0.95   0
 -10  -8  -7   -0.18    0.77   0
 -10  -5 -10   10.94    0.95   0
  -9  -9  -5    3.31    1.09   0
  -9  -7   9   10.76    0.95   0
  -9  -5  11    4.92    0.90   0
  -8  -9  -4   10.84    1.31   0
  -8  -8   7  168.33    1.96   0
  -8  -4 -10    8.03    0.95   0
  -7  -8   6    2.53    0.97   0
  -7  -2 -11   33.09    1.13   0
  -7  -1  13    1.26    0.70   0
  -6  -8  -3   59.76    1.76   0
  -6  -5   9   21.22    1.10   0
  -6  -4  10   16.74    0.98   0
  -6  -1 -11    1.15    0.96   0
  -6   0  13    0.65    0.71   0
  -6   2  14    1.64    0.84   0
  -6   5 -14   40.89    1.03   0
  -5  -4   9    4.13    1.04   0
  -5  -3  10   -1.02    0.79   0
  -5   2 -12    6.57    1.02   0
  -5   4 -13    1.12    0.92   0
  -4   1  12   60.12    1.04   0
  -4   3  13   32.41    1.03   0
  -4   5  14   -1.51    0.81   0
  -3  -5  -2    1.36    1.31   0
  -3   3  12    2.79    0.90   0
  -3   7  14   11.89    0.82   0
  -3   8 -13   -0.36    0.86   0
  -3  10  15    1.29    0.73   0
  -3  11 -14   29.22    1.17   0
  -2   1  -8  359.12    2.27   0
  -2   5  12    5.63    0.79   0
  -2   7  13    0.22    0.63   0
  -2  10  14    2.00    0.84   0
  -2  11 -13    1.30    0.97   0
  -1  -2   2   47.73    1.57   0
  -1   0  -5    0.85    0.91   0
  -1   3  -8  174.21    1.73   0
  -1   4  10   38.79    1.15   0
  -1  14  14   -1.02    0.81   0
  -1  15 -13   -0.08    0.79   0
   0   2   6  811.95    3.62   0
   0   4   8    5.20    0.91   0
   0  15  13    0.42    0.80   0
   1   3  -2   44.33    1.59   0
   1   5  -5   25.37    1.08   0
   1   7   8   17.01    1.03   0
   1  13  11   18.70    0.96   0
   1  14 -10   70.53    1.40   0
   1  17  12   17.68    0.89   0
   1  19 -11   20.73    1.09   0
   2  10  -6  379.33    3.11   0
   2  11   8    0.73    0.87   0
   2  14  -8    2.80    1.00   0
   2  18  -9   91.31    1.63   0
   3  11  -3    7.65    1.04   0
   3  15   7    4.69    0.85   0
   3  16  -6   52.79    1.49   0
   3  18   8    4.87    0.85   0
   4  17  -2    3.35    1.51   0
   4  22   5    3.18    0.90   0
   4  23  -4    1.68    0.96   0
   4  24  -4    0.67    1.02   0
   4  25  -4    4.87    1.19   0
   4  26   5    7.60    1.47   0
 -11 -10   5    3.09    1.02   0
 -11  -9  -6   32.26    1.24   0
 -11  -9   7    4.03    0.81   0
 -10  -8   8    0.46    0.95   0
 -10  -4 -11    4.26    0.87   0
  -9  -9   6   28.83    1.31   0
  -9  -6  -9   -0.73    0.78   0
  -9  -6  10    0.62    0.75   0
  -8  -9   5   12.41    1.13   0
  -8  -8  -6    7.67    1.15   0
  -8  -3 -11   -0.71    0.95   0
  -8  -3  12    1.89    0.79   0
  -7   1 -13    1.11    0.73   0
  -7   1  14   10.37    0.86   0
  -7   3 -14    4.38    0.83   0
  -6  -8   4    7.69    1.33   0
  -5   0 -11   -0.36    0.82   0
  -5   0  12    3.51    0.91   0
  -5   6 -14   21.58    1.05   0
  -4  -6  -3   24.26    1.25   0
  -4  -6   4  143.59    2.00   0
  -4  -5   6  332.52    2.36   0
  -4   0 -10    0.99    0.75   0
  -4   8 -14   -1.11    0.87   0
  -4   8  15   38.32    1.11   0
  -3  -5   3  150.95    2.31   0
  -3  -3   7   27.68    0.84   0
  -3  -2  -7   21.91    0.81   0
  -3  -1  -8   34.06    1.20   0
  -3  -1   9  325.53    2.20   0
  -3   5 -12   71.92    1.29   0
  -3   5  13    0.84    0.65   0
  -2  -2  -5 1519.72    5.58   0
  -2  -2   6  595.67    3.17   0
  -2   2  -9   94.84    1.49   0
  -2  14 -14    4.52    0.90   0
  -1   6 -10   -2.91    1.18   0
  -1   6  11    8.04    1.03   0
  -1   8 -11  317.51    2.15   0
  -1   8  12   -0.36    0.62   0
  -1  11 -12   50.16    1.08   0
  -1  11  13    2.36    0.85   0
   0   3  -6   -0.94    0.85   0
   0   3   7    0.37    0.80   0
   0   7  10   -0.28    0.79   0
   0   9  11   -0.46    0.63   0
   0  12 -11  240.19    2.05   0
   0  12  12   40.40    1.08   0
   0  16 -12    7.60    0.75   0
   0  16  13    4.58    0.88   0
   1   4   5   -0.33    0.56   0
   1   6  -6   96.66    1.56   0
   1   6   7   25.93    0.95   0
   1   9  -8   16.66    0.94   0
   1   9   9  253.84    2.04   0
   1  11  -9   10.87    1.19   0
   1  11  10    5.40    0.93   0
   1  14  11   17.11    1.03   0
   1  18 -11    4.77    1.00   0
   1  18  12    0.99    0.82   0
   2  17  -9   59.03    1.53   0
   2  17  10   98.79    1.48   0
   3  11   4   43.02    1.30   0
   3  12  -4  122.00    4.28   0
   3  19  -7    0.20    0.98   0
   3  19   8    4.63    0.87   0
   4  16  -1    1.49    1.68   0
   4  16   1    1.70    1.67   0
   4  19   4   -0.02    0.80   0
   4  22  -4    3.96    1.12   0
   4  23   5   15.34    1.24   0
   4  24   5    2.90    1.02   0
   4  26  -4    0.41    1.16   0
 -12 -10   5   -0.41    0.95   0
 -10  -5  11    3.55    0.85   0
  -9 -10  -3   52.04    1.86   0
  -9  -7  -8   18.83    1.03   0
  -9  -5 -10    1.55    0.88   0
  -8  -7   8  106.21    1.76   0
  -8  -4  11    4.63    0.87   0
  -8   0 -13   -1.16    0.89   0
  -7  -9   3  206.00    2.85   0
  -7  -8  -5    3.81    1.01   0
  -7  -2  12   -0.89    0.78   0
  -7  -1 -12    1.31    0.83   0
  -6  -7   6   83.04    1.55   0
  -6  -5  -8  727.42    3.57   0
  -6  -4  -9  105.33    1.74   0
  -6  -1  12   32.78    0.96   0
  -6   0 -12    2.73    0.87   0
  -6   2 -13   27.90    0.88   0
  -6   4 -14   13.01    0.98   0
  -5  -7   4   89.06    1.75   0
  -5  -6   6  387.55    2.77   0
  -5  -4  -8   26.84    1.20   0
  -5  -3  -9   37.94    1.25   0
  -5   2  13    0.90    0.85   0
  -5   4  14   25.04    0.95   0
  -4   0  11   -0.55    0.63   0
  -4   3 -12   18.51    0.86   0
  -4   5 -13    0.67    0.89   0
  -3  -3  -6    6.90    0.71   0
  -3  -2   8   33.18    0.98   0
  -3   0  -9    1.13    0.79   0
  -3   3 -11   12.15    0.86   0
  -3   8  14    0.73    0.77   0
  -3  10 -14    8.86    0.98   0
  -2   8  13   11.46    0.83   0
  -2  10 -13    8.69    0.99   0
  -2  11  14    1.38    0.83   0
  -1   0   6   64.33    1.26   0
  -1   3   9  308.39    2.05   0
  -1   4  -9  112.84    1.56   0
  -1  14 -13   -0.51    0.92   0
  -1  15  14   25.27    0.85   0
   0   2  -5 2356.47    6.63   0
   0   4  -7  430.90    2.66   0
   0   7  -9    0.21    0.79   0
   0   9 -10    0.16    0.75   0
   0  15 -12   -2.03    0.98   0
   0  17  13   -0.14    0.87   0
   1   3   3  123.24    2.23   0
   1   4  -4  503.18    3.58   0
   1   7  -7   18.78    1.08   0
   1  13 -10   17.69    0.99   0
   1  17 -11   44.53    1.26   0
   1  19  12   23.23    1.02   0
   1  20  12   30.57    1.08   0
   2  10   7   18.32    1.08   0
   2  11  -7   14.14    1.02   0
   2  14   9   19.56    0.95   0
   2  18  10    2.89    0.89   0
   3  15  -6   12.35    1.15   0
   3  18  -7   -1.11    1.11   0
   4  18  -3    8.28    1.25   0
   4  21  -4    0.08    1.06   0
   4  27  -4    0.12    1.13   0
 -11 -11  -1    3.21    2.07   0
 -11  -8   8    2.39    0.81   0
 -10 -10  -4    9.28    1.20   0
 -10  -9  -6   14.03    1.01   0
 -10  -7   9    1.36    0.76   0
 -10  -6  10   -0.08    0.72   0
  -9  -8  -7   31.14    1.16   0
  -9  -4 -11    0.52    0.87   0
  -9  -3  12    0.98    0.87   0
  -8 -10  -1   42.09    3.12   0
  -8  -6   9   12.72    0.97   0
  -8  -5  10   28.80    1.03   0
  -8  -2 -12    1.92    0.88   0
  -8  -1  13    4.74    0.86   0
  -7  -7   7  133.15    1.72   0
  -7  -6  -8   12.96    1.00   0
  -7  -5  -9    1.23    0.83   0
  -7  -4 -10    9.75    0.95   0
  -7  -3  11   72.73    1.26   0
  -7   0  13    1.03    0.80   0
  -6  -6  -7   68.65    1.48   0
  -6  -3 -10   -0.38    0.99   0
  -6   1  13   17.38    0.91   0
  -6   3  14    0.27    0.82   0
  -5  -5  -7    0.23    0.95   0
  -5  -2 -10   47.28    1.17   0
  -5  -1  11    2.67    0.80   0
  -5   1 -12    0.44    0.95   0
  -5   3 -13   20.37    0.83   0
  -5   5 -14    0.90    0.78   0
  -4  -4   7  555.09    2.94   0
  -4  -1  10    1.87    0.97   0
  -4   1 -11   23.61    0.86   0
  -4   2  12    4.82    0.92   0
  -4   6  14    8.82    0.65   0
  -4   7 -14    0.28    0.88   0
  -3  -4   5   93.73    1.57   0
  -3   1 -10   76.65    1.40   0
  -3   2  11   69.59    1.10   0
  -3   6  13    4.52    0.83   0
  -2  -3   4  214.54    2.44   0
  -2  -1   7  842.06    3.47   0
  -2   0   8  193.46    1.74   0
  -2   3 -10    6.98    1.09   0
  -2   4  11   79.92    1.17   0
  -2   6  12    2.25    0.79   0
  -2   7 -12    8.76    0.73   0
  -2  13 -14    0.42    0.94   0
  -1  -2  -1  270.91    4.90   0
  -1  -1  -4  859.27    4.62   0
  -1   1   7  187.34    1.75   0
  -1   2   8    0.29    0.57   0
  -1   9  12    6.81    0.95   0
  -1  10 -12    7.19    0.79   0
  -1  12  13   16.56    0.98   0
  -1  13 -13   29.21    1.04   0
   0   1   4    1.37    1.08   0
   0   5  -8   -1.38    0.93   0
   0  10  11   17.55    0.89   0
   0  11 -11   -0.78    0.88   0
   0  13  12    0.51    0.75   0
   0  14 -12    3.72    0.92   0
   0  18  13    1.72    0.80   0
   1  12  10    1.32    0.91   0
   1  15  11   34.29    1.01   0
   1  16 -11    6.01    0.95   0
   2   8  -5  482.80    3.15   0
   2  13  -8   48.92    1.48   0
   2  15   9   50.97    1.16   0
   2  16  -9   -1.15    1.00   0
   2  19  10    2.15    0.86   0
   2  21 -10   31.81    1.20   0
   2  22 -10    1.20    1.07   0
   2  23 -10    2.00    0.97   0
   3  13  -5   59.58    1.59   0
   4  20  -4   -0.01    1.06   0
   4  20   4    0.66    0.85   0
 -11  -8  -8    1.24    0.97   0
 -11  -7  -9   12.50    0.93   0
 -11  -7   9   12.29    0.93   0
 -10 -10   4   10.72    1.31   0
 -10  -9   6   15.74    1.14   0
  -9 -10   3   51.32    1.83   0
  -9  -8   7   32.33    1.26   0
  -9  -3 -12   -0.39    0.80   0
  -8  -6  -9   12.87    0.92   0
  -7  -9  -3  190.16    2.75   0
  -7  -7  -7  122.72    1.75   0
  -7  -3 -11   68.89    1.29   0
  -7   2 -14   -0.36    0.79   0
  -7   2  14    0.52    0.60   0
  -6  -2 -11   -1.17    0.97   0
  -6  -2  11    0.47    0.82   0
  -4  -4  -7  508.34    2.95   0
  -4  -3   8   11.97    1.04   0
  -4  -2  -9   38.82    1.29   0
  -4  -2   9   37.25    1.18   0
  -3   4 -12  110.99    1.50   0
  -3   4  12  112.77    1.29   0
  -3   9 -14   -0.45    0.91   0
  -3   9  14    0.26    0.72   0
  -2   9 -13    2.33    0.95   0
  -2   9  13    3.44    0.87   0
  -2  12 -14   15.93    0.98   0
  -2  12  14   11.46    0.73   0
  -1   5 -10    7.41    0.98   0
  -1   5  10    5.68    0.74   0
  -1   7 -11   72.99    1.39   0
  -1   7  11   71.03    1.22   0
   0   8 -10   40.92    1.25   0
   0   8  10   40.98    1.03   0
   0  18 -13    3.11    0.89   0
   1   8  -8    3.59    1.15   0
   1   8   8    5.06    0.94   0
   1  10  -9   36.60    1.06   0
   1  10   9   36.34    1.17   0
   1  16  11    7.96    0.89   0
   2   7  -4   40.12    1.28   0
   2   7   4   39.12    1.28   0
   2   8   5  476.05    3.11   0
   2   9  -6   11.27    0.96   0
   2   9   6   12.90    0.85   0
   2  15  -9   52.87    1.22   0
   2  20 -10    8.26    1.08   0
   2  20  10    6.46    0.88   0
   2  21  10   28.37    1.13   0
   3  17  -7   13.99    1.07   0
   3  22  -8    0.46    0.81   0
   3  23  -8    1.00    0.98   0
   3  24  -8    0.38    0.97   0
   3  24   8   -0.16    0.80   0
   3  25  -8    4.54    0.95   0
   3  25   8    3.81    0.83   0
   4  27   4    0.54    1.60   0
 -12 -11  -2   34.80    2.25   0
 -12 -10  -5   -0.08    1.01   0
 -11 -10  -5    4.17    1.00   0
 -10  -7  -9    2.05    0.87   0
 -10  -6 -10    0.71    0.82   0
  -9  -4  11    0.89    0.76   0
  -8  -7  -8   98.62    1.68   0
  -8  -5 -10   21.80    1.20   0
  -8  -4 -11    3.22    0.89   0
  -8  -2  12    2.21    0.74   0
  -8  -1 -13    7.89    0.99   0
  -7  -6   8   16.52    1.01   0
  -7  -5   9   -0.13    1.17   0
  -7   0 -13    0.79    0.60   0
  -6  -6   7   73.36    1.45   0
  -6  -3  10    2.15    0.86   0
  -6   1 -13   14.90    0.74   0
  -6   3 -14    0.86    0.68   0
  -5  -7  -4   82.66    1.61   0
  -5  -6  -6  347.37    2.86   0
  -5  -5   7    0.71    0.94   0
  -5  -3   9   39.78    1.25   0
  -5  -2  10   50.65    1.01   0
  -5  -1 -11    1.22    0.82   0
  -5   1  12   -0.26    0.82   0
  -5   3  13   25.42    0.98   0
  -5   5  14    0.45    0.63   0
  -4  -1 -10    1.00    1.04   0
  -4   1  11   28.07    1.02   0
  -4   4 -13   53.28    1.10   0
  -4   6 -14    9.68    0.86   0
  -4   7  14   -1.42    0.70   0
  -3  -4  -5   87.79    1.42   0
  -3   1  10   72.02    1.28   0
  -3   2 -11   72.23    1.37   0
  -3   6 -13    3.13    0.67   0
  -2  -3  -4  202.28    2.39   0
  -2  -1  -7  814.51    3.47   0
  -2   0  -8  185.08    1.79   0
  -2   3  10    2.72    1.05   0
  -2   4 -11   78.91    1.39   0
  -2   6 -12    1.85    0.94   0
  -2   7  12    7.47    0.92   0
  -2  13  14   -0.26    0.82   0
  -1  -2   1  279.83    4.81   0
  -1  -1   4  882.97    4.62   0
  -1   1  -7  182.80    1.79   0
  -1   2  -8    0.40    0.89   0
  -1  10  12    5.87    0.97   0
  -1  13  13   26.10    0.82   0
   0   1  -4   -0.07    1.03   0
   0   5   8   -0.07    0.82   0
   0   6  -9   31.27    1.21   0
   0  10 -11   14.39    1.03   0
   0  11  11    0.61    0.80   0
   0  13 -12    1.13    0.95   0
   0  14  12    3.37    0.65   0
   0  17 -13   -0.12    0.88   0
   1  12 -10    2.27    0.75   0
   1  13  10   18.34    0.97   0
   1  15 -11   35.37    1.22   0
   1  20 -12   26.92    1.19   0
   2  12  -8  101.60    1.75   0
   2  13   8   46.89    1.39   0
   2  16   9   -0.26    0.87   0
   2  19 -10    3.18    0.95   0
   2  22  10    3.25    0.82   0
   2  23  10    1.26    0.83   0
   3  14  -6    2.00    1.04   0
   3  20  -8    2.06    1.04   0
   3  21  -8    2.72    1.04   0
   4  17   2    4.07    1.47   0
   4  19  -4    0.66    1.04   0
   4  21   4   -0.39    0.87   0
 -11  -9  -7    5.19    1.02   0
 -11  -9   6   36.37    1.39   0
 -10  -8  -8    0.76    0.87   0
 -10  -5 -11    2.67    0.85   0
  -9  -9  -6   26.33    1.36   0
  -9  -7   8   17.46    1.01   0
  -9  -6   9    1.00    0.94   0
  -9  -5  10    2.94    0.83   0
  -8  -9  -5   13.71    1.30   0
  -8  -8   6    7.49    1.12   0
  -8   0  13   -0.04    0.89   0
  -7  -8   5    4.26    1.01   0
  -7  -2 -12   -0.40    0.88   0
  -7  -1  12    3.21    0.79   0
  -7   3  14    0.30    0.86   0
  -6  -8  -4    8.32    1.13   0
  -6  -7  -6   79.47    1.55   0
  -6  -5   8  773.65    3.46   0
  -6  -4   9   89.21    1.37   0
  -6  -1 -12   32.91    1.08   0
  -6   0  12    2.67    0.61   0
  -6   2  13   27.78    1.00   0
  -6   4  14    9.25    0.83   0
  -5  -4   8   27.02    1.10   0
  -5   2 -13    0.17    0.67   0
  -5   4 -14   23.42    1.01   0
  -4   0 -11   -1.27    0.85   0
  -4   3  12   18.80    1.01   0
  -4   5  13    0.68    0.75   0
  -3  -5  -3  145.01    2.36   0
  -3  -3   6    8.40    0.92   0
  -3   0   9    0.63    1.01   0
  -3   3  11    2.25    0.86   0
  -3   7  13   55.13    1.03   0
  -3   8 -14    1.73    0.91   0
  -3  10  14    9.96    0.81   0
  -2   1  -9   58.40    1.17   0
  -2   5  11   33.67    1.06   0
  -2   8 -13   10.12    0.98   0
  -2  10  13    6.49    0.90   0
  -2  11 -14    0.54    0.95   0
  -2  14  14    2.23    0.86   0
  -1   0  -6   62.52    1.28   0
  -1   3  -9  314.92    2.26   0
  -1   4   9  108.34    1.64   0
  -1  15 -14   28.67    1.10   0
   0   2   5 2408.53    6.52   0
   0   4   7  457.90    2.58   0
   0   7   9    0.06    0.96   0
   0   9  10   -1.28    1.02   0
   0  15  12   -1.08    0.76   0
   0  16 -13    4.62    0.91   0
   1   3  -3  127.22    2.22   0
   1   4   4  520.69    3.60   0
   1   5  -6    3.94    0.95   0
   1   7   7   19.14    0.93   0
   1  14 -11   18.09    1.00   0
   1  17  11   39.74    1.03   0
   2  10  -7   20.14    1.16   0
   2  14  -9   20.42    1.12   0
   2  18 -10    5.61    1.05   0
   3  11  -4   45.04    1.39   0
   3  11   3    8.06    1.05   0
   3  12   4   96.97    1.90   0
   3  16  -7   57.51    1.43   0
   4  22   4    3.68    0.91   0
   4  23  -5   17.00    1.34   0
   4  23   4    0.32    0.99   0
   4  24  -5    3.17    1.08   0
   4  25   4    5.07    1.37   0
   4  26  -5    8.82    1.49   0
   4  26   4    0.41    1.26   0
 -12  -9   6    2.55    0.92   0
 -11 -11  -2    0.23    1.51   0
 -11 -10   4    8.75    1.17   0
 -10  -8   7    0.94    0.96   0
 -10  -4  11    1.29    0.79   0
  -9  -9   5    2.44    1.08   0
  -9  -7  -9    9.69    0.88   0
  -9  -6 -10    0.05    0.84   0
  -9  -2  12   11.64    0.95   0
  -8  -9   4   10.05    1.20   0
  -8  -8  -7  151.37    1.87   0
  -8  -3 -12    5.96    0.90   0
  -8  -3  11    1.33    0.79   0
  -7  -8  -6    0.98    1.72   0
  -7   1  13    1.53    0.60   0
  -6  -8   3   62.24    1.78   0
  -6   2 -14    0.60    0.81   0
  -5   0 -12    1.87    0.75   0
  -5   0  11   -1.10    0.76   0
  -4  -6  -4  141.86    2.07   0
  -4  -6   3   24.99    1.22   0
  -4  -5  -6  320.40    2.43   0
  -4  -5   5   97.09    1.56   0
  -4   3 -13   29.11    1.02   0
  -4   8 -15   43.95    1.21   0
  -4   8  14   -0.38    0.79   0
  -3  -3  -7   27.00    0.99   0
  -3  -2   7   23.45    0.98   0
  -3  -1  -9  305.17    2.12   0
  -3  -1   8   39.24    1.13   0
  -3   0 -10   78.20    1.37   0
  -3   3 -12    4.99    0.79   0
  -3   5 -13    0.76    0.84   0
  -3   5  12   67.29    1.08   0
  -2  -2  -6  580.07    3.18   0
  -2  -2   5 1553.38    5.45   0
  -2   2   9   96.47    1.44   0
  -1   6 -11    6.72    1.01   0
  -1   6  10   -0.68    0.87   0
  -1   8 -12   -0.20    0.91   0
  -1   8  11  315.17    1.98   0
  -1  11 -13   -0.66    0.68   0
  -1  11  12   51.07    1.19   0
  -1  15  13   -0.05    0.81   0
   0   3  -7    0.29    0.86   0
   0   3   6    0.15    0.54   0
   0   7 -10   -0.98    1.07   0
   0   9 -11    1.07    0.85   0
   0  12 -12   38.22    1.00   0
   0  12  11  234.40    1.91   0
   0  16  12    8.34    0.89   0
   1   4  -5   -0.25    0.87   0
   1   6  -7   24.66    0.83   0
   1   6   6   98.44    1.49   0
   1   9  -9  251.96    2.05   0
   1   9   8   15.30    1.10   0
   1  11   9   10.12    1.07   0
   1  14  10   75.06    1.33   0
   1  18 -12    1.28    1.02   0
   1  18  11    3.88    0.81   0
   1  19  11   19.79    1.04   0
   2  14   8    1.98    1.00   0
   2  17 -10  110.24    1.63   0
   2  17   9   52.79    1.30   0
   3  12  -5   99.69    1.77   0
   3  19  -8    2.40    1.27   0
   4  21  -5   -0.13    0.96   0
   4  22  -5    5.21    1.11   0
   4  24   4   -0.09    1.01   0
 -12 -10   4   12.16    1.19   0
 -10 -10  -5    2.05    0.98   0
 -10  -9  -7    6.92    1.05   0
  -9 -10  -4   35.59    1.54   0
  -9  -5 -11    5.25    0.87   0
  -8 -10  -2  111.39    2.90   0
  -8  -4  10    5.68    0.95   0
  -7  -5 -10   68.90    1.42   0
  -7  -2  11   34.84    1.02   0
  -7  -1 -13    2.20    0.85   0
  -6  -7   5  420.16    3.09   0
  -6  -5  -9   22.67    1.08   0
  -6  -4 -10    9.35    0.87   0
  -6  -1  11    0.13    0.91   0
  -6   0 -13    1.05    0.84   0
  -6   5  14   44.73    1.15   0
  -5  -6   5   52.38    1.42   0
  -5  -4  -9    3.32    1.33   0
  -5   3 -14    2.07    0.78   0
  -5   4  13    1.98    0.83   0
  -4   1 -12   57.16    1.20   0
  -4   5 -14    0.06    0.66   0
  -3   7 -14   12.15    0.96   0
  -3   8  13   -0.29    0.74   0
  -3  11  14   31.57    0.90   0
  -2   1   8  366.24    2.29   0
  -2   5 -12    5.70    0.88   0
  -2   7 -13    0.15    0.84   0
  -2   8  12   22.60    0.97   0
  -2  10 -14    3.68    0.71   0
  -2  11  13    1.22    0.83   0
  -1  -2  -2   46.41    1.58   0
  -1   0   5    0.44    0.88   0
  -1   3   8  181.16    1.62   0
  -1   4 -10  200.51    1.97   0
  -1  10 -13   27.88    1.03   0
  -1  14 -14    0.60    0.71   0
   0   2  -6  845.34    3.79   0
   0   4  -8    4.92    0.73   0
   0  15 -13   -1.19    0.68   0
   0  17  12   -0.80    0.87   0
   1   5   5   25.01    0.87   0
   1   7  -8   17.37    1.15   0
   1  13 -11   20.08    1.15   0
   1  20  11   29.54    1.10   0
   2   6  -3   17.63    1.22   0
   2  10   6  425.05    2.83   0
   2  11  -8    1.35    1.04   0
   2  13  -9   -0.12    0.89   0
   2  16 -10  105.45    1.65   0
   2  18   9   88.16    1.51   0
   3  13  -6    3.18    0.95   0
   3  15  -7    3.69    1.06   0
   3  18  -8    5.14    1.02   0
   4  18  -4    1.72    0.92   0
 -11  -8   7    1.30    0.85   0
 -10  -7   8    0.64    0.78   0
 -10  -6   9    5.20    0.82   0
  -9  -8  -8    5.92    0.91   0
  -9  -4 -12    5.83    0.92   0
  -9  -3  11   24.79    1.02   0
  -8  -7   7  159.57    1.83   0
  -8  -6   8   58.58    1.33   0
  -8  -5   9   53.12    1.44   0
  -8  -2 -13    8.68    0.76   0
  -8  -1  12    4.94    0.79   0
  -8   1  13    7.45    0.94   0
  -7  -9  -4  355.72    3.40   0
  -7  -9   2   12.68    1.50   0
  -7  -7   6    7.83    1.25   0
  -7  -6  -9    4.79    0.94   0
  -7  -4 -11   76.40    1.37   0
  -7   0  12   29.79    1.04   0
  -7   4  14    0.20    0.71   0
  -6  -6  -8   23.74    1.19   0
  -6  -3 -11   18.30    0.85   0
  -6   1  12   36.51    1.04   0
  -6   3  13  139.48    1.53   0
  -5  -7   3   81.18    1.72   0
  -5  -5  -8    4.73    1.03   0
  -5  -2 -11   29.27    1.00   0
  -5  -1  10    2.15    0.94   0
  -5   1 -13    9.17    0.98   0
  -5   5 -15    2.51    0.95   0
  -5   7  14    1.56    0.86   0
  -4  -3  -9  185.43    1.84   0
  -4  -1   9    1.97    1.10   0
  -4   2  11    0.12    0.85   0
  -4   4  12    4.27    0.90   0
  -4   6  13   32.50    0.87   0
  -4   7 -15   80.23    1.45   0
  -4   9  14    0.12    0.72   0
  -3   1 -11  113.55    1.62   0
  -3   6  12   85.30    1.36   0
  -2  -3   3 1175.88    5.71   0
  -2  -1   6  577.50    3.00   0
  -2   0   7   -0.39    0.85   0
  -2   3 -11  117.11    1.65   0
  -2   4  10  115.51    1.35   0
  -2   6  11   30.71    1.00   0
  -1  -1  -5   52.41    1.16   0
  -1   1   6   65.50    1.26   0
  -1   9  11   53.11    1.19   0
  -1  13 -14    1.08    0.96   0
  -1  16  13    1.57    0.61   0
   0   1   3    2.16    0.98   0
   0   5  -9   12.21    1.09   0
   0   6   8  127.29    1.54   0
   0  10  10  341.87    2.26   0
   0  11 -12   56.55    1.09   0
   0  13  11    0.17    0.91   0
   0  14 -13   15.08    1.05   0
   0  18  12   98.18    1.50   0
   1  10 -10   -0.20    1.02   0
   1  12   9   38.94    1.20   0
   1  15  10    2.34    0.94   0
   1  16 -12    2.83    0.98   0
   1  21  11    5.72    0.86   0
   2   7  -5  164.86    1.96   0
   2   8  -6    1.93    0.99   0
   2  12   7   18.56    1.05   0
   2  19   9    0.43    0.86   0
   2  21 -11    3.09    1.08   0
   3  17  -8    1.08    1.07   0
   3  22   7    0.21    1.05   0
   3  23  -9    1.30    1.16   0
   3  26   7    3.30    1.05   0
   4  20   3    1.68    0.86   0
 -12 -11  -3    0.52    1.21   0
 -12 -10  -6    0.48    0.92   0
 -12  -8   7    1.74    0.72   0
 -11  -8  -9   15.07    0.89   0
 -11  -7   8   10.49    0.97   0
 -11  -6   9    7.54    0.91   0
  -8  -6 -10   59.50    1.28   0
  -8  -5 -11   17.34    0.93   0
  -7  -7  -8   24.37    1.12   0
  -7  -3 -12    0.19    0.91   0
  -7  -3  10    0.39    0.66   0
  -7   0 -14   12.23    0.89   0
  -7   2  13   -0.66    0.69   0
  -6  -2 -12    1.01    0.88   0
  -6   1 -14    1.79    0.83   0
  -5  -7  -5   90.50    1.64   0
  -5  -1 -12   -0.83    0.85   0
  -4  -4  -8  203.47    1.93   0
  -4  -4   6    0.91    0.78   0
  -4  -2 -10   13.19    0.83   0
  -4  -2   8  518.75    2.70   0
  -4  -1 -11   25.50    0.98   0
  -4   4 -14    6.56    0.85   0
  -3  -4  -6   13.28    0.98   0
  -3  -4   4   84.72    1.61   0
  -3   4 -13    8.92    0.99   0
  -3   4  11    2.35    0.68   0
  -3   6 -14   19.12    0.93   0
  -3   9 -15   13.47    0.86   0
  -3   9  13   12.34    0.94   0
  -2  -3  -5  252.80    2.30   0
  -2   0  -9   -1.03    0.98   0
  -2   9 -14   41.61    1.05   0
  -2   9  12    7.08    0.97   0
  -2  12  13   12.45    0.71   0
  -1   1  -8 1206.91    4.15   0
  -1   5   9   45.92    1.05   0
  -1   7 -12    5.65    0.96   0
  -1   7  10  106.33    1.54   0
  -1  12 -14    0.77    0.83   0
  -1  17  13    1.32    0.65   0
   0   1  -5    0.42    1.01   0
   0   8 -11  332.24    2.19   0
   0   8   9  193.75    1.68   0
   0  19  12    0.27    0.92   0
   1   8  -9   22.89    1.16   0
   1   8   7   36.11    1.09   0
   1  12 -11   56.75    1.33   0
   1  15 -12    1.83    0.85   0
   1  16  10    5.43    0.92   0
   2   9  -7   49.01    1.40   0
   2   9   5    3.74    0.95   0
   2  15 -10    0.60    1.05   0
   2  15   8   50.43    1.22   0
   2  19 -11    1.74    1.00   0
   2  20 -11    3.83    1.00   0
   2  20   9    0.08    0.88   0
   2  21   9   20.34    1.18   0
   3  14  -7   53.34    1.57   0
   3  21  -9   -0.06    1.11   0
   3  22  -9    4.36    1.04   0
   3  23   7    1.27    0.87   0
   3  24   7    1.00    0.97   0
   3  25   7    0.79    0.99   0
 -11 -10  -6    8.63    1.13   0
 -10 -10   3    0.32    1.03   0
 -10  -9   5    4.16    1.02   0
 -10  -8  -9   41.41    1.43   0
 -10  -7 -10    1.17    0.85   0
 -10  -3  11    6.72    0.91   0
  -9 -10   2    4.74    1.48   0
  -9  -9  -7    7.65    1.10   0
  -9  -8   6    5.90    0.96   0
  -9  -4  10    2.09    0.84   0
  -9  -1  12   23.25    1.06   0
  -8  -9  -6   45.39    1.43   0
  -8  -7  -9   43.47    1.25   0
  -8  -4 -12   38.78    1.15   0
  -8  -2  11    5.93    0.91   0
  -7  -6   7    2.41    1.00   0
  -7  -5   8    1.20    0.88   0
  -7  -4   9    5.84    0.82   0
  -6  -8  -5   55.48    1.52   0
  -6  -7  -7   85.76    1.74   0
  -6  -6   6   65.35    1.52   0
  -6  -1 -13   17.71    0.90   0
  -6   6  14   -0.82    0.65   0
  -5  -6  -7   13.54    1.13   0
  -5  -5   6   53.78    1.29   0
  -5  -2   9   47.36    1.23   0
  -5   2 -14    7.34    0.81   0
  -5   4 -15    0.59    0.82   0
  -5   5  13   17.63    0.77   0
  -5   8  14    2.36    0.91   0
  -4  -3   7   17.72    0.81   0
  -4   2 -13   26.60    0.88   0
  -4   6 -15    3.97    1.00   0
  -4   7  13   23.42    0.94   0
  -4  10  14   14.26    0.86   0
  -3  -5  -4   47.77    1.35   0
  -3   1   9  321.36    2.17   0
  -3   2 -12   53.74    1.29   0
  -3  13  14    6.39    0.72   0
  -2  -1  -8  354.23    2.44   0
  -2   1 -10  226.27    1.97   0
  -2   3   9  122.97    1.56   0
  -2   6 -13    7.83    0.98   0
  -2  13  13   28.78    0.98   0
  -1   0  -7   -0.06    0.96   0
  -1   2  -9    8.42    0.83   0
  -1   9 -13    0.79    0.68   0
  -1  10  11   24.57    1.02   0
  -1  13  12   19.73    0.97   0
   0   5   7   -0.12    0.80   0
   0   6 -10  574.43    2.94   0
   0  10 -12   42.78    1.07   0
   0  11  10   -0.43    0.99   0
   0  13 -13    0.36    0.68   0
   0  14  11   28.14    1.04   0
   0  20  12    1.32    0.83   0
   1   3  -4  325.47    2.97   0
   1   5  -7   59.47    1.28   0
   1  10   8   61.37    1.20   0
   2  10  -8   12.12    1.14   0
   2  12  -9   31.06    1.33   0
   2  16   8    0.81    0.83   0
   2  18 -11    2.82    0.86   0
   2  22   9   15.14    1.03   0
   2  23   9   23.15    1.12   0
   2  24   9    1.98    0.90   0
   3  13   4  434.25    3.57   0
   3  16  -8   32.19    1.14   0
   3  20  -9   19.06    1.19   0
   4  17  -4    0.42    0.92   0
   4  23  -6   -0.53    1.08   0
   4  24  -6    0.38    1.08   0
   4  25  -6    0.33    1.11   0
   4  27   3   -0.01    1.56   0
  -9  -7   7   79.07    1.60   0
  -8 -10  -3   13.21    1.48   0
  -8  -3 -13   -0.91    0.81   0
  -7  -8   4    8.06    1.33   0
  -7  -2 -13    0.05    0.60   0
  -7  -1  11    1.44    0.81   0
  -6  -5   7   20.20    1.19   0
  -6  -4   8   18.82    1.21   0
  -6   0  11    0.19    0.82   0
  -6   4  13    6.20    0.90   0
  -5  -4   7  113.20    1.60   0
  -5  -3   8   10.33    1.06   0
  -5   0 -13   -0.64    0.76   0
  -4  -6  -5  148.08    1.92   0
  -4  -5  -7   71.57    1.40   0
  -4   0 -12   51.96    1.38   0
  -4   1  10    1.44    0.71   0
  -4   5  12   76.56    1.29   0
  -3  -2  -9  357.43    2.75   0
  -3   7  12   38.86    1.09   0
  -3   8 -15    0.27    0.72   0
  -3  10  13    0.71    0.79   0
  -3  14  14    4.31    0.73   0
  -2  -2  -7  714.11    3.39   0
  -2   2 -11  103.36    1.48   0
  -2   5  10  241.78    2.05   0
  -2   7  11  135.92    1.37   0
  -2   8 -14    6.00    0.70   0
  -2  10  12    1.50    0.93   0
  -2  11 -15    2.71    0.71   0
  -1  -2  -3 4468.91   11.97   0
  -1  -1   3 3892.22   10.60   0
  -1   3 -10    0.62    1.03   0
  -1   4   8  131.04    1.48   0
   0   3  -8    0.26    0.80   0
   0  15  11   -1.43    0.89   0
   1   4  -6    1.70    0.90   0
   1   7   6   77.86    1.36   0
   1   9 -10    0.06    1.03   0
   1  13   9  264.23    2.14   0
   1  17  10   20.19    1.02   0
   2   6  -4  122.43    1.88   0
   2  11   6  282.98    2.36   0
   2  13   7  338.76    2.44   0
   2  14 -10   85.00    1.63   0
   3  12  -6  103.42    2.26   0
   3  19  -9    2.81    1.08   0
   4  22   3    0.40    0.97   0
   4  26  -6    0.50    1.21   0
   4  26   3    0.41    1.52   0
 -11  -9   5   -0.18    0.95   0
 -10 -10  -6   22.20    1.22   0
  -9  -6 -11   -1.18    0.87   0
  -9  -6   8    1.51    0.95   0
  -9  -5 -12   13.43    1.04   0
  -8  -8   5   30.19    1.25   0
  -8  -3  10    0.44    0.86   0
  -7  -1 -14   10.24    0.88   0
  -7   1  12   -0.44    0.79   0
  -7   3  13    0.50    0.61   0
  -6  -4 -11    1.25    0.98   0
  -6   2  12   -0.56    0.59   0
  -6   7  14   -1.73    0.78   0
  -5  -4 -10   33.25    1.13   0
  -5  -3 -11    0.78    0.74   0
  -5   0  10    7.10    0.99   0
  -5   6  13    1.33    0.92   0
  -5   9  14   -0.18    0.91   0
  -4   3  11   70.86    1.07   0
  -4   5 -15    0.96    0.82   0
  -4   8  13   -0.75    0.88   0
  -3  -3  -8   66.47    1.20   0
  -3  -3   5  208.48    2.04   0
  -3   0 -11    0.58    0.97   0
  -3   0   8  369.04    2.27   0
  -3   3 -13   36.18    1.20   0
  -3   3  10   77.82    1.24   0
  -3   5  11    0.63    0.80   0
  -2  -4  -2  140.83    2.76   0
  -2   2   8   -0.25    0.93   0
  -2   5 -13    5.03    0.84   0
  -2  10 -15   -1.77    1.00   0
  -1  -1  -6   64.27    1.29   0
  -1   4 -11   42.04    1.19   0
   0   0  -3    0.69    0.94   0
   0   2  -7   54.70    1.23   0
   0   2   4 2295.95    7.21   0
   0   4  -9   -0.05    1.01   0
   0   4   6  522.38    2.91   0
   0   7 -11    0.56    0.95   0
   0   7   8    0.17    0.84   0
   0   9 -12   -0.49    0.95   0
   0   9   9   -0.84    0.92   0
   0  12  10  387.45    2.45   0
   0  15 -14    0.24    0.83   0
   1   7  -9    7.04    2.05   0
   1  11   8    0.88    0.98   0
   1  18 -13   -1.75    0.71   0
   1  18  10    1.16    0.84   0
   2  11  -9    3.82    1.01   0
   2  17   8    0.02    0.84   0
   3  13  -7   88.20    1.58   0
   3  15  -8   36.77    1.27   0
   3  18  -9    3.55    0.90   0
   4  18  -5    1.01    0.91   0
   4  21  -6    0.81    0.81   0
 -12  -9   5    7.24    0.97   0
 -10  -9  -8    9.85    0.97   0
 -10  -8   6   10.06    0.92   0
 -10  -5   9    1.53    0.89   0
  -9  -8  -9    1.53    0.89   0
  -9  -2  11   10.98    0.74   0
  -7  -9  -5    3.26    1.14   0
  -7  -6 -10    0.03    0.91   0
  -7  -5 -11    2.14    0.84   0
  -7  -4 -12   22.33    0.97   0
  -6  -6  -9   77.38    1.37   0
  -6  -3 -12   21.50    1.01   0
  -6  -1  10    9.51    0.91   0
  -6   0 -14   -0.70    0.62   0
  -5  -5  -9   16.06    1.06   0
  -5  -2 -12    5.74    0.90   0
  -5   1 -14    4.79    0.81   0
  -5   3 -15   16.08    1.05   0
  -5   4  12    2.09    0.94   0
  -4  -5   4  179.82    2.12   0
  -4  -3 -10   11.13    1.07   0
  -4   0   9    0.00    1.05   0
  -4   1 -13   -0.44    0.64   0
  -4  12  14    1.08    0.76   0
  -3  -2   6    2.51    0.89   0
  -3  -1   7    2.45    0.81   0
  -3   1 -12   27.40    0.98   0
  -3   7 -15   -0.34    0.64   0
  -3   8  12    7.28    0.97   0
  -3  11  13   40.62    1.04   0
  -2   3 -12   35.68    1.07   0
  -2   7 -14   31.15    1.13   0
  -2   8  11  110.59    1.37   0
  -2  11  12   63.09    1.23   0
  -2  15  13   28.25    0.97   0
  -1   3   7  129.58    1.53   0
  -1  10 -14    4.33    0.91   0
  -1  11  11   26.05    0.86   0
  -1  15  12   -1.11    0.68   0
   0   3   5    0.71    0.65   0
   0   5 -10    0.83    1.07   0
   0  11 -13   -0.01    0.88   0
   0  14 -14   -1.41    0.90   0
   1   4   3  175.34    2.48   0
   1   6   5   43.14    1.17   0
   1  13 -12   27.74    1.04   0
   1  14   9   13.29    0.93   0
   1  17 -13    0.96    0.79   0
   1  19  10    0.25    0.80   0
   1  20  10   20.72    1.07   0
   2   7  -6  337.54    2.50   0
   2   8  -7   -0.56    0.89   0
   2  13 -10   55.34    1.56   0
   2  14   7   64.53    1.53   0
   2  16 -11   17.45    1.10   0
   2  18   8   75.56    1.54   0
  -9   0  12    2.35    0.68   0
  -6   5  13    1.49    0.58   0
  -5   2  11   29.41    0.81   0
  -3  -4  -7   76.82    1.21   0
  -2  -3  -6  304.55    2.37   0
   0   1  -6    0.45    0.58   0
   0  17  11    1.14    0.65   0
   1  10 -11   24.67    0.87   0
   1  16 -13    0.52    0.73   0
 -12  -5   7    0.35    1.26   0
 -12   2   7    1.29    0.97   0
 -11   5   6   26.01    1.19   0
  -9   5   4  479.85    3.05   0
  -9  14   6   11.31    0.91   0
  -8   3   3   88.19    1.75   0
  -8  10   4    2.52    0.91   0
  -7 -11   3   11.59    2.89   0
  -7  16   5   23.21    1.01   0
  -6  15   4   26.40    1.09   0
  -6  20   6   12.99    0.94   0
  -5   9   2  155.67    1.76   0
  -5  19   5   -0.55    0.97   0
  -5  21   6    1.05    0.65   0
  -5  23   7    0.55    0.86   0
  -4  -7   1   26.40    3.13   0
  -4  11   2  320.42    2.38   0
  -3   7   1  570.93    3.57   0
  -3  16   3   28.66    1.26   0
  -3  23   6    1.04    0.92   0
  -2 -26   6    0.18    0.89   0
  -1  14   2  108.75    1.64   0
  -1  22   5   29.89    1.19   0
  -1  24   6    1.88    0.76   0
   0 -20   3   36.58    1.37   0
   0  10   1 2860.75    8.65   0
   0  20   4   22.78    0.91   0
   1 -20   3  125.44    1.85   0
   1  -3   0    0.26    0.34   0
   1  10   1  840.97    5.32   0
   2 -12   1  100.98    1.75   0
   3 -26   6   16.17    1.03   0
   3 -22   4    5.22    0.99   0
   3 -16   2  494.06    3.48   0
   4 -15   2  210.36    2.12   0
   6 -24   6    2.18    0.68   0
   6 -16   3    8.68    1.05   0
   6   9   2  645.69    7.05   0
   7 -14   3   21.79    1.21   0
   7   6   2   20.96    1.86   0
   7  18   5    0.03    1.44   0
   8 -21   6   -0.53    0.94   0
   9 -13   4    9.71    1.05   0
   9  -7   3   22.03    1.13   0
  10 -17   6    3.87    0.70   0
  10   6   4    0.10    1.06   0
  11  -9   5    1.33    0.92   0
  12  -8   6   -0.05    1.02   0
  12   6   6   -0.40    0.95   0
 -12  -6   7    1.14    1.24   0
 -12   4   7    1.78    0.96   0
 -11  -8   6    0.08    1.22   0
 -11   6   6    0.27    0.88   0
 -11  10   7    0.35    0.66   0
 -10   6   5    3.23    1.21   0
 -10  11   6    1.06    0.97   0
 -10  14   7    2.75    0.89   0
  -9  -8   4   20.38    1.67   0
  -9   6   4    0.90    1.10   0
  -9  11   5   16.70    1.29   0
  -9  17   7    1.85    0.81   0
  -8   4   3   30.52    1.43   0
  -8  14   5   33.72    1.21   0
  -8  19   7    9.51    0.98   0
  -7   9   3  196.96    2.03   0
  -6   6   2   18.19    1.09   0
  -6  18   5    2.60    1.00   0
  -6  22   7    1.13    0.69   0
  -5  17   4  102.98    1.54   0
  -4 -20   4   -0.02    1.14   0
  -4   5   1  829.65    4.30   0
  -4  15   3   66.38    1.22   0
  -4  18   4   -0.06    0.96   0
  -3  19   4  148.66    1.66   0
  -3  25   7    0.82    0.76   0
  -2 -24   5    1.23    0.83   0
  -2 -19   3   55.97    1.66   0
  -2  17   3    3.15    1.10   0
  -2  22   5    6.24    0.89   0
  -1  20   4   83.01    1.28   0
   0  26   7   48.58    1.27   0
   1  -2   0    1.96    0.39   0
   1  26   7   -0.48    0.80   0
   3 -24   5   23.94    1.03   0
   3 -19   3  293.13    2.41   0
   3 -11   1   26.63    1.02   0
   3  17   3  122.26    2.14   0
   4 -21   4    0.20    1.06   0
   4  19   4    0.32    0.94   0
   5 -20   4   -1.06    1.05   0
   5 -17   3    1.14    1.16   0
   6 -19   4   10.09    0.85   0
   6 -11   2  168.98    2.00   0
   7 -20   5    0.10    0.97   0
   7  -8   2   25.75    1.39   0
   8 -15   4   10.51    1.07   0
   8 -11   3   72.43    1.43   0
   9 -19   6    0.08    0.71   0
   9 -16   5    2.19    0.99   0
   9  -6   3   55.81    1.46   0
  10 -13   5   64.39    1.39   0
  10  -8   4   14.44    1.12   0
  10  14   6    0.64    1.51   0
  11 -13   6    1.39    0.86   0
  11  -8   5   30.58    1.32   0
  11   6   5    4.87    1.20   0
 -12   5   7    1.06    0.88   0
 -11  11   7   -0.89    0.98   0
  -8   5   3  107.99    1.76   0
  -8  11   4    0.47    0.93   0
  -8  17   6   28.67    0.89   0
  -7  19   6   -0.28    0.95   0
  -7  21   7    0.54    0.88   0
  -6  12   3   79.89    1.52   0
  -5  14   3    0.02    1.14   0
  -3 -25   6    1.90    1.07   0
  -3 -18   3   66.32    2.11   0
  -3  13   2   42.28    1.25   0
  -2   9   1  118.91    1.75   0
  -2  14   2   62.67    1.38   0
  -2  20   4   86.65    1.40   0
  -2  24   6   10.90    0.98   0
  -1 -26   6    8.06    0.91   0
  -1 -22   4    7.59    0.97   0
  -1 -16   2   93.84    3.41   0
  -1  10   1  819.19    4.34   0
  -1  26   7    2.32    0.92   0
   1 -12   1  119.28    1.82   0
   1  18   3   27.64    1.23   0
   2 -26   6   -0.01    0.81   0
   2 -24   5    2.25    0.95   0
   2 -22   4    1.17    0.77   0
   2 -16   2   57.35    1.64   0
   2  26   7   -0.63    0.72   0
   3  22   5    2.29    0.93   0
   3  24   6    2.35    0.88   0
   4 -25   6    4.62    0.81   0
   4 -23   5   18.84    1.10   0
   4 -18   3   14.13    0.92   0
   4  -9   1  501.08    3.17   0
   5 -13   2    1.56    0.88   0
   5  -6   1   88.57    1.73   0
   6 -21   5    1.59    0.96   0
   7 -22   6   23.58    0.97   0
   7 -17   4  150.89    1.72   0
   7 -13   3  108.73    1.71   0
   7  -7   2    0.49    1.26   0
   8 -18   5    6.22    0.75   0
   9 -12   4   32.90    1.10   0
  10 -16   6   40.15    1.01   0
  10  -7   4   18.39    1.29   0
  11  -7   5   -1.22    1.04   0
  12  -6   6   -1.32    0.99   0
 -12  -7   7    1.42    1.21   0
 -12   6   7   -0.38    0.83   0
 -10  -9   5    4.90    1.44   0
 -10   8   5    0.87    0.92   0
 -10  15   7    0.59    0.92   0
  -8  -7   3  230.63    3.41   0
  -8  15   5   50.33    1.20   0
  -7  -2   2   34.11    1.56   0
  -7  -1   2    2.84    1.11   0
  -7   0   2   99.26    1.82   0
  -7   1   2    3.37    1.29   0
  -7  10   3   88.40    1.63   0
  -7  14   4   14.74    1.03   0
  -7  17   5   23.01    1.17   0
  -6   7   2  182.65    1.80   0
  -5  10   2  316.15    2.33   0
  -5  20   5    5.66    0.99   0
  -5  24   7   44.66    1.15   0
  -4  12   2    9.84    1.07   0
  -4  21   5   -0.63    0.97   0
  -4  23   6   -0.96    0.86   0
  -3 -23   5   -0.59    0.92   0
  -3   8   1 1558.71    5.58   0
  -2  26   7   -0.92    0.76   0
  -1 -19   3    0.93    1.19   0
  -1  18   3   27.20    1.28   0
   0 -24   5   -0.15    0.87   0
   0 -16   2   97.24    2.43   0
   0  15   2    0.27    0.98   0
   0  23   5   -0.46    0.79   0
   2 -19   3   62.75    1.47   0
   2 -11   1  378.07    3.01   0
   2  10   1  201.29    3.27   0
   3 -21   4   18.25    1.15   0
   3 -15   2   32.30    1.41   0
   3 -10   1  383.23    2.97   0
   3   9   1    1.26    1.42   0
   3  20   4    8.69    1.04   0
   4 -14   2   96.86    1.69   0
   5 -24   6    1.51    0.69   0
   5 -22   5   13.96    1.06   0
   5   4   1   20.60    1.63   0
   6 -18   4   10.37    1.13   0
   6 -10   2    4.26    1.27   0
   8 -14   4    6.35    1.07   0
   9 -15   5    1.96    1.63   0
   9  -3   3  208.00    2.41   0
   9   1   3   33.61    1.77   0
   9   2   3    7.17    1.27   0
  10  -6   4    1.57    0.91   0
  11 -12   6    0.40    0.68   0
  11  -6   5    6.86    1.09   0
  12  -5   6   24.62    1.22   0
 -12   7   7    0.39    0.85   0
 -11  -9   6   37.79    1.74   0
 -11   8   6   -1.40    0.93   0
 -11  12   7    1.56    0.94   0
  -9   8   4   22.18    1.16   0
  -9  18   7    2.93    0.90   0
  -8   6   3    7.19    0.89   0
  -8  18   6    9.76    0.91   0
  -8  20   7    1.60    0.68   0
  -7 -18   5    0.16    1.74   0
  -7  -3   2  116.11    2.18   0
  -7   2   2   31.42    1.34   0
  -6   8   2   69.42    1.42   0
  -6  13   3   94.12    1.60   0
  -6  19   5    1.06    0.95   0
  -6  23   7   10.45    0.75   0
  -5 -21   5   13.87    1.27   0
  -5  -2   1  613.99    4.56   0
  -5  -1   1   27.58    1.36   0
  -5   0   1   -0.34    1.04   0
  -5   1   1   25.72    1.53   0
  -5  18   4   12.77    0.92   0
  -4 -24   6    0.25    1.06   0
  -4 -22   5   10.88    1.35   0
  -4   6   1  585.06    3.48   0
  -4  16   3   53.50    1.38   0
  -4  19   4    0.05    0.93   0
  -4  25   7   13.38    0.96   0
  -3  -9   1    1.93    1.68   0
  -3  17   3  130.60    1.69   0
  -3  22   5    2.52    0.69   0
  -3  24   6    7.24    0.89   0
  -2 -15   2    7.45    1.37   0
  -1  15   2   57.06    1.39   0
  -1  23   5    0.45    0.87   0
   0 -19   3   -0.38    1.17   0
   0  21   4   -0.29    0.91   0
   0  25   6    0.06    0.84   0
   1 -19   3    0.13    1.20   0
   1  15   2   56.66    1.52   0
   1  21   4  184.31    2.12   0
   1  23   5    0.27    0.89   0
   1  25   6    1.66    0.79   0
   2  18   3   54.28    1.87   0
   3 -25   6    5.05    0.92   0
   3 -23   5    1.53    0.89   0
   3 -18   3   68.88    1.60   0
   3  14   2   60.75    1.96   0
   4 -20   4   -1.79    0.99   0
   4  -8   1   24.06    1.31   0
   4  13   2   22.30    2.02   0
   5 -19   4    9.84    1.05   0
   5 -16   3    0.25    1.15   0
   5 -12   2  181.42    2.02   0
   5  -5   1   97.65    1.60   0
   7 -19   5    0.20    0.74   0
   7 -12   3    0.18    1.24   0
   7  -6   2   18.40    1.31   0
   7   5   2  621.04    4.59   0
   8 -17   5   23.00    0.98   0
   8  -9   3  119.46    1.77   0
   8   8   3   12.60    1.81   0
   9  -2   3    8.45    1.18   0
   9  -1   3   32.38    1.60   0
   9   0   3   -1.02    1.30   0
  10 -15   6    1.39    0.74   0
  10 -11   5    0.61    0.96   0
  10  -5   4   57.65    1.39   0
  10  -4   4   47.99    1.43   0
  11 -11   6    0.69    0.88   0
  11  -5   5    1.76    0.95   0
  11  10   6   10.02    1.35   0
  12  -4   6    0.59    0.85   0
  12  -3   6   14.80    1.12   0
  12   2   6    0.62    1.08   0
  12   3   6   11.94    1.03   0
 -12  -8   7    2.05    0.97   0
 -12   8   7    2.00    0.82   0
 -11   9   6   31.54    1.18   0
 -11  13   7    0.64    0.78   0
 -10   9   5    1.98    1.06   0
 -10  13   6    0.54    0.64   0
 -10  16   7    1.06    0.90   0
  -9  -9   4  164.26    2.79   0
  -9  13   5   12.07    1.00   0
  -9  16   6   -0.70    0.86   0
  -8   7   3  220.90    2.18   0
  -7   3   2  109.41    1.75   0
  -7  11   3   10.46    1.36   0
  -7  15   4  170.99    1.70   0
  -7  20   6    5.68    0.63   0
  -7  22   7    0.39    0.66   0
  -5 -23   6    0.98    1.06   0
  -5   2   1  604.33    3.72   0
  -5  11   2   42.98    1.29   0
  -3  14   2   58.18    1.35   0
  -3  20   4    7.76    0.69   0
  -2 -25   6   17.93    1.11   0
  -2 -21   4    0.69    0.86   0
  -2  10   1  189.69    2.14   0
  -2  23   5   29.79    1.02   0
  -1 -11   1  381.53    3.77   0
  -1  21   4  181.66    1.87   0
  -1  25   6    1.36    0.88   0
   0  11   1    0.33    1.05   0
   1 -11   1  376.15    3.13   0
   2 -21   4    1.41    0.89   0
   2 -15   2    7.28    1.12   0
   2  23   5   32.20    1.17   0
   4 -24   6    0.44    0.88   0
   4 -22   5    4.21    1.09   0
   4 -17   3   65.96    1.55   0
   5  -4   1   20.62    1.17   0
   5  21   5   17.89    1.41   0
   5  23   6    2.61    1.01   0
   6 -20   5   25.75    1.02   0
   6 -14   3   64.43    1.54   0
   6  -9   2  705.27    3.58   0
   7 -21   6   50.22    1.23   0
   7  -5   2  605.43    3.42   0
   8 -19   6    9.22    0.99   0
   8 -13   4    0.65    0.89   0
   9 -17   6   23.91    0.98   0
   9 -14   5   17.64    1.11   0
   9 -10   4   36.89    1.18   0
  10 -14   6   -0.54    0.85   0
  10  -3   4   11.27    1.13   0
  10  -2   4    0.16    1.12   0
  10   2   4    1.19    1.14   0
  10   3   4   14.27    1.12   0
  10  10   5    3.65    1.20   0
  11 -10   6    9.41    0.98   0
  11  -4   5    7.16    0.96   0
  11  -3   5    2.79    1.07   0
  11   3   5    3.30    1.02   0
  12  -2   6   -0.12    0.88   0
  12  -1   6    2.63    0.90   0
  12   0   6   17.06    1.14   0
  12   1   6    0.63    0.85   0
 -11  -2   5    7.00    1.04   0
 -11  -1   5   54.46    1.47   0
 -11   0   5   -0.31    1.02   0
 -11   1   5   56.18    1.43   0
 -11   2   5    7.73    1.08   0
 -11  10   6   10.06    0.88   0
 -10 -10   5    3.03    1.46   0
 -10  -2   4    0.12    1.17   0
 -10  -1   4  109.59    1.83   0
 -10   0   4   79.87    1.59   0
 -10   1   4  108.50    1.74   0
 -10   2   4   -0.11    0.89   0
 -10  10   5    4.61    0.97   0
 -10  14   6   -0.46    0.77   0
  -9   9   4  141.67    1.49   0
  -8   8   3   15.01    1.18   0
  -8  13   4    0.82    0.79   0
  -8  16   5    9.11    0.75   0
  -7  -4   2   78.71    1.87   0
  -7   4   2   77.33    1.55   0
  -7  18   5   -1.65    0.72   0
  -6   9   2  660.11    3.27   0
  -6  17   4   22.45    1.02   0
  -6  22   6   11.88    0.84   0
  -5  -3   1  120.15    2.28   0
  -5   3   1  113.02    1.80   0
  -5  21   5   18.46    1.03   0
  -5  23   6    0.65    0.91   0
  -4   7   1   24.16    0.94   0
  -4  13   2   21.88    1.12   0
  -4  22   5    7.28    0.90   0
  -4  24   6    0.87    0.74   0
  -3 -14   2   55.85    1.91   0
  -3   9   1    1.48    0.69   0
  -2 -23   5   31.60    1.25   0
  -2 -18   3   63.58    2.00   0
  -2  15   2    5.93    1.06   0
  -2  21   4   -0.62    0.84   0
  -2  25   6   19.44    1.00   0
  -1 -21   4  190.57    2.33   0
  -1  11   1  374.59    2.94   0
   0 -11   1   -0.55    1.15   0
   1 -21   4  186.25    2.02   0
   1  11   1  385.15    3.55   0
   2 -25   6   17.34    0.83   0
   2 -23   5   31.80    1.17   0
   2  15   2    7.16    1.08   0
   2  21   4    0.29    0.85   0
   2  25   6   18.96    1.04   0
   3 -26   7    4.35    0.84   0
   3 -14   2   57.92    1.40   0
   3  -9   1    1.11    1.01   0
   4 -13   2   20.76    1.01   0
   4  -7   1   23.80    1.21   0
   4  22   5    5.65    1.08   0
   4  24   6    0.51    0.96   0
   5 -23   6    2.11    0.86   0
   5 -21   5   17.36    0.84   0
   5 -11   2   48.48    1.42   0
   5  -3   1  112.97    1.85   0
   6 -22   6    9.42    0.73   0
   6 -17   4   23.04    0.99   0
   6  22   6    9.15    1.30   0
   7 -18   5    1.20    0.94   0
   7 -15   4  169.75    1.82   0
   7  -4   2   77.44    1.62   0
   8 -16   5   10.18    1.06   0
   8  -8   3   13.52    1.04   0
   9  -9   4  144.04    1.80   0
  10 -10   5    4.08    0.95   0
  10  -1   4  105.42    1.71   0
  10   0   4   80.94    1.64   0
  10   1   4  108.96    1.74   0
  11  -2   5    6.76    0.98   0
  11  -1   5   53.03    1.41   0
  11   0   5   -0.60    1.01   0
  11   1   5   47.06    1.42   0
  11   2   5    7.94    1.07   0
 -12  -1   6    3.46    0.96   0
 -12   0   6   17.95    1.22   0
 -12   1   6    2.94    0.89   0
 -12   2   6    1.33    0.90   0
 -11 -10   6   12.01    1.36   0
 -11  -3   5    2.01    1.12   0
 -11   3   5    2.38    1.07   0
 -11   4   5    6.95    0.93   0
 -10  -3   4   12.95    1.12   0
 -10   3   4   11.38    1.21   0
 -10   4   4   46.45    1.35   0
  -9  10   4   39.88    1.27   0
  -9  14   5   17.21    1.04   0
  -9  17   6   27.79    1.04   0
  -8  -8   3   12.05    1.74   0
  -8  19   6    8.97    0.71   0
  -7   5   2  621.82    3.32   0
  -7  12   3    1.10    1.06   0
  -7  21   6   41.54    1.08   0
  -6  14   3   55.28    1.16   0
  -6  20   5   26.13    1.06   0
  -5   4   1   20.29    1.13   0
  -4  17   3   69.33    1.48   0
  -4  20   4    0.83    0.82   0
  -3 -20   4    8.61    1.24   0
  -3  18   3   65.67    1.59   0
  -3  23   5    0.81    0.74   0
  -2 -10   1  205.75    3.52   0
  -1 -25   6    2.81    0.82   0
  -1 -23   5   -0.68    1.06   0
  -1 -15   2   56.22    1.61   0
  -1  19   3    1.24    1.03   0
   0 -25   6   -0.08    0.89   0
   0 -21   4   -0.10    0.98   0
   0  19   3    0.02    1.09   0
   1 -25   6    0.22    0.87   0
   1 -23   5    0.84    0.93   0
   1 -15   2   59.09    1.51   0
   2 -18   3   60.40    1.41   0
   2 -10   1  191.33    2.22   0
   3 -20   4    8.37    0.90   0
   4 -19   4    1.46    0.96   0
   4   7   1   24.40    2.54   0
   5 -18   4   13.68    1.04   0
   5  -2   1  571.44    3.78   0
   6 -13   3   86.62    1.67   0
   6  -8   2   77.24    1.59   0
   7 -22   7    0.73    0.89   0
   7 -20   6    4.86    0.90   0
   7 -11   3   10.71    1.02   0
   7  -3   2  113.49    1.79   0
   8 -12   4   12.10    1.07   0
   8  -7   3  212.26    2.17   0
   9 -16   6    0.85    1.00   0
   9   9   4  148.96    2.48   0
  10 -16   7   -0.24    0.77   0
  10 -13   6    0.80    0.90   0
  10  -9   5    4.04    1.06   0
  11 -13   7    0.27    0.62   0
  11  -9   6   33.11    1.10   0
  12  -8   7    1.59    0.69   0
  12   8   7    2.52    0.97   0
 -12  -3   6   14.61    1.15   0
 -12  -2   6   -0.44    1.06   0
 -12   4   6   -0.73    0.86   0
 -11  -4   5    9.59    1.17   0
 -11   5   5   -0.05    0.99   0
 -11  11   6   -0.04    0.88   0
 -10 -14   6    0.56    1.56   0
 -10  -4   4   49.04    1.53   0
 -10   5   4   56.84    1.36   0
 -10  11   5    2.59    1.02   0
 -10  15   6    2.37    0.82   0
  -9  -1   3   35.87    1.49   0
  -9   0   3   -1.15    1.36   0
  -9   1   3   39.46    1.51   0
  -9   2   3    6.36    1.27   0
  -8   9   3  119.19    1.74   0
  -8  14   4    5.55    0.92   0
  -8  17   5   24.78    1.08   0
  -7  -5   2  624.03    4.59   0
  -7   6   2   19.86    1.34   0
  -7  16   4   29.78    1.12   0
  -7  19   5   -0.13    0.96   0
  -6  -9   2  689.11    7.37   0
  -6  10   2    4.85    1.14   0
  -6  18   4   10.76    0.91   0
  -5  -4   1   21.31    1.58   0
  -5   5   1  107.39    1.75   0
  -5  12   2  168.58    1.75   0
  -5  16   3   -0.03    0.76   0
  -4   8   1    5.59    1.12   0
  -3 -24   6    4.83    1.11   0
  -3  10   1  371.99    2.78   0
  -3  21   4   24.33    1.09   0
  -3  25   6    4.78    0.68   0
  -2  11   1  385.49    2.86   0
  -1 -18   3   29.20    1.53   0
  -1  16   2  118.77    1.81   0
  -1  24   5   12.96    0.89   0
   0 -23   5    0.36    0.85   0
   0 -15   2    0.33    1.03   0
   0  16   2  115.61    1.85   0
   0  24   5   -0.35    0.82   0
   1 -18   3   28.08    1.32   0
   1  19   3    0.85    1.10   0
   2 -26   7   -0.20    0.91   0
   3 -24   6    4.83    0.81   0
   3 -22   5    2.19    0.98   0
   3 -17   3  124.00    1.78   0
   3  18   3   69.54    2.06   0
   3  23   5    0.94    0.83   0
   3  25   6    5.63    1.01   0
   4 -25   7   11.13    0.91   0
   4 -16   3   49.47    1.38   0
   4 -12   2   10.80    1.10   0
   4  -6   1  611.48    3.74   0
   4  17   3   72.38    2.21   0
   5 -24   7   50.44    1.29   0
   5  -1   1   26.13    1.26   0
   5   0   1    0.04    1.01   0
   5   1   1   26.46    1.35   0
   6 -23   7   10.56    0.95   0
   6 -21   6    0.62    0.87   0
   6 -19   5    3.80    0.91   0
   6  20   5   26.41    1.82   0
   7  -2   2   35.36    1.37   0
   7  -1   2    2.90    1.13   0
   8 -20   7   -0.01    1.00   0
   8 -18   6    7.55    0.71   0
   8 -15   5   58.23    1.42   0
   8  -6   3    8.51    1.27   0
   8   7   3  217.47    3.05   0
   9 -18   7    2.33    0.99   0
   9  -8   4   21.29    1.07   0
  11 -12   7    1.46    0.96   0
  11  -8   6    1.03    0.98   0
  11   9   6   32.46    1.47   0
  12  -7   7   -1.32    0.80   0
 -12  -4   6   -2.21    1.28   0
 -12   5   6   34.27    1.26   0
 -11  -5   5    0.22    1.03   0
 -11   6   5   10.19    1.07   0
 -10   6   4    1.59    1.05   0
 -10  12   5    2.93    0.89   0
  -9 -10   4   42.78    2.00   0
  -9  -2   3   10.06    1.29   0
  -9   3   3  251.35    2.39   0
  -9   4   3  248.00    2.38   0
  -9  11   4   57.13    1.13   0
  -9  15   5    7.69    0.99   0
  -9  18   6    7.60    0.94   0
  -8 -13   4    0.44    1.67   0
  -8  10   3   12.52    1.10   0
  -8  20   6    1.36    0.92   0
  -7   7   2    2.18    1.13   0
  -7  13   3  109.80    1.58   0
  -6  15   3   -0.36    1.08   0
  -6  23   6   33.28    1.03   0
  -5 -18   4   13.15    1.58   0
  -5 -15   3   55.80    2.96   0
  -5  22   5   16.61    1.01   0
  -5  24   6   -0.43    0.89   0
  -4 -25   7   10.15    1.12   0
  -4 -19   4    1.05    1.27   0
  -4  14   2   97.98    1.63   0
  -3 -17   3  133.71    2.54   0
  -3  15   2   31.17    1.07   0
  -2 -26   7   -0.10    0.87   0
  -2  19   3   66.44    1.43   0
  -2  24   5    3.12    0.80   0
  -1  22   4   12.70    1.02   0
  -1  26   6   11.77    0.94   0
   0 -18   3   44.72    1.47   0
   0  22   4  127.52    1.73   0
   0  26   6    5.83    0.85   0
   1 -26   7    1.18    0.92   0
   1 -10   1  846.30    4.67   0
   1  16   2  129.64    2.06   0
   1  24   5   15.12    0.99   0
   1  26   6   11.14    1.04   0
   2 -20   4   89.88    1.53   0
   2 -14   2   69.37    1.53   0
   3 -13   2   40.10    1.32   0
   3  -8   1 1618.89    6.51   0
   4 -23   6    2.10    0.89   0
   4 -21   5   -0.18    0.87   0
   4  20   4    1.00    1.12   0
   5 -22   6    8.40    0.84   0
   5 -20   5    5.39    0.74   0
   5 -10   2  305.61    2.45   0
   6 -16   4   46.02    1.08   0
   7 -17   5   32.16    1.13   0
   7 -10   3   87.01    1.46   0
   7   0   2  112.40    2.02   0
   7   1   2    3.98    1.14   0
   7  11   3   11.30    2.16   0
   8 -11   4    3.54    1.05   0
   9 -15   6   62.50    1.36   0
   9 -12   5   46.23    1.22   0
  10 -15   7    1.71    0.83   0
  10 -12   6   18.96    1.06   0
  10  -8   5    2.73    0.78   0
  10   9   5    3.33    1.28   0
  11  -7   6   22.09    1.11   0
  12  -6   7    0.67    0.83   0
  12   7   7    0.57    0.90   0
 -12  -5   6   30.73    1.41   0
 -12   6   6    0.40    0.77   0
 -12   7   6   -1.79    0.83   0
 -11  -6   5    9.52    1.34   0
 -11   7   5    3.49    0.78   0
 -10   7   4   21.12    1.19   0
 -10  16   6   47.64    1.16   0
  -9  -3   3  257.59    2.71   0
  -9   5   3   26.03    1.40   0
  -9  12   4   31.64    1.23   0
  -8  15   4   11.08    1.00   0
  -8  18   5    3.76    0.97   0
  -7 -22   7    1.07    1.26   0
  -7  17   4  160.34    1.76   0
  -7  22   6   26.46    1.04   0
  -6  11   2  170.53    1.87   0
  -6  21   5    4.23    0.69   0
  -5   6   1   86.12    1.48   0
  -5  13   2   -0.03    1.10   0
  -5  17   3    3.24    1.01   0
  -5  20   4    1.02    0.85   0
  -4   9   1  484.25    3.02   0
  -4  18   3   12.48    1.15   0
  -4  23   5   23.69    0.88   0
  -4  25   6    7.39    0.93   0
  -2  16   2   68.60    1.51   0
  -2  22   4    2.16    0.97   0
  -2  26   6    1.30    0.86   0
  -1 -26   7    0.99    0.91   0
  -1  12   1  127.27    1.92   0
   0 -26   7   56.27    1.36   0
   0  12   1 6695.01   12.59   0
   1  22   4   14.03    1.05   0
   2 -24   6   14.50    0.94   0
   2 -22   5    6.96    1.03   0
   2 -17   3    2.48    1.17   0
   2  -9   1  123.26    1.98   0
   2  11   1  394.69    4.37   0
   2  19   3   64.81    1.59   0
   3 -25   7    1.17    0.85   0
   3 -19   4  139.68    1.79   0
   3  21   4   23.16    1.20   0
   4  -5   1  824.67    4.44   0
   5 -17   4  110.27    1.61   0
   5 -14   3    0.75    0.85   0
   5  19   4   12.16    1.51   0
   6 -12   3   78.14    1.52   0
   7 -21   7   -0.76    0.78   0
   7 -19   6   -0.49    0.83   0
   7  -9   3  200.02    2.12   0
   8 -17   6   36.75    1.22   0
   8  -5   3  104.56    1.62   0
   8  16   5   11.17    2.37   0
   9 -17   7    1.11    0.93   0
  10  -7   5   36.06    1.28   0
  11 -11   7    0.34    0.80   0
  11  -6   6    0.34    1.02   0
  11   8   6   -0.95    1.15   0
  12  -5   7   -0.03    0.87   0
  12  -4   7    7.10    1.04   0
 -12   8   6    0.11    0.87   0
 -11 -11   6    0.07    1.17   0
 -11   8   5   30.87    1.00   0
 -11  13   6    2.07    0.95   0
 -10  -6   4    0.82    1.33   0
 -10   8   4   16.35    1.24   0
 -10  13   5   75.73    1.40   0
  -9 -14   5   17.35    2.02   0
  -9  -4   3  261.85    2.82   0
  -9   6   3   64.94    1.51   0
  -9  16   5    0.46    0.94   0
  -9  19   6    2.00    0.82   0
  -8  11   3   65.84    1.99   0
  -8  21   6   -1.29    0.81   0
  -7 -20   6    4.69    1.66   0
  -7  -6   2   22.17    1.78   0
  -7   8   2   26.80    1.06   0
  -7  20   5    0.07    0.70   0
  -6  19   4    9.11    1.08   0
  -5 -24   7   47.40    1.71   0
  -5   7   1  314.72    2.46   0
  -4 -23   6    0.36    1.02   0
  -4 -16   3   56.02    2.27   0
  -4  21   4   -0.17    0.69   0
  -3  11   1   26.55    1.19   0
  -3  19   3  271.57    2.08   0
  -3  26   6   14.49    0.90   0
  -2 -24   6   15.26    1.09   0
  -2 -20   4   84.88    1.70   0
  -2 -14   2   67.47    1.96   0
  -2  12   1   97.72    1.63   0
  -1 -10   1  842.45    5.69   0
  -1   2   0    2.02    0.37   0
  -1  20   3  119.94    1.67   0
   0 -10   1 2873.35    9.12   0
   1 -24   6   -0.02    0.89   0
   1 -20   4   87.13    1.53   0
   1 -14   2  104.39    1.75   0
   1  12   1  126.80    2.30   0
   2  24   5    3.19    0.91   0
   2  26   6   -0.40    0.91   0
   3 -23   6    1.74    0.93   0
   3 -16   3   29.99    1.31   0
   4 -24   7   12.45    1.02   0
   4 -18   4    2.76    0.93   0
   4 -11   2  333.88    2.48   0
   5  -9   2  164.76    2.00   0
   6 -20   6   17.33    1.01   0
   6 -18   5    1.58    0.74   0
   6 -15   4   27.01    1.25   0
   6  -6   2   20.25    1.14   0
   6   8   2   77.16    2.48   0
   7 -16   5   24.88    1.14   0
   7 -13   4   50.52    1.33   0
   8 -19   7   12.24    0.80   0
   8 -14   5   37.21    1.20   0
   8 -10   4    2.19    1.05   0
   8  -4   3   30.19    1.36   0
   8   6   3    7.93    1.30   0
   9 -11   5   14.25    1.06   0
   9  -6   4    1.24    0.76   0
   9  13   5   10.27    1.49   0
  10 -14   7    3.17    0.83   0
  10 -11   6    0.92    0.92   0
  10  -6   5   -3.83    1.54   0
  10   8   5    1.90    1.24   0
  10  13   6    0.28    0.97   0
  10  16   7    0.49    1.30   0
  11 -10   7    1.04    0.95   0
  11  -5   6   34.11    1.32   0
  12  -3   7   23.22    1.15   0
 -12  -6   6    1.98    1.21   0
 -12   9   6    2.03    0.87   0
 -11   9   5    2.39    0.95   0
 -11  14   6    5.68    0.84   0
 -10   9   4   25.12    1.21   0
 -10  17   6    2.25    0.89   0
  -9   7   3   27.60    1.21   0
  -9  13   4   11.32    1.06   0
  -8  -9   3  123.81    2.69   0
  -8  19   5    1.98    0.80   0
  -7   9   2   12.71    1.22   0
  -6 -23   7   10.12    1.32   0
  -6  12   2    2.41    1.15   0
  -6  16   3    9.14    0.80   0
  -6  22   5    1.65    0.82   0
  -6  24   6    2.55    0.89   0
  -5  -5   1  111.69    2.72   0
  -5  23   5    0.90    0.80   0
  -5  25   6   11.60    0.87   0
  -4 -21   5    0.13    1.09   0
  -4  10   1  186.32    1.98   0
  -4  15   2  193.37    1.83   0
  -3  16   2  523.49    2.96   0
  -3  22   4    4.15    0.97   0
  -2 -22   5    7.61    1.04   0
  -2  20   3    2.58    0.94   0
  -1 -24   6    0.22    0.92   0
  -1 -20   4   88.74    1.68   0
  -1   3   0    0.21    0.47   0
  -1  17   2  332.08    2.86   0
   0 -24   6   11.18    1.02   0
   0 -20   4   24.66    1.17   0
   0  17   2   -1.57    1.30   0
   0  20   3   36.42    1.28   0
   1 -22   5   27.55    1.22   0
   1 -17   3  312.82    2.77   0
   2 -25   7    4.28    0.96   0
   2  16   2   65.33    1.88   0
   2  22   4    1.76    0.97   0
   3 -21   5    8.84    0.84   0
   3  -7   1  552.30    3.66   0
   3  15   2   30.67    1.67   0
   4 -22   6    4.16    0.94   0
   4 -20   5   54.63    1.35   0
   4  -4   1  846.74    4.66   0
   5 -23   7    0.03    0.63   0
   5 -21   6    0.53    0.90   0
   5 -19   5   -0.22    0.90   0
   5 -13   3   23.51    1.32   0
   6 -11   3   10.02    1.23   0
   7  -8   3  111.11    1.81   0
   7  21   6   35.66    2.38   0
   8  -3   3   94.24    1.73   0
   8   5   3  115.17    2.26   0
   9  -5   4  481.52    3.04   0
  10 -10   6   29.29    1.18   0
  10  -5   5   -1.00    1.11   0
  11  -4   6   14.74    1.13   0
  11   7   6   20.27    1.21   0
  11  12   7    3.05    1.04   0
  12  -2   7    0.19    0.86   0
  12  -1   7    9.41    1.06   0
  12   0   7   -2.04    1.06   0
  12   3   7   22.01    1.28   0
  12   4   7    5.37    1.03   0
 -12  10   6    0.39    0.85   0
 -11  -7   5    3.93    1.09   0
 -11  10   5    6.26    0.96   0
 -10  10   4    9.05    1.00   0
 -10  14   5   29.32    0.93   0
  -9  -5   3   27.14    1.50   0
  -9   8   3    7.91    1.03   0
  -9  17   5   24.89    0.99   0
  -8  -1   2   19.76    1.65   0
  -8   0   2  300.88    2.75   0
  -8   1   2   19.42    1.41   0
  -8   2   2   13.47    1.36   0
  -8   3   2    0.21    1.27   0
  -8   4   2   -1.15    1.16   0
  -8  12   3    6.04    0.81   0
  -8  16   4    8.80    0.82   0
  -7  18   4    1.23    0.73   0
  -7  21   5    7.08    0.86   0
  -7  23   6    0.48    0.61   0
  -6 -19   5    2.95    1.55   0
  -6   0   1   -0.04    1.09   0
  -6   1   1   63.06    2.00   0
  -6   2   1   43.42    1.42   0
  -6   3   1 1888.73    6.01   0
  -5 -22   6    8.62    1.30   0
  -5   8   1  842.87    3.77   0
  -5  14   2  594.98    3.00   0
  -5  18   3   49.57    1.26   0
  -5  21   4    4.19    0.85   0
  -4  19   3   46.66    1.19   0
  -4  24   5    4.85    0.91   0
  -4  26   6    1.72    0.77   0
  -3 -25   7    0.42    0.88   0
  -2 -17   3    3.43    1.24   0
  -2  25   5    5.72    0.80   0
  -1 -22   5   29.65    1.40   0
  -1 -14   2  109.74    1.95   0
  -1  23   4    4.57    0.88   0
  -1  25   5    1.53    0.87   0
  -1  27   6    1.61    0.72   0
   0 -22   5   57.26    2.34   0
   0 -14   2    0.86    1.00   0
   0   3   0   15.71    1.33   0
   0  23   4   -0.56    0.84   0
   0  25   5    0.74    0.82   0
   0  27   6    0.11    0.75   0
   1  20   3  129.79    1.88   0
   2 -19   4   19.19    1.18   0
   2 -13   2  321.51    2.60   0
   3 -12   2  110.62    1.68   0
   4  25   6    3.01    0.97   0
   5 -16   4  376.79    2.73   0
   6  -5   2  132.57    1.71   0
   7 -20   7   11.64    0.89   0
   7 -18   6   36.40    0.98   0
   7 -12   4   26.23    1.25   0
   8 -18   7   19.53    0.98   0
   8 -16   6   73.30    1.26   0
   8 -13   5   29.21    1.11   0
   8  -9   4    9.01    1.23   0
   8  -2   3   33.89    1.47   0
   8  -1   3  187.25    2.35   0
   8  12   4   14.39    1.77   0
   9 -16   7   11.04    0.74   0
   9 -13   6   -1.15    0.99   0
   9 -10   5   11.29    0.88   0
   9  -4   4    5.80    1.25   0
   9   7   4   16.96    1.29   0
  10 -13   7   12.07    1.17   0
  10  -4   5    0.21    1.09   0
  10   7   5   34.74    1.55   0
  11  -9   7    3.95    0.84   0
  11  -3   6   14.79    1.13   0
  12   1   7   11.59    0.95   0
  12   2   7    0.94    0.86   0
 -12  -7   6   -0.32    1.11   0
 -10  -7   4   18.96    1.42   0
 -10  15   5    0.21    0.81   0
  -9  14   4    6.43    0.79   0
  -8  -2   2   13.87    1.28   0
  -8   5   2  627.43    3.31   0
  -8  13   3   67.83    1.31   0
  -7  10   2    2.70    0.86   0
  -7  15   3  223.14    1.81   0
  -6 -21   6    0.26    1.31   0
  -6  -1   1   58.34    1.66   0
  -6   4   1  642.45    3.53   0
  -6   5   1    6.42    0.99   0
  -6  13   2  111.65    1.68   0
  -6  17   3   11.41    0.94   0
  -6  20   4   17.95    1.01   0
  -5 -20   5    7.38    1.29   0
  -4  11   1  166.77    1.89   0
  -4  16   2  360.22    2.46   0
  -4  22   4    6.40    0.94   0
  -3  12   1  325.05    2.41   0
  -3  20   3   22.64    1.10   0
  -3  25   5    3.41    0.82   0
  -2   1   0 2964.45   13.10   0
  -2   2   0  646.86    5.43   0
  -2  13   1 1285.22    4.89   0
  -2  23   4    2.24    0.99   0
  -2  27   6   10.33    0.93   0
  -1 -17   3  336.92    3.02   0
  -1   4   0    0.15    0.54   0
  -1  13   1  579.04    3.38   0
   0 -17   3   -1.21    1.30   0
   0  13   1    0.24    1.04   0
   1 -25   7    1.17    0.79   0
   1  -9   1  285.96    2.97   0
   1  17   2  324.08    3.13   0
   1  25   5    2.34    0.86   0
   1  27   6   -0.26    0.92   0
   2 -23   6   28.21    1.05   0
   2 -21   5    8.53    0.98   0
   2 -16   3    1.64    1.22   0
   2  -8   1   89.84    1.79   0
   3 -24   7    2.47    0.87   0
   3 -18   4   84.52    1.58   0
   3  24   5   25.34    1.26   0
   4 -17   4   -1.84    1.09   0
   4 -14   3    0.29    1.16   0
   4 -10   2   25.35    1.18   0
   4  -3   1  102.71    2.01   0
   4  23   5   27.88    1.42   0
   5  -8   2  113.29    1.57   0
   5  24   6    0.49    0.96   0
   6 -21   7   11.41    0.95   0
   6 -19   6    5.81    0.96   0
   6 -17   5   64.86    1.19   0
   6  -4   2   66.88    1.54   0
   7 -15   5  161.56    1.77   0
   7  -7   3  214.01    2.23   0
   8   0   3    0.01    1.35   0
   8   1   3  194.82    2.41   0
   8   2   3   38.00    1.55   0
   9  -9   5    2.10    1.07   0
   9  -3   4   61.93    1.60   0
   9   6   4    1.57    1.26   0
  10  -9   6   14.65    1.05   0
  10  -3   5   41.34    1.36   0
  11  -8   7    1.41    0.93   0
  11  -2   6    4.24    0.96   0
  11  -1   6   78.89    1.58   0
 -12   0   5   -0.86    0.97   0
 -12   1   5   44.82    1.42   0
 -12   2   5   18.90    1.22   0
 -12   3   5    7.52    1.14   0
 -12   4   5    1.41    0.98   0
 -11  -8   5   37.67    1.65   0
 -11   0   4   73.09    1.60   0
 -11   1   4    0.49    1.02   0
 -11   2   4   49.59    1.53   0
 -11   3   4   84.29    1.66   0
 -11   4   4   30.14    1.21   0
 -11  12   5    1.38    0.79   0
 -10  11   4   19.05    1.15   0
  -9 -11   4   61.97    2.27   0
  -9  -6   3   67.59    1.99   0
  -9  10   3   52.87    1.25   0
  -9  15   4   17.14    1.00   0
  -9  18   5    1.29    0.93   0
  -8   6   2  239.81    2.29   0
  -8  17   4   11.17    0.80   0
  -8  20   5   69.21    1.28   0
  -7  -7   2    2.88    1.51   0
  -7  11   2  127.11    1.75   0
  -7  19   4   13.81    1.01   0
  -6  -2   1   43.13    1.74   0
  -6   6   1  173.41    1.93   0
  -6  23   5    5.20    0.80   0
  -5  15   2   24.16    1.28   0
  -5  24   5   49.22    1.13   0
  -3 -23   6    0.26    1.07   0
  -3 -19   4  145.11    2.28   0
  -3 -13   2   46.01    2.06   0
  -3  17   2    1.94    1.13   0
  -3  23   4   57.83    1.22   0
  -2 -25   7    3.76    0.86   0
  -2   3   0 5266.65   15.03   0
  -1 -25   7    2.98    0.88   0
  -1   5   0    0.78    1.06   0
   0 -25   7    0.53    0.76   0
   1 -19   4   39.74    1.33   0
   1  23   4    5.02    0.98   0
   3 -22   6   80.76    1.40   0
   3 -20   5    2.48    0.98   0
   3  -6   1  362.60    3.18   0
   3  19   3  293.25    3.10   0
   3  26   6   15.07    1.05   0
   4 -23   7    7.24    0.79   0
   5 -22   7    6.12    0.85   0
   5 -20   6   25.18    1.06   0
   5 -18   5   32.89    1.04   0
   5 -12   3  511.94    2.98   0
   5  22   5   14.90    1.23   0
   6 -10   3  116.70    1.63   0
   7 -21   8    1.63    0.77   0
   7 -17   6    2.66    0.93   0
   8 -15   6   26.11    1.06   0
   8 -12   5   35.93    1.13   0
   8  -8   4   28.05    1.34   0
   9 -17   8   14.36    0.97   0
   9 -15   7    1.08    0.82   0
   9  -2   4  120.58    1.87   0
   9  16   6    0.20    1.40   0
  10 -12   7   52.16    1.23   0
  10  -2   5   27.67    1.28   0
  10   6   5    8.25    1.22   0
  11 -11   8    1.79    0.79   0
  11   0   6    8.12    1.16   0
  11   1   6   76.52    1.67   0
  11   2   6    3.04    1.03   0
  11   3   6   12.99    1.14   0
  11   4   6   15.52    1.19   0
  11  11   7   -0.45    1.17   0
 -12  -8   6   -0.26    1.25   0
 -12  -2   5   20.71    1.36   0
 -12  -1   5   44.54    1.50   0
 -12   5   5    6.88    1.04   0
 -12   6   5    3.35    0.89   0
 -11 -12   6   -0.19    1.35   0
 -11  -1   4    1.03    1.21   0
 -11   5   4   21.31    1.24   0
 -11   6   4   30.88    1.14   0
 -10  12   4    0.28    1.00   0
 -10  16   5   21.45    1.01   0
  -8  -3   2   -0.15    1.28   0
  -8   7   2    0.23    0.87   0
  -8  14   3   47.98    1.16   0
  -7  16   3   49.44    0.99   0
  -7  22   5    1.11    0.89   0
  -6   7   1  245.09    2.21   0
  -6  14   2   78.95    1.57   0
  -6  21   4    4.63    0.83   0
  -5  10   1    1.33    0.94   0
  -5  19   3   -0.13    0.82   0
  -5  22   4  119.84    1.48   0
  -4 -24   7   11.78    1.25   0
  -4  20   3    0.97    0.82   0
  -4  25   5   23.26    0.97   0
  -3 -21   5    9.39    1.26   0
  -3  13   1   22.25    1.05   0
  -2   4   0 2513.63    9.44   0
  -2  21   3    6.95    0.98   0
  -1  18   2   -0.09    1.04   0
  -1  21   3    8.55    1.02   0
   0  -9   1    0.40    1.41   0
   0  21   3    0.62    0.97   0
   1 -23   6   14.52    0.93   0
   1 -21   5    1.67    1.00   0
   1 -13   2 1323.35    5.32   0
   1  13   1  591.18    4.19   0
   2 -24   7    2.75    0.87   0
   2  20   3    3.01    1.06   0
   2  25   5    4.80    1.05   0
   3 -25   8    4.43    0.76   0
   3 -11   2   31.69    1.22   0
   3  10   1  407.13    6.23   0
   3  22   4    3.49    1.11   0
   4 -21   6    0.34    0.81   0
   4 -19   5  122.79    1.47   0
   4  -2   1  397.78    3.50   0
   5 -15   4    1.90    1.21   0
   6 -22   8   -0.07    0.90   0
   6 -16   5   20.61    1.03   0
   6  -3   2  209.51    2.31   0
   6   7   2  234.52    3.45   0
   7 -19   7   -0.27    0.64   0
   7 -14   5    0.89    0.92   0
   7 -11   4    7.16    0.88   0
   8 -19   8    3.14    0.68   0
   8 -17   7   -0.30    0.77   0
   9  -8   5   17.68    1.04   0
   9  -1   4  281.05    2.58   0
   9   0   4  263.09    2.60   0
   9   1   4  302.02    2.88   0
  10 -14   8    6.39    0.81   0
  10  -8   6    9.52    0.77   0
  10  -1   5    4.37    1.02   0
  10   0   5   -1.12    1.11   0
  10  12   6   16.86    1.31   0
  11 -10   8   -0.51    0.87   0
  11  -7   7    4.78    0.73   0
  12  -4   8    0.56    0.91   0
 -12  -3   5   10.42    1.39   0
 -12   7   5   17.45    1.12   0
 -11  -2   4   49.84    1.58   0
 -11   7   4    0.28    1.02   0
 -11  13   5   17.69    1.07   0
 -10 -12   5    1.19    1.38   0
 -10  -8   4   15.89    1.53   0
 -10   0   3   -2.00    1.03   0
 -10   1   3   42.32    1.46   0
 -10   2   3   80.64    1.62   0
 -10   3   3   84.26    1.62   0
 -10   4   3   11.32    1.14   0
 -10   5   3   10.30    1.02   0
  -9  11   3   23.02    0.90   0
  -9  16   4   99.21    1.42   0
  -9  19   5   -0.49    0.86   0
  -8   8   2   38.94    1.13   0
  -8  18   4   16.92    0.82   0
  -8  21   5   17.76    1.00   0
  -7 -12   3   -0.04    2.41   0
  -7  12   2    5.34    1.24   0
  -7  20   4    2.56    0.76   0
  -6  -3   1 1955.76    7.89   0
  -5  16   2  179.45    1.89   0
  -4  12   1  581.87    3.09   0
  -4  17   2    8.17    1.26   0
  -4  23   4    1.22    0.86   0
  -3  21   3   33.69    1.05   0
  -2 -23   6   29.41    1.21   0
  -2 -19   4   19.19    1.27   0
  -2  -9   1  134.26    3.12   0
  -2   5   0 2076.52    8.29   0
  -2  18   2   11.84    1.15   0
  -2  26   5   16.18    0.95   0
  -1 -23   6   18.10    1.14   0
  -1   6   0    1.11    1.28   0
  -1  14   1  143.90    1.88   0
  -1  24   4    3.52    0.78   0
  -1  26   5   23.92    1.06   0
   0 -23   6   -1.33    0.90   0
   0 -19   4    0.95    1.04   0
   0   5   0    1.78    1.00   0
   0  18   2  354.45    2.75   0
   0  26   5   11.18    0.87   0
   1 -16   3   15.77    1.25   0
   2 -18   4   -0.18    1.14   0
   2 -12   2   83.11    1.61   0
   2  -7   1  813.91    4.97   0
   2  12   1  101.30    2.29   0
   2  27   6    9.72    0.92   0
   3  -5   1  476.05    3.88   0
   4 -24   8   -0.14    0.79   0
   4 -13   3   38.97    1.41   0
   4  -9   2  728.86    3.63   0
   4  14   2   95.67    3.09   0
   4  18   3   14.60    1.57   0
   4  21   4    1.29    1.10   0
   5 -23   8   16.81    0.96   0
   6 -20   7    1.50    0.91   0
   6 -18   6   -0.58    0.98   0
   6 -13   4    0.82    0.86   0
   6  -9   3  338.13    2.58   0
   6  -2   2  438.95    3.14   0
   6  23   6   27.87    1.79   0
   7  10   3   99.01    2.75   0
   7  15   4  166.86    5.58   0
   8 -11   5   16.15    0.99   0
   9 -14   7   -0.14    0.91   0
   9 -11   6   24.75    1.18   0
   9   2   4  121.61    2.00   0
   9   3   4   59.16    1.62   0
   9  12   5   47.36    1.83   0
  10 -11   7    4.17    0.77   0
  10  -7   6   32.22    1.19   0
  10   1   5    5.24    1.08   0
  10   2   5   28.00    1.28   0
  10   3   5   40.56    1.38   0
  11  -6   7    0.34    0.85   0
  12  -3   8    9.17    1.01   0
 -12   8   5    1.90    0.74   0
 -12   9   5    8.26    0.92   0
 -11  -3   4   94.11    1.87   0
 -11   8   4    1.54    1.08   0
 -11  14   5   -1.38    0.81   0
 -10  -1   3   42.40    1.46   0
 -10  13   4    1.64    0.67   0
 -10  17   5    3.99    0.87   0
  -9  -7   3   26.09    1.59   0
  -9  12   3   69.63    1.35   0
  -8  -4   2    0.67    1.40   0
  -8   9   2    3.39    1.26   0
  -8  15   3    5.89    1.03   0
  -7  17   3   28.49    1.11   0
  -7  23   5    2.72    0.91   0
  -6   8   1   11.02    0.90   0
  -6  15   2   74.67    1.42   0
  -5  -6   1   94.72    2.84   0
  -5  11   1   15.29    1.08   0
  -5  20   3  104.22    1.45   0
  -5  25   5    0.35    0.75   0
  -3 -16   3   30.26    1.68   0
  -3   2   0    0.51    1.31   0
  -3   3   0    0.31    1.22   0
  -3  18   2    2.92    1.20   0
  -3  26   5   -0.80    0.87   0
  -2 -21   5    9.47    1.07   0
  -2   6   0  254.14    2.96   0
  -2  14   1    8.12    0.77   0
  -2  24   4    0.75    0.88   0
  -1 -21   5    0.77    0.98   0
  -1 -19   4   37.88    1.34   0
  -1  -9   1  314.24    3.87   0
   0 -21   5    0.48    0.86   0
   0 -13   2    0.42    1.03   0
   0  14   1   69.63    1.53   0
   0  24   4   -0.46    0.86   0
   1 -24   7    1.16    0.89   0
   1  -8   1 1197.59    6.26   0
   1  21   3    9.67    1.04   0
   2 -25   8   14.98    1.01   0
   2 -22   6   -0.27    0.82   0
   2 -20   5  161.76    1.82   0
   2  17   2   14.63    1.68   0
   2  23   4    1.81    0.94   0
   3 -23   7    0.27    0.78   0
   3 -17   4  178.63    2.07   0
   4 -22   7   35.84    1.12   0
   4 -16   4  115.36    1.56   0
   4  -1   1  541.38    4.26   0
   5 -21   7   10.44    0.92   0
   5 -17   5   21.86    1.11   0
   5 -11   3  110.66    1.72   0
   5  -6   2  992.59    4.38   0
   6  -1   2  323.61    2.86   0
   7 -20   8    9.23    0.76   0
   7 -18   7    4.42    1.01   0
   7 -16   6    1.74    0.89   0
   7 -10   4  193.83    2.21   0
   7  -5   3    1.24    0.84   0
   8 -18   8   26.86    1.06   0
   8 -16   7    1.71    1.02   0
   8  -6   4   46.02    1.53   0
   9 -16   8   10.94    0.75   0
   9  -7   5    1.81    0.72   0
  10 -13   8    1.11    0.77   0
  10 -10   7   37.41    1.18   0
  10  -6   6   -0.49    1.03   0
  11  -9   8    6.34    0.89   0
  11  -5   7   -0.99    0.87   0
  11  10   7    1.40    1.09   0
  12  -2   8    2.49    0.87   0
  12  -1   8    0.35    0.95   0
 -12  -9   6    2.62    1.23   0
 -12  -4   5    3.76    1.12   0
 -12  10   5   -0.77    0.86   0
 -11  -9   5   -0.21    1.07   0
 -11  -4   4   26.23    1.30   0
 -11   9   4   36.71    1.31   0
 -10 -15   6    2.64    1.64   0
 -10  -2   3   82.18    1.74   0
 -10   7   3   87.04    1.42   0
 -10   8   3  158.78    1.90   0
 -10  14   4   21.08    1.12   0
  -9  17   4    0.98    0.93   0
  -9  20   5    1.57    0.96   0
  -8 -10   3   15.22    1.89   0
  -8  10   2  120.27    1.73   0
  -8  19   4    9.78    1.10   0
  -7  13   2  147.72    1.62   0
  -6   9   1  156.27    1.83   0
  -6  19   3   60.65    1.32   0
  -6  22   4    2.72    0.97   0
  -5  23   4    1.83    0.83   0
  -4 -22   6    4.66    1.08   0
  -4 -18   4    2.12    1.23   0
  -4 -12   2   11.18    1.87   0
  -4  13   1   39.08    1.28   0
  -4  21   3   18.25    1.01   0
  -3 -24   7    2.08    1.01   0
  -3   1   0    0.30    1.19   0
  -3   4   0    0.49    0.84   0
  -3   5   0   -0.09    1.30   0
  -3  14   1   95.37    1.55   0
  -3  24   4    0.14    0.63   0
  -2 -13   2  318.24    3.50   0
  -2  -1   0 3025.09   16.28   0
  -1  22   3   36.33    1.09   0
   0 -16   3   16.18    1.29   0
   1  18   2    0.31    1.10   0
   1  26   5   24.48    1.09   0
   2 -15   3   43.73    1.44   0
   3 -21   6   72.14    1.50   0
   3 -19   5  102.18    1.53   0
   3 -14   3  102.26    1.56   0
   4 -20   6    0.22    0.92   0
   4 -18   5    0.45    0.96   0
   4   0   1    1.41    1.12   0
   5 -19   6   15.24    0.83   0
   6 -12   4    5.66    1.17   0
   6   0   2 1488.96    6.37   0
   6   6   2   17.75    1.33   0
   7  -4   3   95.19    1.79   0
   8 -10   5  167.71    1.82   0
   8  11   4    3.26    1.40   0
   9 -13   7   32.08    1.19   0
   9 -10   6   17.15    1.13   0
   9  -6   5   74.08    1.45   0
  10  11   6    0.97    1.07   0
  10  15   7    0.42    1.17   0
  12   0   8   13.86    1.11   0
  12   1   8    1.77    0.96   0
 -12  -5   5    6.34    1.30   0
 -12  11   5    2.42    0.87   0
 -11  10   4    9.72    0.85   0
 -11  15   5    8.07    0.75   0
 -10  -3   3   75.45    1.70   0
 -10  18   5   33.95    0.95   0
  -9   2   2  134.34    2.13   0
  -9   3   2   20.90    1.35   0
  -9   4   2   14.20    1.33   0
  -9  13   3   97.25    1.41   0
  -8  -5   2  671.21    4.81   0
  -8  11   2  183.33    1.94   0
  -8  22   5   -0.22    0.66   0
  -7   1   1  307.49    3.18   0
  -7   2   1   31.86    1.34   0
  -7   3   1   17.56    1.23   0
  -7   4   1  105.17    1.71   0
  -7   5   1    9.76    1.11   0
  -7  14   2   28.33    1.19   0
  -7  18   3    2.42    1.00   0
  -7  21   4    1.25    0.69   0
  -6  -4   1  633.23    4.85   0
  -6  10   1  127.48    1.81   0
  -5 -23   7    1.01    1.04   0
  -5  12   1    4.13    1.15   0
  -4 -20   5   51.23    1.81   0
  -4  18   2   28.90    1.22   0
  -4  24   4    0.80    0.89   0
  -4  26   5   11.27    0.80   0
  -3   6   0   -0.20    1.21   0
  -3  22   3    2.07    0.90   0
  -2 -24   7    2.15    1.01   0
  -2 -16   3    1.73    1.36   0
  -2   7   0 5363.86   12.27   0
  -2  19   2   79.59    1.59   0
  -2  22   3    2.90    0.92   0
  -1 -16   3   16.91    1.48   0
  -1 -13   2 1315.00    6.15   0
  -1   7   0    0.64    0.85   0
  -1  15   1  431.04    3.01   0
   0 -24   7   -0.43    0.76   0
   0  22   3   43.63    1.15   0
   1 -25   8   -0.54    0.89   0
   1 -22   6   32.13    1.17   0
   1 -18   4   62.80    1.59   0
   1  24   4    7.56    0.95   0
   3 -24   8    0.99    0.76   0
   3 -10   2  745.90    3.86   0
   3  -4   1 1011.91    5.75   0
   3  16   2  538.99    4.60   0
   4 -23   8    0.67    0.88   0
   4  -8   2    2.80    1.12   0
   5 -22   8   16.79    1.00   0
   6 -19   7    2.92    0.94   0
   6 -17   6  157.34    1.80   0
   6   1   2  312.74    2.97   0
   6   5   2  141.06    2.45   0
   7  -9   4  385.27    2.65   0
   8 -13   6   13.76    0.83   0
   8  -5   4   17.26    1.41   0
   9 -15   8    1.85    0.84   0
  10 -12   8    1.46    0.77   0
  10  -9   7    6.07    1.03   0
  10  -5   6   -1.54    1.11   0
  11  -8   8    0.04    0.64   0
  11  -3   7    2.28    1.01   0
  11   9   7    6.61    1.04   0
  12   2   8    0.89    0.86   0
  12   3   8    7.57    0.93   0
 -12  12   5    0.86    0.85   0
 -11  -5   4   21.93    1.23   0
 -11  11   4   77.30    1.47   0
 -10  -9   4   21.96    1.57   0
 -10  10   3    1.88    1.06   0
 -10  15   4   27.44    0.92   0
  -9   0   2  133.35    2.11   0
  -9   1   2   -1.34    1.32   0
  -9   5   2   17.50    1.32   0
  -9   6   2   15.35    1.30   0
  -9  14   3    0.12    0.97   0
  -9  18   4   56.09    1.28   0
  -8  20   4    0.17    0.90   0
  -7  -8   2   27.85    1.85   0
  -7   0   1    0.42    1.08   0
  -7   6   1    1.40    1.20   0
  -6  16   2   32.20    1.00   0
  -6  20   3   14.47    0.97   0
  -6  25   5    9.52    0.94   0
  -5  21   3   16.37    1.03   0
  -5  26   5   13.23    0.90   0
  -4  14   1   59.53    1.41   0
  -3   0   0    2.08    1.25   0
  -3  19   2  273.87    2.19   0
  -2  15   1  400.84    2.69   0
  -2  25   4    0.33    0.78   0
  -1 -24   7    2.08    0.81   0
  -1  25   4    2.98    0.81   0
  -1  27   5    2.27    0.88   0
   0  19   2    1.27    1.19   0
   1 -20   5   18.82    1.03   0
   1 -12   2    0.90    0.75   0
   1  14   1  149.84    2.29   0
   2 -23   7    0.43    0.80   0
   2 -17   4   27.11    1.29   0
   2 -11   2  465.87    3.20   0
   2  -6   1  369.04    3.62   0
   2  21   3    4.87    1.13   0
   3  25   5    3.22    1.11   0
   4 -15   4    0.23    1.15   0
   4 -12   3    1.52    0.73   0
   4  24   5    4.92    1.06   0
   4  26   6    2.63    1.02   0
   5 -20   7   39.80    1.21   0
   5 -16   5    9.03    1.12   0
   5 -10   3  443.79    2.88   0
   5  -5   2   18.48    0.99   0
   5  20   4   -0.03    1.45   0
   6   4   2   68.45    1.78   0
   6  18   4   10.92    2.39   0
   7 -19   8   15.11    0.81   0
   7 -17   7   28.13    1.11   0
   7 -15   6   23.91    0.96   0
   7 -12   5    2.66    1.06   0
   7  -3   3 1079.36    4.74   0
   7   9   3  212.37    3.40   0
   8 -17   8   13.39    0.75   0
   8 -15   7   74.84    1.25   0
   8  -9   5   12.39    1.11   0
   9 -12   7    5.66    0.97   0
   9  -9   6   27.71    1.22   0
   9  -5   5   19.39    0.89   0
   9  11   5   14.08    1.41   0
  10  -4   6   19.07    1.22   0
  11  -7   8    9.06    0.95   0
  11  -2   7   -0.75    1.05   0
  11   8   7   -0.13    1.11   0
 -12  -6   5    2.83    1.30   0
 -11  12   4   14.91    1.17   0
 -10  -4   3   11.60    1.30   0
 -10  11   3   25.87    1.24   0
 -10  16   4   15.78    0.98   0
  -9 -19   7    0.02    0.47   0
  -9  -1   2    0.13    1.25   0
  -9   7   2    0.10    1.14   0
  -9   8   2    1.98    0.94   0
  -8  12   2   28.54    0.98   0
  -8  17   3   79.68    1.36   0
  -7  -1   1  351.50    3.19   0
  -7   7   1   97.44    1.54   0
  -7  15   2   25.42    1.15   0
  -7  19   3   16.33    1.02   0
  -7  22   4   11.55    0.97   0
  -6  11   1    3.57    1.16   0
  -6  23   4    9.82    0.97   0
  -5 -17   4  113.57    2.75   0
  -5  13   1   22.00    0.99   0
  -5  18   2   32.13    1.15   0
  -5  24   4   15.32    1.01   0
  -4   3   0  321.18    3.12   0
  -4   4   0  362.92    3.11   0
  -4  22   3    0.75    0.95   0
  -3 -25   8    2.68    0.88   0
  -3 -22   6   80.12    1.72   0
  -3   7   0    0.51    0.78   0
  -3  15   1  200.10    1.94   0
  -3  25   4   12.31    0.96   0
  -3  27   5   -0.80    0.86   0
  -2   8   0   10.51    0.97   0
  -1   8   0    0.07    1.25   0
   0 -25   8   -0.29    0.76   0
   0 -22   6   36.34    1.28   0
   0 -18   4   44.51    1.49   0
   0   7   0    0.14    1.27   0
   0  15   1    0.06    1.03   0
   0  25   4   -0.10    0.96   0
   0  27   5    0.88    0.82   0
   1 -15   3  315.45    2.76   0
   2 -24   8   30.73    1.10   0
   2 -21   6   13.95    1.11   0
   2  26   5   13.38    0.99   0
   3 -22   7    1.27    0.79   0
   3 -16   4   23.91    1.21   0
   3 -13   3  753.92    3.59   0
   3  20   3   22.06    1.46   0
   4 -21   7    9.09    0.97   0
   5 -18   6   40.30    1.28   0
   5 -13   4   51.99    1.42   0
   6 -20   8   -0.56    0.87   0
   6 -14   5   -0.50    1.07   0
   6 -11   4   19.12    1.29   0
   6  -7   3  175.76    1.87   0
   6  21   5    2.70    1.53   0
   7  -8   4    7.94    1.23   0
   7  -2   3   87.98    1.71   0
   8  -4   4    1.61    0.89   0
   9 -14   8    1.42    0.84   0
   9  -4   5  100.72    1.66   0
  10  -8   7    1.92    0.86   0
  10  -3   6    9.26    1.18   0
  10  10   6   24.48    1.33   0
  11  -6   8   -0.95    0.95   0
  11  -1   7    0.05    0.92   0
  11   0   7   -2.36    1.11   0
 -13   2   5    1.39    0.90   0
 -13   3   5    0.91    0.88   0
 -13   4   5   -0.33    0.92   0
 -13   5   5    0.13    0.87   0
 -12 -10   6    0.62    1.12   0
 -12   2   4    3.60    0.96   0
 -12   4   4   28.66    1.25   0
 -12   5   4   13.86    1.03   0
 -11 -13   6    0.64    1.34   0
 -11 -10   5    5.16    1.24   0
 -11  -6   4   34.83    1.54   0
 -11  13   4   -0.42    0.92   0
 -10  12   3    5.50    0.96   0
  -9  -8   3    8.86    1.46   0
  -9   9   2   14.95    1.02   0
  -9  15   3   39.40    1.03   0
  -9  19   4   -0.68    0.87   0
  -8  13   2   23.12    1.11   0
  -7   8   1  297.19    2.36   0
  -6 -22   7    2.09    1.30   0
  -6 -10   2    5.15    2.37   0
  -6  12   1  621.37    3.15   0
  -6  17   2  136.56    1.47   0
  -4 -15   3   20.57    5.43   0
  -4   2   0    9.98    1.36   0
  -4   5   0   18.52    0.97   0
  -4   6   0   53.77    1.43   0
  -4  15   1  108.11    1.66   0
  -4  19   2  128.32    1.49   0
  -4  25   4    8.33    0.85   0
  -3 -18   4   83.55    1.90   0
  -3  -1   0    0.47    1.61   0
  -3   8   0    0.45    0.98   0
  -2 -25   8   12.65    1.03   0
  -2 -22   6    0.76    0.92   0
  -2   9   0 2813.68    8.00   0
  -2  16   1   -2.16    1.14   0
  -2  20   2   65.39    1.39   0
  -2  23   3   -1.42    0.90   0
  -1 -25   8   -0.06    0.77   0
  -1 -22   6   32.12    1.24   0
  -1 -18   4   70.92    1.85   0
  -1  23   3    1.40    0.87   0
   0 -20   5   27.00    1.14   0
   0  -8   1 2909.44   10.39   0
   1 -23   7    3.48    0.93   0
   1  -7   1 1081.52    6.17   0
   1  22   3   41.07    1.24   0
   2 -19   5   -0.14    0.70   0
   2 -14   3   42.09    1.29   0
   2  13   1 1356.69    6.98   0
   2  24   4    0.40    0.95   0
   3 -20   6   39.03    1.26   0
   3 -18   5   54.49    1.33   0
   3  -9   2   12.29    1.20   0
   3  23   4   54.78    1.56   0
   4 -19   6   35.80    1.21   0
   4 -17   5   37.76    1.04   0
   5  -4   2  150.85    2.06   0
   5  11   2   45.60    4.24   0
   5  25   6   10.18    1.10   0
   6 -18   7   16.04    0.99   0
   6 -16   6  109.95    1.56   0
   7 -18   8   -0.05    0.83   0
   8 -18   9   -0.44    0.63   0
   8 -16   8    9.44    0.90   0
   8 -14   7   14.38    1.07   0
   8  -8   5   29.10    1.27   0
   8  -3   4   85.45    1.72   0
   8  10   4    1.91    1.48   0
   9 -11   7    1.01    0.97   0
   9  -8   6    6.99    1.12   0
   9  -3   5    1.34    1.03   0
  10  -7   7    0.24    0.96   0
  10  -2   6   24.86    1.26   0
  10   9   6   16.61    1.39   0
  11   1   7    1.52    0.98   0
  11   2   7    2.21    1.00   0
  11   3   7    4.19    1.14   0
  11   5   7   -0.50    1.11   0
 -13   0   5   -0.54    0.94   0
 -13   1   5    9.67    1.15   0
 -12   0   4   30.20    1.29   0
 -12   6   4    6.32    0.82   0
 -12   7   4   -0.28    0.96   0
 -12   8   4   -0.05    0.87   0
 -11   3   3   -0.84    1.09   0
 -11   4   3    6.16    1.05   0
 -11   5   3    2.87    1.04   0
 -11  14   4   22.78    1.06   0
 -10  -5   3   10.70    1.29   0
 -10  17   4    2.78    1.03   0
  -9  -2   2  145.62    2.24   0
  -9  10   2    3.84    1.09   0
  -9  16   3    3.89    0.94   0
  -8 -20   7    1.36    1.65   0
  -8  -6   2  232.48    3.04   0
  -7  -2   1   31.88    1.42   0
  -7   9   1    0.25    0.88   0
  -7  16   2    0.46    0.91   0
  -7  20   3   16.87    0.97   0
  -6  21   3   -0.53    0.91   0
  -6  24   4    4.28    0.82   0
  -5 -21   6    0.54    1.03   0
  -5  14   1  114.36    1.51   0
  -5  22   3    7.16    0.96   0
  -4 -23   7    7.05    1.09   0
  -4   1   0 1606.50    7.36   0
  -4   7   0  354.80    2.75   0
  -3 -20   5    4.92    1.08   0
  -3  20   2   44.55    1.23   0
  -3  23   3    3.67    0.93   0
  -2 -20   5  165.00    2.25   0
  -2 -18   4    0.65    1.14   0
  -1 -20   5   21.67    1.17   0
  -1   9   0   -0.13    1.09   0
  -1  16   1   13.63    1.27   0
  -1  20   2    0.76    1.03   0
   0 -12   2 1083.05    5.24   0
   1  19   2    1.06    1.24   0
   1  27   5    5.17    0.86   0
   2  18   2   10.40    1.22   0
   3 -23   8   -0.67    0.58   0
   3  -3   1  109.64    2.15   0
   4 -22   8    9.63    0.86   0
   4 -14   4   73.98    1.59   0
   4 -11   3   15.37    1.15   0
   5 -21   8    0.92    0.69   0
   5  -9   3  148.94    1.84   0
   6 -21   9   -1.00    0.77   0
   7 -16   7   -0.01    0.83   0
   7 -11   5   13.41    1.05   0
   7  -1   3  191.22    2.15   0
   7   8   3  101.62    2.47   0
   8 -11   6    1.21    1.04   0
   8  -2   4   32.41    1.45   0
   9 -15   9    3.09    0.85   0
   9 -13   8   -0.02    0.94   0
   9  10   5   12.44    1.47   0
   9  15   6   60.28    2.19   0
  10 -12   9    1.22    0.88   0
  10  -1   6   19.28    1.34   0
  10  14   7    1.33    1.27   0
  11  -8   9   15.11    0.99   0
  11  -5   8    3.18    0.82   0
  11   4   7    6.77    0.98   0
 -13  -1   5   10.10    1.06   0
 -12  -7   5   18.53    1.42   0
 -12  -1   4   14.54    1.20   0
 -12   9   4    0.97    0.97   0
 -11   1   3  122.24    1.94   0
 -11   2   3   57.03    1.56   0
 -11   6   3   17.05    0.94   0
 -11   7   3    5.96    1.07   0
 -10  13   3    0.36    0.73   0
 -10  18   4    6.61    0.83   0
  -9  -3   2   23.71    1.69   0
  -9  11   2   13.93    1.03   0
  -9  20   4    0.24    0.88   0
  -8  14   2    1.07    0.69   0
  -8  22   4    3.94    0.84   0
  -7 -21   7    0.47    1.23   0
  -7  10   1   37.67    1.12   0
  -7  23   4   18.85    0.85   0
  -6 -16   4   51.91    2.73   0
  -6  -5   1    5.85    1.38   0
  -6  13   1  167.93    1.89   0
  -6  18   2    2.74    0.86   0
  -5 -19   5    0.41    1.25   0
  -5  19   2   -0.48    0.63   0
  -5  25   4    6.73    0.92   0
  -4   0   0  521.91    4.51   0
  -4   8   0  475.69    3.04   0
  -4  20   2    3.57    0.87   0
  -4  23   3    5.12    0.95   0
  -3  26   4    5.99    0.81   0
  -2  10   0 1407.63    5.50   0
  -2  26   4    4.57    0.96   0
  -1  26   4    0.31    0.78   0
  -1  28   5    1.41    0.71   0
   0 -23   7   -1.26    0.80   0
   0 -15   3    0.10    0.95   0
   0  20   2    0.86    1.04   0
   0  23   3    1.15    0.96   0
   1 -24   8    2.36    0.81   0
   1 -21   6    0.61    0.89   0
   1 -19   5   22.37    1.14   0
   1 -17   4  225.69    2.28   0
   1  25   4    3.77    0.94   0
   2 -22   7   12.54    0.89   0
   2 -10   2  121.44    1.84   0
   3 -24   9    2.98    0.73   0
   4 -23   9    3.23    0.90   0
   4  22   4    6.70    1.15   0
   5 -22   9   -0.41    0.77   0
   5 -19   7    1.17    0.78   0
   5 -17   6    0.62    0.96   0
   5 -15   5   85.12    1.39   0
   5 -12   4  115.36    1.74   0
   5  -3   2   31.42    1.34   0
   5  23   5    1.39    1.15   0
   6 -10   4   32.27    1.10   0
   7 -19   9    9.81    0.89   0
   7  -7   4  196.20    2.00   0
   7   0   3    1.14    1.13   0
   8 -17   9   -1.54    0.90   0
   8  -7   5   24.44    1.25   0
   9  -7   6   95.58    1.55   0
   9  -2   5    3.94    0.84   0
  10  -9   8    6.86    0.97   0
  10  -6   7   23.68    1.11   0
  10   0   6   58.60    1.61   0
  10   8   6    8.93    2.49   0
  11  -4   8    5.29    0.91   0
 -13  -2   5   -0.43    1.00   0
 -12  -2   4    1.53    1.00   0
 -12  10   4   15.10    1.08   0
 -11  -7   4    2.16    1.19   0
 -11   0   3    0.24    1.16   0
 -11   8   3   30.04    0.98   0
 -11  15   4    1.99    0.73   0
 -10 -13   5   69.39    2.67   0
 -10 -10   4   10.69    1.59   0
  -9  12   2    2.21    0.97   0
  -9  17   3   34.76    1.20   0
  -8   4   1   55.14    1.59   0
  -8   5   1   91.38    1.80   0
  -8   6   1   85.71    1.59   0
  -8  15   2   25.51    1.18   0
  -8  19   3    1.94    0.70   0
  -7  11   1   79.97    1.57   0
  -7  17   2   60.31    1.30   0
  -6  22   3   15.97    0.94   0
  -5   4   0    0.45    1.01   0
  -5   5   0    0.71    1.07   0
  -5  15   1   69.18    1.26   0
  -4  16   1    3.04    0.83   0
  -4  26   4   -0.94    0.81   0
  -3 -23   7    1.05    1.00   0
  -3  10   0    0.73    1.05   0
  -2  17   1   89.62    1.63   0
  -1 -23   7    3.27    0.95   0
  -1  10   0    0.70    1.03   0
   0  16   1  131.91    1.99   0
   0  28   5    0.54    0.75   0
   1 -11   2   31.23    1.28   0
   1  15   1  455.92    3.50   0
   2 -20   6   -0.15    0.90   0
   2 -16   4   86.06    1.57   0
   2  -5   1   83.86    1.96   0
   3 -21   7   10.76    0.87   0
   3 -15   4   33.21    1.09   0
   3 -12   3  229.67    2.09   0
   3  11   1   29.02    2.13   0
   4 -20   7   21.17    0.86   0
   4 -18   6    7.61    0.95   0
   4 -16   5   40.60    1.30   0
   4  -6   2   24.86    1.20   0
   4  19   3   46.57    1.75   0
   6 -17   7   75.11    1.37   0
   6 -15   6   45.66    1.15   0
   6  -5   3   28.75    1.20   0
   7 -17   8    2.24    0.88   0
   7 -13   6    2.97    0.83   0
   7 -10   5   -0.22    1.10   0
   7   1   3  183.02    2.70   0
   7   7   3  223.98    3.12   0
   8 -15   8   32.35    1.05   0
   8 -13   7   67.99    1.21   0
   8 -10   6    2.22    0.90   0
   8  -1   4   30.14    1.41   0
   8   9   4   10.65    1.45   0
   8  15   5   51.95    2.52   0
   9 -10   7    3.50    0.70   0
   9  -1   5    3.60    1.05   0
   9   9   5    3.54    1.23   0
  10 -11   9    0.21    0.89   0
  10  -5   7    8.50    1.04   0
  10   1   6   20.22    1.30   0
  10   2   6   27.78    1.35   0
  10   7   6   30.38    1.38   0
  11  -3   8    4.66    1.02   0
 -13  -3   5    0.84    1.24   0
 -12  11   4    1.23    0.76   0
 -11  -1   3  120.26    2.01   0
 -11  10   3    0.53    0.97   0
 -11  16   4   -1.50    0.95   0
 -10  -6   3   -0.12    1.25   0
 -10   3   2   43.51    1.39   0
 -10   4   2   62.41    1.54   0
 -10   5   2   -2.05    1.08   0
 -10   6   2   99.69    1.56   0
 -10  15   3    2.48    0.87   0
 -10  19   4   15.61    0.94   0
  -9  21   4   14.99    0.97   0
  -8   1   1  241.69    2.62   0
  -8   2   1    0.82    1.25   0
  -8   7   1    1.93    1.20   0
  -8   8   1   35.61    1.29   0
  -7  -3   1   20.63    1.32   0
  -7  12   1   22.33    1.41   0
  -7  21   3    1.92    0.74   0
  -7  24   4    4.35    0.98   0
  -6 -20   6   14.67    1.46   0
  -6  14   1  108.20    1.47   0
  -6  19   2   -0.86    0.94   0
  -6  25   4    0.89    0.83   0
  -5   2   0    0.82    1.00   0
  -5   3   0   -0.19    0.67   0
  -5   6   0    0.83    0.77   0
  -5   7   0    0.23    1.07   0
  -5  20   2   19.28    1.06   0
  -5  23   3   -0.14    0.68   0
  -4 -24   8    0.66    0.99   0
  -3 -15   3   75.98    2.42   0
  -3 -12   2  115.07    2.70   0
  -3  17   1  107.31    1.65   0
  -3  21   2   70.73    1.33   0
  -3  24   3   67.19    1.31   0
  -2 -23   7    0.56    0.81   0
  -2  -2   0  668.40    9.03   0
  -2  11   0  351.76    2.80   0
  -2  21   2  127.26    1.64   0
  -2  24   3    0.39    0.90   0
  -1 -15   3  300.97    2.99   0
  -1 -12   2    0.92    1.07   0
  -1  -8   1 1301.71    8.02   0
  -1  17   1    6.10    1.10   0
  -1  21   2    8.83    0.94   0
  -1  24   3   13.40    0.94   0
   0 -24   8    1.68    0.83   0
   0 -21   6    0.54    1.05   0
   0 -17   4    0.21    1.26   0
   0   9   0    0.39    1.20   0
   0  26   4   17.17    1.01   0
   1 -14   3    6.74    1.00   0
   1  23   3    0.40    1.10   0
   2 -23   8   27.68    1.01   0
   2 -18   5   91.89    1.57   0
   2 -13   3    4.78    1.00   0
   2  22   3    2.58    0.96   0
   2  27   5    6.29    1.05   0
   3 -19   6   28.22    1.04   0
   3 -17   5  200.16    2.04   0
   3  -8   2  169.02    2.08   0
   3  -2   1  301.34    3.58   0
   3  17   2    0.61    1.35   0
   3  26   5   -0.48    0.99   0
   4 -10   3  111.31    1.63   0
   5 -20   8    6.61    0.82   0
   5  -8   3   90.00    1.42   0
   5  -2   2  379.28    3.09   0
   6 -20   9    0.21    0.74   0
   6  -9   4   34.20    1.35   0
   7 -15   7    1.43    0.72   0
   7  -6   4  244.78    2.20   0
   7   2   3   86.41    1.82   0
   7   5   3    1.62    1.61   0
   7   6   3   27.11    1.74   0
   8  -6   5    7.20    1.22   0
   8   0   4  250.99    2.58   0
   9 -14   9    1.41    0.69   0
   9 -12   8    1.78    0.67   0
   9  -6   6   11.66    0.86   0
   9   0   5    1.48    1.03   0
   9   1   5    4.07    1.11   0
   9   8   5   19.51    1.38   0
   9  18   7    2.82    1.45   0
  10  -8   8    0.95    0.94   0
  10   3   6   11.91    1.12   0
  10   4   6   17.40    1.30   0
  11  -6   9    4.44    1.02   0
  11  -2   8    0.42    0.98   0
  11  11   8    3.38    0.96   0
 -12  -8   5    2.54    1.22   0
 -12  -3   4   -0.86    1.07   0
 -12  12   4    0.97    0.76   0
 -11  -2   3   55.54    1.68   0
 -11  11   3   15.37    1.09   0
 -10   1   2    7.98    1.12   0
 -10   7   2    2.76    0.73   0
 -10   8   2   11.32    1.15   0
  -9  -9   3  106.00    2.51   0
  -9  -4   2   17.53    1.46   0
  -9  13   2    2.00    0.79   0
  -9  18   3    3.56    0.71   0
  -8   9   1   -1.76    1.39   0
  -8  16   2  181.41    1.84   0
  -8  20   3   34.82    1.10   0
  -8  23   4    1.58    0.87   0
  -7  13   1   31.40    1.26   0
  -7  18   2   10.17    1.07   0
  -6  15   1  485.15    2.90   0
  -5   1   0   -0.14    0.93   0
  -5   8   0   -0.67    0.98   0
  -5  16   1    0.48    0.88   0
  -4 -21   6    0.57    0.87   0
  -4  -1   0 1696.01    8.07   0
  -4  10   0  147.38    1.72   0
  -4  17   1  137.75    1.78   0
  -4  21   2   16.16    1.00   0
  -3  11   0    0.23    0.69   0
  -2 -15   3   45.93    1.86   0
  -2 -12   2   84.23    2.14   0
  -1 -24   8    1.95    0.91   0
  -1  11   0    0.00    0.99   0
   0 -19   5   -0.84    0.99   0
   1 -22   7    4.58    0.84   0
   1  20   2    0.54    1.21   0
   2 -24   9    0.74    0.80   0
   2  14   1    7.63    1.23   0
   3 -22   8    0.60    0.62   0
   3  21   3   34.24    1.42   0
   4 -21   8   23.50    0.89   0
   4 -13   4   -0.34    1.10   0
   5 -21   9    3.01    0.91   0
   5 -18   7    7.40    1.02   0
   5 -14   5    1.59    1.07   0
   5  17   3    4.01    1.85   0
   6 -12   5  131.36    1.80   0
   6  -4   3  335.42    2.64   0
   7 -18   9    1.41    0.84   0
   8 -16   9    0.64    0.66   0
   8 -14   8   21.29    1.11   0
   8 -12   7   15.66    1.12   0
   8   1   4   28.99    1.41   0
   8   8   4   30.18    1.53   0
   9  -9   7   10.46    0.82   0
   9  -5   6   10.17    1.01   0
   9   2   5    3.87    1.21   0
   9   7   5    1.66    1.30   0
  10 -10   9   12.20    0.95   0
  10  -4   7  132.07    1.80   0
  10  13   7   15.56    1.33   0
  11  -1   8   16.47    1.17   0
  11  10   8    1.37    1.09   0
 -13  -4   5    1.53    0.95   0
 -12  -4   4   27.37    1.50   0
 -12  13   4    1.40    0.69   0
 -11 -11   5    1.41    1.22   0
 -11  12   3   -1.23    0.94   0
 -10   0   2   81.69    1.65   0
 -10   9   2    0.47    1.08   0
 -10  10   2   13.49    1.12   0
 -10  16   3   -2.53    0.86   0
  -9  14   2   32.16    1.24   0
  -8 -11   3   72.03    2.81   0
  -8  -7   2   -0.92    1.53   0
  -8   0   1   -0.07    1.23   0
  -8  10   1   46.85    1.49   0
  -7  22   3   -1.44    0.86   0
  -6 -18   5    1.48    1.57   0
  -6  20   2    6.60    0.90   0
  -6  23   3   12.51    0.98   0
  -5 -22   7    8.29    1.10   0
  -5 -14   3    0.92    1.97   0
  -5  24   3    0.74    0.78   0
  -4 -17   4    0.58    1.25   0
  -4  11   0  529.09    2.98   0
  -3 -24   8   -0.10    0.74   0
  -3 -21   6   75.37    1.86   0
  -3  -8   1 1700.98   16.30   0
  -3  -2   0    0.76    1.25   0
  -3  12   0   -0.43    0.91   0
  -3  18   1    3.35    1.02   0
  -2 -24   8   26.48    1.10   0
  -2  12   0  483.92    3.12   0
  -2  18   1   29.48    1.25   0
  -2  27   4    0.39    0.87   0
  -1 -21   6    0.25    0.90   0
  -1  27   4   26.66    1.00   0
   0  10   0 2536.39    8.60   0
   0  17   1    0.24    1.11   0
   0  21   2   -0.32    0.96   0
   0  24   3   10.71    0.99   0
   1 -23   8    3.03    0.88   0
   1  -6   1    0.61    1.28   0
   1  26   4    1.34    0.98   0
   1  28   5   -0.40    0.83   0
   2 -21   7   -0.47    0.91   0
   2  25   4    0.50    0.90   0
   3 -23   9    1.31    0.70   0
   3  24   4    0.30    0.98   0
   4 -22   9    5.41    0.81   0
   4  -5   2  653.31    3.96   0
   4  15   2  207.34    4.12   0
   4  25   5   23.20    1.28   0
   5 -16   6   24.82    0.88   0
   5 -11   4    6.69    0.91   0
   6 -18   8   20.51    0.85   0
   6 -16   7    4.34    1.03   0
   7 -16   8    6.64    0.87   0
   7 -14   7   27.86    1.16   0
   7 -12   6   24.69    0.88   0
   7  -9   5    2.96    1.09   0
   7  -5   4    0.45    1.06   0
   8  -9   6   42.87    1.05   0
   8  -5   5    6.78    1.26   0
   8   2   4   29.26    1.50   0
   8   3   4   91.22    1.93   0
   8   6   4   51.39    1.98   0
   8   7   4   77.04    2.02   0
   9 -13   9    7.55    0.87   0
   9 -11   8    3.47    0.69   0
   9   3   5    0.70    1.05   0
   9   4   5  110.44    1.95   0
  10  -7   8   -0.48    0.86   0
  10  -3   7   -0.23    1.11   0
  11  -5   9    1.64    0.69   0
  11   0   8    4.09    0.92   0
  11   9   8    7.14    1.20   0
 -13   4   4   27.04    1.20   0
 -13   5   4    0.62    0.92   0
 -13   6   4    0.09    0.89   0
 -11  -8   4   -0.32    1.21   0
 -11  -3   3    1.26    1.19   0
 -11  13   3   42.28    1.19   0
 -10  11   2    8.31    1.06   0
 -10  17   3   -0.05    0.79   0
  -9  15   2    4.84    0.96   0
  -9  19   3   24.66    0.87   0
  -8  -1   1  274.21    2.81   0
  -8  11   1   17.12    1.18   0
  -8  21   3   -0.91    0.88   0
  -7  -9   2   13.52    2.02   0
  -7  -4   1  104.30    2.09   0
  -6   5   0  640.86    3.50   0
  -6   6   0   41.00    1.26   0
  -6  16   1   47.42    1.34   0
  -5   0   0   -0.46    1.04   0
  -5  10   0   -0.00    0.92   0
  -5  17   1    4.53    1.08   0
  -5  21   2    0.09    0.69   0
  -4 -19   5  128.94    2.12   0
  -4  18   1  210.56    1.97   0
  -4  27   4    0.48    0.64   0
  -3  22   2  109.04    1.54   0
  -3  25   3    4.27    0.85   0
  -2 -21   6   10.45    0.99   0
  -2  -8   1   88.80    3.07   0
  -2  22   2    0.28    0.90   0
  -2  25   3    0.61    0.77   0
  -1 -19   5   20.66    1.19   0
  -1 -17   4  220.58    2.48   0
  -1  18   1    0.09    1.08   0
   0 -22   7   17.08    0.99   0
   0 -14   3   21.31    1.18   0
   0 -11   2   -0.62    1.06   0
   0  -7   1    1.44    1.41   0
   1 -24   9   15.21    1.02   0
   1 -20   6   36.18    1.00   0
   1 -18   5    7.71    1.12   0
   1 -16   4   97.70    1.74   0
   1   5   0    0.89    1.32   0
   1  16   1   14.58    1.28   0
   2 -15   4   -0.08    1.10   0
   2  -9   2   53.29    1.41   0
   2  -4   1  837.04    5.62   0
   3 -20   7   17.39    0.84   0
   3 -14   4   -0.00    0.87   0
   3 -11   3   11.88    1.02   0
   3  -1   1  139.71    2.69   0
   4 -17   6    5.61    0.97   0
   4 -15   5    3.71    1.16   0
   5  -7   3   81.96    1.38   0
   5  -1   2  115.01    1.81   0
   6 -19   9    0.12    0.77   0
   6  -8   4    7.41    1.23   0
   6  24   6    0.99    1.21   0
   8 -15   9   27.86    1.01   0
   9  -8   7   27.60    0.91   0
   9  -4   6   24.80    1.18   0
   9  14   6   11.77    1.31   0
  10  -9   9   -1.17    0.91   0
  10  -2   7   11.17    1.16   0
  11  -4   9    3.84    0.90   0
  11   1   8   15.51    1.06   0
  11   2   8    1.25    1.00   0
  11   8   8   -0.95    1.17   0
 -13  -5   5   -0.41    1.13   0
 -13   2   4   12.79    1.04   0
 -13   3   4    1.27    1.34   0
 -13   7   4    0.77    1.02   0
 -12   4   3   32.86    1.24   0
 -12   5   3    0.75    0.94   0
 -12   6   3   -1.21    0.91   0
 -12   7   3    9.95    1.03   0
 -11  14   3   28.69    1.06   0
 -10  -7   3  100.76    2.24   0
 -10  -1   2    7.42    1.26   0
 -10  12   2   58.79    1.29   0
  -9  20   3   14.73    0.93   0
  -8  12   1    1.93    1.08   0
  -8  18   2    2.37    0.86   0
  -7 -19   6    0.29    1.32   0
  -7  15   1   68.04    1.34   0
  -7  23   3    4.40    0.83   0
  -6  -6   1  188.73    3.21   0
  -6   3   0  562.80    3.42   0
  -6   4   0   21.06    1.01   0
  -6   7   0  114.90    1.67   0
  -6   8   0  124.29    1.73   0
  -6  24   3   -0.64    0.78   0
  -5  11   0    0.04    1.01   0
  -4  12   0  173.76    1.79   0
  -4  22   2   51.63    1.31   0
  -4  25   3   18.21    1.04   0
  -3 -19   5  108.99    1.99   0
  -3 -17   4  184.60    2.73   0
  -3  13   0   -0.57    0.94   0
  -2 -19   5    0.82    0.96   0
  -2 -17   4   27.06    1.38   0
  -2  13   0 1488.45    5.22   0
  -1  12   0   -0.19    1.08   0
  -1  22   2    0.25    0.94   0
   0  27   4    0.25    0.86   0
   1 -10   2  163.71    2.14   0
   1   6   0    0.50    1.53   0
   2 -22   8    8.69    0.85   0
   2 -19   6   52.74    1.54   0
   2 -17   5  253.20    2.33   0
   3 -18   6    3.65    0.88   0
   3 -16   5    3.89    1.19   0
   4 -20   8    6.77    0.92   0
   4  -9   3  170.02    1.95   0
   6 -11   5    6.91    0.87   0
   6  -3   3  442.48    2.97   0
   7 -17   9   10.39    0.71   0
   7 -11   6  117.74    1.58   0
   7  -8   5    2.66    1.16   0
   7  -4   4   26.15    1.37   0
   8 -13   8   16.24    0.98   0
   8  -8   6    7.37    0.97   0
   8  -4   5  360.07    2.79   0
   9 -12   9    0.23    0.85   0
   9 -10   8   17.03    0.96   0
   9  -7   7   77.65    1.48   0
  10  12   7   54.44    1.74   0
  11  -3   9   79.23    1.54   0
  11   3   8    7.52    0.98   0
  11   4   8    5.90    1.11   0
  11   5   8    4.71    1.09   0
  11   6   8    1.33    1.01   0
 -13   1   4    7.14    1.10   0
 -12  -9   5    7.69    1.28   0
 -12  -5   4   14.14    1.26   0
 -12   2   3   23.82    1.19   0
 -12   3   3   22.96    1.26   0
 -12   8   3   12.95    1.13   0
 -12   9   3    5.77    0.94   0
 -11  -4   3    5.10    1.14   0
 -11  15   3   25.58    1.14   0
 -10  -2   2  233.95    2.56   0
 -10  13   2   20.49    1.07   0
 -10  18   3    5.22    0.95   0
  -9   3   1  127.56    2.44   0
  -9   5   1   47.86    1.58   0
  -9   6   1    6.02    1.25   0
  -9   7   1  112.62    1.77   0
  -9   8   1    2.36    1.02   0
  -9  16   2   66.97    1.15   0
  -8 -18   6    7.03    1.96   0
  -8  -2   1    3.35    1.22   0
  -8  13   1   13.88    1.09   0
  -8  22   3    2.86    0.92   0
  -7  20   2   -0.24    0.92   0
  -6   2   0  944.94    4.48   0
  -6   9   0  369.40    2.55   0
  -6  17   1    1.30    0.91   0
  -6  21   2    1.42    0.69   0
  -5 -23   8   18.04    1.25   0
  -5  12   0    0.47    1.01   0
  -5  18   1   73.60    1.39   0
  -5  22   2    4.24    0.96   0
  -5  25   3    0.83    0.80   0
  -4 -22   7   32.46    1.37   0
  -4  -2   0   10.91    1.67   0
  -4  13   0    1.35    1.10   0
  -3  19   1    4.04    1.14   0
  -2  19   1  511.22    3.09   0
  -2  28   4    0.52    0.75   0
  -1 -22   7    4.68    0.84   0
   0 -23   8   -1.57    0.76   0
   0 -20   6  102.99    1.55   0
   0  11   0    0.07    1.08   0
   1 -21   7    6.10    1.00   0
   1 -13   3    7.28    1.06   0
   1   4   0    0.06    1.07   0
   1   7   0    0.08    1.61   0
   1  24   3   13.72    1.05   0
   2 -23   9   16.88    0.95   0
   2 -12   3  110.42    1.67   0
   2  23   3   -0.72    1.06   0
   4 -21   9    1.64    0.83   0
   4 -12   4    3.49    0.89   0
   4  23   4    1.08    1.15   0
   5 -20   9    0.45    0.60   0
   5 -17   7   73.48    1.23   0
   5 -15   6    3.76    0.95   0
   5 -10   4  108.02    1.56   0
   5   0   2   -1.50    1.43   0
   5  21   4    5.56    1.50   0
   6 -17   8    3.13    0.65   0
   6 -15   7  134.01    1.67   0
   6 -13   6   92.49    1.48   0
   7 -18  10    0.97    0.63   0
   7 -15   8    8.08    0.83   0
   7 -13   7   59.12    1.34   0
   8 -16  10    2.14    0.63   0
   9  -3   6   10.07    0.87   0
  10 -10  10    3.41    0.83   0
  10  -8   9   47.22    1.17   0
  10  -5   8    5.46    0.97   0
  10  -1   7   27.54    1.19   0
  11  -2   9   21.70    1.10   0
 -13   0   4    7.37    1.15   0
 -12   1   3   32.52    1.35   0
 -12  10   3    7.41    1.01   0
 -12  11   3    0.59    0.89   0
 -11 -14   6    5.33    1.42   0
 -11   6   2    0.98    1.03   0
 -11  16   3    0.29    0.88   0
 -10  14   2   46.25    1.23   0
 -10  19   3    0.33    0.86   0
  -9   2   1   40.60    1.61   0
  -9   9   1   46.58    1.32   0
  -9  17   2   65.31    1.28   0
  -8  14   1   14.04    1.00   0
  -8  19   2   12.53    1.04   0
  -7 -17   5   30.10    2.37   0
  -6   1   0  277.05    2.69   0
  -6  10   0  134.33    1.83   0
  -5 -20   6   23.67    1.49   0
  -5  -1   0    0.49    1.05   0
  -4  19   1   20.44    0.90   0
  -4  23   2    7.18    0.93   0
  -3 -22   7   -0.36    0.92   0
  -3  14   0   -0.11    1.02   0
  -3  23   2    1.62    0.97   0
  -3  26   3    5.08    0.86   0
  -2 -22   7   14.38    0.97   0
  -2  23   2    2.24    0.99   0
  -1 -23   8    5.86    0.99   0
  -1  13   0   -0.06    1.01   0
  -1  19   1  448.26    3.18   0
  -1  28   4    7.86    0.85   0
   0 -24   9   16.76    0.97   0
   0 -18   5  174.14    2.02   0
   0 -16   4  159.45    2.04   0
   0  18   1  122.17    1.85   0
   0  22   2   10.11    1.03   0
   0  25   3    0.67    0.82   0
   1  21   2   10.39    1.07   0
   2 -20   7    6.69    0.96   0
   2  15   1  430.22    3.94   0
   3 -22   9    5.36    0.66   0
   3  18   2    4.61    1.42   0
   3  27   5   -0.04    0.93   0
   4 -18   7   22.99    1.11   0
   4 -14   5   10.67    1.20   0
   4  -4   2    0.44    0.75   0
   6 -18   9    1.49    0.84   0
   6  -7   4   72.54    1.51   0
   6  -2   3   20.36    1.14   0
   7  -3   4  116.66    1.90   0
   8 -14   9    1.75    0.73   0
   8 -12   8   48.12    1.25   0
   8 -10   7   47.32    1.27   0
   8  -7   6    0.98    1.06   0
   8  -3   5  198.37    2.28   0
   9 -13  10    3.62    0.66   0
   9 -11   9    0.26    0.82   0
   9  -9   8    6.36    0.86   0
   9  -6   7    1.21    1.09   0
   9  -2   6   14.96    1.15   0
  10   0   7   -1.00    1.01   0
  10  11   7    4.79    1.06   0
  11  -1   9    0.12    0.94   0
 -13  -1   4    8.95    1.14   0
 -12   0   3   -0.62    1.12   0
 -12  12   3    9.34    0.94   0
 -11   3   2   61.52    1.67   0
 -11   5   2   10.06    0.97   0
 -11   7   2   30.98    1.08   0
 -11   8   2   28.99    1.27   0
 -11   9   2   31.53    1.14   0
 -10 -11   4   19.89    1.70   0
 -10  -3   2   45.88    1.71   0
  -9   1   1   78.17    1.93   0
  -9  10   1   51.34    1.12   0
  -9  11   1    0.58    0.88   0
  -8  23   3   17.74    1.07   0
  -7  21   2    4.40    0.93   0
  -7  24   3   11.46    0.80   0
  -6 -21   7    9.62    1.35   0
  -6  11   0  327.94    2.48   0
  -6  18   1    6.01    0.95   0
  -6  22   2   29.49    1.11   0
  -6  25   3   17.59    0.99   0
  -5  13   0    0.59    1.14   0
  -5  19   1    0.58    0.90   0
  -4 -23   8    0.44    0.99   0
  -4  14   0  590.19    3.12   0
  -4  26   3    2.06    0.89   0
  -2  14   0  484.69    2.96   0
  -2  26   3    8.35    0.91   0
  -1 -24   9   17.55    1.03   0
  -1 -20   6   39.87    1.38   0
  -1 -14   3    7.96    1.08   0
  -1 -11   2   29.57    1.60   0
  -1  23   2   50.76    1.30   0
   0  12   0    2.55    1.15   0
   1 -22   8   16.63    1.02   0
   1 -19   6    8.42    1.02   0
   1   8   0    0.21    1.38   0
   1  17   1    5.66    1.13   0
   1  27   4   28.21    1.05   0
   2  20   2   68.36    1.85   0
   2  26   4    5.02    0.98   0
   3 -19   7    0.82    0.84   0
   3 -13   4  507.79    3.06   0
   3 -10   3   32.46    1.18   0
   3   0   1    0.83    1.24   0
   3  12   1  348.20    4.88   0
   3  22   3    2.20    1.15   0
   4 -16   6  192.06    1.92   0
   4  20   3    1.36    1.12   0
   5 -18   8    1.98    0.68   0
   5 -12   5   68.35    1.50   0
   5   1   2  120.11    2.09   0
   5  24   5   49.52    1.89   0
   6 -19  10   12.48    0.91   0
   6 -10   5   41.50    1.14   0
   6  13   3   97.86    4.18   0
   7 -16   9   17.38    0.76   0
   7 -10   6   15.68    1.10   0
   7  -7   5   18.86    1.00   0
   7  14   4   21.07    2.08   0
   8 -15  10   13.91    0.99   0
   8  14   5   34.56    1.99   0
   9  -1   6   82.61    1.64   0
   9  13   6    0.02    1.06   0
  10  -9  10    2.00    0.86   0
  10  -7   9    0.11    0.77   0
  10  -4   8    3.24    0.93   0
  10   2   7   12.35    1.18   0
  10  10   7   38.41    1.54   0
  11   0   9   -0.84    0.97   0
 -13  -2   4   11.56    1.03   0
 -12  -6   4    7.89    1.18   0
 -12  -1   3   31.40    1.28   0
 -12  13   3   -1.22    1.01   0
 -11  -9   4   35.73    1.62   0
 -11  -5   3    3.68    1.15   0
 -11   2   2   47.12    1.52   0
 -11  11   2   -1.41    0.90   0
 -11  17   3   17.17    0.84   0
 -10  15   2   11.81    0.85   0
  -9  -6   2   12.65    1.34   0
  -9   0   1   -0.33    1.22   0
  -9  12   1    1.72    0.92   0
  -9  18   2    0.17    0.93   0
  -8  -8   2   43.00    2.12   0
  -8  15   1  162.41    1.75   0
  -8  20   2    4.84    0.98   0
  -7  -5   1    9.29    1.22   0
  -7   4   0    0.77    1.06   0
  -7   5   0    0.41    0.77   0
  -7   6   0    0.77    0.77   0
  -7   7   0   -0.46    0.90   0
  -7   8   0    0.08    1.16   0
  -7   9   0    0.56    1.13   0
  -7  17   1   57.25    1.04   0
  -6   0   0 1282.14    5.66   0
  -6  12   0   67.21    1.51   0
  -5  14   0    0.37    1.15   0
  -5  23   2   13.00    0.74   0
  -4  20   1    9.69    1.00   0
  -3 -23   8    0.34    0.87   0
  -3  15   0    0.02    1.35   0
  -3  20   1   39.28    1.23   0
  -2 -24   9    1.86    0.95   0
  -2 -23   8   27.88    1.10   0
  -2  20   1   26.03    1.21   0
  -1  14   0    1.15    0.97   0
  -1  26   3   51.65    1.25   0
   0 -21   7   -0.21    0.97   0
   0  28   4    0.88    0.77   0
   1 -23   9    2.04    0.79   0
   1 -17   5   10.80    1.20   0
   1 -15   4  186.03    2.17   0
   1  -5   1  305.49    3.92   0
   2 -21   8    3.13    0.90   0
   2 -18   6   46.35    1.22   0
   2 -14   4  140.81    1.91   0
   2  -8   2   43.70    1.25   0
   2  -3   1 7548.12   18.24   0
   3 -20   8    1.90    0.90   0
   3 -17   6  155.67    1.80   0
   3 -15   5   46.82    1.38   0
   3  -6   2  302.06    2.82   0
   3  25   4   11.97    1.11   0
   4 -19   8   10.19    0.88   0
   4 -11   4    5.07    1.01   0
   5 -19   9    3.06    0.78   0
   5 -16   7   14.96    0.97   0
   5 -14   6   27.70    1.17   0
   5  -9   4   14.37    1.05   0
   5  -5   3   91.93    1.66   0
   6 -16   8    6.32    0.73   0
   6  -1   3   18.82    1.19   0
   7 -17  10   23.63    0.85   0
   7 -14   8   23.96    0.87   0
   7 -12   7    5.26    0.91   0
   7  -2   4   20.66    1.28   0
   8 -13   9   29.46    1.04   0
   8  -9   7   74.96    1.44   0
   8  -6   6    0.42    1.01   0
   8  -2   5    2.22    0.96   0
   9 -12  10    0.25    0.77   0
   9  -8   8    4.60    0.99   0
   9  -5   7   17.69    1.21   0
   9  17   7    1.18    1.30   0
  10  -3   8   14.02    1.09   0
  10   3   7    0.20    1.07   0
  10   9   7    6.57    1.27   0
  11   1   9    1.59    0.96   0
 -11 -12   5    0.75    1.36   0
 -11   1   2  106.33    1.90   0
 -11  12   2    0.50    1.00   0
 -10  -8   3  179.76    2.87   0
 -10  16   2    0.15    0.96   0
  -9 -10   3   56.42    2.14   0
  -9  13   1   26.62    1.16   0
  -9  19   2   -0.96    0.79   0
  -8  16   1   24.01    1.18   0
  -7   3   0   -0.63    1.06   0
  -7  10   0   -0.13    1.22   0
  -7  18   1    2.66    0.89   0
  -7  22   2    5.78    0.92   0
  -6  13   0   45.61    1.39   0
  -6  19   1   16.12    1.04   0
  -6  23   2   24.84    1.00   0
  -6  26   3    2.77    0.81   0
  -5  20   1    1.94    0.86   0
  -4 -20   6   -0.11    1.07   0
  -4 -14   3    0.15    1.50   0
  -4  15   0   90.06    1.40   0
  -4  24   2    1.16    0.96   0
  -3  24   2   -2.89    1.07   0
  -2 -20   6    0.34    0.94   0
  -2 -14   3   42.90    1.62   0
  -2  15   0  229.35    2.44   0
  -1 -18   5    7.93    1.11   0
  -1 -16   4  106.12    1.89   0
   0  19   1    0.27    1.11   0
   1   9   0    0.49    1.16   0
   1  25   3    0.94    1.06   0
   2 -23  10    0.96    0.87   0
   2 -22   9   12.49    0.96   0
   2 -16   5    1.80    1.02   0
   2 -11   3    6.92    0.99   0
   3 -21   9    1.20    0.84   0
   4 -20   9   -1.19    0.83   0
   4  -3   2  171.18    2.30   0
   4  26   5   11.43    1.17   0
   5 -20  10    0.47    0.68   0
   6 -17   9   31.11    1.05   0
   6 -14   7   37.29    0.95   0
   6  -9   5  474.02    2.84   0
   7 -15   9   55.98    1.22   0
   7  -9   6   12.87    1.15   0
   7  -6   5   32.20    1.36   0
   8 -11   8    3.32    0.92   0
   8  -1   5    1.46    1.36   0
   8  18   6    7.71    1.76   0
   9 -10   9   27.74    0.90   0
   9   0   6   16.22    1.11   0
   9  12   6    5.08    1.30   0
  10  -8  10    2.90    0.76   0
  10   4   7  124.21    1.92   0
  10   5   7    9.18    1.15   0
  10   8   7    0.02    1.02   0
  11   2   9   19.50    1.14   0
 -13  -3   4    7.80    1.01   0
 -12  -2   3   22.15    1.31   0
 -11   0   2   18.65    1.35   0
 -11  13   2   14.56    1.06   0
 -10  -4   2   65.28    1.71   0
 -10   5   1   45.37    1.33   0
 -10   6   1   16.08    1.03   0
 -10   7   1   44.57    1.19   0
 -10   8   1    6.02    1.00   0
 -10  17   2    5.15    0.91   0
  -9  -1   1   83.53    1.97   0
  -9  14   1   -0.44    1.06   0
  -8 -16   5    8.32    2.51   0
  -8  21   2    8.43    0.92   0
  -7  11   0   -2.07    1.18   0
  -6  14   0  460.91    2.74   0
  -5 -18   5   28.79    1.44   0
  -5 -16   4  364.22    4.34   0
  -5  -2   0    0.06    1.04   0
  -5  15   0   -1.15    1.16   0
  -5  24   2   -1.54    0.92   0
  -4  16   0  741.39    3.44   0
  -4  27   3   -1.91    0.94   0
  -3 -20   6   37.57    1.35   0
  -3 -14   3   98.66    2.33   0
  -3  16   0   -1.20    1.08   0
  -3  21   1    1.38    0.88   0
  -3  27   3    3.51    0.95   0
  -2  27   3    4.63    0.90   0
  -1 -21   7    6.06    0.99   0
  -1  20   1  126.98    1.80   0
   0 -23   9    0.19    0.84   0
   0 -22   8   -0.87    0.80   0
   0 -13   3    0.31    0.87   0
   0 -10   2  194.10    2.48   0
   0  13   0    0.65    1.02   0
   0  23   2    0.12    0.97   0
   0  26   3    1.07    0.86   0
   1 -20   7   27.56    1.19   0
   1 -12   3  172.57    2.06   0
   1  -9   2  209.46    2.53   0
   1  18   1    1.43    1.30   0
   1  22   2    0.46    0.96   0
   2  24   3    0.40    0.99   0
   3 -22  10    1.21    0.83   0
   4 -21  10    7.80    0.73   0
   4 -17   7    1.89    0.67   0
   4 -13   5  907.19    3.85   0
   5 -17   8   18.46    0.99   0
   6 -18  10    1.37    0.75   0
   6   0   3   -0.15    1.03   0
   6  22   5    1.13    1.62   0
   7 -16  10    0.34    0.86   0
   7 -13   8    1.27    0.97   0
   7 -11   7  101.81    1.55   0
   7  -1   4  490.34    3.45   0
   8 -14  10    6.58    0.65   0
   8  -8   7  150.15    1.69   0
   8  -5   6   54.41    1.42   0
   9 -11  10    1.31    0.83   0
   9  -7   8   14.73    1.08   0
   9  -4   7    3.42    1.00   0
   9   1   6   80.56    1.78   0
  10  -5   9    2.78    0.89   0
  10  -2   8    2.49    0.75   0
  11  -2  10   -0.09    0.75   0
  11   3   9   72.20    1.56   0
  11   4   9    3.05    1.09   0
 -13   4   3    9.44    1.04   0
 -13   5   3    0.08    1.05   0
 -13   6   3   30.28    1.31   0
 -13   7   3    1.50    1.10   0
 -13   8   3    1.32    1.03   0
 -13   9   3    0.90    0.88   0
 -12 -10   5    0.61    1.12   0
 -12  -7   4    1.83    1.17   0
 -11  -6   3   17.27    1.30   0
 -11  -1   2  108.70    2.11   0
 -11  14   2    1.52    0.92   0
 -10   9   1   -0.01    1.01   0
 -10  10   1   38.19    1.31   0
  -9  15   1    5.83    0.96   0
  -9  20   2   -0.21    0.86   0
  -8  -4   1   55.57    1.96   0
  -8  17   1  179.67    1.74   0
  -7   1   0   -1.01    1.05   0
  -7  12   0    1.01    0.78   0
  -7  19   1   14.27    1.03   0
  -7  23   2    0.50    0.78   0
  -6 -22   8   -0.66    0.98   0
  -6  -1   0  279.50    2.88   0
  -6  20   1    8.70    1.06   0
  -5 -21   7    9.30    1.09   0
  -5  21   1    3.44    0.94   0
  -5  27   3   10.11    0.92   0
  -4  21   1    0.89    0.64   0
  -3  -3   0    0.29    1.60   0
  -2 -18   5   99.14    1.78   0
  -2 -11   2  466.34    4.41   0
  -2  16   0  694.26    3.54   0
  -2  21   1   -0.07    1.08   0
  -1  -7   1 1144.45    7.97   0
  -1  15   0   -1.72    1.07   0
  -1  27   3    1.00    0.98   0
   0 -19   6   -1.37    0.94   0
   1  10   0   -0.19    1.07   0
   2 -19   7   93.70    1.47   0
   2  16   1   -2.14    1.27   0
   3 -18   7   -0.16    0.83   0
   3 -12   4  110.68    1.73   0
   3  -9   3  186.90    2.14   0
   4 -15   6    6.15    0.79   0
   4  -7   3  260.70    2.35   0
   4  16   2  378.42    5.16   0
   5 -18   9   43.91    1.15   0
   5 -15   7   11.39    0.91   0
   5 -11   5    2.45    0.88   0
   5  -8   4   60.45    1.40   0
   5  -4   3 1043.86    4.73   0
   5  10   2  308.94    6.08   0
   6 -15   8   -0.23    0.86   0
   6 -11   6    0.78    1.09   0
   6  -5   4   43.84    2.68   0
   7  -5   5   59.49    1.48   0
   7   0   4   57.44    1.69   0
   8 -12   9    3.76    0.83   0
   8 -10   8    4.51    1.10   0
   8   0   5   -0.64    1.37   0
   8  13   5   28.44    1.81   0
   9  -9   9   15.63    0.77   0
   9   2   6   16.05    1.19   0
   9  11   6   26.38    1.54   0
  10  -7  10    0.51    0.70   0
  10  -1   8    3.44    0.94   0
  10  14   8    3.69    1.14   0
  11  -1  10    1.93    0.89   0
  11   5   9    0.01    0.90   0
  11   6   9    5.25    0.95   0
  11   7   9   12.24    1.08   0
 -13  -4   4   30.21    1.51   0
 -13   3   3    0.86    1.09   0
 -12  -3   3   22.02    1.33   0
 -11  15   2    2.55    0.91   0
 -10   2   1    7.20    1.06   0
 -10  11   1   21.84    1.17   0
 -10  18   2   37.84    0.97   0
  -9  -2   1   38.37    1.78   0
  -8   5   0  119.43    1.86   0
  -8   6   0    3.72    1.23   0
  -8   7   0  238.51    2.09   0
  -8   8   0   34.90    1.38   0
  -8  18   1   42.00    1.21   0
  -8  22   2   27.44    0.85   0
  -7  13   0    0.35    0.85   0
  -6  15   0   72.59    1.91   0
  -5  16   0    0.58    0.89   0
  -4 -18   5    0.34    1.13   0
  -4  -3   0  340.33    4.26   0
  -4  17   0  233.33    2.11   0
  -4  25   2    7.94    0.91   0
  -3 -18   5   52.27    1.62   0
  -3  17   0   -1.02    1.14   0
  -3  25   2   28.38    1.08   0
  -2 -21   7    0.30    0.89   0
  -2 -16   4   83.62    1.83   0
  -1 -22   8   16.56    1.05   0
   0 -17   5    0.47    1.15   0
   0 -15   4    0.24    1.09   0
   0  14   0  871.58    4.54   0
   1 -23  10   23.82    1.03   0
   1 -22   9    0.70    0.85   0
   1 -21   8   25.18    0.99   0
   1 -18   6    0.30    0.98   0
   1  28   4    9.28    0.97   0
   2  21   2  123.29    1.99   0
   2  27   4    0.37    0.81   0
   3 -16   6   56.45    1.39   0
   3 -14   5   16.48    1.24   0
   3  -5   2    1.46    1.21   0
   3  19   2  282.23    3.30   0
   4 -18   8   27.19    0.90   0
   4 -10   4  110.33    1.64   0
   4  -2   2  325.23    3.13   0
   5 -19  10    3.85    0.79   0
   5 -13   6    0.14    0.78   0
   5   4   2  153.55    2.70   0
   6 -16   9    6.53    0.99   0
   6 -13   7   10.59    0.75   0
   6  -8   5   55.44    1.51   0
   7 -14   9   13.08    0.93   0
   7  -8   6    1.18    0.98   0
   8 -13  10    3.76    0.85   0
   8  -4   6   15.63    1.19   0
   8   1   5    0.28    1.33   0
   9 -10  10   -1.61    0.80   0
   9  -6   8    0.69    0.96   0
   9  -3   7  138.13    1.69   0
   9   3   6   10.27    1.18   0
   9  10   6   20.31    1.53   0
  10  -4   9    2.60    0.79   0
  10   0   8  153.66    1.98   0
  11   0  10    0.76    0.88   0
 -13   2   3    7.19    1.11   0
 -12   4   2   24.39    1.19   0
 -12   5   2   17.03    1.19   0
 -12   7   2    3.52    0.73   0
 -12   8   2    7.69    0.80   0
 -12   9   2   18.84    1.12   0
 -11  -2   2   42.26    1.72   0
 -11  16   2   10.73    0.99   0
 -10  12   1   55.04    1.19   0
 -10  13   1   11.54    0.99   0
 -10  19   2   -0.97    0.96   0
  -9 -13   4    7.24    2.17   0
  -9  -7   2   -0.39    1.42   0
  -9  16   1    6.23    0.79   0
  -9  21   2   -0.47    0.86   0
  -8   3   0   10.41    1.25   0
  -8   4   0  186.86    2.00   0
  -8  10   0   48.87    1.23   0
  -8  11   0    6.98    1.15   0
  -7 -20   7    8.57    1.25   0
  -7   0   0    0.44    1.04   0
  -7  14   0    0.71    1.06   0
  -7  20   1   12.78    0.99   0
  -7  24   2    1.10    0.84   0
  -6 -19   6    4.93    1.70   0
  -6  16   0   14.91    1.17   0
  -6  21   1   57.09    1.26   0
  -5  17   0   -0.47    1.08   0
  -4 -21   7    9.93    0.99   0
  -4 -16   4  120.39    2.46   0
  -4  22   1   21.69    1.09   0
  -3 -21   7   11.15    1.00   0
  -3 -16   4   26.17    1.52   0
  -3  22   1   10.77    0.99   0
  -3  28   3    3.07    0.88   0
  -2  17   0   47.42    1.49   0
  -2  25   2    8.65    0.70   0
  -1 -23   9    2.97    0.78   0
  -1 -19   6    8.89    1.21   0
  -1  16   0   -0.86    1.06   0
  -1  21   1   90.04    1.56   0
   0 -20   7  218.51    2.14   0
   0  20   1   29.22    1.26   0
   0  24   2   85.41    1.65   0
   1 -16   5    0.34    1.09   0
   1 -14   4  316.64    2.63   0
   1  11   0   -0.06    1.02   0
   2 -22  10    3.23    0.89   0
   2 -21   9   18.03    1.00   0
   2 -20   8    5.03    0.69   0
   2 -17   6   33.08    1.19   0
   2 -15   5   73.88    1.58   0
   2 -13   4    0.26    0.70   0
   2  -7   2  227.87    2.68   0
   3 -20   9   16.53    1.03   0
   3  13   1   26.26    1.80   0
   3  23   3    1.86    1.11   0
   4 -20  10   11.19    0.94   0
   4 -19   9   24.43    0.85   0
   4 -16   7   28.46    1.06   0
   4  24   4   -0.26    1.03   0
   5 -16   8   10.42    0.98   0
   6 -17  10   -0.48    0.83   0
   7 -15  10   -0.84    0.78   0
   7 -12   8    8.90    1.06   0
   7 -10   7   93.93    1.43   0
   7   1   4  530.97    3.58   0
   7  13   4   52.19    2.40   0
   8 -14  11    4.38    0.73   0
   8 -11   9   -0.17    0.85   0
   8  -7   7  147.32    1.64   0
   9  -8   9    0.65    0.84   0
   9  -2   7    0.74    1.05   0
   9   4   6   25.37    1.22   0
   9   5   6   11.19    1.10   0
   9   9   6   30.86    1.60   0
  10  -6  10    1.24    0.65   0
  10  -3   9    3.70    0.95   0
  10   1   8    4.65    1.08   0
  10  13   8    0.77    1.18   0
  11   1  10    0.15    0.92   0
 -13   1   3   19.68    1.24   0
 -12  -4   3   30.34    1.64   0
 -12   3   2    6.86    1.17   0
 -12  11   2   38.39    1.01   0
 -12  12   2    1.23    0.89   0
 -11  17   2   29.04    1.07   0
 -10   1   1   88.36    1.88   0
 -10  14   1    2.73    0.98   0
  -9  17   1    0.71    0.98   0
  -8  12   0   59.13    1.41   0
  -8  19   1    7.04    0.95   0
  -8  23   2    0.81    0.69   0
  -6  -7   1  266.00    4.01   0
  -6  -2   0  962.35    5.25   0
  -6  25   2   41.95    1.20   0
  -5 -22   8   13.93    1.11   0
  -5  22   1    0.35    0.98   0
  -4  18   0  127.32    1.71   0
  -3 -11   2   31.91    1.84   0
  -3  18   0    0.50    0.99   0
  -2 -23   9   20.12    1.05   0
  -2 -22   8    8.76    0.87   0
  -2  22   1    3.84    0.91   0
  -2  28   3    5.22    0.96   0
  -1 -13   3    6.92    1.09   0
  -1  25   2    0.74    0.82   0
   0  27   3    0.51    0.86   0
   1  19   1  495.42    3.67   0
   1  23   2   54.68    1.45   0
   1  26   3   51.51    1.35   0
   2 -10   3  233.80    2.35   0
   3 -21  10   10.33    0.86   0
   3  26   4    7.39    1.03   0
   4 -14   6  189.54    2.02   0
   4 -12   5  287.23    2.30   0
   4  21   3   19.11    1.52   0
   5 -10   5   73.55    1.52   0
   5  -7   4   89.47    1.53   0
   5   5   2   19.94    1.44   0
   5   9   2  165.87    3.87   0
   5  18   3   50.69    2.70   0
   6 -14   8    9.30    0.95   0
   6 -10   6    2.35    1.26   0
   6  -4   4    9.66    1.05   0
   6   2   3   20.47    1.28   0
   7 -16  11    0.76    0.58   0
   7  -4   5    6.45    1.17   0
   8  -9   8  114.85    1.46   0
   8  -3   6   30.99    1.34   0
   8   2   5    3.08    1.29   0
   8  12   5   37.87    1.72   0
   9 -11  11    0.27    0.57   0
   9  -5   8   -0.45    1.01   0
   9  16   7   11.38    1.44   0
  10  -5  10   10.52    0.93   0
  10   2   8    1.28    1.03   0
  11   2  10   -0.41    0.85   0
 -13  -5   4    0.68    0.94   0
 -13   0   3    0.54    1.11   0
 -12   2   2    0.45    1.12   0
 -12  13   2   -1.97    1.01   0
 -11 -10   4    9.30    1.28   0
 -11  -7   3    3.43    1.16   0
 -10 -14   5   26.48    2.44   0
 -10  -9   3    5.81    1.33   0
 -10   0   1   -0.07    1.10   0
 -10  15   1   -0.14    0.99   0
 -10  20   2   18.24    0.80   0
  -9  -3   1  147.50    2.46   0
  -9  18   1   22.18    1.12   0
  -9  22   2    4.77    0.69   0
  -8   2   0  476.94    3.33   0
  -8  13   0  104.00    1.53   0
  -8  20   1    9.16    0.90   0
  -7  16   0    0.73    0.88   0
  -7  21   1    5.71    0.96   0
  -6  17   0   82.34    1.25   0
  -6  22   1    8.66    0.92   0
  -5  -3   0    0.34    1.00   0
  -5  18   0   -0.95    1.03   0
  -5  26   2   -0.10    0.79   0
  -4 -23   9    2.64    0.95   0
  -4 -22   8   11.39    0.98   0
  -4 -11   2  321.11    5.22   0
  -4  23   1   13.37    0.98   0
  -4  26   2   -1.55    0.92   0
  -3 -23   9    2.79    1.01   0
  -3 -22   8   -0.19    0.87   0
  -3  26   2    7.93    0.95   0
  -1 -17   5   10.04    1.39   0
  -1  28   3    4.29    0.77   0
   0 -23  10   -0.21    0.86   0
   0 -22   9    1.19    0.90   0
   0 -21   8    1.08    0.77   0
   0  15   0   -0.87    1.12   0
   1 -19   7   70.45    1.37   0
   1  12   0   -0.29    1.32   0
   2 -18   7    1.07    0.89   0
   2  17   1   97.34    2.22   0
   2  25   3    0.27    0.99   0
   3 -17   7   14.02    0.93   0
   3 -11   4   55.27    1.28   0
   4 -17   8   63.84    1.34   0
   4  -6   3   28.93    1.30   0
   5 -19  11    5.57    0.89   0
   5 -18  10    5.05    0.83   0
   5 -17   9   35.21    0.93   0
   5 -14   7   15.70    0.81   0
   5 -12   6  411.54    3.23   0
   5  -3   3  577.44    3.49   0
   5   6   2 1090.19    7.11   0
   5  22   4  121.94    2.96   0
   6 -15   9   27.12    1.05   0
   6 -12   7   21.57    0.84   0
   6  -7   5  416.70    2.74   0
   6  12   3   82.32    3.31   0
   7 -13   9   -0.10    0.77   0
   7  -7   6    7.33    0.91   0
   7   2   4   21.24    1.46   0
   8 -12  10    5.38    0.74   0
   8  -6   7    8.73    1.05   0
   8   3   5  207.64    2.59   0
   9  -9  10    0.39    0.53   0
   9  -1   7   34.22    1.29   0
  10  -2   9    7.05    0.87   0
  10   3   8   12.34    1.14   0
  10  12   8    0.12    1.17   0
 -13  -1   3   18.98    1.39   0
 -12  -8   4    0.12    0.97   0
 -12   1   2    1.24    1.13   0
 -12  14   2    0.81    0.67   0
 -11  -3   2   61.01    1.76   0
 -11   5   1   21.16    1.30   0
 -11   6   1    5.34    1.17   0
 -11   7   1    6.11    0.86   0
 -11   8   1    8.44    0.84   0
 -11   9   1   21.77    1.17   0
 -11  10   1    2.72    1.01   0
 -11  11   1    3.31    0.90   0
 -10  16   1    4.35    0.84   0
  -9   6   0   -2.55    1.24   0
  -9   7   0   -0.24    1.21   0
  -9   8   0   -0.12    1.18   0
  -9  10   0   -0.53    0.96   0
  -8  -5   1   89.60    2.09   0
  -8   1   0   69.51    1.71   0
  -8  14   0    5.75    0.77   0
  -8  24   2    5.79    0.70   0
  -7 -21   8    0.31    1.07   0
  -7  -1   0   -0.23    1.06   0
  -7  25   2   10.99    0.72   0
  -6 -13   3   92.42    4.45   0
  -6  18   0   57.56    1.22   0
  -6  26   2   12.47    0.90   0
  -5  23   1    3.30    1.10   0
  -4   6  -1  604.46    3.66   0
  -4   7  -1   23.89    1.19   0
  -4   8  -1   17.19    1.32   0
  -4   9  -1  492.49    3.01   0
  -4  19   0  317.46    2.32   0
  -3   7  -1  577.31    3.68   0
  -3   8  -1 1588.17    6.29   0
  -3   9  -1    2.69    0.94   0
  -3  23   1    0.96    0.72   0
  -2 -19   6   45.38    1.94   0
  -2  18   0    0.17    0.82   0
  -2  26   2    2.10    0.92   0
  -1 -20   7   25.24    1.17   0
  -1 -15   4  185.16    2.27   0
  -1 -10   2  160.06    2.54   0
  -1  17   0   -0.25    1.12   0
  -1  22   1   10.44    1.03   0
   0 -18   6  111.02    1.63   0
   0 -12   3   82.77    1.64   0
   0  21   1    1.14    1.04   0
   1 -20   8    2.93    0.92   0
   1 -11   3    7.62    1.07   0
   1  -8   2   62.81    1.71   0
   1  -4   1  359.68    4.11   0
   2  22   2    0.61    1.01   0
   3 -15   6   13.05    1.20   0
   3  -8   3   77.71    1.52   0
   4 -18   9    2.37    1.03   0
   4  -9   4   53.34    1.28   0
   4  -1   2  196.51    2.50   0
   5   7   2    5.77    1.39   0
   5  25   5    0.81    1.04   0
   6 -17  11   -0.66    0.89   0
   6 -16  10   25.10    1.00   0
   6  -3   4   28.89    1.26   0
   7 -14  10   -0.97    0.81   0
   7 -11   8    9.96    0.96   0
   7  -9   7  108.30    1.49   0
   7  -3   5  155.56    2.03   0
   7   3   4  118.71    2.14   0
   8 -13  11   -0.03    0.65   0
   8 -10   9    0.06    0.78   0
   8  -8   8    0.12    1.06   0
   8  -2   6   52.83    1.47   0
   8   4   5  370.04    3.29   0
   8  11   5   16.65    1.47   0
   9 -10  11    7.33    0.79   0
   9  -4   8   22.33    1.07   0
  10  -4  10   24.34    1.06   0
  10  -1   9    0.12    0.92   0
  10   4   8    3.24    1.02   0
  10  11   8    5.55    1.16   0
 -12  -5   3    1.72    1.21   0
 -12   0   2   15.96    1.18   0
 -11   4   1   29.76    1.40   0
 -11  12   1    8.60    1.04   0
 -10  -1   1   97.55    1.81   0
 -10  17   1   11.81    0.89   0
  -9   4   0    0.75    1.20   0
  -9   5   0   -0.74    0.89   0
  -9  11   0    1.10    0.98   0
  -9  12   0    1.29    0.83   0
  -9  19   1   11.95    0.77   0
  -8  15   0   31.09    0.94   0
  -7  17   0    0.83    0.64   0
  -7  22   1    2.46    0.63   0
  -6  23   1   -1.39    0.94   0
  -5 -19   6   15.98    1.35   0
  -5   6  -1   91.58    1.68   0
  -5   7  -1  315.91    2.57   0
  -5   8  -1  829.66    4.13   0
  -5   9  -1   44.23    1.24   0
  -5  10  -1    2.28    1.03   0
  -5  19   0    0.77    0.92   0
  -4   5  -1  833.39    4.35   0
  -4  10  -1  181.51    1.88   0
  -4  11  -1  174.42    1.90   0
  -3 -19   6   29.39    1.35   0
  -3   6  -1  367.67    3.22   0
  -3  10  -1  388.13    2.81   0
  -3  19   0   -0.07    0.78   0
  -2  23   1   12.16    1.40   0
   0  16   0 3841.66    9.01   0
   0  25   2   -0.58    0.79   0
   1 -22  10   10.51    0.86   0
   1 -21   9   32.54    1.14   0
   1 -17   6  115.44    1.65   0
   1  13   0   -0.13    1.18   0
   2 -19   8   44.91    1.18   0
   2 -16   6   82.89    1.57   0
   2 -12   4  108.60    1.61   0
   2  28   4   -0.44    0.93   0
   3 -21  11    2.39    0.83   0
   3 -19   9    9.35    0.97   0
   3 -18   8    6.05    0.76   0
   3 -13   5   96.93    1.53   0
   3  -4   2 1265.54    5.87   0
   3  20   2   43.35    1.64   0
   4 -20  11    4.51    0.67   0
   4 -19  10    1.62    0.75   0
   4 -15   7   65.69    1.29   0
   5 -15   8   18.14    0.99   0
   5  -9   5  127.82    1.76   0
   6 -13   8    1.82    0.93   0
   6  -9   6   34.90    1.30   0
   7 -15  11    4.52    0.63   0
   7  -6   6   29.39    1.42   0
   7  12   4   27.34    1.92   0
   8 -11  10   13.51    0.92   0
   8  -5   7    4.97    1.01   0
   8  10   5  179.55    2.76   0
   9  -8  10   -0.91    0.72   0
   9  -6   9    0.77    0.85   0
  10   5   8    1.05    0.97   0
  10   6   8   70.18    1.69   0
  10   9   8    8.53    1.26   0
  10  10   8   49.55    1.58   0
 -13  -6   4    2.32    1.08   0
 -13  -2   3    5.43    1.02   0
 -13   7   2    0.89    0.92   0
 -13   8   2    0.36    0.91   0
 -13   9   2    6.31    0.94   0
 -12 -11   5    2.15    1.22   0
 -11   3   1   46.60    1.33   0
 -11  13   1   37.80    1.02   0
 -11  14   1    4.40    0.84   0
 -10  -6   2  108.30    1.96   0
  -9   3   0    0.43    1.30   0
  -9  13   0    1.77    1.04   0
  -9  20   1   18.06    0.96   0
  -8 -19   7   11.27    1.57   0
  -8  -9   2    4.02    1.76   0
  -8   0   0   93.09    1.87   0
  -8  16   0    1.11    1.06   0
  -7  18   0   -0.95    0.98   0
  -6 -20   7    1.44    1.06   0
  -6 -17   5   65.93    2.20   0
  -6   8  -1   13.19    1.26   0
  -6   9  -1  158.41    1.86   0
  -6  19   0   43.86    1.25   0
  -5   5  -1  104.80    1.79   0
  -5  11  -1   15.25    1.17   0
  -5  24   1   54.10    1.20   0
  -5  27   2    0.26    0.89   0
  -4 -19   6   38.45    1.68   0
  -4   4  -1  892.27    4.61   0
  -4  12  -1  633.65    3.16   0
  -4  20   0   -0.73    0.84   0
  -4  24   1   75.67    1.32   0
  -4  27   2   -0.04    0.64   0
  -3   5  -1  486.06    3.82   0
  -3  11  -1   30.95    1.01   0
  -3  24   1   24.26    1.01   0
  -2 -20   7    5.52    1.13   0
  -2 -17   5  263.91    2.78   0
  -2 -13   3    5.76    1.17   0
  -2  19   0  266.50    2.37   0
  -1 -23  10   21.89    0.99   0
  -1 -22   9   -0.08    0.87   0
  -1 -21   8   25.24    0.96   0
  -1  18   0    0.32    1.10   0
  -1  26   2   22.49    1.10   0
   0 -16   5    1.30    1.05   0
   0 -14   4  132.71    1.91   0
   0  -9   2    0.55    1.03   0
   0  28   3    2.31    0.87   0
   1  20   1  130.15    1.96   0
   1  27   3    2.05    0.80   0
   2 -21  10   27.41    0.99   0
   2 -20   9    0.19    0.62   0
   2 -14   5  431.43    2.78   0
   2  -6   2  623.82    4.27   0
   3 -20  10    4.70    0.62   0
   3  14   1  102.55    2.75   0
   4 -13   6   25.05    1.25   0
   4 -11   5  132.33    1.76   0
   5 -16   9   11.85    0.95   0
   5 -13   7    7.79    1.09   0
   5 -11   6    2.12    1.12   0
   5  -6   4  485.83    2.97   0
   5  -2   3  310.81    2.68   0
   6 -11   7   76.63    1.24   0
   7 -12   9    4.29    0.80   0
   7  -2   5   26.98    1.40   0
   8 -12  11    3.47    0.92   0
   8  -9   9   -1.20    0.89   0
   8  -7   8   96.08    1.54   0
   8  -1   6    0.45    1.23   0
   8   8   5   31.19    1.50   0
   8   9   5    9.76    1.50   0
   9  -9  11   14.83    0.88   0
   9  -3   8   -0.01    0.94   0
   9   1   7   31.89    1.28   0
   9  15   7    0.76    1.13   0
  10  -5  11    8.92    0.85   0
  10  -3  10    1.55    0.81   0
 -13   5   2    6.55    1.00   0
 -13   6   2   30.25    1.25   0
 -12  -1   2    3.61    1.12   0
 -11  -4   2    5.27    1.19   0
 -11   2   1   51.61    1.59   0
 -11  15   1   -0.30    0.93   0
 -10 -12   4    0.11    1.45   0
 -10  -2   1    6.80    1.36   0
 -10  18   1    3.96    0.69   0
  -9  -4   1   81.47    1.94   0
  -9   2   0   64.40    1.73   0
  -9  14   0    0.88    1.03   0
  -8  17   0   66.37    1.36   0
  -8  22   1    3.24    0.90   0
  -7  -2   0    0.62    1.08   0
  -7  23   1    4.00    0.70   0
  -6  -3   0  566.63    4.25   0
  -6   6  -1  179.78    1.95   0
  -6   7  -1  249.04    2.17   0
  -6  10  -1  128.80    1.63   0
  -6  11  -1    3.45    1.18   0
  -6  24   1   13.25    0.93   0
  -5   4  -1   19.15    1.17   0
  -5  12  -1    2.93    0.84   0
  -5  13  -1   22.46    1.22   0
  -5  20   0   -0.35    0.60   0
  -4  13  -1   39.25    1.28   0
  -3   4  -1 1079.00    5.57   0
  -3  12  -1  330.58    2.48   0
  -3  20   0    1.10    1.03   0
  -2   7  -1  863.04    4.97   0
  -2   8  -1   88.70    1.66   0
  -2   9  -1  123.70    1.82   0
  -2  10  -1  194.10    2.19   0
  -2  24   1    2.49    0.90   0
  -2  27   2   45.69    1.23   0
  -1  29   3    4.12    0.82   0
   0 -19   7    0.43    0.66   0
   0  22   1  190.69    2.06   0
   1 -15   5   84.78    1.59   0
   1 -13   4   28.57    0.99   0
   1   3   0    0.29    0.91   0
   2  18   1   29.45    1.70   0
   3 -16   7   65.70    1.28   0
   3  24   3   65.71    1.75   0
   4 -16   8   32.28    1.08   0
   4  -5   3   76.48    1.53   0
   4  17   2    7.16    1.90   0
   5 -18  11   -0.61    0.66   0
   5 -17  10    6.19    0.65   0
   6 -15  10   -1.01    0.82   0
   6 -14   9    0.64    0.67   0
   6  -2   4   20.43    1.18   0
   6   5   3   31.08    1.43   0
   6  11   3   10.17    1.99   0
   7 -14  11   10.36    0.85   0
   7 -13  10   16.62    0.85   0
   7 -10   8   -0.44    0.65   0
   7  -8   7   35.48    1.00   0
   7  11   4    6.13    1.86   0
   8  -4   7   -0.50    1.02   0
   8  17   6   28.17    1.95   0
   9  -7  10    4.14    0.75   0
   9  -5   9   37.34    1.12   0
   9  -2   8    0.65    1.04   0
   9   2   7   -0.69    1.10   0
  10  -2  10   30.62    1.12   0
  10   1   9   -0.66    0.84   0
 -11  -8   3   28.09    1.50   0
 -11   1   1    3.81    1.23   0
 -11  16   1    2.65    0.95   0
 -10   7   0    1.69    0.86   0
 -10   8   0    4.05    1.06   0
 -10   9   0   11.70    1.14   0
 -10  10   0   57.49    1.34   0
 -10  19   1    0.21    0.90   0
  -9  -8   2   -0.20    1.34   0
  -9  21   1    8.71    0.72   0
  -8  18   0   81.13    1.40   0
  -7 -10   2    2.83    2.05   0
  -7  19   0   -0.69    0.77   0
  -6 -21   8   27.65    1.38   0
  -6   5  -1    5.87    0.81   0
  -6  12  -1  656.21    3.28   0
  -6  20   0   81.80    1.27   0
  -5  14  -1  113.23    1.71   0
  -4   3  -1  105.01    1.98   0
  -4  14  -1   60.13    1.45   0
  -4  21   0   73.45    1.28   0
  -4  25   1    1.54    0.86   0
  -4  28   2    1.23    0.80   0
  -3 -20   7   14.98    1.14   0
  -3  13  -1   22.89    0.92   0
  -2 -23  10    0.56    0.75   0
  -2 -22   9   13.49    0.99   0
  -2 -21   8    2.54    0.87   0
  -2 -15   4   -0.20    1.13   0
  -2   6  -1  363.60    3.57   0
  -2  11  -1  375.76    2.80   0
  -2  20   0  223.84    2.13   0
  -1 -18   6    1.50    0.88   0
  -1  19   0   -0.06    0.97   0
   0 -22  10   15.50    0.97   0
   0 -21   9   -0.08    0.86   0
   0 -20   8  134.04    1.75   0
   0  17   0   -0.13    1.21   0
   1  14   0    0.06    0.98   0
   2 -17   7  133.51    1.64   0
   2  -9   3  324.44    2.64   0
   2  26   3    6.38    0.96   0
   3 -10   4  101.55    1.47   0
   3  27   4   11.71    1.09   0
   4 -19  11    5.61    0.86   0
   4 -18  10   11.35    0.90   0
   4 -17   9    8.92    0.93   0
   4  -8   4    5.69    0.75   0
   4   0   2 3077.61    9.33   0
   4  25   4    6.74    1.20   0
   5 -14   8    3.48    0.83   0
   6 -16  11    0.48    0.57   0
   6 -12   8   11.85    0.92   0
   6  -8   6    2.01    1.16   0
   6   6   3   17.24    1.51   0
   7  -5   6  400.83    2.66   0
   7   6   4  263.47    3.03   0
   8 -10  10   21.79    0.94   0
   8   0   6   41.56    1.45   0
   9  -8  11   36.34    1.08   0
   9   3   7  145.12    2.03   0
   9  14   7    0.66    1.14   0
  10  -4  11    3.23    0.64   0
 -13  -3   3    0.73    1.12   0
 -13   3   2    9.18    1.10   0
 -12  -9   4    0.32    1.12   0
 -12  -6   3   -0.45    1.11   0
 -12  -2   2   -1.28    0.96   0
 -12   6   1    9.99    1.07   0
 -12   7   1    0.11    1.02   0
 -12   8   1    3.19    1.02   0
 -12   9   1   13.37    1.08   0
 -12  10   1    1.15    1.01   0
 -12  11   1   14.14    0.98   0
 -11  17   1    2.09    1.01   0
 -10   5   0   -0.45    1.00   0
 -10   6   0   56.49    1.41   0
 -10  11   0   61.66    1.24   0
 -10  12   0    2.39    1.06   0
 -10  20   1   14.69    0.95   0
  -9   1   0   -0.64    1.24   0
  -9  16   0    1.27    0.69   0
  -9  22   1    0.55    0.77   0
  -8  -1   0   67.77    1.77   0
  -8  23   1   11.32    0.76   0
  -7 -18   6   34.89    1.85   0
  -7   6  -1   -0.51    1.18   0
  -7   7  -1  103.61    1.74   0
  -7   8  -1  299.92    2.39   0
  -7   9  -1   -0.13    0.88   0
  -7  10  -1   42.00    1.38   0
  -7  11  -1   79.07    1.57   0
  -7  20   0    0.10    0.82   0
  -7  24   1   11.21    0.77   0
  -6 -15   4   27.00    2.02   0
  -6   4  -1  608.90    3.55   0
  -6  13  -1  164.33    1.75   0
  -6  14  -1  107.42    1.62   0
  -6  21   0   65.31    1.27   0
  -6  25   1   -0.50    0.82   0
  -5 -20   7   24.70    1.24   0
  -5 -17   5   22.35    1.55   0
  -5   3  -1  109.34    1.70   0
  -5  15  -1   67.97    1.45   0
  -5  21   0   -0.09    0.72   0
  -5  25   1    1.04    0.67   0
  -4 -20   7   19.60    1.10   0
  -4  15  -1  108.03    1.71   0
  -3 -21   8    2.10    1.02   0
  -3 -17   5  193.36    2.40   0
  -3  14  -1   91.66    1.73   0
  -3  21   0    0.16    0.92   0
  -3  25   1    1.52    0.98   0
  -3  28   2   -0.51    0.90   0
  -2   5  -1   86.17    2.08   0
  -2  12  -1   98.55    1.53   0
  -1  27   2    2.85    0.91   0
   0  26   2   33.76    1.21   0
   1 -21  10    1.75    0.86   0
   1 -19   8    9.73    1.06   0
   2 -21  11    2.23    0.88   0
   2 -18   8   75.25    1.39   0
   2  -1   1  353.02    4.27   0
   2  23   2    2.38    0.98   0
   3 -20  11    1.71    0.91   0
   3 -18   9   -0.58    1.14   0
   3 -17   8   -0.14    0.65   0
   3 -12   5  114.56    1.68   0
   3  -7   3   71.01    1.36   0
   4 -14   7   44.90    1.27   0
   4  22   3    0.17    1.25   0
   5 -15   9   18.81    1.02   0
   5  -8   5   51.44    1.30   0
   5  -5   4  206.88    2.07   0
   5  -1   3  106.40    1.89   0
   6 -10   7   -2.09    0.95   0
   6  -5   5    6.73    1.16   0
   6   7   3  174.09    2.86   0
   6  10   3  127.09    3.12   0
   7 -11   9    3.22    0.70   0
   7  -9   8   14.20    0.91   0
   7  -7   7  122.59    1.68   0
   7  -1   5   31.78    1.14   0
   7   7   4  205.40    2.83   0
   7   9   4  381.07    4.05   0
   7  10   4  188.21    3.22   0
   7  18   5    0.04    1.93   0
   8 -11  11    0.82    0.60   0
   8  -8   9    3.52    0.72   0
   8  -6   8   46.19    1.12   0
   9  -6  10    0.65    0.78   0
   9  -4   9   32.48    1.10   0
   9   4   7    4.20    1.18   0
  10  -1  10    3.05    0.81   0
  10   3   9    1.81    0.97   0
 -13  -7   4   -0.20    1.09   0
 -13   2   2   -1.09    1.06   0
 -12   5   1   -0.38    1.09   0
 -12  12   1    0.20    0.69   0
 -11 -13   5   13.28    2.01   0
 -11  -5   2    8.93    1.43   0
 -11   0   1    0.77    1.19   0
 -11  18   1   -1.05    0.93   0
 -10   4   0    4.06    1.30   0
 -10  13   0    0.80    0.70   0
  -9  17   0   -0.96    0.97   0
  -8  19   0   -0.23    0.68   0
  -7  -7   1  101.14    2.63   0
  -7  12  -1   23.82    1.06   0
  -6   3  -1 1883.66    6.01   0
  -5 -22   9   -0.17    0.94   0
  -5 -21   8    0.38    1.06   0
  -5  -4   0    0.65    1.26   0
  -4 -17   5   42.54    1.57   0
  -4  -4   0  384.29    4.83   0
  -3 -22   9    5.20    0.82   0
  -3 -13   3  719.90    5.20   0
  -3   3  -1  105.91    2.10   0
  -3  15  -1  198.58    2.10   0
  -2  -7   1  867.64    8.70   0
  -2  13  -1 1282.39    4.83   0
  -2  28   2    0.91    0.81   0
  -1 -19   7   54.00    1.53   0
  -1 -16   5    1.10    1.04   0
  -1 -12   3  167.51    2.25   0
  -1  24   1    3.74    1.05   0
   0 -17   6   -0.53    0.93   0
   0  -5   1    2.41    1.05   0
   0  18   0  253.06    2.54   0
   0  29   3   -0.07    0.83   0
   1 -16   6   41.24    1.35   0
   1 -10   3  362.89    2.83   0
   1  15   0   -0.38    1.32   0
   1  25   2    0.72    0.93   0
   2 -20  10    6.29    0.78   0
   2 -19   9    0.44    0.79   0
   2 -15   6    2.41    1.06   0
   3 -19  10    4.57    0.66   0
   3  -3   2  332.01    3.30   0
   3  15   1  204.54    3.50   0
   3  21   2   62.21    1.78   0
   4 -10   5   64.19    1.39   0
   5 -17  11   18.04    0.90   0
   5 -16  10   22.21    0.96   0
   5 -12   7   11.57    0.80   0
   5 -10   6  262.10    2.21   0
   6 -14  10   -1.30    0.86   0
   6 -13   9    1.22    0.68   0
   6  -1   4  122.22    1.80   0
   6   8   3   66.25    2.11   0
   6   9   3  350.17    4.35   0
   7 -13  11   17.73    0.98   0
   7 -12  10    7.22    0.68   0
   7  -4   6    0.49    1.12   0
   8  -9  10   10.41    0.99   0
   8  -3   7  291.12    2.21   0
   9  -7  11    1.23    0.85   0
  10   4   9   -0.93    0.99   0
 -13  -4   3   11.49    1.24   0
 -13   1   2    0.08    1.10   0
 -12   3   1    5.12    1.07   0
 -12   4   1    0.51    0.79   0
 -12  14   1   -0.77    0.73   0
 -10  -7   2    1.05    1.11   0
 -10   3   0   46.74    1.56   0
  -9  -5   1   45.63    1.87   0
  -9   0   0    0.54    1.20   0
  -9  18   0    1.04    1.01   0
  -8   8  -1   37.29    1.33   0
  -8   9  -1    3.49    1.19   0
  -8  20   0    1.72    0.93   0
  -8  24   1   -0.39    0.67   0
  -7  -3   0    0.65    1.07   0
  -7   4  -1  109.48    1.74   0
  -7  25   1    3.34    0.70   0
  -6  16  -1   46.66    1.27   0
  -6  22   0   -0.94    0.81   0
  -5   2  -1  608.41    3.81   0
  -5  16  -1    0.95    0.94   0
  -5  22   0   -1.02    0.69   0
  -5  26   1   -0.40    0.88   0
  -4   2  -1  382.75    3.42   0
  -4  26   1    8.34    0.99   0
  -3 -15   4   33.15    1.50   0
  -3  16  -1    8.17    1.12   0
  -3  22   0    0.43    0.88   0
  -2 -10   2  124.14    2.49   0
  -2   4  -1  881.77    5.59   0
  -2  14  -1    8.86    1.19   0
  -1 -21   9   24.66    1.21   0
  -1 -20   8    1.42    0.91   0
  -1 -14   4  310.86    2.82   0
  -1   9  -1  297.71    3.03   0
  -1  10  -1  854.91    4.57   0
  -1  20   0    0.65    1.09   0
   0 -11   3   -0.12    1.04   0
   1  -7   2 1096.14    5.82   0
   2 -13   5   66.04    1.52   0
   2 -11   4  188.27    1.91   0
   2  19   1  495.65    3.86   0
   4  -4   3   10.46    1.02   0
   6  -7   6   78.64    1.49   0
   7 -10   9   -1.12    0.94   0
   7   0   5   -2.48    1.21   0
   8 -10  11   -0.12    0.82   0
   8  -5   8   -2.23    0.99   0
   9  -5  10    1.02    0.79   0
   9   6   7    0.56    1.19   0
   9  12   7    2.92    1.21   0
  10   1  10    3.82    0.92   0
  10   6   9    3.96    1.21   0
 -12  -3   2    9.61    1.12   0
 -11 -11   4   68.48    2.47   0
 -11  -1   1    3.95    1.25   0
 -10 -10   3    0.78    1.40   0
 -10  16   0  139.86    1.65   0
  -9  19   0   -0.91    0.87   0
  -8 -12   3    4.71    2.27   0
  -8  -2   0  484.99    3.62   0
  -8   6  -1   82.86    1.62   0
  -8   7  -1    2.35    1.25   0
  -8  11  -1   16.35    0.92   0
  -8  12  -1    4.75    1.08   0
  -7  15  -1   75.00    1.41   0
  -6   2  -1   44.74    1.47   0
  -6  26   1    7.09    0.72   0
  -5  17  -1    1.01    1.13   0
  -4  17  -1  140.49    1.81   0
  -3  26   1    5.14    0.93   0
  -2  15  -1  418.59    2.89   0
  -1   7  -1 1101.29    6.14   0
  -1   8  -1 1231.76    6.17   0
  -1  11  -1  377.21    3.01   0
  -1  28   2    3.64    1.01   0
   0 -22  11    0.51    0.77   0
   0 -18   7   58.98    1.30   0
   0 -15   5    0.00    1.10   0
   1 -14   5    1.84    1.08   0
   1 -12   4  648.05    3.44   0
   2 -16   7    4.70    1.01   0
   2  -5   2 2160.37    7.94   0
   3  -9   4    4.23    0.95   0
   3  25   3    2.82    1.05   0
   4 -18  11    4.50    0.74   0
   4 -17  10    5.25    0.91   0
   4 -16   9   -0.17    0.81   0
   4  -7   4    6.27    0.77   0
   4   1   2  205.10    2.72   0
   5 -13   8   -0.20    0.66   0
   5  -7   5   95.75    1.55   0
   5   0   3    3.07    1.12   0
   6  -9   7   66.89    1.37   0
   6   0   4   45.18    1.38   0
   7 -11  10    4.76    0.90   0
   7  -8   8   10.74    0.95   0
   7  -6   7    2.50    1.01   0
   8  16   6   73.78    2.42   0
   9  -6  11    1.32    0.83   0
   9   1   8    9.86    1.22   0
   9   9   7    9.89    1.34   0
   9  10   7    1.53    1.21   0
   9  11   7   -0.54    1.10   0
  10  -1  11   -0.23    0.86   0
  10   7   9    1.38    1.02   0
  10  10   9   11.80    1.25   0
  10  11   9    0.98    1.11   0
  10  12   9    1.85    0.86   0
 -13   0   2  140.89    2.16   0
 -12  -7   3   10.51    1.23   0
 -12   2   1   -0.19    1.15   0
 -11   6   0    0.25    0.97   0
 -11   7   0   -1.54    1.09   0
 -11   8   0   -0.92    0.83   0
 -11   9   0   -0.59    0.72   0
 -11  10   0   -1.83    0.69   0
 -11  11   0    1.12    0.72   0
 -11  12   0    0.93    0.98   0
 -11  13   0   -0.44    0.83   0
 -10  17   0    6.54    1.25   0
  -9 -18   7    1.84    1.59   0
  -8   5  -1   96.06    1.77   0
  -8  13  -1   12.89    0.87   0
  -8  14  -1   13.29    1.06   0
  -8  21   0    9.00    0.74   0
  -7   3  -1   17.19    1.22   0
  -7  16  -1    1.62    1.02   0
  -7  22   0    0.87    0.65   0
  -6  -4   0   20.72    1.36   0
  -6  17  -1    0.77    0.76   0
  -6  23   0    3.81    0.97   0
  -5 -15   4    1.64    1.61   0
  -5 -13   3   22.93    2.25   0
  -5  18  -1   69.75    1.34   0
  -5  23   0   -0.39    0.66   0
  -5  27   1    0.74    0.83   0
  -4 -15   4    0.60    1.28   0
  -4 -13   3   38.12    1.86   0
  -4  18  -1  205.70    2.00   0
  -4  23   0   54.40    1.10   0
  -3 -18   6    2.05    1.03   0
  -3   2  -1  319.39    3.50   0
  -3  17  -1  107.50    1.66   0
  -2 -22  10    0.49    0.86   0
  -2 -19   7   94.17    1.62   0
  -2  26   1   29.70    1.08   0
  -2  29   2    4.31    0.79   0
  -1  -6   1    3.21    1.65   0
  -1  12  -1  129.72    2.00   0
  -1  21   0    0.75    0.92   0
  -1  25   1   32.11    1.28   0
   0 -21  10    1.83    0.82   0
   0 -19   8   -0.91    0.96   0
   0 -13   4   -0.46    0.82   0
   0  19   0    0.11    1.13   0
   0  27   2    0.98    0.89   0
   1 -21  11    4.61    0.95   0
   1 -17   7    2.39    0.84   0
   1  -3   1 2192.68   10.57   0
   1  16   0   -0.31    1.08   0
   1  22   1   10.87    1.08   0
   3 -19  11   18.64    1.01   0
   3 -17   9   19.96    1.02   0
   3 -16   8   33.42    0.98   0
   3 -13   6    5.06    1.03   0
   3 -11   5    9.73    1.08   0
   3  -6   3 1352.76    5.48   0
   4 -13   7   11.23    1.06   0
   4  18   2   26.96    2.05   0
   5 -17  12   -0.58    0.59   0
   5 -16  11   -0.79    0.80   0
   5 -15  10   24.70    1.09   0
   5 -14   9   75.19    1.37   0
   5 -11   7   29.06    1.23   0
   5  -9   6  162.03    1.87   0
   5  -4   4   72.60    1.34   0
   5  23   4    2.14    1.46   0
   6 -15  12   12.12    0.92   0
   6 -12   9   49.74    1.21   0
   7 -13  12    5.22    0.74   0
   7 -12  11   13.46    0.83   0
   7  -3   6    4.11    1.09   0
   7   1   5   33.65    1.55   0
   8  -8  10    0.25    0.61   0
   8  -6   9    9.70    0.99   0
   8   3   6   30.89    1.42   0
   8  20   7    0.94    1.46   0
   9  -4  10    1.25    0.81   0
  10   2  10   24.96    1.07   0
 -13  -1   2    0.44    1.20   0
 -13   7   1    1.01    0.93   0
 -13   9   1   -0.26    1.01   0
 -13  10   1    9.60    1.08   0
 -12   1   1   82.99    1.66   0
 -11  -2   1   45.34    1.50   0
 -11   5   0   -0.09    1.09   0
 -11  14   0    0.91    0.95   0
 -10  -4   1  274.67    2.82   0
 -10   1   0    0.16    1.03   0
 -10  18   0    1.01    0.94   0
  -9  -1   0    0.05    1.22   0
  -9   9  -1   46.22    1.27   0
  -9  10  -1   50.48    1.27   0
  -9  11  -1   -0.54    0.89   0
  -9  20   0    0.38    0.65   0
  -8   4  -1   56.04    1.60   0
  -8  15  -1  159.00    1.78   0
  -8  22   0   14.74    0.93   0
  -7 -19   7   -0.15    1.17   0
  -7  17  -1   64.75    1.28   0
  -7  23   0    0.50    0.79   0
  -6 -18   6    0.72    1.12   0
  -6  18  -1    2.44    0.99   0
  -5   1  -1   25.83    1.09   0
  -4   1  -1  529.82    4.10   0
  -4  27   1    7.26    0.75   0
  -3  23   0   -0.40    0.79   0
  -3  27   1    0.14    0.77   0
  -2 -21   9   16.16    1.02   0
  -2 -20   8    6.27    0.90   0
  -2 -16   5    4.07    1.05   0
  -2  16  -1    0.43    1.11   0
  -1 -17   6  112.35    1.73   0
  -1  -9   2  221.26    3.02   0
  -1   6  -1    0.99    1.44   0
  -1  13  -1  606.39    3.61   0
   0 -20   9    0.21    0.63   0
   0  -8   2  985.10    5.56   0
   0  24   1   20.01    1.17   0
   1 -20  10   15.97    1.06   0
   1 -19   9   71.31    1.28   0
   1 -18   8   32.41    1.16   0
   1  26   2   21.88    1.13   0
   2 -20  11    0.36    0.68   0
   2 -19  10    1.19    0.85   0
   2 -18   9   82.59    1.38   0
   2 -17   8    0.77    0.75   0
   2  20   1   24.99    1.50   0
   3  16   1    7.00    1.62   0
   3  28   4   22.15    1.18   0
   4 -11   6    0.51    1.07   0
   4  -9   5  937.43    3.85   0
   4  26   4   -0.55    1.17   0
   5  19   3    0.16    1.65   0
   5  26   5   11.61    1.32   0
   6 -14  11    0.64    0.60   0
   6 -13  10   10.62    0.73   0
   6 -10   8    2.55    0.91   0
   6  -6   6   65.47    1.51   0
   7  -9   9    1.74    0.94   0
   8 -10  12   19.67    0.89   0
   8  -9  11    0.85    0.57   0
   8  -1   7    5.11    0.99   0
   8   4   6   13.81    1.46   0
   9  -5  11    3.73    0.85   0
   9  -1   9   25.36    1.15   0
   9   2   8    0.12    0.97   0
   9  17   8    9.03    1.46   0
  10   0  11    1.11    0.75   0
  10   3  10    2.27    0.92   0
 -13  -5   3    0.52    0.98   0
 -13   6   1   32.05    1.30   0
 -12  -4   2   24.00    1.29   0
 -11  -9   3    0.87    1.22   0
 -11  -6   2   -0.11    1.05   0
 -11   4   0    0.71    1.16   0
 -11  15   0    0.24    0.65   0
 -10  19   0    0.44    0.88   0
  -9   7  -1  116.31    1.76   0
  -9   8  -1   -0.34    0.86   0
  -9  12  -1    1.00    0.96   0
  -9  13  -1   27.71    1.16   0
  -9  21   0   -0.60    0.89   0
  -8  16  -1   22.88    1.19   0
  -7   2  -1   30.91    1.08   0
  -7  18  -1    1.27    1.05   0
  -6  19  -1   15.95    1.00   0
  -6  24   0    7.73    0.94   0
  -5 -18   6   39.74    1.59   0
  -5  -8   1  897.02   11.23   0
  -5  19  -1    0.59    0.93   0
  -4 -18   6    8.24    0.98   0
  -4  19  -1   23.41    1.22   0
  -4  24   0    1.51    0.93   0
  -3 -22  10    3.83    0.86   0
  -3 -19   7    0.02    1.05   0
  -3  18  -1    2.73    0.83   0
  -2  17  -1   95.31    1.72   0
  -2  23   0   27.24    1.13   0
  -1  14  -1  148.99    1.94   0
   0 -16   6   52.82    1.50   0
   1  17   0   -0.43    1.20   0
   1  29   3    4.01    0.86   0
   2 -14   6   37.49    1.21   0
   3 -14   7   58.89    1.43   0
   3  -2   2   25.69    1.51   0
   4 -18  12    0.37    0.60   0
   4 -17  11    4.58    0.83   0
   4 -14   8  111.66    1.35   0
   4  -3   3  542.57    3.54   0
   5 -12   8   -0.27    0.82   0
   6  -8   7  145.28    1.88   0
   6  -3   5  696.84    3.51   0
   6   1   4  130.16    1.90   0
   7 -10  10   14.14    0.88   0
   7  -7   8   22.16    1.00   0
   7  -5   7   12.11    0.89   0
   7  -2   6   25.21    1.35   0
   7   2   5   29.25    1.48   0
   8  -7  10    3.55    0.90   0
   8  -3   8   20.00    1.06   0
   8  15   6   24.96    1.79   0
   9  -6  12    1.27    0.82   0
   9  -3  10    0.79    0.77   0
   9   3   8    0.42    1.04   0
  10   1  11    0.82    0.84   0
 -13   4   1   17.10    1.08   0
 -13   5   1   -0.50    0.80   0
 -12 -10   4   12.32    1.49   0
 -12   0   1   -0.17    1.04   0
 -11   3   0    1.13    1.00   0
 -11  17   0   -1.48    0.97   0
 -10  20   0    3.06    0.80   0
  -9   6  -1    4.75    0.91   0
  -9  14  -1    0.51    0.83   0
  -9  15  -1    7.69    0.97   0
  -9  22   0    1.05    0.79   0
  -8  -3   0   11.01    1.35   0
  -8   3  -1   33.37    1.49   0
  -8  17  -1  197.27    1.90   0
  -7 -20   8    8.68    1.13   0
  -7  19  -1   13.22    1.00   0
  -5  20  -1    2.12    0.80   0
  -3 -21   9    0.55    0.89   0
  -3 -20   8    1.78    0.95   0
  -3  19  -1    0.99    1.00   0
  -2 -14   4  126.52    2.25   0
  -2 -12   3  108.83    2.09   0
  -2  27   1   -0.86    0.77   0
  -1 -21  10    0.03    0.84   0
  -1 -18   7   -0.82    1.67   0
  -1  15  -1  452.66    3.10   0
  -1  26   1   27.84    1.13   0
  -1  29   2   12.47    0.94   0
   0  20   0  141.74    1.92   0
   0  28   2   21.19    1.02   0
   1 -15   6   62.24    1.38   0
   1  23   1    0.77    1.62   0
   2 -12   5  174.26    1.86   0
   2 -10   4   36.26    1.21   0
   3 -19  12    5.11    0.78   0
   3   4   1 1080.03    9.45   0
   4 -16  10    0.86    0.74   0
   4 -15   9    9.50    0.71   0
   4  -6   4  140.75    1.86   0
   4  23   3    6.17    1.38   0
   5 -16  12   24.12    0.97   0
   5 -13   9    0.35    0.86   0
   5  -6   5   53.16    1.33   0
   5  -3   4   36.70    1.30   0
   6 -14  12    3.84    0.83   0
   6 -11   9   26.81    1.00   0
   6  23   5    3.90    2.35   0
   7 -12  12    8.07    0.69   0
   7 -11  11    7.40    0.64   0
   8  -9  12   -1.14    0.84   0
   8  -8  11   -0.57    0.74   0
   8  -5   9   43.72    1.32   0
   8   0   7    0.93    0.93   0
   8   5   6   55.46    1.63   0
   9  -4  11    0.78    0.81   0
   9   0   9   -0.44    0.96   0
   9   4   8   24.50    1.36   0
  10   2  11    2.60    0.85   0
  10   5  10    8.69    0.91   0
 -13  -2   2    0.60    1.03   0
 -12   8   0   35.43    1.12   0
 -12   9   0   52.81    1.32   0
 -12  10   0    4.63    1.00   0
 -12  11   0    8.54    0.97   0
 -12  12   0   -1.21    1.01   0
 -12  13   0   25.68    1.08   0
 -11  -3   1   46.88    1.46   0
 -11  18   0   -0.37    0.91   0
  -9  -9   2   12.86    1.59   0
  -9  -2   0    0.95    1.29   0
  -9   5  -1   44.99    1.25   0
  -8   2  -1    2.78    1.08   0
  -8  18  -1   42.08    1.26   0
  -7  -4   0   -0.36    1.04   0
  -7   1  -1  351.60    2.82   0
  -6 -19   7    4.22    1.14   0
  -6  20  -1   10.26    1.03   0
  -6  25   0   43.20    1.12   0
  -5   0  -1    0.48    1.02   0
  -5  25   0   -0.74    0.87   0
  -4 -19   7    5.12    1.04   0
  -4  20  -1   12.01    1.00   0
  -3  -4   0    0.40    1.71   0
  -3   1  -1  142.18    2.69   0
  -3  28   1    7.55    0.86   0
  -2  18  -1   28.49    1.32   0
  -1 -20   9   89.29    1.47   0
  -1 -19   8    7.58    1.05   0
  -1 -15   5   82.85    1.66   0
  -1   5  -1  325.13    3.92   0
   0 -21  11   -1.43    0.74   0
   0  25   1    0.36    0.91   0
   1  -9   3    1.48    0.90   0
   2 -15   7   39.86    1.26   0
   2  25   2   11.04    1.09   0
   2  28   3    5.03    1.02   0
   3 -18  11   16.11    0.87   0
   3 -17  10    0.39    0.84   0
   3 -15   8   38.86    1.09   0
   3  -8   4   22.08    1.16   0
   4 -12   7  230.20    2.16   0
   5 -15  11    5.78    0.67   0
   5 -14  10   23.90    0.95   0
   5 -10   7   16.98    0.92   0
   5  -8   6   36.65    1.29   0
   6 -13  11    4.61    0.63   0
   6 -12  10    4.20    0.64   0
   7  -8   9   43.28    1.15   0
   7  -4   7  115.68    1.76   0
   7   3   5  159.11    2.27   0
   8  -6  10   49.09    1.22   0
   8  14   6   77.30    2.40   0
   9  -5  12   20.25    0.91   0
   9  16   8    8.89    1.22   0
  10   6  10   -0.28    0.78   0
  10   7  10   -0.26    0.95   0
 -12  -1   1   90.01    1.68   0
 -12   6   0    1.29    0.97   0
 -12   7   0   27.79    1.25   0
 -12  14   0    5.78    1.09   0
 -12  15   0   18.67    0.99   0
 -11   2   0    1.13    1.24   0
 -10  -8   2    9.72    1.41   0
 -10  -5   1   46.68    1.59   0
 -10   8  -1    4.64    1.09   0
 -10   9  -1    1.78    1.04   0
 -10  10  -1   33.41    1.14   0
 -10  11  -1   21.15    0.97   0
 -10  12  -1   61.96    1.44   0
 -10  13  -1   14.18    1.09   0
  -9   4  -1   83.74    1.75   0
  -9  17  -1   -0.00    0.95   0
  -8  -7   1    1.11    1.42   0
  -8  19  -1    6.61    0.98   0
  -8  24   0    4.95    0.72   0
  -7  20  -1   12.85    0.78   0
  -7  25   0   -0.63    0.93   0
  -6 -21   9   -0.30    0.93   0
  -6 -20   8    0.14    0.95   0
  -6  -8   1   10.99    1.79   0
  -6   0  -1    0.42    1.08   0
  -6  21  -1   56.69    1.21   0
  -5 -21   9    3.16    0.93   0
  -5 -19   7    2.47    0.99   0
  -5  21  -1    2.22    1.08   0
  -4 -21   9   -0.51    0.82   0
  -4 -20   8    7.00    0.92   0
  -4  21  -1   -0.38    0.78   0
  -3 -16   5    4.75    1.17   0
  -3  20  -1   36.01    1.24   0
  -3  25   0   -0.07    0.84   0
  -2 -17   6   35.99    1.28   0
  -2  24   0   -1.84    0.97   0
  -1  16  -1   15.53    1.26   0
   0 -20  10  141.27    1.72   0
   0 -17   7   -1.49    0.83   0
   0 -14   5  378.12    2.77   0
   0  21   0    0.45    1.00   0
   1 -20  11   23.11    0.83   0
   1 -16   7   17.18    1.02   0
   1 -13   5  237.94    2.21   0
   1 -11   4  370.50    2.70   0
   1  18   0    0.28    1.20   0
   1  27   2    1.78    0.91   0
   2 -19  11    2.95    0.67   0
   2 -18  10    5.04    0.90   0
   2 -16   8    0.12    0.86   0
   2   0   1    1.41    0.82   0
   2  10   0 1526.43    9.42   0
   2  11   0  364.93    4.54   0
   3 -16   9    6.30    0.76   0
   3 -10   5   33.70    1.17   0
   3  26   3    5.40    1.11   0
   4 -17  12   -0.23    0.78   0
   4 -10   6   62.39    1.44   0
   4  -8   5  131.65    1.70   0
   6  -7   7   76.20    1.64   0
   6  -5   6   42.44    1.19   0
   6  -2   5   -0.27    1.09   0
   6   2   4   21.65    1.21   0
   7 -11  12    0.69    0.76   0
   7 -10  11   28.35    0.98   0
   7  -9  10    5.54    0.78   0
   7  -6   8   11.71    0.78   0
   8  -7  11    0.25    0.83   0
   8  -4   9    3.57    1.03   0
   8   1   7    4.63    1.02   0
   9  -3  11   18.91    0.97   0
   9   1   9   22.71    1.04   0
   9   5   8   -0.08    0.94   0
  10   3  11    4.60    0.79   0
  10   8  10    1.27    1.03   0
  10   9  10    0.89    0.96   0
 -12  -5   2   13.59    1.34   0
 -11   1   0   -0.13    1.02   0
 -10  -1   0   -0.42    1.15   0
 -10   7  -1   44.99    1.03   0
 -10  14  -1    3.58    0.72   0
 -10  15  -1    1.01    1.01   0
  -9   3  -1  147.94    2.07   0
  -8 -17   6   21.88    2.12   0
  -6  26   0    1.78    0.88   0
  -5 -20   8    4.44    0.93   0
  -5  10  -2  333.29    2.44   0
  -5  11  -2   43.67    1.28   0
  -5  26   0    0.67    0.88   0
  -4   0  -1    0.28    1.14   0
  -2  19  -1  458.21    3.21   0
  -2  28   1   -0.08    0.80   0
  -1 -13   4   27.09    1.21   0
  -1 -11   3    7.99    1.10   0
  -1  17  -1    5.51    1.15   0
  -1  23   0   -0.77    0.99   0
   0 -19   9    1.22    0.78   0
   0 -18   8    8.54    0.74   0
   0 -12   4    5.74    0.97   0
   0 -10   3 1150.43    5.16   0
   1 -19  10    0.19    0.78   0
   1 -18   9    1.10    0.93   0
   1 -17   8   80.44    1.43   0
   1  -6   2  140.59    2.38   0
   2 -17   9   52.34    1.26   0
   2  -7   3  606.20    3.70   0
   2  -4   2  134.23    2.36   0
   2  12   0  492.93    4.72   0
   3  -5   3  143.40    1.90   0
   4 -16  11    1.92    0.75   0
   4 -14   9    1.11    0.90   0
   4 -13   8    0.57    0.68   0
   4  -2   3   44.14    1.38   0
   5 -15  12    2.24    0.82   0
   5 -11   8   20.94    0.87   0
   5   2   3  324.76    3.14   0
   6 -13  12   -0.69    0.80   0
   6 -10   9    8.19    0.90   0
   7  17   5   23.71    2.35   0
   8  -8  12    4.70    0.57   0
   8   8   6    6.04    1.29   0
   8   9   6   49.00    1.75   0
   9  -4  12    2.09    0.83   0
   9  -1  10    0.76    0.66   0
   9   6   8    1.34    0.93   0
   9  15   8    1.35    1.01   0
  10   4  11    2.33    0.76   0
 -13   1   1    8.84    1.04   0
 -12   4   0   -0.06    1.05   0
 -11  -7   2   27.37    1.50   0
 -10   5  -1   39.69    1.40   0
  -8  21  -1   -1.08    0.80   0
  -7   0  -1    0.39    1.02   0
  -6   8  -2   70.53    1.47   0
  -6   9  -2  683.39    3.33   0
  -6  10  -2    4.84    0.95   0
  -6  11  -2  172.00    1.78   0
  -6  12  -2    2.99    0.92   0
  -6  13  -2  123.99    1.70   0
  -5   8  -2  118.75    1.69   0
  -5   9  -2  160.48    1.72   0
  -5  12  -2  184.26    1.88   0
  -5  13  -2    0.11    1.13   0
  -5  14  -2  601.88    3.17   0
  -5  22  -1   -0.46    0.94   0
  -4 -16   5   33.83    1.68   0
  -4  10  -2   24.92    1.18   0
  -4  11  -2  334.02    2.41   0
  -4  12  -2   10.83    1.10   0
  -4  22  -1   22.48    1.08   0
  -3 -10   2  748.89    6.38   0
  -3  21  -1    1.77    0.99   0
  -2 -20   9   -0.49    0.82   0
  -2 -19   8   32.19    1.30   0
  -2 -18   7    0.03    0.81   0
  -2  20  -1   23.69    1.16   0
  -2  25   0   57.18    1.26   0
   0  10  -1 2866.89    8.95   0
   0  11  -1    1.17    1.06   0
   0  12  -1 6660.02   12.81   0
   0  26   1   28.17    1.23   0
   0  29   2   -0.79    0.83   0
   1  19   0    0.37    1.29   0
   1  24   1    6.15    1.05   0
   2 -19  12    3.72    0.94   0
   2 -13   6  208.22    2.04   0
   2   9   0 3240.51   14.71   0
   2  13   0 1556.79    7.85   0
   3 -18  12    0.07    0.65   0
   3 -13   7  100.24    1.50   0
   3  23   2    2.55    1.11   0
   4  -5   4  167.30    2.17   0
   4  19   2  130.22    3.00   0
   5 -13  10    1.75    0.84   0
   5 -12   9    0.01    0.76   0
   5  -9   7    4.08    1.08   0
   5  -5   5   21.52    0.91   0
   5  -2   4  279.35    2.49   0
   6 -12  11    0.02    0.75   0
   6 -11  10   -0.70    0.75   0
   6   3   4   29.00    1.33   0
   7  -7   9   -0.52    0.89   0
   7  -5   8    1.17    0.94   0
   7   0   6    0.61    1.23   0
   8  -3   9  130.19    2.01   0
   8  10   6    1.12    1.10   0
   8  11   6    2.08    1.37   0
   8  12   6    2.07    1.24   0
   8  19   7    9.57    1.61   0
   9  14   8   -0.08    1.14   0
  10   5  11    1.22    0.77   0
 -13  10   0   -0.77    0.88   0
 -12  -2   1    1.50    1.06   0
 -12   3   0  105.15    1.70   0
 -11  -4   1   27.04    1.40   0
 -11   9  -1   22.72    1.09   0
 -11  10  -1    2.42    1.00   0
 -11  11  -1    4.12    1.03   0
 -11  12  -1    7.47    0.98   0
 -11  13  -1   37.17    1.17   0
 -10   4  -1  270.99    2.38   0
 -10  17  -1   13.66    0.81   0
 -10  18  -1    3.81    0.83   0
  -9  -3   0   -0.29    1.32   0
  -9   2  -1   39.33    1.57   0
  -9  20  -1   16.37    1.00   0
  -8 -10   2  118.98    3.40   0
  -8  -4   0  187.45    2.51   0
  -7   8  -2   29.85    1.28   0
  -7  10  -2    5.58    0.91   0
  -7  11  -2  126.91    1.62   0
  -7  12  -2    7.15    0.91   0
  -7  13  -2  169.41    1.82   0
  -7  14  -2   29.32    1.19   0
  -7  22  -1    3.36    0.65   0
  -6  -5   0  639.63    5.05   0
  -6  14  -2   78.24    1.43   0
  -6  15  -2   80.58    1.48   0
  -5  -5   0    0.03    1.22   0
  -5  15  -2   22.53    1.33   0
  -5  23  -1   10.51    0.98   0
  -4   8  -2    2.89    1.12   0
  -4   9  -2  713.82    3.54   0
  -4  13  -2   21.46    0.97   0
  -4  14  -2   99.10    1.68   0
  -3 -17   6  160.48    2.16   0
  -3 -14   4   -0.16    1.26   0
  -3  26   0   -1.26    0.90   0
  -1   4  -1  358.42    4.26   0
  -1  18  -1    1.07    1.12   0
  -1  24   0   -0.72    0.91   0
   0 -15   6    1.58    1.04   0
   0   9  -1    0.86    1.17   0
   0  13  -1    0.73    1.09   0
   0  22   0   33.53    1.25   0
   1 -14   6   31.40    1.28   0
   2 -11   5   66.99    1.33   0
   2  -9   4   33.78    1.23   0
   3 -17  11   20.10    0.92   0
   3 -16  10    5.91    0.90   0
   3 -14   8   -0.14    0.91   0
   3  -1   2   15.76    1.44   0
   5  -7   6   -0.03    0.79   0
   6  -6   7   65.57    1.44   0
   6  -4   6   31.94    1.04   0
   6  -1   5    8.69    1.12   0
   7 -10  12    3.69    0.73   0
   7  -9  11    6.42    0.93   0
   7  -8  10   23.99    0.86   0
   8  -7  12   10.63    0.83   0
   8  -6  11    0.36    0.56   0
   8   3   7  330.68    2.72   0
   9  -3  12    1.18    0.71   0
   9   3   9   38.50    1.19   0
   9  10   8   17.58    1.35   0
   9  11   8    4.32    1.23   0
   9  12   8    4.09    1.16   0
   9  13   8    3.13    1.03   0
 -13   0   1   -0.16    0.88   0
 -13   7   0    1.08    0.86   0
 -13   8   0    0.88    1.05   0
 -13   9   0   -0.19    0.75   0
 -11   0   0   -0.05    1.16   0
 -11   7  -1    7.13    0.99   0
 -11   8  -1    8.90    1.08   0
 -11  14  -1    3.60    0.67   0
 -11  15  -1    0.87    0.92   0
 -10  -2   0  100.48    1.81   0
 -10  19  -1    1.70    0.81   0
  -9  21  -1   10.48    0.88   0
  -8  11  -2  186.72    1.94   0
  -8  12  -2   24.90    1.25   0
  -8  13  -2   20.77    1.08   0
  -8  22  -1    4.55    0.91   0
  -7   7  -2    5.01    1.24   0
  -7  15  -2   27.14    1.14   0
  -7  23  -1    5.92    0.90   0
  -6 -16   5   20.79    1.54   0
  -6  -1  -1   58.55    1.57   0
  -6   6  -2   20.91    1.12   0
  -6  16  -2   31.47    1.30   0
  -6  23  -1    0.36    0.68   0
  -5 -16   5   10.09    1.32   0
  -5  -1  -1   27.08    1.32   0
  -5   6  -2 1050.73    4.36   0
  -4  15  -2  210.98    2.07   0
  -4  23  -1   13.92    1.16   0
  -3 -21  10   10.10    0.84   0
  -3  11  -2   31.52    1.14   0
  -3  12  -2  115.06    1.66   0
  -3  22  -1    8.03    1.00   0
  -2 -15   5   73.22    1.67   0
  -2  21  -1    0.08    0.91   0
  -2  29   1   33.44    1.05   0
  -1 -20  10   17.79    0.79   0
  -1 -17   7    2.20    0.95   0
  -1  28   1    5.15    0.82   0
   0 -20  11   10.63    0.75   0
   0   8  -1 2683.88   10.00   0
   0  14  -1   66.62    1.64   0
   1 -19  11   17.47    0.98   0
   1  28   2    3.84    0.80   0
   2 -18  11    3.94    0.78   0
   2 -14   7   57.79    1.43   0
   2  14   0  520.80    4.43   0
   2  22   1    5.46    0.96   0
   2  26   2    2.91    0.82   0
   3 -15   9   48.60    1.01   0
   3 -11   6   58.87    1.38   0
   3  -7   4 1100.57    4.44   0
   3  18   1    2.89    1.30   0
   4 -16  12   32.86    0.94   0
   4 -12   8    9.47    1.01   0
   4  -9   6  156.85    1.81   0
   4  -7   5 1243.98    4.33   0
   4  24   3   31.29    1.64   0
   4  27   4   -0.10    0.94   0
   5 -14  12   19.49    0.91   0
   5 -10   8   52.67    1.23   0
   6 -12  12    2.10    0.77   0
   6  -9   9    3.81    0.77   0
   7  -6   9    5.31    0.98   0
   7  -2   7   21.91    1.35   0
   8   0   8   60.46    1.33   0
   9  -1  11    2.21    0.88   0
   9   1  10    0.68    0.97   0
   9   4   9   33.04    1.20   0
 -13  -7   3    3.20    1.09   0
 -13  -4   2   10.63    1.12   0
 -13   6   0    0.72    0.92   0
 -12  -6   2   11.73    1.27   0
 -11   6  -1    7.73    1.13   0
 -11  16  -1    1.21    0.68   0
 -11  17  -1    1.69    0.87   0
 -10   3  -1   23.03    1.32   0
 -10  20  -1   15.00    0.93   0
  -9   1  -1   85.53    1.87   0
  -9  22  -1   -0.21    0.81   0
  -8   0  -1    1.33    1.17   0
  -8   8  -2   42.21    1.44   0
  -8   9  -2    6.35    0.98   0
  -8  14  -2    1.92    0.70   0
  -8  15  -2   26.56    1.16   0
  -7  -8   1  285.98    4.29   0
  -7   6  -2   21.39    1.28   0
  -7  16  -2   -0.18    0.73   0
  -7  17  -2   55.12    1.24   0
  -6  17  -2  143.98    1.50   0
  -6  24  -1   17.59    0.94   0
  -5  17  -2  152.01    1.78   0
  -5  24  -1   54.66    1.20   0
  -4 -21  10    8.36    1.04   0
  -4  16  -2  376.39    2.58   0
  -3 -20   9   19.07    0.98   0
  -3 -19   8    6.47    1.07   0
  -3 -12   3  226.45    2.95   0
  -3   9  -2   11.52    1.16   0
  -3  10  -2  792.87    3.89   0
  -3  13  -2   42.38    1.09   0
  -3  14  -2   60.56    1.44   0
  -3  27   0    1.19    0.78   0
  -2 -21  11    2.18    0.90   0
  -2  26   0    1.15    0.95   0
  -1 -19   9   61.70    1.12   0
  -1 -18   8   31.68    1.10   0
  -1  19  -1  486.56    3.25   0
   0 -19  10    0.50    0.79   0
   0 -16   7    5.99    1.03   0
   0  -7   2    0.28    1.08   0
   0  15  -1   -2.04    1.14   0
   1 -18  10    6.74    0.88   0
   1 -15   7   30.96    1.24   0
   1  20   0   -0.03    1.06   0
   1  25   1   39.31    1.36   0
   2 -17  10   97.43    1.39   0
   2 -16   9   -1.41    0.84   0
   2 -15   8   45.57    1.25   0
   2   8   0   12.13    2.23   0
   2  15   0  234.34    3.07   0
   3 -17  12    2.69    0.83   0
   3  -9   5   90.33    1.33   0
   3  27   3    3.87    1.03   0
   4 -15  11    6.54    0.70   0
   4 -14  10    1.60    0.89   0
   4 -13   9   42.86    1.05   0
   5 -13  11   13.48    0.88   0
   5 -11   9    3.64    0.78   0
   5  -4   5  163.95    1.82   0
   5  -1   4    0.29    1.07   0
   5  24   4   16.33    1.77   0
   6 -11  11    7.46    0.65   0
   6 -10  10   59.06    1.10   0
   7 -10  13    9.09    0.75   0
   7  -7  10   20.25    1.00   0
   7  -4   8    8.46    1.05   0
   8  -6  12   28.35    0.97   0
   8  -5  11   17.86    0.93   0
   8  -2   9    1.78    0.78   0
   8   4   7    1.18    1.06   0
   9  -2  12    7.91    0.76   0
   9   5   9   38.41    1.27   0
 -13   5   0    1.98    0.97   0
 -12  -3   1    6.34    1.11   0
 -11 -10   3    0.73    1.24   0
 -11  -1   0    0.82    1.03   0
 -11   5  -1   21.19    1.25   0
 -11  18  -1    3.16    0.91   0
 -10  -6   1   16.07    1.40   0
  -9  -7   1  104.10    2.24   0
  -9  10  -2    5.45    1.02   0
  -9  11  -2   14.60    1.11   0
  -9  12  -2    3.87    1.05   0
  -9  13  -2    2.12    0.96   0
  -8 -19   8    1.26    1.10   0
  -8 -18   7   19.79    1.45   0
  -8   7  -2    0.17    1.20   0
  -8  16  -2  189.32    1.88   0
  -7  -5   0    0.43    1.02   0
  -7  -1  -1  340.33    3.00   0
  -7   5  -2  598.24    3.34   0
  -7  18  -2    8.42    1.07   0
  -6   5  -2  135.80    1.65   0
  -6  18  -2    3.41    0.67   0
  -5   5  -2   19.26    1.26   0
  -5  18  -2   31.56    1.16   0
  -4 -17   6    5.76    1.10   0
  -4   6  -2   25.08    0.99   0
  -4  17  -2    6.90    0.97   0
  -4  24  -1   75.13    1.30   0
  -4  28   0   13.77    0.91   0
  -3   0  -1    1.80    1.29   0
  -3   8  -2  174.27    2.04   0
  -3  15  -2   31.64    1.38   0
  -3  23  -1   -2.07    1.11   0
  -2  22  -1    4.43    0.83   0
  -1 -14   5    1.85    1.05   0
  -1  20  -1  115.05    1.72   0
  -1  25   0    0.32    0.88   0
   0 -20  12    1.90    0.82   0
   0 -18   9   38.32    1.14   0
   0 -17   8   -2.36    0.93   0
   0  -4   1 3879.32   15.79   0
   0   7  -1    0.35    1.24   0
   0  16  -1  133.72    1.98   0
   0  23   0   -0.27    0.97   0
   0  27   1    0.13    0.88   0
   1 -17   9    4.02    0.86   0
   1 -16   8   16.74    0.95   0
   1 -12   5   33.09    1.00   0
   1  -8   3   26.98    1.20   0
   2 -18  12   -0.44    0.86   0
   3 -12   7   18.52    1.16   0
   3  -4   3  687.93    3.96   0
   4  -1   3   55.70    1.52   0
   5 -14  13    7.81    0.82   0
   5 -12  10    1.04    0.66   0
   5  -8   7  223.81    2.01   0
   5  -6   6  372.24    2.52   0
   6 -12  13   10.44    0.87   0
   6  -7   8    1.70    0.71   0
   6  -5   7   17.98    1.20   0
   6  -3   6   55.57    1.46   0
   6   0   5   -0.51    1.07   0
   7  -9  12    1.19    0.60   0
   7  -8  11   48.95    1.13   0
   7   7   5   20.96    1.66   0
   7  16   5   23.05    2.10   0
   8  -3  10   -0.23    0.87   0
   8   1   8   64.69    1.49   0
   8   5   7    4.80    1.24   0
   9   0  11    0.63    0.71   0
 -13  -1   1   11.50    1.09   0
 -13   4   0   -0.77    0.93   0
 -12   1   0  123.69    1.84   0
 -12   9  -1   12.86    0.93   0
 -12  10  -1    3.41    0.98   0
 -12  11  -1   14.79    1.09   0
 -12  12  -1    1.09    0.98   0
 -12  13  -1   32.21    1.18   0
 -12  14  -1    0.18    0.92   0
 -11 -12   4   19.14    2.34   0
 -11  -5   1   18.37    1.38   0
 -11   4  -1   27.05    1.25   0
 -10 -11   3   24.95    1.97   0
 -10   2  -1    7.97    1.16   0
  -9  -4   0   -0.90    1.41   0
  -9   8  -2    1.16    0.95   0
  -9   9  -2   17.64    1.17   0
  -9  14  -2   31.38    1.02   0
  -9  15  -2    6.61    1.08   0
  -8   6  -2  242.31    2.27   0
  -8  17  -2   11.63    0.83   0
  -8  18  -2    2.10    0.90   0
  -8  24  -1    1.23    0.88   0
  -7 -17   6    2.22    1.24   0
  -7  19  -2    9.91    0.97   0
  -7  25  -1    1.32    0.81   0
  -6   4  -2   66.98    1.46   0
  -6  19  -2   -0.75    0.96   0
  -6  25  -1    0.54    0.92   0
  -5  19  -2   -0.33    0.89   0
  -5  25  -1   -0.01    0.86   0
  -4 -20   9    0.68    0.82   0
  -4 -14   4   55.25    1.97   0
  -4  -1  -1  532.35    4.45   0
  -4  18  -2   27.08    1.28   0
  -3 -21  11    3.61    0.90   0
  -3  16  -2  532.06    3.14   0
  -2 -20  10    5.56    0.82   0
  -2 -16   6   87.38    1.71   0
  -2 -13   4    1.36    1.10   0
  -1 -20  11   24.88    1.08   0
  -1  29   1   19.57    0.98   0
   0 -13   5    1.20    0.88   0
   0  17  -1   -0.33    1.09   0
   1 -19  12   21.88    0.95   0
   1 -10   4   18.22    1.05   0
   1  -2   1  271.11    4.19   0
   1  21   0    0.94    1.16   0
   2 -12   6   47.32    1.39   0
   2  16   0  708.47    5.00   0
   2  23   1    6.78    1.72   0
   3 -16  11    1.30    0.70   0
   3 -15  10   17.84    0.94   0
   3 -13   8    2.22    0.98   0
   3   5   1  499.05    7.25   0
   3  24   2   -1.28    1.11   0
   4 -15  12   -1.28    0.72   0
   4 -10   7   43.07    1.22   0
   4  -4   4  828.15    4.04   0
   4  20   2    5.45    1.48   0
   5  20   3  104.19    3.89   0
   6 -11  12   37.17    1.02   0
   6  -8   9    5.41    0.85   0
   7  -9  13    8.27    0.85   0
   7  -1   7   37.49    1.42   0
   7   2   6   25.22    1.37   0
   8  -6  13    0.66    0.73   0
   8  -5  12    9.09    0.82   0
   8  -4  11    3.98    0.84   0
   8  -1   9    7.48    0.93   0
   8  18   7   19.44    1.61   0
   9  -1  12   12.92    0.83   0
   9   1  11    1.66    0.82   0
   9   3  10    2.68    1.23   0
   9   6   9    0.58    0.86   0
 -12  -9   3    6.29    1.32   0
 -12   7  -1    1.16    0.91   0
 -12   8  -1    4.04    1.02   0
  -9   0  -1    0.29    1.33   0
  -9   7  -2   -0.60    1.13   0
  -9  16  -2   74.18    1.22   0
  -9  17  -2   61.25    1.25   0
  -8  -1  -1  266.61    2.68   0
  -8   5  -2  631.72    3.29   0
  -8  19  -2   10.70    0.99   0
  -7   4  -2   74.80    1.56   0
  -7  20  -2    1.54    0.86   0
  -6  20  -2    8.84    1.05   0
  -5 -20   9    1.77    0.92   0
  -5 -17   6    0.08    1.06   0
  -5   4  -2  153.48    1.99   0
  -4 -19   8    9.74    0.97   0
  -4 -18   7   23.66    1.21   0
  -4   5  -2  659.66    3.78   0
  -4  19  -2  139.18    1.65   0
  -4  25  -1    4.86    0.94   0
  -3  17  -2    1.43    1.14   0
  -3  24  -1   25.63    1.11   0
  -3  28   0   -0.82    0.87   0
  -2 -19   9    0.19    0.87   0
  -2  -9   2   52.78    1.73   0
  -2  11  -2  492.74    3.20   0
  -2  13  -2  330.79    2.55   0
  -2  23  -1   12.99    1.03   0
  -2  27   0   16.52    1.04   0
  -1  -8   2   65.22    1.89   0
  -1  21  -1   90.29    1.53   0
   0 -19  11   -1.15    0.84   0
   0  24   0   62.55    1.43   0
   1 -18  11    4.74    0.86   0
   1  29   2   10.55    0.93   0
   2 -17  11    5.35    0.83   0
   2  -3   2  409.75    3.84   0
   2  27   2   43.67    1.42   0
   3 -14   9   17.24    0.89   0
   3 -10   6  137.10    1.69   0
   3  19   1    2.94    1.37   0
   4 -14  11    0.12    0.84   0
   4 -11   8  209.63    1.88   0
   4  -8   6   -0.22    0.94   0
   4   4   2    1.03    1.09   0
   5 -13  12    0.23    0.54   0
   5  -9   8   15.52    0.84   0
   6 -10  11    5.93    0.84   0
   6  -9  10    8.51    0.86   0
   7  -8  12    5.96    0.83   0
   7  -7  11   17.25    0.99   0
   7  -6  10    0.02    0.91   0
   7  -3   8   82.38    1.33   0
   7   8   5    3.98    1.26   0
   8   6   7    9.22    1.20   0
   9   0  12    1.26    0.79   0
   9   7   9    8.29    0.90   0
 -13  -5   2    1.53    1.34   0
 -13   3   0   -0.18    1.00   0
 -12 -11   4    2.13    1.22   0
 -12   6  -1   10.44    1.03   0
 -11  -8   2   26.32    1.39   0
 -11  -2   0    0.35    1.02   0
 -11   3  -1   52.94    1.52   0
 -10  -9   2    0.84    1.43   0
 -10  10  -2   15.03    1.21   0
 -10  11  -2    9.70    1.09   0
 -10  12  -2   57.94    1.12   0
 -10  13  -2   25.74    1.14   0
 -10  14  -2   51.99    1.31   0
 -10  15  -2   12.65    1.02   0
  -9   6  -2   12.82    1.24   0
  -9  18  -2   -0.98    0.98   0
  -8  -5   0  115.33    2.35   0
  -8  20  -2    5.67    0.93   0
  -7 -19   8    9.92    1.13   0
  -7 -18   7    7.42    1.28   0
  -6 -20   9    0.13    0.83   0
  -6 -17   6  150.93    2.54   0
  -6  -2  -1   41.87    1.60   0
  -6  21  -2    3.88    0.93   0
  -6  26  -1    8.75    0.95   0
  -5 -19   8    8.88    1.06   0
  -5 -18   7    5.75    1.25   0
  -5  26  -1    0.24    0.87   0
  -4  -5   0   18.43    1.88   0
  -4  20  -2    5.08    0.90   0
  -3 -15   5   46.09    1.46   0
  -3   6  -2  323.02    2.84   0
  -3  18  -2    4.75    1.20   0
  -2 -18   8   71.65    1.41   0
  -2 -17   7  135.68    1.76   0
  -2 -11   3    5.96    1.13   0
  -2   1  -1  352.39    4.34   0
  -2  10  -2  126.25    1.83   0
  -2  14  -2   67.00    1.51   0
  -2  15  -2    7.26    1.02   0
  -1 -19  10   -0.69    0.78   0
  -1 -15   6   61.22    1.42   0
  -1 -12   4  639.58    3.69   0
  -1   3  -1 2370.73   11.29   0
  -1  26   0   -0.87    0.88   0
   0 -11   4   -0.08    0.85   0
   0  -9   3    0.19    0.93   0
   0  18  -1  124.00    1.91   0
   0  28   1   21.64    1.03   0
   1 -13   6   33.69    1.25   0
   1  -5   2 1043.73    6.10   0
   1  26   1   27.80    1.19   0
   2 -16  10   99.09    1.44   0
   2 -13   7  329.24    2.37   0
   2 -10   5   14.83    0.77   0
   2  -8   4    1.32    0.89   0
   2  17   0   51.16    1.90   0
   3 -16  12   11.93    0.79   0
   3  -6   4   24.52    1.10   0
   4 -15  13    5.58    0.78   0
   4 -13  10    4.23    1.20   0
   4 -12   9   29.00    0.99   0
   5 -13  13   10.82    0.88   0
   5 -12  11   24.84    0.83   0
   5 -11  10    6.98    0.86   0
   5 -10   9   31.00    0.87   0
   5  -7   7    4.51    1.07   0
   5  -3   5  232.49    2.13   0
   5   0   4 1488.27    5.54   0
   6 -11  13    2.21    0.73   0
   6  -6   8   13.27    1.22   0
   6  -2   6   83.49    1.66   0
   6   1   5    9.56    1.11   0
   7   3   6    7.78    1.23   0
   7   9   5    3.63    1.42   0
   7  15   5  139.64    3.19   0
   7  21   6   35.46    2.62   0
   8  -5  13   -1.10    0.76   0
   8  -3  11    1.42    0.84   0
   8  -2  10    9.29    0.78   0
   8   0   9   -1.66    0.95   0
   8  17   7    0.66    1.23   0
   9   2  11    9.40    0.91   0
   9   4  10    1.02    0.80   0
   9   8   9    1.26    0.90   0
   9  15   9    0.40    1.12   0
 -13  -2   1   19.27    1.18   0
 -13   2   0   -1.08    0.96   0
 -12  -4   1    0.25    1.00   0
 -12   5  -1   -1.03    0.89   0
 -10   8  -2   11.38    1.14   0
 -10  16  -2    0.57    0.94   0
 -10  17  -2    6.07    0.86   0
  -9   5  -2   18.40    1.20   0
  -9  19  -2   -1.33    0.89   0
  -8  -8   1   33.83    1.92   0
  -8   4  -2   -0.58    1.25   0
  -8  21  -2    7.21    0.86   0
  -7  -2  -1   31.18    1.34   0
  -7   3  -2  104.98    1.74   0
  -7  21  -2    5.21    0.73   0
  -6 -19   8    0.92    0.96   0
  -6 -18   7   16.91    1.23   0
  -6   3  -2  209.03    2.22   0
  -5  21  -2   -0.24    0.72   0
  -4   4  -2    1.49    1.03   0
  -4  26  -1   15.23    1.01   0
  -3 -20  10    5.64    0.78   0
  -3  19  -2  272.73    2.24   0
  -3  25  -1    0.27    0.91   0
  -2 -20  11    3.94    0.84   0
  -2   9  -2   57.14    1.44   0
  -2  16  -2   69.98    1.63   0
  -2  28   0    3.29    0.82   0
  -1 -20  12   27.28    0.99   0
  -1 -18   9    2.83    0.86   0
  -1 -16   7   16.10    1.11   0
  -1 -10   3  349.47    3.17   0
  -1  22  -1    7.49    0.94   0
   0 -18  10   16.89    0.90   0
   0 -14   6  621.16    3.31   0
   1 -17  10   19.86    0.95   0
   1 -14   7    8.42    1.05   0
   1  22   0   -1.24    1.25   0
   2 -17  12    1.27    0.79   0
   2 -15   9   47.06    0.96   0
   2 -14   8    3.95    0.71   0
   3 -15  11    5.98    0.85   0
   3  -8   5    0.43    0.65   0
   3   0   2   32.89    1.71   0
   3  28   3    1.49    0.95   0
   5  -5   6   50.37    1.30   0
   6 -10  12    5.66    0.86   0
   6  -4   7    1.22    0.80   0
   7  -8  13    5.51    0.71   0
   7  -4   9    5.71    0.63   0
   7  -2   8    7.85    1.07   0
   7  10   5    1.06    1.35   0
   7  14   5    0.34    1.38   0
   8  -4  12   21.92    1.27   0
   8   3   8   17.19    1.02   0
   9   1  12   12.96    0.93   0
   9   5  10    1.29    0.90   0
   9  11   9   -0.16    1.14   0
   9  12   9    2.38    1.16   0
   9  13   9    8.99    1.26   0
   9  14   9    0.81    1.16   0
 -13  -8   3    1.99    1.16   0
 -13   9  -1   -0.54    0.87   0
 -12  -7   2    1.03    1.17   0
 -11   2  -1   51.51    1.49   0
 -10   7  -2    2.05    0.99   0
 -10  18  -2   42.66    1.16   0
  -9  -1  -1   82.06    1.88   0
  -9  20  -2    1.80    0.66   0
  -7  22  -2    4.20    1.03   0
  -6  22  -2   29.56    0.93   0
  -5 -14   4  437.15    4.40   0
  -5  -2  -1  571.86    4.23   0
  -5   3  -2   29.73    1.07   0
  -5  22  -2    4.89    1.02   0
  -5  27  -1   -0.15    0.88   0
  -4 -12   3    0.45    1.27   0
  -4  21  -2   16.14    0.84   0
  -3 -19   9    9.46    0.95   0
  -3  20  -2   45.65    1.21   0
  -2   8  -2   45.62    1.43   0
  -2  17  -2   17.75    1.30   0
  -2  24  -1    2.17    0.72   0
  -1 -17   8   79.02    1.39   0
  -1  27   0   -1.10    0.78   0
   0 -19  12    0.08    0.73   0
   0 -17   9   -1.17    0.94   0
   0 -16   8  146.31    1.65   0
   0 -15   7   -0.53    1.06   0
   0  19  -1    0.47    1.12   0
   0  25   0    0.43    0.92   0
   1 -18  12    2.19    0.78   0
   1 -16   9    6.63    0.90   0
   1 -15   8   88.31    1.48   0
   2  24   1    3.99    1.10   0
   3 -16  13   -1.16    0.73   0
   3 -14  10   91.89    1.43   0
   3 -11   7    9.31    1.01   0
   3  20   1   40.64    1.81   0
   4 -14  12    5.11    0.61   0
   4  -9   7  213.63    2.05   0
   4  -3   4  198.70    2.11   0
   4   0   3    0.26    1.01   0
   4  25   3   16.81    1.40   0
   5 -12  12    7.27    0.75   0
   5  -8   8   -1.10    1.05   0
   6  -9  11   -0.52    0.59   0
   6  -8  10    2.88    0.83   0
   7  -7  12   12.21    0.77   0
   7  -6  11    0.20    0.81   0
   7  -5  10   59.80    1.19   0
   7   4   6    2.00    1.18   0
   7  11   5   15.60    1.39   0
   7  12   5    4.08    1.28   0
   7  13   5    3.70    1.32   0
   8  -1  10    0.49    0.64   0
   8   1   9    6.52    0.93   0
   8  16   7    4.80    1.31   0
   9   3  11   13.25    0.76   0
   9   6  10    1.26    0.87   0
 -13   1   0    0.72    0.87   0
 -13   8  -1   11.14    1.14   0
 -12  -1   0  123.01    1.84   0
 -12   4  -1    0.03    1.06   0
 -11  10  -2    2.97    1.04   0
 -11  11  -2    2.24    1.01   0
 -11  12  -2    0.06    0.69   0
 -11  13  -2   13.23    0.83   0
 -11  14  -2    0.10    0.71   0
 -11  15  -2    3.44    0.91   0
 -11  16  -2    8.05    0.89   0
 -10 -13   4    0.55    2.05   0
 -10  -4   0    3.97    1.35   0
 -10   0  -1    0.38    1.05   0
 -10   6  -2  107.14    1.55   0
 -10  19  -2   -1.04    0.73   0
  -9   4  -2   14.93    1.36   0
  -9  21  -2    0.66    0.64   0
  -8  -2  -1    3.46    1.16   0
  -8   3  -2    0.47    1.25   0
  -7 -14   4   20.42    2.09   0
  -7  23  -2   -1.05    0.93   0
  -6  23  -2   25.87    1.04   0
  -5  23  -2   13.39    0.89   0
  -4 -20  10   12.43    0.96   0
  -4  22  -2   52.69    1.34   0
  -4  27  -1    8.28    0.88   0
  -3 -18   8    5.76    1.07   0
  -3 -16   6   55.61    1.40   0
  -3   5  -2    1.84    0.88   0
  -3  26  -1    6.11    0.94   0
  -2 -14   5  424.92    3.17   0
  -2  18  -2   13.09    1.23   0
  -1 -19  11   20.44    0.97   0
   0  29   1    0.06    0.76   0
   1 -11   5    0.86    0.65   0
   1  27   1    3.48    0.96   0
   2 -17  13   -2.11    1.03   0
   2 -16  11   14.56    0.93   0
   2 -11   6  257.07    2.18   0
   2  18   0    0.44    1.15   0
   2  28   2    4.01    1.00   0
   3 -13   9   21.59    0.93   0
   3 -12   8   47.07    1.12   0
   3  -3   3    1.18    0.80   0
   3  25   2   28.05    1.41   0
   4 -14  13    2.94    0.81   0
   4 -13  11   -0.56    0.61   0
   4 -10   8   -1.34    1.12   0
   4  -7   6  108.59    1.57   0
   5 -11  11   11.44    0.81   0
   5 -10  10   10.86    0.90   0
   5  -9   9    0.43    0.88   0
   6  -5   8  629.72    3.23   0
   6   2   5   -0.68    1.07   0
   6   7   4   74.27    2.14   0
   7  -3   9   14.75    0.99   0
   7   1   7   36.77    1.42   0
   8  -4  13   20.63    0.74   0
   8  -3  12    3.85    0.66   0
   8  -2  11    4.25    0.62   0
   8  10   7   49.06    1.80   0
   8  15   7   83.05    2.24   0
   9   2  12    6.02    0.65   0
   9   4  11    1.20    0.79   0
   9   7  10    4.18    0.92   0
 -13  -3   1    1.72    0.99   0
 -13   7  -1    3.05    1.00   0
 -12   3  -1    7.87    1.04   0
 -11  -6   1   13.58    1.38   0
 -11  -3   0    1.02    1.09   0
 -11   1  -1    4.26    1.19   0
 -11   8  -2   30.17    1.17   0
 -11  17  -2   26.79    1.12   0
 -10  -7   1   44.75    1.56   0
 -10   5  -2    0.52    1.06   0
 -10  20  -2   17.97    0.83   0
  -9 -10   2    5.03    1.51   0
  -9  -5   0   -0.67    1.44   0
  -9  22  -2    2.25    0.95   0
  -8  23  -2   -0.22    0.97   0
  -7   2  -2   33.71    1.29   0
  -6 -14   4   12.92    1.74   0
  -6   2  -2  443.48    3.09   0
  -6  12  -3   78.05    1.51   0
  -6  13  -3   99.62    1.59   0
  -6  24  -2   -0.10    0.80   0
  -4 -15   5    3.52    1.35   0
  -4 -10   2   23.51    1.90   0
  -4   3  -2  177.03    2.27   0
  -3 -20  11    0.90    0.86   0
  -3 -17   7   14.85    0.99   0
  -3  21  -2   70.19    1.36   0
  -2 -19  10    1.05    0.76   0
  -2   7  -2  243.10    2.77   0
  -2  19  -2   77.66    1.59   0
  -2  25  -1   30.78    1.10   0
  -2  29   0   36.76    1.19   0
  -1  23  -1    2.32    0.99   0
   0 -18  11    6.92    0.87   0
   0 -12   5   54.97    1.35   0
   0  20  -1   31.50    1.28   0
   1 -18  13   -0.87    0.70   0
   1 -17  11   40.35    1.06   0
   1  -9   4  119.81    1.78   0
   1  -7   3   85.43    1.78   0
   1  23   0   -0.01    0.97   0
   2 -15  10    0.17    0.97   0
   3 -15  12   11.54    0.82   0
   3  -9   6  116.20    1.54   0
   4 -12  10   14.66    0.76   0
   4 -11   9    1.59    0.66   0
   4  -5   5   89.10    1.49   0
   4   5   2  703.99    5.80   0
   4  21   2   16.50    1.59   0
   5 -12  13    1.75    0.61   0
   5  -6   7   13.45    1.13   0
   5  -2   5   27.68    1.12   0
   5   1   4    1.60    1.04   0
   6  -9  12   36.36    1.06   0
   6  -6   9   65.10    1.27   0
   6  -3   7   -0.54    0.76   0
   7  -7  13    0.95    0.53   0
   7  -6  12   10.14    0.88   0
   7  -1   8   12.05    1.00   0
   7   5   6  441.91    3.46   0
   8   0  10   26.86    1.06   0
   8   2   9    3.46    0.98   0
   8   5   8    0.49    1.08   0
   8  11   7    5.19    1.27   0
   8  12   7   18.34    1.53   0
   8  13   7   73.02    2.05   0
   8  14   7   14.93    1.40   0
   9   3  12   -1.79    0.78   0
   9   8  10   -0.21    0.89   0
 -13  -6   2   23.23    1.26   0
 -13   6  -1   30.24    1.26   0
 -12  -5   1   -1.59    1.09   0
 -11   7  -2   30.18    1.33   0
  -9   3  -2   22.85    1.40   0
  -8   2  -2   13.64    1.35   0
  -8  12  -3    5.46    0.98   0
  -8  13  -3   69.68    1.29   0
  -8  14  -3   45.00    1.14   0
  -7  10  -3   98.88    1.68   0
  -7  11  -3   11.63    1.33   0
  -7  12  -3    0.56    0.85   0
  -7  13  -3  111.70    1.49   0
  -7  14  -3   22.19    0.94   0
  -7  16  -3   54.89    1.22   0
  -7  24  -2   -0.40    0.68   0
  -6  10  -3  120.09    1.79   0
  -6  11  -3    9.54    0.94   0
  -6  14  -3   58.95    1.27   0
  -5 -20  10    0.31    0.75   0
  -5   2  -2  380.78    2.92   0
  -5  12  -3  536.39    3.00   0
  -5  13  -3   23.48    1.34   0
  -5  14  -3    0.92    1.18   0
  -5  24  -2    1.19    0.93   0
  -4 -19   9   23.53    1.10   0
  -4  23  -2    6.84    0.99   0
  -4  28  -1   16.74    0.89   0
  -3 -13   4  478.45    3.86   0
  -3  22  -2  109.41    1.55   0
  -3  27  -1    0.34    0.75   0
  -2 -18   9   81.92    1.43   0
  -1 -18  10    3.65    0.89   0
  -1 -13   5   64.52    1.44   0
  -1  13  -2 1341.84    5.21   0
  -1  28   0   -0.47    0.76   0
   0  26   0   28.75    1.16   0
   1 -12   6  329.53    2.52   0
   2 -16  12    9.98    0.88   0
   2 -14   9   20.91    0.97   0
   2 -13   8   46.61    1.34   0
   2 -12   7   17.74    0.94   0
   2  -9   5    1.55    0.92   0
   2  -5   3    0.37    1.21   0
   2  19   0  272.92    3.20   0
   3 -15  13    0.35    0.83   0
   3 -14  11   53.25    1.17   0
   4 -13  12    0.30    0.76   0
   5 -11  12    4.55    0.86   0
   5  -4   6  351.90    2.49   0
   6  -8  11   10.86    0.72   0
   6  -7  10   43.19    1.10   0
   6  18   4   10.60    2.49   0
   7  -5  11    0.45    0.65   0
   7   2   7   20.67    1.34   0
   8  -3  13   -0.80    0.58   0
   8  -2  12   -1.00    0.68   0
   8  -1  11    0.59    0.75   0
   9   9  10    0.05    0.89   0
 -13   0   0   -0.36    0.95   0
 -13   5  -1   -0.05    1.06   0
 -12  -2   0   33.83    1.31   0
 -12   2  -1    1.72    0.91   0
 -12  10  -2    6.18    0.90   0
 -12  11  -2   42.14    1.21   0
 -12  12  -2    3.26    0.97   0
 -12  13  -2    0.43    0.73   0
 -12  14  -2    0.75    0.71   0
 -11   6  -2    1.77    1.04   0
 -10  -1  -1   97.75    1.75   0
 -10   4  -2   67.10    1.48   0
  -9  -2  -1   36.00    1.57   0
  -8  10  -3   13.20    1.20   0
  -8  11  -3   69.10    1.27   0
  -8  16  -3   29.98    1.22   0
  -8  17  -3   64.99    1.59   0
  -7  -6   0    0.43    1.21   0
  -7   9  -3  214.27    2.05   0
  -7  17  -3   28.12    1.19   0
  -7  18  -3    2.82    0.93   0
  -7  25  -2   11.38    0.94   0
  -6  -6   0   40.42    1.72   0
  -6   9  -3  351.24    2.52   0
  -6  17  -3   13.22    1.04   0
  -6  18  -3   33.14    1.05   0
  -6  25  -2   47.10    1.23   0
  -5  10  -3  479.57    2.81   0
  -5  11  -3  110.28    1.56   0
  -5  15  -3   53.31    1.24   0
  -5  16  -3    1.35    1.11   0
  -4 -18   8   30.92    1.26   0
  -4  -2  -1  390.92    4.11   0
  -4  24  -2    3.40    0.82   0
  -3  -1  -1  137.29    2.82   0
  -3   4  -2 1303.38    5.99   0
  -2 -17   8   -0.03    0.84   0
  -2 -16   7    5.20    1.13   0
  -2 -15   6    3.15    1.02   0
  -2  20  -2   68.67    1.51   0
  -2  26  -1   33.72    1.15   0
  -1 -19  12   21.06    0.95   0
  -1  -5   1  313.22    5.13   0
  -1  11  -2   33.52    1.34   0
  -1  12  -2    1.47    1.04   0
  -1  14  -2  110.43    1.73   0
  -1  15  -2   60.79    1.47   0
  -1  24  -1    9.32    1.03   0
   0 -18  12   85.32    1.38   0
   0 -17  10   -0.86    0.82   0
   1 -17  12   18.57    0.95   0
   1 -16  10    5.25    0.68   0
   1  12  -1  131.99    2.27   0
   1  13  -1  606.54    4.22   0
   1  14  -1  148.86    2.20   0
   1  15  -1  469.42    3.74   0
   2  -7   4   41.78    1.22   0
   2  25   1   26.80    1.21   0
   3 -13  10   15.83    0.95   0
   3 -10   7   17.22    1.17   0
   3  -7   5    1.15    0.63   0
   3  -5   4   44.39    1.11   0
   4 -12  11    5.92    0.92   0
   4  -8   7    4.48    1.05   0
   5 -10  11   31.52    1.07   0
   5  -7   8   79.91    1.44   0
   5   6   3  149.82    2.58   0
   5  25   4    5.44    1.52   0
   6  -9  13   15.82    0.70   0
   6  -4   8   13.38    1.21   0
   6   3   5  679.97    3.95   0
   6   8   4    9.32    1.40   0
   7  -6  13    2.12    0.71   0
   7  -2   9    7.13    0.84   0
   7   0   8   32.44    1.21   0
   8   3   9  153.67    2.02   0
   8   6   8   48.50    1.51   0
   9   4  12    1.76    0.61   0
   9   6  11    0.37    0.75   0
   9  10  10   -0.00    0.81   0
 -13   4  -1   17.63    1.05   0
 -12   9  -2   16.48    1.18   0
 -11   0  -1    0.31    1.13   0
 -11   5  -2   10.76    1.07   0
  -9 -16   6   -0.13    1.41   0
  -9  -8   1    2.26    1.24   0
  -9   2  -2  151.91    2.06   0
  -9  11  -3   24.32    1.16   0
  -9  12  -3   73.81    1.43   0
  -9  13  -3  111.54    1.46   0
  -9  14  -3   -0.04    0.80   0
  -9  15  -3   43.08    1.26   0
  -9  16  -3    4.69    1.02   0
  -8   9  -3  116.83    1.54   0
  -8  18  -3    8.09    1.02   0
  -7  -3  -1   18.06    1.22   0
  -7   1  -2    2.71    1.07   0
  -7   8  -3  115.05    1.74   0
  -7  19  -3   15.53    1.04   0
  -6  -3  -1 1790.25    7.05   0
  -6   1  -2  323.80    2.72   0
  -6  19  -3   63.41    1.39   0
  -5 -19   9    2.01    0.92   0
  -5   9  -3  154.04    1.79   0
  -5  17  -3    4.67    0.85   0
  -5  18  -3   53.37    1.27   0
  -5  25  -2   14.38    0.79   0
  -4 -20  11    5.73    0.84   0
  -4 -17   7    2.18    1.02   0
  -4 -16   6  192.42    2.29   0
  -4  12  -3   -0.52    1.08   0
  -4  13  -3   40.46    1.38   0
  -4  14  -3   -1.90    1.19   0
  -3 -19  10    4.80    0.85   0
  -3  23  -2    4.09    0.99   0
  -3  28  -1    6.40    0.83   0
  -2 -19  11    4.03    0.87   0
  -2   6  -2  659.17    4.27   0
  -2  21  -2  130.41    1.70   0
  -1 -17   9    1.65    0.87   0
  -1 -14   6   30.03    1.28   0
  -1  10  -2  176.50    2.17   0
  -1  16  -2  126.49    1.96   0
  -1  17  -2  339.92    2.73   0
   0 -16   9    3.08    0.86   0
   0 -13   6    0.86    1.01   0
   0 -10   4  199.68    2.21   0
   0  -6   2 1015.92    6.25   0
   1 -15   9   69.23    1.14   0
   1 -14   8    2.83    1.01   0
   1 -13   7   11.51    1.01   0
   1  11  -1  391.80    3.67   0
   1  16  -1   16.51    1.36   0
   1  24   0   -0.15    0.97   0
   1  28   1    5.78    0.93   0
   2 -16  13    5.21    0.84   0
   2 -15  11    0.88    0.84   0
   2  20   0  230.60    2.77   0
   3 -12   9   83.42    1.35   0
   3 -11   8   80.48    1.48   0
   3  26   2    5.82    1.04   0
   4 -13  13   32.85    0.83   0
   4 -11  10   80.23    1.22   0
   4  -9   8    0.03    1.00   0
   4  -2   4   44.25    1.31   0
   4   1   3   60.24    1.59   0
   5 -11  13    1.04    0.53   0
   5  -9  10    1.76    0.57   0
   5  -8   9  149.06    1.54   0
   6  -9  14    0.21    0.63   0
   6  -8  12   -0.11    0.73   0
   6  -5   9   17.26    1.05   0
   6  -2   7   47.80    1.27   0
   7  -5  12   13.09    0.80   0
   7  -4  11   60.37    1.18   0
   7  -3  10    0.59    0.86   0
   8  -2  13    5.81    0.62   0
   8  -1  12    3.93    0.77   0
   8   0  11   -0.10    0.72   0
   8   7   8   87.16    1.85   0
   9   5  12   11.63    0.81   0
   9   7  11    0.45    0.79   0
   9  13  10    1.55    1.00   0
 -13  -4   1   17.11    1.23   0
 -13  -1   0    0.66    0.85   0
 -12   7  -2   -0.01    0.89   0
 -12   8  -2    7.71    0.78   0
 -11  -4   0   -0.04    1.21   0
 -10   3  -2   43.13    1.14   0
  -9 -17   7    1.45    1.21   0
  -9 -12   3   62.00    3.81   0
  -9   9  -3   99.34    1.55   0
  -9  17  -3   32.27    1.01   0
  -9  18  -3    1.41    0.96   0
  -8  -6   0    3.31    1.43   0
  -8  -3  -1   32.24    1.50   0
  -8   1  -2   18.34    1.34   0
  -8   8  -3   16.03    1.02   0
  -8  19  -3    1.97    0.77   0
  -8  20  -3   34.60    1.06   0
  -7   7  -3  219.31    2.19   0
  -6   7  -3  177.61    1.95   0
  -6  20  -3   14.81    1.04   0
  -6  26  -2   10.81    0.76   0
  -5 -15   5   95.35    2.13   0
  -5  19  -3    1.39    0.87   0
  -5  26  -2    0.06    0.82   0
  -4   2  -2  336.68    3.09   0
  -4  10  -3  115.09    1.62   0
  -4  11  -3   16.37    0.92   0
  -4  16  -3   53.53    1.21   0
  -4  17  -3   75.43    1.61   0
  -4  25  -2    5.49    0.93   0
  -2 -12   4  110.45    1.81   0
  -2  27  -1    0.64    0.80   0
  -1 -18  11    3.18    0.86   0
  -1 -16   8   16.55    0.96   0
  -1 -15   7   29.98    1.27   0
  -1  18  -2   -0.32    1.00   0
  -1  29   0   -0.44    0.86   0
   0 -18  13    2.26    0.85   0
   0 -15   8   -0.41    1.00   0
   0 -14   7   30.23    1.22   0
   0  27   0    0.75    0.93   0
   1 -17  13    0.67    0.87   0
   1 -16  11    8.52    0.90   0
   1  17  -1    5.44    1.43   0
   2 -10   6  398.62    2.60   0
   2  -2   2  113.41    2.25   0
   2  29   2    5.90    0.88   0
   3 -14  12   32.70    0.86   0
   3   1   2   16.34    1.48   0
   4 -13  14    0.89    0.68   0
   4 -12  12    1.44    0.85   0
   4 -10   9   11.03    0.81   0
   4  -6   6   50.74    1.26   0
   4  -4   5 1452.24    5.02   0
   4  26   3    1.94    1.16   0
   5 -11  14   -0.32    0.71   0
   5 -10  12   32.01    0.97   0
   5  -5   7   -1.10    0.96   0
   5  -1   5    2.40    0.90   0
   5   2   4  281.41    2.70   0
   5  21   3   14.40    2.38   0
   6  -8  13    0.66    0.78   0
   6  -7  11   10.78    0.70   0
   6  -6  10   40.02    1.18   0
   6   9   4   35.66    1.81   0
   7  -5  13   15.44    0.91   0
   7  -1   9   33.03    1.09   0
   7   3   7  347.52    2.92   0
   7  20   6    4.28    1.50   0
   8   2  10    9.12    0.88   0
   8   4   9    3.55    1.00   0
   9   6  12    0.64    0.79   0
 -13   3  -1    0.54    1.03   0
 -12 -10   3    5.39    1.27   0
 -12  -8   2    8.00    1.24   0
 -12  -3   0  107.44    1.93   0
 -11  -9   2   32.04    1.65   0
 -11   4  -2    4.22    1.12   0
 -10  -5   0    1.19    1.04   0
 -10  -2  -1    6.12    1.24   0
 -10  10  -3    1.10    1.03   0
 -10  11  -3   27.12    1.23   0
 -10  12  -3    8.05    0.80   0
 -10  13  -3    1.86    0.73   0
 -10  15  -3    3.21    0.79   0
 -10  16  -3   -1.37    0.92   0
 -10  17  -3   -0.14    0.85   0
  -9  19  -3   25.09    1.05   0
  -8   7  -3  205.31    2.03   0
  -8  21  -3    0.30    0.83   0
  -7 -19   9    9.81    1.07   0
  -7  21  -3    1.99    0.94   0
  -6 -19   9    0.05    0.80   0
  -6  21  -3    0.79    0.91   0
  -5 -18   8    1.02    0.97   0
  -5   1  -2  114.27    1.83   0
  -4   9  -3  182.20    1.98   0
  -4  18  -3   12.24    1.15   0
  -3 -18   9    5.46    0.89   0
  -3 -14   5   15.23    1.34   0
  -3  24  -2    0.52    0.89   0
  -2 -18  10    4.43    0.91   0
  -2  22  -2    0.59    0.84   0
  -1 -11   4  367.08    2.93   0
  -1   2  -1  287.27    4.23   0
  -1   9  -2  227.56    2.54   0
  -1  19  -2    1.39    1.11   0
   0 -17  11    0.12    0.76   0
   0  -8   3    1.55    1.04   0
   1 -10   5  591.44    3.18   0
   1  10  -1  866.69    5.57   0
   1  18  -1   -0.19    1.33   0
   2 -15  12    1.14    0.78   0
   2 -14  10   86.67    1.33   0
   2  26   1   32.43    1.38   0
   3 -14  13    0.49    0.81   0
   3 -13  11   29.78    1.06   0
   3  -8   6   31.56    1.13   0
   3  -2   3  450.95    3.63   0
   4  22   2   48.73    2.25   0
   5  -9  11    4.17    0.87   0
   5  -6   8   51.13    1.29   0
   5  -3   6   14.81    0.92   0
   6  -8  14    5.97    0.80   0
   6  -3   8   15.11    1.16   0
   6   1   6   79.79    1.63   0
   6   4   5  222.17    2.46   0
   7  -4  12   18.59    0.91   0
   7  -2  10    5.95    0.98   0
   7   1   8   20.82    1.19   0
   8  -1  13    3.78    0.70   0
   8   1  11    1.58    0.74   0
   8   5   9   41.12    1.34   0
   8  19   8    0.55    1.00   0
   9   9  11    9.23    0.98   0
 -13  -7   2    2.39    1.08   0
 -12   6  -2   11.05    0.89   0
 -11  -7   1    3.65    1.19   0
 -11  -1  -1    3.50    1.16   0
 -10   9  -3    3.48    1.15   0
 -10  18  -3    5.14    0.74   0
 -10  19  -3    0.50    0.85   0
  -9   1  -2   -1.77    1.26   0
  -9   7  -3   27.35    1.26   0
  -9  20  -3   16.12    0.84   0
  -9  21  -3    0.91    0.87   0
  -8 -15   5   47.73    2.33   0
  -8   6  -3    8.79    1.24   0
  -8  22  -3    1.62    0.84   0
  -7   6  -3   27.48    1.13   0
  -7  22  -3    0.22    0.88   0
  -6  22  -3   14.30    0.94   0
  -5 -17   7   78.45    1.75   0
  -5 -16   6   26.44    1.32   0
  -5 -12   3  482.89    5.47   0
  -5  -3  -1  110.65    2.10   0
  -5   7  -3   84.19    1.38   0
  -5  21  -3   17.97    1.10   0
  -5  27  -2    0.02    0.76   0
  -4 -19  10    1.99    0.81   0
  -4  19  -3   44.10    1.24   0
  -4  26  -2    0.25    0.85   0
  -3 -19  11   19.65    1.02   0
  -3 -11   3    9.46    1.13   0
  -3   3  -2  351.18    3.31   0
  -3  13  -3  802.19    3.62   0
  -3  14  -3  104.95    1.72   0
  -3  15  -3   48.91    1.87   0
  -3  25  -2   24.55    0.99   0
  -2 -19  12    7.78    0.67   0
  -2   0  -1    2.43    0.85   0
  -2   5  -2 2231.00    7.99   0
  -2  23  -2    2.26    0.89   0
  -1  26  -1   26.29    1.07   0
   0  23  -1   -0.69    1.00   0
   1 -15  10    1.55    0.87   0
   1  -4   2   11.90    1.23   0
   1  25   0   -0.14    0.90   0
   1  29   1   23.50    1.20   0
   2 -13   9    0.54    0.80   0
   2 -12   8  101.36    1.61   0
   2 -11   7   15.45    0.90   0
   2  21   0   32.33    1.53   0
   3 -14  14    3.81    0.84   0
   3  22   1    8.22    1.28   0
   4 -12  13   14.95    0.80   0
   4 -11  11    4.33    0.82   0
   4  -7   7  155.71    1.76   0
   4   6   2   24.24    1.80   0
   5 -10  13    0.89    0.70   0
   5  -8  10    9.75    0.81   0
   5  -7   9   18.97    1.55   0
   5   7   3   86.49    2.16   0
   6  -7  12   24.05    0.79   0
   6  -4   9   69.53    1.31   0
   6  -1   7  204.74    2.09   0
   6  10   4   33.76    1.93   0
   7  -3  11   52.68    1.12   0
   7   4   7  111.47    1.90   0
 -13  -2   0   -0.39    1.08   0
 -13   2  -1   19.96    1.15   0
 -13   8  -2   -1.21    0.92   0
 -13   9  -2    6.26    0.79   0
 -12   0  -1    0.53    0.98   0
 -12   5  -2   16.00    1.12   0
 -11 -11   3   13.33    1.58   0
 -11   3  -2   63.67    1.56   0
 -11  11  -3   16.83    1.02   0
 -11  12  -3    0.57    1.01   0
 -11  13  -3   38.79    1.20   0
 -11  14  -3   29.64    0.92   0
 -11  15  -3   22.23    1.15   0
 -11  16  -3    1.24    1.00   0
 -11  17  -3   18.27    1.01   0
 -10   8  -3  177.60    1.92   0
  -9  -6   0   -0.61    1.29   0
  -9  -3  -1  142.17    2.16   0
  -9   6  -3   64.14    1.45   0
  -8 -18   8   23.25    1.26   0
  -8   0  -2  280.94    2.70   0
  -8  23  -3   16.60    0.99   0
  -7 -18   8   -0.37    1.02   0
  -7   0  -2  109.15    1.83   0
  -7   5  -3    0.33    1.19   0
  -7  23  -3    1.64    0.89   0
  -6 -18   8   23.65    1.12   0
  -6 -15   5    4.83    1.24   0
  -6   0  -2 1379.72    5.92   0
  -6  23  -3   11.31    0.91   0
  -5  -6   0    0.03    1.37   0
  -5   6  -3  151.69    1.96   0
  -5  22  -3    7.32    0.97   0
  -4   8  -3  227.66    2.12   0
  -4  20  -3    1.29    0.87   0
  -3 -17   8    1.45    0.80   0
  -3 -16   7   64.93    1.54   0
  -3 -15   6   13.49    1.20   0
  -3  11  -3   12.25    1.05   0
  -3  12  -3  235.95    2.08   0
  -3  16  -3   32.11    1.06   0
  -3  17  -3  137.68    1.77   0
  -2 -17   9   55.95    1.37   0
  -2  28  -1    1.85    0.91   0
  -1 -18  12    1.61    0.76   0
  -1 -17  10   19.03    0.93   0
  -1   8  -2   67.93    1.75   0
  -1  20  -2   -0.06    1.07   0
   0 -17  12   -0.13    0.82   0
   0 -16  10  244.79    2.07   0
   0 -11   5    0.11    0.86   0
   0  28   0   15.58    1.03   0
   1 -16  12    3.58    0.61   0
   1 -11   6  127.75    1.64   0
   1   9  -1  321.28    3.79   0
   1  19  -1  511.99    3.64   0
   2 -15  13   22.69    0.90   0
   2 -14  11    0.71    0.83   0
   2  -8   5  497.80    2.90   0
   3 -13  12    7.51    0.90   0
   3 -12  10   10.37    0.66   0
   3 -11   9    1.44    0.95   0
   3 -10   8  148.54    1.71   0
   3  -9   7  225.25    2.03   0
   3  -6   5  222.78    2.09   0
   3  -4   4   76.84    1.48   0
   3   6   1  384.35    7.22   0
   4 -12  14    1.61    0.73   0
   4 -10  10    1.59    0.73   0
   4  -9   9   11.30    1.03   0
   4  -8   8   -1.30    1.03   0
   5 -10  14    5.88    0.75   0
   5  -9  12    1.75    0.83   0
   5  -4   7   99.38    1.60   0
   6  -7  13   60.67    1.13   0
   6  -6  11   -0.51    0.62   0
   6  -5  10    5.27    0.75   0
   7  -4  13    3.82    0.65   0
   7   0   9    0.92    0.88   0
   7   2   8    6.08    1.07   0
   8   0  13   -0.32    0.53   0
   8   1  12    3.18    0.79   0
   8   2  11    2.57    0.79   0
   8   4  10    5.13    0.91   0
   8  18   8   21.48    1.42   0
 -13  -5   1    0.39    1.08   0
 -13   7  -2    1.27    0.95   0
 -12   4  -2   22.04    1.10   0
 -11  10  -3   -0.62    1.01   0
 -10   1  -2    7.40    1.06   0
 -10   7  -3  101.19    1.60   0
  -8 -17   7    0.21    1.08   0
  -8   5  -3  109.96    1.77   0
  -7 -15   5  139.77    2.82   0
  -7  24  -3    7.91    0.91   0
  -6 -17   7   75.83    1.73   0
  -6   5  -3   30.34    1.20   0
  -5 -19  10    2.18    0.89   0
  -5  23  -3    0.33    0.83   0
  -4 -18   9    0.40    0.93   0
  -4 -13   4    0.20    1.23   0
  -4   7  -3  267.93    2.41   0
  -4  21  -3   17.95    1.12   0
  -4  27  -2    0.52    0.83   0
  -3  -7   1  576.78    9.06   0
  -3  10  -3   34.41    1.21   0
  -3  18  -3   69.81    1.55   0
  -3  26  -2    7.30    0.86   0
  -2 -13   5   41.59    1.38   0
  -2 -10   3  228.81    2.85   0
  -2  24  -2    0.48    0.99   0
  -1  -9   3    1.53    0.94   0
  -1  21  -2    9.95    1.02   0
   0  24  -1   22.69    1.18   0
   1 -16  13    1.12    0.82   0
   1 -14   9    9.78    0.73   0
   1 -13   8   18.33    1.20   0
   1 -12   7   57.29    1.37   0
   1  -8   4    6.07    0.67   0
   1  26   0    1.00    1.00   0
   2 -15  14    1.69    0.69   0
   2  -4   3  554.20    4.01   0
   2  22   0   68.96    1.96   0
   3  27   2   23.40    1.32   0
   4 -11  12   15.13    0.84   0
   4  -5   6  294.79    2.18   0
   4  -1   4  104.40    1.71   0
   4   2   3   46.23    1.52   0
   5  -2   6  235.83    2.12   0
   5   0   5   -0.28    0.67   0
   5   3   4   37.25    1.36   0
   6  -7  14    0.92    0.83   0
   6  -2   8   65.64    1.46   0
   6   2   6   84.80    1.70   0
   6  11   4   20.90    1.74   0
   6  17   4   25.66    2.33   0
   7  -3  12    0.86    0.70   0
   7  -2  11   24.28    0.98   0
   7  -1  10    3.82    0.86   0
   7   5   7   14.89    1.20   0
   7   9   6   13.76    1.31   0
   8  11   8    3.02    1.04   0
   8  17   8   14.42    1.37   0
 -13   1  -1    9.98    0.96   0
 -13   6  -2   27.35    1.14   0
 -12  13  -3   -0.05    0.85   0
 -11  -2  -1   45.26    1.42   0
 -11   2  -2   44.21    1.42   0
 -11   9  -3    0.06    0.70   0
 -10 -10   2   14.27    1.72   0
 -10  -8   1    4.83    1.23   0
 -10   6  -3    0.09    0.90   0
  -9   0  -2  222.27    2.60   0
  -9   5  -3   27.18    1.31   0
  -8 -16   6   73.61    2.20   0
  -7 -17   7   28.98    1.39   0
  -7   4  -3   83.20    1.66   0
  -6 -16   6  102.34    2.06   0
  -6  24  -3   -0.96    0.63   0
  -4 -19  11    3.80    0.85   0
  -4   1  -2  194.18    2.43   0
  -4  22  -3    0.02    0.99   0
  -3 -19  12    5.95    0.76   0
  -3 -18  10    7.46    0.89   0
  -3   9  -3  201.54    2.15   0
  -3  19  -3  282.51    2.18   0
  -2 -18  11    3.30    0.63   0
  -2 -16   8    0.49    0.82   0
  -2  -6   1  378.45    6.25   0
  -2  29  -1   33.77    1.16   0
  -1 -16   9    4.61    0.72   0
  -1 -12   5   31.61    1.13   0
  -1  -7   2  917.45    6.23   0
  -1  27  -1    3.31    0.88   0
   0 -17  13   -1.08    0.64   0
   0 -15   9    1.23    0.62   0
   0 -12   6  146.59    1.85   0
   1 -15  11   30.66    0.99   0
   1  -6   3  827.56    4.65   0
   1  -1   1    1.11    0.28   0
   1  20  -1  136.51    2.02   0
   2 -14  12    2.25    0.85   0
   2 -13  10   60.24    1.22   0
   2  -6   4  122.56    1.78   0
   2  27   1   -0.47    0.98   0
   3 -13  13    9.34    0.64   0
   3 -12  11   12.87    0.96   0
   3  23   1   -1.50    1.24   0
   4 -11  13    1.82    0.76   0
   4 -10  11    3.13    0.85   0
   4  -3   5 1305.71    4.64   0
   5  -9  13   -0.01    0.66   0
   5  -8  11    6.33    0.71   0
   5  -7  10    0.42    0.81   0
   5  -5   8    2.67    1.06   0
   6  -6  12    5.05    0.64   0
   6  -5  11   13.09    1.00   0
   6  -3   9    8.70    1.00   0
   6  12   4    6.84    1.72   0
   7   1   9   33.55    1.08   0
   7  19   6   -0.22    1.30   0
   8   1  13    3.31    0.58   0
   8   2  12    0.66    0.66   0
   8   3  11    0.83    0.59   0
   8   5  10   14.72    1.08   0
   8  12   8   42.81    1.46   0
   8  13   8   17.95    1.36   0
   8  14   8   19.02    1.45   0
   8  15   8   33.47    1.61   0
   8  16   8    7.19    1.20   0
 -12  -4   0   -0.35    0.96   0
 -12  -1  -1   87.04    1.59   0
 -12   3  -2    9.41    0.95   0
 -12  11  -3    2.35    1.00   0
 -12  12  -3    9.88    1.07   0
 -11  -5   0    0.16    1.03   0
 -11   7  -3    3.54    0.92   0
 -10  -3  -1   23.82    1.25   0
  -8  -4  -1   50.27    1.78   0
  -8   4  -3   30.81    1.38   0
  -7 -16   6    0.38    1.12   0
  -7  -4  -1   98.51    1.92   0
  -7  25  -3    0.94    0.68   0
  -6 -19  10   13.17    0.98   0
  -6   4  -3  342.24    2.55   0
  -6  25  -3   17.13    1.01   0
  -5   0  -2    9.29    1.10   0
  -5   5  -3   91.84    1.46   0
  -5  24  -3    0.43    0.88   0
  -4 -17   8   61.57    1.55   0
  -4  23  -3    4.03    0.84   0
  -4  28  -2    3.41    0.85   0
  -3  -9   2    9.49    1.37   0
  -3  20  -3   19.42    0.87   0
  -3  27  -2   26.05    1.02   0
  -2 -15   7   38.77    1.21   0
  -2 -14   6   33.63    1.20   0
  -2   4  -2  150.19    2.49   0
  -2  25  -2   10.70    0.97   0
  -1 -17  11   38.62    0.97   0
  -1 -15   8   87.89    1.47   0
  -1 -14   7    8.96    1.05   0
  -1 -13   6   31.07    1.27   0
  -1   7  -2 1160.96    6.02   0
  -1  22  -2    1.01    0.91   0
   0 -16  11   12.24    0.83   0
   0 -14   8   72.54    1.24   0
   0 -13   7    0.32    1.05   0
   0  14  -2    0.37    1.12   0
   0  15  -2   -0.66    0.96   0
   0  25  -1   -0.61    0.94   0
   0  29   0   -1.06    0.87   0
   1  21  -1   94.53    1.91   0
   2 -12   9   32.47    1.15   0
   2  -9   6   11.38    0.78   0
   3 -13  14    3.84    0.68   0
   3  -7   6   90.91    1.41   0
   4 -11  14   13.30    0.89   0
   4  -6   7  143.18    1.70   0
   4  23   2    8.10    1.46   0
   4  27   3   -0.17    1.12   0
   5  -8  12   14.83    0.89   0
   5  -6   9    0.19    0.71   0
   5   8   3   95.12    2.29   0
   6  -6  13   17.64    0.82   0
   6  -4  10   19.35    0.85   0
   7  -3  14    2.46    0.69   0
   7  -2  12    1.10    0.76   0
   7   0  10    2.20    0.89   0
   7   3   8   84.82    1.57   0
   7  10   6   14.80    1.39   0
   8   2  13    4.75    0.76   0
   8   8   9    1.11    0.92   0
 -13  -3   0   -0.77    0.84   0
 -13   5  -2    7.71    1.10   0
 -12   9  -3    6.40    0.89   0
 -12  10  -3    6.41    0.79   0
 -11   1  -2   99.87    1.91   0
 -10  -6   0   54.52    1.64   0
 -10   0  -2   88.47    1.83   0
 -10   5  -3   10.69    0.99   0
  -9   4  -3  264.85    2.31   0
  -8  12  -4   16.82    1.01   0
  -8  13  -4    2.04    0.95   0
  -8  14  -4    5.40    1.05   0
  -8  15  -4   11.49    1.14   0
  -8  16  -4    6.61    1.44   0
  -8  17  -4   11.35    0.98   0
  -7  -1  -2    2.95    0.98   0
  -7  12  -4   28.30    1.26   0
  -7  13  -4   53.28    1.35   0
  -7  14  -4   22.38    0.90   0
  -7  15  -4  173.92    1.65   0
  -6  14  -4   17.83    1.17   0
  -6  16  -4   50.55    1.24   0
  -5 -18   9   48.68    1.33   0
  -5  25  -3    1.56    0.76   0
  -4 -14   5   10.04    1.35   0
  -4   6  -3   26.64    1.02   0
  -3   2  -2   24.89    1.48   0
  -3   8  -3   82.96    1.55   0
  -3  21  -3   34.10    0.95   0
  -2 -18  12    1.16    0.74   0
  -2 -17  10  102.69    1.44   0
  -2  -8   2   42.86    1.79   0
  -2  13  -3    6.05    1.00   0
  -2  14  -3   43.94    1.35   0
  -2  15  -3   55.53    1.62   0
  -2  16  -3    1.94    1.21   0
  -2  17  -3    3.88    1.06   0
  -1  23  -2   53.65    1.32   0
  -1  28  -1    4.08    0.82   0
   0  -9   4    0.14    0.88   0
   0  -3   1    0.77    0.44   0
   0  13  -2   -0.66    1.04   0
   0  16  -2  119.94    1.94   0
   0  17  -2    0.54    1.19   0
   1 -15  12    1.45    0.77   0
   1 -14  10   62.97    1.25   0
   1  -9   5  136.48    1.77   0
   1  27   0   -0.65    0.95   0
   2 -14  13   10.51    0.78   0
   2 -11   8   -0.16    0.98   0
   2 -10   7   18.51    1.11   0
   2  23   0   30.22    1.43   0
   3 -12  12   14.74    0.91   0
   3 -11  10   99.19    1.23   0
   3  -8   7    1.05    1.03   0
   3  -1   3    6.84    1.26   0
   4 -10  12    9.88    0.87   0
   4  -9  10   71.05    1.10   0
   4  -8   9  140.25    1.61   0
   4  -7   8    3.31    1.01   0
   5  -3   7    6.74    1.07   0
   6  -6  14   -0.28    0.69   0
   6  -5  12   35.66    0.98   0
   6  -1   8   77.15    1.55   0
   6   3   6   59.64    1.57   0
   6  13   4    1.41    1.82   0
   6  16   4   50.95    2.62   0
   7  -1  11   -0.38    0.62   0
   7   6   7    2.21    1.05   0
   7  11   6  112.90    2.24   0
   7  18   6   35.52    1.98   0
   8   3  12    3.41    0.65   0
   8   6  10   37.14    1.13   0
   8   9   9   -0.94    0.90   0
 -13   0  -1    0.59    0.96   0
 -13   4  -2    8.06    1.01   0
 -12 -12   4   -0.16    1.39   0
 -11   6  -3   19.09    1.19   0
  -9  -4  -1   78.51    1.96   0
  -9  12  -4   35.57    1.30   0
  -9  13  -4   11.89    1.12   0
  -9  14  -4    7.37    0.84   0
  -9  15  -4   16.79    0.87   0
  -9  16  -4   97.37    1.36   0
  -9  17  -4    0.67    0.98   0
  -9  18  -4   64.89    1.24   0
  -8  -1  -2   18.59    1.36   0
  -8   3  -3   96.43    1.72   0
  -8  11  -4    5.56    1.05   0
  -8  18  -4   20.19    0.92   0
  -8  19  -4   13.58    1.09   0
  -7   3  -3 1133.54    4.41   0
  -7  11  -4    6.88    1.23   0
  -7  18  -4   -1.58    0.80   0
  -7  19  -4   14.88    1.04   0
  -6  -4  -1  560.81    4.24   0
  -6  12  -4    8.42    1.18   0
  -6  13  -4    3.21    0.83   0
  -6  17  -4   24.04    0.86   0
  -6  26  -3    3.62    0.66   0
  -5 -19  11    3.29    0.73   0
  -4 -16   7   30.48    1.17   0
  -4 -15   6    5.35    1.20   0
  -4  24  -3   30.21    0.94   0
  -3 -17   9   18.66    0.92   0
  -3  22  -3    3.47    0.99   0
  -3  28  -2   -0.51    0.80   0
  -2  12  -3  120.50    1.70   0
  -2  18  -3   65.71    1.62   0
  -2  26  -2    2.08    0.95   0
  -1 -17  12   16.71    0.85   0
  -1 -16  10    5.05    0.93   0
   0 -16  12    6.22    0.77   0
   0 -15  10    1.65    0.92   0
   0   4  -1 3938.80   15.25   0
   0  12  -2 1136.91    5.26   0
   0  18  -2  373.20    2.88   0
   0  26  -1   29.32    1.24   0
   1 -15  13   -0.29    0.79   0
   1   8  -1 1314.89    7.87   0
   1  22  -1   10.17    1.20   0
   2 -14  14    0.72    0.65   0
   2 -13  11   72.71    1.16   0
   3 -12  13    7.33    0.87   0
   3 -10   9   66.83    1.15   0
   3  -9   8   -0.85    0.89   0
   3  -5   5    0.24    0.94   0
   5  -8  13   63.43    1.18   0
   5  -7  11    0.61    0.77   0
   5   1   5    3.58    0.93   0
   5  26   4   28.27    2.29   0
   6  -4  11   -0.25    0.89   0
   6  -2   9   23.03    1.08   0
   6   1   7  204.85    2.09   0
   6  14   4   12.52    1.79   0
   6  15   4   29.17    2.36   0
   7  -2  13   -1.06    0.49   0
   7  -2  14    1.57    0.67   0
   7  -1  12    1.56    0.79   0
   7   2   9    9.16    0.99   0
   7   4   8    8.48    1.06   0
   7  12   6   27.54    1.60   0
   8   3  13    0.94    0.70   0
   8   4  12   21.83    0.92   0
   8   5  11   10.93    0.86   0
   8   7  10    2.63    0.86   0
 -13  -8   2   -0.31    1.17   0
 -12  -7   1    0.89    1.06   0
 -12   2  -2   -1.23    0.99   0
 -12   7  -3   11.79    0.98   0
 -11  -3  -1   51.37    1.65   0
 -11   5  -3    3.17    0.97   0
 -10   4  -3   11.27    1.08   0
 -10  13  -4    0.32    1.01   0
 -10  14  -4   25.60    1.31   0
 -10  15  -4   31.70    1.18   0
 -10  17  -4    6.65    0.98   0
  -9  -1  -2    0.61    1.21   0
  -9   3  -3  233.57    2.24   0
  -9  10  -4   38.36    1.20   0
  -9  11  -4   60.24    1.18   0
  -9  19  -4    0.51    0.66   0
  -9  20  -4    0.69    0.82   0
  -8  10  -4    1.88    0.78   0
  -8  20  -4    0.82    0.71   0
  -8  21  -4    1.90    0.85   0
  -7  10  -4  193.60    1.98   0
  -7  20  -4    3.04    0.68   0
  -7  21  -4    0.25    0.80   0
  -6 -18   9    0.16    0.94   0
  -6  -1  -2  299.75    2.75   0
  -6   3  -3  439.64    2.85   0
  -6  10  -4   36.11    1.33   0
  -6  11  -4   22.00    1.01   0
  -6  19  -4    9.21    0.86   0
  -6  20  -4   18.63    1.01   0
  -5   4  -3 1060.85    4.56   0
  -5  13  -4   55.10    1.43   0
  -5  15  -4    1.60    0.95   0
  -5  17  -4  111.66    1.55   0
  -5  18  -4   12.78    0.96   0
  -5  26  -3   48.02    1.04   0
  -4 -18  10    9.83    0.83   0
  -4   5  -3   81.13    1.54   0
  -4  25  -3   16.97    1.02   0
  -3 -12   4  122.64    2.58   0
  -3   7  -3   78.95    1.53   0
  -3  23  -3    2.79    0.97   0
  -2  11  -3    8.03    1.06   0
  -2  19  -3   66.85    1.47   0
  -1 -17  13    0.95    0.85   0
  -1  24  -2    0.50    0.97   0
   0 -16  13    3.76    0.87   0
   0  11  -2   -0.05    1.05   0
   0  19  -2    0.64    1.22   0
   1 -15  14   22.07    0.99   0
   1 -14  11   15.79    0.94   0
   1 -13   9  235.05    1.87   0
   2  -7   5  175.26    1.91   0
   2  -1   2  825.21    5.62   0
   2  28   1    0.88    0.91   0
   3 -12  14   14.37    0.89   0
   3 -11  11   51.74    1.17   0
   3  -3   4  333.12    2.73   0
   3  24   1   25.47    1.39   0
   3  28   2   -0.34    1.05   0
   4 -10  14   11.59    0.89   0
   4  -9  11    0.74    0.84   0
   4  -4   6    0.33    0.61   0
   4   0   4  139.05    1.93   0
   5  -8  14    4.12    0.61   0
   5  -5   9   13.77    1.01   0
   5  -4   8   22.13    0.91   0
   6  -5  13    0.44    0.53   0
   6  -5  14   30.66    0.96   0
   6  -3  10    0.98    0.71   0
   7   0  11    0.20    0.79   0
   7  13   6    2.03    1.19   0
   7  17   6    2.25    1.37   0
 -13  -6   1   27.03    1.36   0
 -13   3  -2    7.23    0.96   0
 -12  -9   2   13.36    1.24   0
 -12  -2  -1    0.17    1.01   0
 -11   0  -2   51.89    1.71   0
 -10  12  -4   -0.99    0.73   0
  -9   9  -4  150.46    1.68   0
  -8  -9   1    1.83    1.65   0
  -8   9  -4   10.75    0.92   0
  -8  22  -4    6.13    0.91   0
  -7 -18   9    1.16    0.93   0
  -7  -9   1    0.39    1.83   0
  -7   9  -4  376.58    2.55   0
  -7  22  -4   12.88    0.89   0
  -6 -12   3   71.39    2.90   0
  -6   9  -4   38.39    1.30   0
  -6  21  -4    5.01    0.94   0
  -5 -17   8   18.68    1.06   0
  -5  11  -4    5.57    1.24   0
  -5  12  -4  121.08    1.58   0
  -5  19  -4   14.55    1.03   0
  -5  27  -3   10.29    0.86   0
  -4  -3  -1  102.51    2.36   0
  -3 -18  12    1.03    0.85   0
  -3 -16   8   35.45    1.11   0
  -3  24  -3   66.89    1.30   0
  -2 -17  11    7.88    0.91   0
  -2 -16   9    0.27    0.77   0
  -2  20  -3    1.89    1.02   0
  -2  27  -2   46.68    1.25   0
  -1 -15   9   78.65    1.33   0
  -1 -10   4   18.31    1.13   0
  -1   6  -2  150.35    2.54   0
  -1  29  -1   22.48    1.09   0
   0 -14   9  126.07    1.56   0
   0  20  -2    1.89    1.03   0
   1 -12   8   14.79    0.86   0
   1 -11   7   34.42    1.24   0
   1  23  -1    3.61    1.11   0
   1  28   0   -0.96    0.97   0
   2 -12  10   10.82    0.70   0
   2  24   0    0.52    0.95   0
   4  -8  10    0.17    0.85   0
   4  -2   5  814.80    3.95   0
   4   7   2 1526.31    9.40   0
   5  -7  12    4.91    0.65   0
   5   9   3  146.00    2.99   0
   5  22   3    7.27    2.26   0
   6   0   8  105.44    1.70   0
   7  -1  13   -0.26    0.64   0
   7   3   9   14.41    0.97   0
   7   5   8    1.72    0.97   0
   7  14   6   45.59    1.85   0
   7  15   6   26.32    1.66   0
   7  16   6    0.03    1.24   0
   8   6  11    0.89    0.67   0
   8   8  10   -0.57    0.82   0
 -13   9  -3    1.27    0.70   0
 -12  -5   0    3.75    0.89   0
 -12   1  -2    2.19    1.04   0
 -12   6  -3    0.25    1.00   0
 -11  -8   1    6.97    1.15   0
 -11   4  -3    6.03    0.97   0
 -11  12  -4   10.02    0.95   0
 -11  13  -4   -0.15    0.94   0
 -11  14  -4   25.03    1.27   0
 -11  15  -4    1.64    0.74   0
 -11  16  -4    0.54    0.81   0
 -10  -4  -1  265.98    2.58   0
 -10  -1  -2    6.41    1.10   0
 -10   3  -3   82.19    1.52   0
 -10  10  -4   10.81    1.06   0
  -9   8  -4   21.96    1.09   0
  -8  -7   0  240.81    3.23   0
  -8   2  -3   35.56    1.42   0
  -8   8  -4   32.51    1.32   0
  -8  23  -4    2.40    0.90   0
  -7  -7   0    7.85    1.38   0
  -7   2  -3   84.44    1.60   0
  -7   8  -4    9.53    1.21   0
  -7  23  -4   20.33    1.08   0
  -6  22  -4    3.87    0.97   0
  -5 -18  10    3.86    0.93   0
  -5 -13   4   48.39    1.78   0
  -5  10  -4  126.79    1.80   0
  -5  20  -4   -1.21    0.73   0
  -5  21  -4    4.54    0.93   0
  -4 -18  11    3.45    0.92   0
  -4  14  -4   77.04    1.59   0
  -4  15  -4    0.06    1.17   0
  -4  16  -4  130.51    1.85   0
  -4  17  -4   -0.20    0.99   0
  -4  26  -3    1.76    0.66   0
  -3 -17  10    0.16    0.89   0
  -3 -15   7    5.83    1.14   0
  -3  -2  -1  288.60    4.16   0
  -2 -11   4  183.22    2.26   0
  -2  21  -3    6.15    0.99   0
  -1 -16  11    6.87    0.79   0
  -1  25  -2    1.95    0.94   0
   0 -15  11    0.05    0.65   0
   0 -13   8    0.69    1.02   0
   0 -10   5   95.94    1.56   0
   0  -7   3    0.54    1.02   0
   0  10  -2  209.04    2.52   0
   0  21  -2    0.09    0.89   0
   0  27  -1    1.25    0.88   0
   1 -14  12    8.04    0.85   0
   1  -7   4   41.33    1.27   0
   2 -13  13   22.63    0.77   0
   2 -13  14    0.24    0.81   0
   2 -11   9    4.52    1.03   0
   2  -8   6    4.15    0.91   0
   3 -11  12   23.66    0.79   0
   3 -10  10   10.16    0.71   0
   3  -6   6  643.05    3.17   0
   4  -9  12   15.92    0.86   0
   4  -7   9   -0.92    1.06   0
   4  -6   8    5.78    1.09   0
   4  -5   7   62.06    1.16   0
   5  -7  13   -0.68    0.68   0
   5  -7  14   -0.03    0.77   0
   5  -6  11   61.28    1.18   0
   5  -2   7   83.72    1.56   0
   6  -4  13    5.93    0.79   0
   6  -3  11   18.28    0.95   0
   6  -1   9   41.83    1.21   0
   6   2   7   51.05    1.49   0
   7  -1  14    6.85    0.57   0
   7   0  12   17.55    0.85   0
   7   1  11   -0.42    0.80   0
   7   2  10    6.36    0.94   0
   8   5  13    1.79    0.67   0
   8   7  11    0.55    0.76   0
   8   9  10   14.65    1.01   0
   8  13   9   23.39    1.28   0
   8  14   9    1.87    1.11   0
   8  17   9    2.21    1.18   0
   8  18   9    0.58    1.03   0
 -13  -4   0    0.10    0.94   0
 -13   2  -2    0.36    0.88   0
 -12   5  -3    0.59    0.91   0
 -11  -6   0    0.81    1.12   0
 -11  11  -4   88.75    1.45   0
 -10   9  -4   22.11    1.01   0
  -9  -7   0  187.39    2.90   0
  -9   2  -3    8.22    1.25   0
  -8  -2  -2   11.50    1.45   0
  -7  24  -4    4.15    0.88   0
  -6 -17   8    3.55    1.07   0
  -6   8  -4   11.08    1.22   0
  -6  23  -4   12.16    1.00   0
  -5 -16   7   17.14    1.20   0
  -5  -1  -2  112.17    1.89   0
  -5   3  -3  586.82    3.44   0
  -5  22  -4  123.49    1.56   0
  -4 -17   9   10.28    0.84   0
  -4   0  -2 3063.91    8.82   0
  -4  12  -4    3.96    1.11   0
  -4  13  -4    2.62    1.15   0
  -4  18  -4    4.56    1.03   0
  -4  19  -4   -0.36    0.87   0
  -4  27  -3   -0.62    0.79   0
  -3 -14   6    1.34    1.05   0
  -3 -13   5   69.86    1.62   0
  -3   6  -3 1285.91    5.10   0
  -3  25  -3    4.21    0.96   0
  -2 -17  12    0.22    0.68   0
  -2 -15   8   47.31    1.20   0
  -2   3  -2  425.84    3.79   0
  -2   9  -3  357.21    2.74   0
  -2  22  -3    1.63    0.97   0
  -2  28  -2    3.39    0.93   0
  -1 -14   8    1.89    0.94   0
   0 -15  12   -0.80    0.82   0
   0 -12   7  312.65    2.32   0
   0 -11   6   -0.28    0.91   0
   0  -5   2    2.03    1.28   0
   1 -14  13   -0.85    0.79   0
   1 -13  10   15.51    0.87   0
   1  24  -1    9.62    1.19   0
   2 -12  11   43.04    1.13   0
   2 -10   8   11.75    1.01   0
   2  -9   7   57.11    1.44   0
   2  -3   3 1040.93    5.32   0
   2  29   1   31.25    1.29   0
   3 -11  13   34.61    0.95   0
   3  -9   9    0.27    0.92   0
   3  -8   8   54.86    1.29   0
   3  -7   7  143.39    1.61   0
   3  25   1    0.15    1.15   0
   4  -9  13   33.45    0.97   0
   4  -9  14   -0.25    0.74   0
   4  24   2    3.48    1.27   0
   5  -5  10   42.01    1.08   0
   5  -3   8    4.14    1.05   0
   5   2   5   27.92    1.14   0
   6  -4  14    7.67    0.72   0
   6  -2  10    0.32    0.58   0
   6  23   5    3.98    2.34   0
   7   0  13   -0.29    0.59   0
   7   4   9    6.59    0.90   0
   8  10  10   16.26    1.08   0
   8  15   9   18.19    1.32   0
   8  16   9   -0.54    0.98   0
 -13   7  -3    2.95    1.01   0
 -12  13  -4    2.08    0.83   0
 -11   3  -3    0.81    0.96   0
 -11  10  -4   10.38    0.85   0
 -10   8  -4   15.91    1.24   0
  -9  -9   1   43.68    1.92   0
  -9  -2  -2  123.95    2.29   0
  -7  -2  -2   31.67    1.32   0
  -6   2  -3   19.70    1.15   0
  -6  24  -4    1.32    0.95   0
  -5 -15   6    2.82    1.12   0
  -5 -14   5    0.34    1.39   0
  -5  -4  -1   19.20    1.40   0
  -5   9  -4   15.13    0.88   0
  -5  23  -4    1.86    0.87   0
  -4 -11   3   14.72    1.44   0
  -4   4  -3   11.08    1.06   0
  -4  11  -4    4.54    1.12   0
  -4  20  -4    1.24    0.93   0
  -2 -16  10  103.30    1.51   0
  -2 -14   7   61.11    1.52   0
  -2 -12   5  166.29    2.03   0
  -2  23  -3    0.04    0.95   0
  -1 -16  12    2.36    0.60   0
  -1 -13   7   11.58    1.06   0
  -1  26  -2   21.32    1.12   0
   0 -15  13    0.34    0.75   0
   0 -14  10   60.79    1.25   0
   0  22  -2   12.05    1.06   0
   0  28  -1   17.40    1.36   0
   1 -14  14    1.12    0.74   0
   1  -5   3    5.86    1.12   0
   1  -3   2   46.52    1.60   0
   1  29   0    0.14    0.94   0
   2 -12  12    4.27    0.82   0
   2  25   0   59.84    1.51   0
   3 -10  11   15.54    1.16   0
   4  -8  11    0.96    0.61   0
   4  -3   6  380.06    2.52   0
   5  -6  12   25.40    0.81   0
   5  -4   9    4.41    0.78   0
   6  -3  12   16.28    0.84   0
   6   1   8   74.91    1.61   0
   6   8   5   52.68    1.76   0
   7   1  12    1.92    0.69   0
   7   6   8   12.19    1.00   0
   7  22   7    0.68    1.13   0
   8   6  13   -0.08    0.58   0
   8   7  12    8.31    0.79   0
   8   8  11    0.59    0.67   0
   8  11  10    8.51    1.03   0
 -13  -2  -1   19.85    1.24   0
 -13   6  -3   26.99    1.21   0
 -12  -3  -1    7.27    1.09   0
 -12   0  -2   22.01    1.18   0
 -12   4  -3   33.29    1.22   0
 -12  11  -4    1.96    0.88   0
 -12  12  -4   -0.31    0.76   0
 -11 -10   2    1.10    1.16   0
 -11  -4  -1   29.02    1.50   0
 -11  -1  -2  102.37    1.80   0
 -11   9  -4   38.17    1.07   0
 -10   2  -3   71.06    1.51   0
  -9 -17   8   12.67    1.10   0
  -9   6  -4    1.32    0.99   0
  -8  -5  -1   90.71    2.10   0
  -8   1  -3  169.00    2.13   0
  -8   6  -4   53.53    1.52   0
  -7 -17   8    1.50    0.92   0
  -6 -18  10    2.79    0.83   0
  -6  25  -4    1.81    0.82   0
  -5 -18  11   -0.52    0.90   0
  -5   8  -4   65.73    1.41   0
  -5  24  -4   16.09    0.92   0
  -4 -18  12    0.24    0.82   0
  -4 -16   8   32.74    1.26   0
  -4  10  -4  116.09    1.65   0
  -4  21  -4    0.93    0.97   0
  -3 -17  11   20.06    0.99   0
  -3   1  -2   14.53    1.31   0
  -3  26  -3    5.62    0.71   0
  -2 -13   6  219.16    2.24   0
  -2   8  -3    0.48    0.95   0
  -2  29  -2    6.79    0.81   0
  -1 -16  13    0.69    0.71   0
  -1 -15  10    1.94    0.70   0
  -1 -12   6  234.42    2.26   0
  -1  14  -3    9.58    1.09   0
  -1  15  -3  325.27    2.69   0
  -1  16  -3   16.98    1.27   0
  -1  17  -3  348.22    2.68   0
  -1  18  -3   29.45    1.32   0
   0 -15  14   -0.50    0.71   0
   0   9  -2    0.05    1.09   0
   0  23  -2    0.99    0.89   0
   1 -13  11   17.46    1.01   0
   1 -12   9   34.78    0.96   0
   1  -8   5    0.64    0.94   0
   1   7  -1 1186.77    7.94   0
   2 -11  10  143.41    1.52   0
   3 -10  12   39.37    1.06   0
   3   0   3    0.11    1.12   0
   3  16   0    0.66    1.60   0
   4  -8  12   -0.08    0.83   0
   4  -7  10  128.97    1.51   0
   4   1   4   98.73    1.72   0
   5  -6  13    0.84    0.57   0
   5  -6  14   20.28    0.87   0
   5  -5  11   26.38    1.05   0
   6  -3  13   90.36    1.30   0
   6  -3  14   -0.34    0.73   0
   6  -2  11    1.32    0.72   0
   6  -1  10    6.08    0.87   0
   6   0   9   -0.02    0.97   0
   6   3   7    0.67    1.05   0
   6   5   6   41.51    1.45   0
   7   1  13    1.01    0.66   0
   7   2  11   19.79    0.76   0
   8   9  11   -0.72    0.71   0
 -13   1  -2    0.09    0.97   0
 -12  10  -4   16.31    1.13   0
 -11   8  -4    0.76    0.76   0
 -10 -16   7    0.30    1.07   0
 -10  -2  -2  230.06    2.35   0
  -9  -5  -1   44.80    1.84   0
  -9   1  -3   37.29    1.43   0
  -8 -17   8   14.21    1.14   0
  -7 -18  10    0.45    0.90   0
  -7  -5  -1    8.71    1.15   0
  -7   1  -3  196.06    2.10   0
  -6 -16   7    4.60    1.09   0
  -6  -2  -2  422.47    3.28   0
  -5 -17   9   37.10    1.18   0
  -5 -10   2  277.40    5.61   0
  -4 -17  10    4.51    0.89   0
  -4  22  -4    7.68    0.78   0
  -3 -16   9    6.53    0.92   0
  -3  14  -4   -0.46    1.13   0
  -3  15  -4   36.73    1.41   0
  -3  27  -3    3.86    0.83   0
  -2  24  -3    1.17    0.69   0
  -1  -8   3   26.83    1.30   0
  -1   1  -1    0.46    0.21   0
  -1   5  -2 1119.17    6.20   0
  -1  13  -3    8.14    1.13   0
  -1  19  -3    1.31    1.16   0
  -1  27  -2    1.27    0.91   0
   0 -14  11   20.81    1.22   0
   0 -13   9   -0.41    0.92   0
   1 -11   8   -1.15    0.99   0
   2 -12  13    7.92    0.64   0
   2 -12  14    9.03    0.82   0
   2  -6   5  202.64    2.04   0
   3 -10  13    0.67    0.86   0
   3  -9  10    0.32    0.66   0
   3  -2   4  334.71    2.77   0
   3  15   0   -0.23    1.55   0
   3  17   0   -0.91    1.32   0
   4  -8  13    0.44    0.80   0
   4  -6   9   63.01    1.42   0
   4  -5   8  169.90    1.77   0
   4  -4   7  452.22    2.72   0
   4  -1   5   88.91    1.59   0
   5  -1   7    2.42    0.80   0
   5  10   3  446.51    4.96   0
   6  -2  12   -0.75    0.81   0
   6   9   5  464.81    3.97   0
   7   1  14    6.95    0.58   0
   7   2  12    0.01    0.73   0
   7   5   9    0.69    0.73   0
   8  10  11   -0.27    0.79   0
 -13  -7   1    0.65    1.02   0
 -13   5  -3    0.35    0.96   0
 -12 -11   3    0.73    1.34   0
 -12   3  -3   21.39    1.09   0
 -11   2  -3   54.92    1.42   0
 -11   7  -4    2.78    1.01   0
 -10 -12   3    5.87    2.30   0
 -10  -7   0    9.16    1.22   0
 -10   6  -4    0.69    0.80   0
  -9   5  -4  509.33    2.96   0
  -9  16  -5    0.65    0.90   0
  -9  18  -5    5.75    0.83   0
  -8  16  -5   13.25    1.08   0
  -8  17  -5   23.17    1.16   0
  -8  18  -5    7.49    1.03   0
  -8  19  -5    2.29    0.85   0
  -7   5  -4    1.36    1.11   0
  -7  15  -5  177.36    1.82   0
  -7  16  -5   24.15    1.11   0
  -7  17  -5   32.98    1.15   0
  -7  18  -5    0.13    0.88   0
  -6  -7   0  107.41    2.71   0
  -6   6  -4   44.71    1.16   0
  -5   2  -3  321.58    2.65   0
  -5   7  -4   95.06    1.51   0
  -5  25  -4    4.57    0.69   0
  -4  23  -4    0.72    0.71   0
  -3 -17  12    1.71    0.75   0
  -3  13  -4  546.65    3.10   0
  -3  20  -4    7.42    0.91   0
  -2 -16  11   13.37    0.75   0
  -2 -15   9   49.50    1.14   0
  -2  25  -3    0.70    0.90   0
  -1 -15  11   30.87    0.98   0
  -1 -14   9   11.85    1.00   0
  -1  21  -3   10.02    1.00   0
   0  -8   4   72.38    1.49   0
   0  24  -2   88.60    1.60   0
   0  29  -1    2.27    0.79   0
   1 -13  12   16.93    0.82   0
   1 -13  13   24.76    0.95   0
   1 -12  10    1.77    0.86   0
   1 -10   7  277.94    2.22   0
   1  -9   6   15.99    0.76   0
   2 -11  11    1.90    0.85   0
   2 -10   9  130.52    1.51   0
   2  15  -1  430.18    4.38   0
   2  16  -1   -0.22    1.20   0
   2  17  -1   94.93    2.06   0
   2  18  -1   31.00    1.65   0
   2  26   0    2.78    0.94   0
   3 -10  14    5.93    0.75   0
   3 -10  15    0.32    0.69   0
   3  -8   9  176.06    1.73   0
   3  -5   6  442.10    2.62   0
   3  14   0   -0.16    1.45   0
   3  18   0   -0.04    1.39   0
   3  26   1    4.82    1.05   0
   4  -8  14    0.69    0.54   0
   4  -8  15   29.31    0.84   0
   4  -7  11    3.99    0.78   0
   5  -5  12   20.95    0.89   0
   5  -3   9   31.30    1.22   0
   5  -2   8   53.96    1.29   0
   5   1   6   37.81    1.24   0
   5   3   5  221.95    2.31   0
   6  -2  13   22.86    0.87   0
   6   2   8   66.72    1.47   0
   7   2  13    0.68    0.64   0
   7   3  11   44.65    1.08   0
   7   4  10    7.25    0.87   0
   7  11   7  101.27    1.88   0
   7  21   7   -0.31    1.12   0
   8   9  12   -0.53    0.65   0
   8  11  11    0.47    0.79   0
   8  14  10    2.56    0.88   0
   8  15  10    7.93    1.09   0
   8  16  10    0.73    1.12   0
 -13  -5   0    1.03    0.91   0
 -13   4  -3   10.25    0.93   0
 -12  -6   0    1.93    1.08   0
 -12  -1  -2    1.52    0.90   0
 -12   8  -4    0.63    0.97   0
 -11   6  -4   34.47    1.15   0
 -10  -9   1    0.38    1.23   0
 -10  -5  -1   45.77    1.55   0
 -10   1  -3   36.81    1.09   0
 -10   5  -4   55.93    1.33   0
 -10  14  -5   28.95    1.08   0
 -10  16  -5   25.91    1.12   0
 -10  17  -5   -0.16    1.00   0
 -10  18  -5   40.80    1.12   0
  -9  12  -5   50.92    1.29   0
  -9  14  -5   17.17    0.86   0
  -9  19  -5    0.86    0.69   0
  -9  20  -5    1.81    0.99   0
  -8  12  -5   37.60    1.15   0
  -8  13  -5   28.78    0.97   0
  -8  21  -5   16.88    0.95   0
  -7  14  -5    0.67    0.71   0
  -7  19  -5    0.81    0.97   0
  -7  20  -5   -1.50    0.87   0
  -6 -15   6   44.80    1.56   0
  -6   1  -3   18.65    1.13   0
  -6  16  -5   23.17    0.99   0
  -6  17  -5   71.64    1.36   0
  -4 -15   7   62.86    1.41   0
  -4   3  -3  568.53    3.58   0
  -4  24  -4    0.74    0.92   0
  -3 -15   8   42.99    1.21   0
  -3  12  -4  123.73    1.80   0
  -3  21  -4   24.93    1.14   0
  -3  28  -3    1.88    0.87   0
  -2 -16  12   11.55    0.92   0
  -2   7  -3  673.50    3.84   0
  -1 -15  12    0.71    0.83   0
  -1  11  -3    7.82    1.13   0
  -1  28  -2    2.39    0.93   0
   0 -14  12    2.62    0.75   0
   0 -12   8   96.09    1.51   0
   0   8  -2  911.30    5.87   0
   1 -13  14    2.48    0.72   0
   1  26  -1   25.04    1.12   0
   2 -11  12   56.49    1.14   0
   2  -9   8  444.77    2.64   0
   2  -8   7   -0.29    0.95   0
   2  -7   6  350.37    2.41   0
   2  14  -1    7.64    1.32   0
   2  19  -1  532.13    4.18   0
   3  -9  11    4.99    0.72   0
   3  -7   8   35.15    1.16   0
   3  -6   7    0.77    0.93   0
   3  19   0   -0.28    1.33   0
   4  25   2    7.64    1.30   0
   5  -5  13   13.03    0.69   0
   5  -5  14   -0.69    0.66   0
   5  -5  15    4.08    0.67   0
   5  -4  11   64.62    1.18   0
   6  -2  14   -0.01    0.52   0
   6  -1  11   -0.22    0.66   0
   6   1   9   40.65    1.18   0
   6   4   7    1.74    1.09   0
   6   6   6   55.69    1.56   0
   7   2  14   -0.74    0.47   0
   7   3  12    1.06    0.74   0
   7   6   9    3.28    0.82   0
   7  12   7    7.28    1.26   0
   8  10  12   13.52    0.81   0
   8  12  11   -0.05    0.86   0
 -13  -3  -1    0.57    1.09   0
 -13   0  -2  144.81    1.97   0
 -12  -8   1    3.47    1.16   0
 -12   7  -4    4.04    0.88   0
 -11  -2  -2   40.70    1.46   0
 -10  12  -5    1.86    0.90   0
 -10  13  -5   72.46    1.46   0
  -9 -16   7   11.98    1.35   0
  -9  11  -5   14.82    1.20   0
  -8  -3  -2    0.61    1.16   0
  -8   0  -3   -0.56    1.07   0
  -8   4  -4    4.74    1.15   0
  -8  11  -5   17.23    1.02   0
  -8  22  -5    1.77    0.91   0
  -7 -16   7    0.13    0.95   0
  -7  11  -5   17.05    1.10   0
  -7  12  -5    4.30    0.83   0
  -7  21  -5    8.73    0.96   0
  -7  22  -5   -1.25    0.84   0
  -6 -17   9   30.42    1.14   0
  -6 -13   4    0.73    1.47   0
  -6  14  -5   -1.59    1.08   0
  -6  18  -5    1.13    0.84   0
  -6  19  -5    2.77    1.00   0
  -6  20  -5   27.65    1.02   0
  -5   6  -4  558.79    3.07   0
  -4 -17  11    3.01    0.84   0
  -4 -12   4    2.50    1.69   0
  -4   8  -4    7.30    1.02   0
  -4  25  -4    7.38    0.94   0
  -3 -16  10    5.86    0.83   0
  -3 -10   3   30.78    1.31   0
  -3  11  -4   58.83    1.34   0
  -3  22  -4    5.00    1.02   0
  -2 -16  13    6.12    0.85   0
  -2 -14   8    3.38    0.98   0
  -2  -9   3  320.17    3.16   0
  -1 -15  13    1.73    0.78   0
  -1 -13   8   18.89    1.21   0
  -1  22  -3   42.43    1.32   0
   0 -14  14   -0.23    0.81   0
   0 -13  10    0.59    0.89   0
   0  25  -2   -0.67    0.94   0
   2 -11  13    1.49    0.83   0
   2 -11  15    3.05    0.77   0
   2 -10  10  140.81    1.53   0
   2  20  -1   27.07    1.52   0
   3  -9  12    2.03    0.86   0
   4  -7  12    4.93    0.66   0
   4  -7  13   19.94    0.93   0
   4  -6  10    0.40    0.94   0
   4  -2   6  307.34    2.39   0
   4   8   2    0.67    1.56   0
   6  -1  12   25.08    0.90   0
   6  10   5   41.25    1.81   0
   7   3  13   -1.25    0.69   0
   7   3  14    1.14    0.65   0
   7   4  11   41.44    1.11   0
   7  13   7   53.22    1.86   0
   7  20   7    9.13    1.42   0
   8  11  12    1.31    0.68   0
   8  13  11    0.01    0.76   0
 -13  -9   2    5.36    1.06   0
 -12  -4  -1   -0.18    0.92   0
 -12   2  -3   21.25    1.17   0
 -11   1  -3  117.89    1.81   0
 -11   5  -4   21.80    1.04   0
 -11  13  -5   23.13    1.18   0
 -11  14  -5    1.84    1.01   0
 -11  15  -5    9.45    0.80   0
 -10 -15   6    2.94    1.42   0
 -10  11  -5    0.16    0.98   0
  -9  -3  -2   22.46    1.35   0
  -9   0  -3   -0.02    1.18   0
  -9   4  -4    6.79    0.87   0
  -9  10  -5   15.28    1.19   0
  -8 -16   7    3.70    1.07   0
  -8  10  -5  194.14    1.86   0
  -7  -3  -2  105.26    1.97   0
  -7   0  -3   -0.08    1.04   0
  -7   4  -4   29.00    1.32   0
  -7  10  -5    0.77    1.02   0
  -7  23  -5    3.62    0.90   0
  -6 -14   5    0.94    1.07   0
  -6  -5  -1    5.22    1.00   0
  -6  12  -5  168.11    1.91   0
  -6  21  -5    4.30    0.98   0
  -6  22  -5    2.87    0.85   0
  -5 -17  10    5.00    0.80   0
  -5 -16   8    9.95    0.91   0
  -5  16  -5   10.69    1.12   0
  -5  17  -5   23.85    1.12   0
  -5  18  -5   35.20    1.11   0
  -4 -17  12    0.40    0.87   0
  -4 -16   9   -0.34    0.86   0
  -4 -14   6  160.46    2.19   0
  -4 -13   5  871.43    4.84   0
  -4  26  -4    0.67    0.81   0
  -3  23  -4   61.92    1.31   0
  -2 -15  10    1.81    0.96   0
  -2  27  -3    4.18    0.83   0
  -1 -15  14   22.68    0.78   0
  -1 -14  10   71.89    1.29   0
  -1  10  -3  416.11    3.01   0
  -1  23  -3    1.28    1.01   0
  -1  29  -2    6.25    1.00   0
   0 -11   7   -0.25    0.81   0
   0 -10   6  208.22    1.93   0
   0  -9   5   -0.37    0.68   0
   1 -12  11   41.37    0.98   0
   1 -11   9    8.83    0.79   0
   1  -6   4   46.95    1.37   0
   1  15  -2   60.53    1.61   0
   1  16  -2  137.08    2.20   0
   1  17  -2  356.66    3.08   0
   1  18  -2    0.49    1.17   0
   2 -11  14    1.91    0.57   0
   2  -4   4  192.53    2.06   0
   2  27   0   15.01    1.08   0
   3  -9  13    7.18    0.78   0
   3  -9  14   -0.57    0.81   0
   3  -9  15    8.83    0.78   0
   3  -8  10    3.66    0.93   0
   3  -3   5  190.10    2.00   0
   3  13   0    0.27    1.32   0
   3  20   0   -1.13    1.38   0
   4  -7  14   -1.33    0.57   0
   4  -7  15   49.34    0.97   0
   4  -5   9   28.73    1.10   0
   4  -4   8  183.84    1.80   0
   4  -3   7   15.71    0.98   0
   5  -4  12    0.71    0.80   0
   5  -3  10   -0.47    0.58   0
   5  -2   9   39.22    1.28   0
   5  -1   8    4.82    1.07   0
   5  11   3  110.78    3.01   0
   6  -1  13   11.59    0.73   0
   6  -1  14    1.26    0.72   0
   6   0  11    0.54    0.85   0
   6   3   8   14.08    1.13   0
   7   4  12   13.31    0.84   0
   7   7   9    0.13    0.86   0
   7  14   7   24.31    1.57   0
 -13   3  -3    0.93    0.75   0
 -12   6  -4    7.91    1.07   0
 -11  -7   0    1.48    1.22   0
 -11  -5  -1   18.84    1.35   0
 -11  11  -5    1.33    0.85   0
 -11  12  -5    1.22    0.67   0
 -10  -3  -2   43.39    1.40   0
 -10   0  -3    0.03    1.04   0
 -10   4  -4   49.81    1.18   0
 -10  10  -5    5.51    1.06   0
  -9   9  -5    4.37    1.05   0
  -8   9  -5   13.60    1.12   0
  -7 -17   9   11.84    1.03   0
  -7 -12   3    0.33    2.06   0
  -6  11  -5    7.14    1.19   0
  -6  23  -5    4.30    0.84   0
  -5  -2  -2  366.55    3.21   0
  -5  14  -5    0.27    1.21   0
  -5  19  -5    1.12    0.77   0
  -5  20  -5    8.80    1.06   0
  -4  -1  -2  201.10    2.52   0
  -3 -16  11    2.92    0.87   0
  -3 -14   7   58.21    1.42   0
  -3   4  -3  745.34    4.01   0
  -3  24  -4    0.94    0.87   0
  -2   2  -2  127.47    2.28   0
  -2  16  -4   94.60    1.65   0
  -2  17  -4   32.09    1.29   0
  -2  18  -4   -0.51    1.09   0
  -1 -12   7   58.19    1.38   0
  -1  -9   4  119.83    1.85   0
  -1  24  -3   12.55    1.00   0
   0 -13  11   -0.52    0.87   0
   0  26  -2   33.06    1.24   0
   1 -12  12   33.14    0.98   0
   1 -10   8   62.74    1.36   0
   1  19  -2    1.59    1.28   0
   1  27  -1    3.24    0.86   0
   2 -10  11    4.52    0.76   0
   2  -9   9   85.14    1.42   0
   2   0   2 3761.54   12.84   0
   2  21  -1   -0.85    1.15   0
   3  -7   9   -0.04    0.97   0
   3  21   0   -0.07    1.33   0
   3  27   1    0.33    0.94   0
   4  -6  11    0.82    0.55   0
   4   0   5   -0.08    0.94   0
   4   2   4   44.43    1.39   0
   5  -4  13    0.02    0.57   0
   5  -4  14   18.39    0.73   0
   5  -4  15    0.29    0.54   0
   6   1  10    5.06    0.82   0
   6   5   7   17.99    1.23   0
   6  11   5    6.10    1.48   0
   7   4  13    2.44    0.56   0
   7   4  14    0.48    0.63   0
   7   5  11   -0.17    0.66   0
   7   6  10   -0.30    0.77   0
   7  15   7    1.20    1.23   0
   7  18   7    6.92    1.49   0
   7  19   7    0.28    1.07   0
 -13  -1  -2    0.02    0.86   0
 -12  -2  -2   -0.39    0.85   0
 -12   1  -3   26.95    1.14   0
 -12   5  -4   15.12    1.03   0
 -11   4  -4   27.48    1.14   0
 -11  10  -5    5.19    0.92   0
 -10   9  -5    3.00    1.07   0
  -9   3  -4   63.65    1.54   0
  -8 -17   9    0.94    0.94   0
  -8   3  -4   89.06    1.66   0
  -8   8  -5   33.37    1.23   0
  -7 -15   6   25.47    1.43   0
  -7   9  -5    2.77    1.22   0
  -6 -17  10    1.67    0.95   0
  -6   4  -4   10.61    1.07   0
  -6  10  -5   48.93    1.44   0
  -6  24  -5   11.05    1.07   0
  -5 -17  11   21.46    1.01   0
  -5   1  -3  109.30    1.80   0
  -5   5  -4  218.73    2.07   0
  -5  12  -5   77.92    1.55   0
  -5  21  -5   15.80    0.80   0
  -5  22  -5   14.99    1.06   0
  -4  27  -4    0.27    0.88   0
  -3 -16  12   16.11    0.92   0
  -3 -15   9   50.61    1.26   0
  -3 -13   6    7.00    1.08   0
  -3 -11   4   49.95    1.54   0
  -3   9  -4    4.34    1.00   0
  -3  25  -4   12.75    0.92   0
  -2 -15  11    2.14    0.84   0
  -2 -13   7  327.84    2.49   0
  -2   6  -3   24.21    1.12   0
  -2  14  -4  144.65    1.98   0
  -2  15  -4    0.32    0.84   0
  -2  19  -4   17.90    0.95   0
  -2  28  -3    6.67    0.88   0
  -1 -14  11   16.22    0.96   0
[truncated: 6,754,905 more chars]
